# Supplementary material for: Deep carbon cycle and early Earth´s oxygenation: evidence from ultra-high-pressure metamorphic rocks
Source: Research Square preprint supplement (doi:10.21203/rs.3.rs-6229822/v1), 2025-03-25
Supplement: Supplementary file 1 [file 0cfd0094ec089825ab313bfd.docx]

Supplementary Material to:

**Deep carbon cycle and early Earth´s oxygenation: evidence from ultra-high-pressure metamorphic rocks**

Evilarde Carvalho Uchôa Filhoa,e; Felipe Holanda dos Santosb,e; Douglas Teixeira Martinsd; Wagner da Silva Amaralc; José Alberto Rodrigues do Valea; Antônio Paulo Henrique Ramos Soarese

a Geological Survey of Brazil – SGB – DGM

b Department of Geology, Federal University of Ceará, 60455-760, Fortaleza-CE, Brazil

c Institute of Geosciences, State University of Campinas (UNICAMP), Campinas, São Paulo, Brazil

d Federal Institute of Piauí, 64750-000 Paulistana, PI, Brazil

e Geology Graduate Program (PPGG), Federal University of Ceará (UFC), Fortaleza, Ceará, Brazil

*Email address of the corresponding author:* [*evilarde.uchoa@sgb.gov.br*](mailto:evilarde.uchoa@sgb.gov.br)

**Methods**

**Supplementary Figures**

**Reference**

**Methods**

**Sampling**

Drill cores from the Lagoa do Riacho deposit, specifically Ocr-1, Ocr-4, and Ocr-8, were used to examine the graphite-manganese-bearing rocks in this study. The sampling process favored fresh, unaltered rock without indications of supergene enrichment or late hydrothermal effects.

**Petrography and mineral chemistry**

Petrographic analyses were conducted utilizing transmitted and reflected light microscopy techniques on thin and polished sections of representative samples. These studies were conducted at the SEM Lab of the Federal University of Ceará (UFC), utilizing a Leica DM 50P polarizing microscope. Complementing these investigations, scanning electron microscopy (SEM) was employed, using a Hitachi TM-3000 model operated at an acceleration voltage of 15 kV and a beam current of 20 nA at the Federal University of Ceará (UFC). Mineral abbreviation symbols follow Waar1.

Electron Microprobe Analysis (EMPA) was performed using a JEOL JXA-8230 super probe, equipped with five wavelength-dispersive spectrometers (WDS), at the Laboratory of Microscopy and Microanalysis (LMic) of the Department of Geology at the Federal University of Ouro Preto, Brazil.

The analyses were conducted in two separate routines: one focused on sulfides and another on silicates. For sulfide analysis, seven different analyzing crystals were used: thallium acid phthalate (TAP in WDS 2), lithium fluoride on an H-type spectrometer (LIFH in WDS 3), pentaerythritol on an H-type spectrometer (PETH in WDS 3), high-reflectivity pentaerythritol (PETJ in WDS 4), lithium fluoride (LIF in WDS 4), pentaerythritol (PETL in WDS 5), and lithium fluoride (LIFL in WDS 5). The instrument was operated at an accelerating voltage of 20 kV, with a beam current of 40 nA and a diameter of 5 μm (1 μm for tiny grains). The working distance was fixed at 11 mm with no variation during the analysis.

Drill cores, lithologies, samples, and thin-section schemas.

For silicate analysis, six different crystals were used: thallium acid phthalate on H-type spectrometer (TAPH in WDS 1), thallium acid phthalate (TAP in WDS 2), lithium fluoride on H-type spectrometer (LIFH in WDS 3), pentaerythritol on H-type spectrometer (PETH in WDS 3), pentaerythritol (PETL in WDS 5), and lithium fluoride (LIFL in WDS 5). The instrument was operated at an accelerating voltage of 15 kV, with a beam current of 20 nA and a diameter of 5 μm (1 μm for tiny grains). The working distance remained fixed at 11 mm.

The JEOL EMPA software, version 3.0.1.16, was used for calibration, overlap correction, and quantification. For sulfide analysis, the following standards were used: gold (Au), selenium (Se), indium arsenide (InAs), silver telluride (Te and Ag), indium antimonide (Sb), U-glass (U), cobalt (Co), magnetite (Fe), pyrite (S), glass-rhyolitic IR-W (V), fluorapatite (F), copper (Cu), nickel (Ni), cadmium sulfide (CdS), bismuth (Bi), mercury sulfide (HgS), rutile (Ti), gahnite (Zn), tin dioxide (SnO2), palladium (Pd), manganese (Mn), molybdenum (Mo), and platinum (Pt). Counting times for Cr, Mn, and P were set at 30 s at the peak and 15 s at the background, while for Na, F, Si, Al, Mg, Fe, Cl, Ti, Ca, and K, they were set at 10 s at the peak and 5 s at the background. Major spectral interferences were corrected during standard analysis and quantification. Kα X-ray lines were used for all elements.

For silicate analysis, the following standards were used: anorthoclase (Na), CaF2 (F), quartz (Si), corundum (Al), olivine (Mg), BaSO4 (Ba), magnetite (Fe), scapolite (Cl), chromite (Cr), fluorapatite (P and Ca), strontianite (Sr), rutile (Ti), microcline (K), and MnO (Mn). Counting times for Ba, Sr, and P were set at 30 s at the peak and 15 s at the background, while for Na, F, Si, Al, Mg, Fe, Cl, Ti, Ca, K, and Mn, they were set at 10 s at the peak and 5 s at the background. Major spectral interferences were corrected during standard analysis and quantification. Lα X-ray was used for Ba and Sr, while Kα X-ray was used for Na, F, Si, Al, Mg, Fe, Cl, P, Cr, Ti, Ca, K, and Mn. The total iron content obtained by the microprobe is considered as FeO.

**Mineralogy and textural features of the graphite-manganese-bearing rocks (supplementary)**

The lithologies analyzed in this study include (i) silicate manganese ore (SMO), (ii) oxidized manganese ore (OMO), (iii) graphite-bearing gondite, and (iv) graphite-bearing pelitic gneiss. SMO predominantly comprises tephroite, spessartine, and rhodonite, displaying a granoblastic texture. Two main SMO facies have been identified: (i) massive facies, primarily consisting of tephroite and rhodonite, and (ii) banded facies, characterized by alternating layers rich in manganese silicates. Rhodonite occurs as coarse-grained crystals, with occurrences of replacement by manganese-amphibole. Spessartine appears idioblastic to subidioblastic crystals, frequently intergrown with rhodonite and tephroite. Accessory minerals include various sulfides, such as cobaltite, siegenite, and pyrite, as well as carbonates, manganese oxides, and hydroxides like pyrolusite, cryptomelane, and todorokite.

OMO primarily comprises manganese oxides and oxyhydroxides, including pyrolusite cryptomelane and spessartine. Exhibits a banded structure characterized by alternating layers rich in spessartine and manganese oxides. Spessartine occurs as idioblastic to subidioblastic porphyroblasts, frequently containing carbonate, graphite, and, rarely, diamond micro-inclusions. These micro-inclusions form aligned trails within the garnet matrix. Coarse-grained rhodonite is also present, frequently crosscut by veins of pyrolusite and cryptomelane. Todorokite and pyrolusite replace manganese silicate minerals.

Graphite-bearing gondite exhibits a grano-lepidoblastic texture, with foliation defined by the orientation of graphite flakes. These rocks consist of graphite, quartz, and spessartine, with potassium feldspar, sulfides (including pyrite, chalcopyrite, and covellite), and barite as accessory minerals. Amphibole and phlogopite locally occur in altered zones. Garnet grains frequently contain micro-inclusions of sulfides and graphite.

Graphite-bearing pelitic gneiss is a well-foliated, medium to coarse-grained rock composed primarily of biotite, muscovite, sillimanite, quartz, feldspar, graphite, and almandine. Accessory minerals include zircon, monazite, rutile, and ilmenite. Quartz exhibits undulatory extinction and recrystallization into sub-grains, forming semi-continuous granoblastic lenses associated with feldspar. Biotite and muscovite occur in lepidoblastic layers interspersed with granoblastic domains, defining an Sn foliation that commonly wraps around garnet porphyroblasts. Almandine grains frequently contain micro-inclusions of quartz, biotite, sulfides, graphite, and, rarely, diamond.

**Raman thermometry**

Using five graphite crystals from the rock matrix, Raman spectroscopy was employed to assess the crystallization temperature of the carbonaceous matter (graphite) associated with manganese-bearing rocks. The Raman spectra of these carbonaceous materials were acquired using a Raman spectroscopy analysis conducted at the Central Analítica of the Federal University of Ceará (UFC), utilizing the Witec Alpha 300 equipment equipped with a UHTS300M system. For all measurements, an excitation wavelength of 532 nm for 5 seconds at a power of 10 mW.

The Raman mapping was conducted with high spatial resolution and precision. Scan speeds were configured at 320 seconds per line and 340 seconds per line, respectively, with a retrace speed of 0.5 seconds per line and an integration time of 5 seconds. Both setups employed a 600 g/mm grating (BLZ 500 nm), with a spectral center at 2210.124 cm⁻¹ and a center wavelength of 602.887 nm. The laser power was maintained at 3.6 mW for the larger area and 356 µW for the smaller area, with the sensor temperature consistently set to -61 °C. These controlled experimental conditions ensured the accuracy and reproducibility of the Raman mapping data.

The spectra were obtained from various crystals for each meticulously polished thin section. The acquired data, including peak positions, G, D1, and D2 band areas, and full width at half maximum (FWHM), were analyzed using an open-source software application, Fityk 1.3.1. In the Raman spectrum pertaining to graphite, two distinct regions are identified: the first-order region, which extends from 1100 to 2000 cm-1, is frequently employed in thermobarometric analyses of carbonaceous substances2, while the second-order region ranges from 2100 to 3300 cm-1. Well-structured graphite generally reveals a dominant graphite band at approximately 1580 cm-1 (G-band) in the first-order region. In contrast, disordered graphite displays adjacent bands at 1350 cm-1 (D1), 1620 cm-1 (D2), and 1500 cm-1 (D3). The diamond phase in the samples was identified using Raman spectroscopy with an excitation laser of 532 nm wavelength. Diamond crystals exhibit a strong band at approximately 1332 cm⁻¹, characteristic of the T₂g vibrational mode of the cubic diamond structure. The shift and broadening of this band indicate possible internal stresses and crystallographic variations. Comparison with graphite spectra allows differentiation of carbon phases, considering the D (~1350 cm⁻¹) and G (~1580 cm⁻¹) bands associated with graphite and amorphous carbon.

The metamorphic temperature can be determined utilizing the parameters that Beyssac et al.2 delineated in Equation I:

1. T(ºC)=−455ºC x D1/(G+D1+D2) band area ratio + 641.

This mathematical formulation is relevant within the thermal spectrum of 330 to 650°C, encompassing the metamorphic domain from greenschist to amphibolite facies, and yields a precision of ±50 °C. The thermometer itself is linked to a presumed error margin of ± 50°C. While graphitization generally signifies an irreversible phenomenon, thereby reliably documenting a maximum temperature, mechanical deformation may reduce the recorded temperature3–5. Therefore, we implement a correction coefficient derived from Barzoi3 alongside the traditional thermometer by Beyssac et al.2 to alleviate the deformation effects. The resulting adjusted temperature is calculated utilizing Equation II:

1. Tcorrected=T[i] / ζstrain

Where ζstrain represents positive values, with a maximum of 1 for high-strained graphite samples, T[i] is the temperature extracted from equation I above.

**Carbon isotopic modeling**

Graphite and diamond formation conditions were modeled from COH fluids using the Thermotopes-COH software. This open-source program, developed by Boutier et al.6, allows thermodynamic and isotopic calculations for carbon-oxygen-hydrogen (COH) systems within the range of 0.1–5 GPa and 300–900°C. The isotopic modeling and graphite/diamond precipitation tools were employed to simulate the isotopic and thermodynamic evolution of fluids and solids during dissolution, precipitation, and fluid-rock interaction processes. The δ¹³C isotopic data used as input were sourced from Santos et al.7, and the analysis considered isotopic equilibrium conditions and fluid compositional evolution to reconstruct the processes responsible for the formation of graphite and diamond.

The isotopic modeling of carbon fractionation between CH₄+CO₂ fluid and diamond was conducted to evaluate the evolution of isotopic composition during diamond precipitation. The calculations started with an initial fluid isotopic composition of δ¹³C = -29‰, considering the system’s evolution as carbon was progressively incorporated into the solid phase. Fractionation factors followed the parameters established by Bottinga8. The evolution of carbon polymorph stability was analyzed in the COH ternary diagram and contour maps of mineral stability and fluid composition (0.5-3.7 GPa, 350–900°C). The carbon activity was maintained at aC = 1.0, ensuring saturation with respect to carbon-bearing phases. At the same time, the oxygen fugacity was set at 0.5 log units below the reference buffer (Δ buffer = -0.5, Miozzi & Tumiati9. Under these conditions, the diamond was identified as the stable carbon phase, with the final precipitated product exhibiting an isotopic composition of δ¹³C = -15.28‰, reflecting the fractionation processes that occurred during carbon redistribution between the fluid and solid phases.

**References**

1. Warr, L. N. IMA–CNMNC approved mineral symbols. *Mineral. Mag.* **85**, 291–320 (2021).

2. Beyssac, O., Goffé, B., Chopin, C. & Rouzaud, J. N. Raman spectra of carbonaceous material in metasediments: a new geothermometer. *J. Metamorph. Geol.* **20**, 859–871 (2002).

3. Barzoi, S. C. Shear stress in the graphitization of carbonaceous matter during the low-grade metamorphism from the northern Parang Mountains (South Carpathians) — Implications to graphite geothermometry. *Int. J. Coal Geol.* **146**, 179–187 (2015).

4. Kirilova, M. *et al.* Structural disorder of graphite and implications for graphite thermometry. *Solid Earth* **9**, 223–231 (2018).

5. Kouketsu, Y. *et al.* Drastic effect of shearing on graphite microtexture: attention and application to Earth science. *Prog. Earth Planet. Sci.* **6**, 23 (2019).

6. Boutier, A. *et al.* Thermotopes-COH—A software for carbon isotope modeling and speciation of COH fluids. *Comput. Geosci.* **184**, 105533 (2024).

7. Santos, F. H. *et al.* The origin and fate of organic carbon in graphite-manganese bearing rocks and implications for the Lomagundi-Jatuli Event. Preprint at https://doi.org/10.21203/rs.3.rs-4259369/v1 (2024).

8. Bottinga, Y. Calculated fractionation factors for carbon and hydrogen isotope exchange in the system calcite-carbon dioxide-graphite-methane-hydrogen-water vapor. *Geochim. Cosmochim. Acta* **33**, 49–64 (1969).

9. Miozzi, F. & Tumiati, S. Aqueous concentration of CO2 in carbon-saturated fluids as a highly sensitive oxybarometer. *Geochem. Perspect. Lett.* **16**, 30–34 (2020).

**Figures**

**Supplementary Figure 1:** Supplementary material related to Figure 1D: Drill cores, lithologies, and thin section scanner with highlighted study targets.

**Supplementary Figure 2:** Supplementary material related to Figure 2, including EMPA/SEM and EDS spectra, as well as Raman data, for selected minerals investigated in the petrography section. (A) Thin section of sample 10046 (SMO) showing the rock texture, occurrence of siegenite intergrown with graphite, and analytical data for the respective minerals; (B) Thin section of sample 10247 (SMO) showing the rock texture, occurrence of cobaltite and todorokite intergrown with graphite, and analytical data for the respective minerals; and (C) Thin section of sample 10055 (graphite-bearing gondite) showing the rock texture, occurrence of graphite inclusion in spessartine, and analytical data for the respective minerals.

**Supplementary Figure 3:** Supplementary material related to Figure 3: SEM images and EDS spectra/Raman data for selected minerals investigated in the petrography section. (A) Thin section of sample 10243 (OMO) showing the rock texture and occurrence of graphite, carbonate, and diamond inclusions, along with analytical data for the respective minerals and Raman fitting; (B) Thin section of sample 10029 (graphite-bearing pelitic gneiss) showing the texture and structure of the rock, occurrence of biotite, quartz, graphite, and diamond inclusions in almandine, along with analytical data for the respective minerals and Raman fitting.

**Supplementary Figure 4:** Supplementary material related to Figure 2E: Raman mapping. (A) FWHM; and (B) Intensity.

**Supplementary Figure 5:** Supplementary material related to Figure 3D: Raman mapping. (A) FWHM; and (B) Intensity.

**Supplementary Figure 6:** Supplementary material related to Figure 3K: Raman mapping. (A) Intensity; (B) FWHM; and (C) Position.


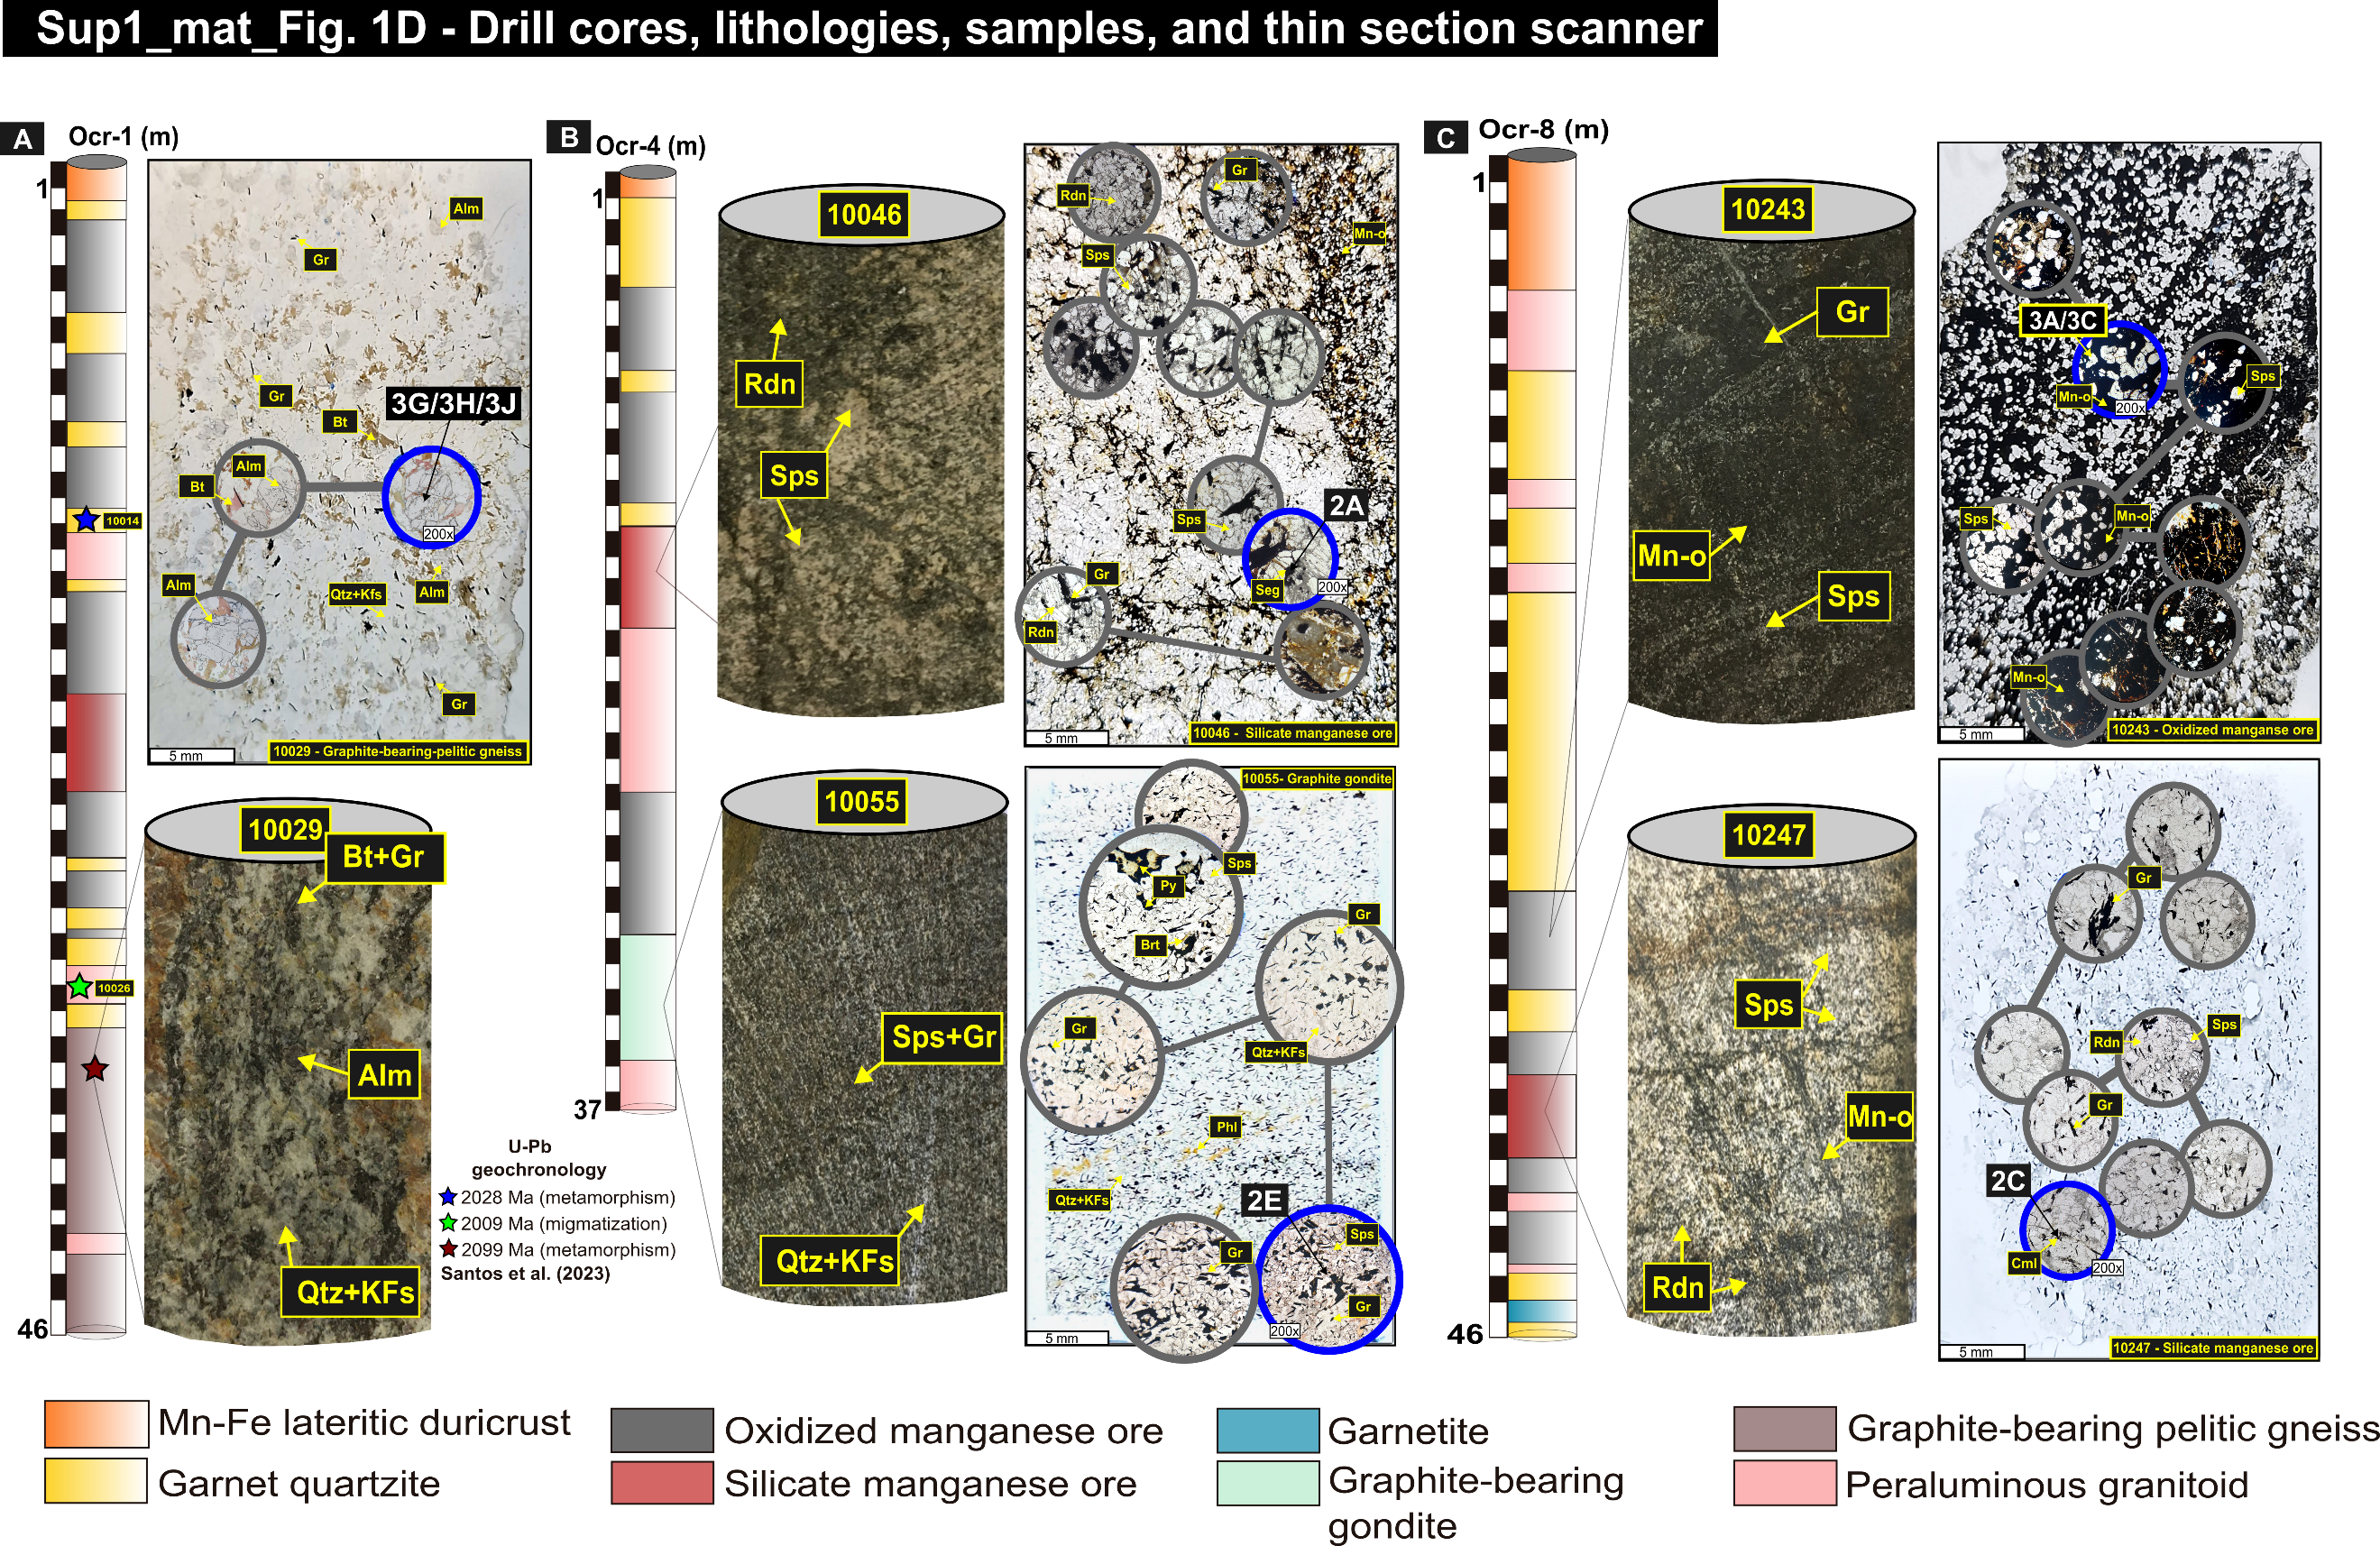


Supplementary Figure 1: Supplementary material related to Figure 1D, including drill cores, lithologies, and a thin section scanner with highlighted study targets.


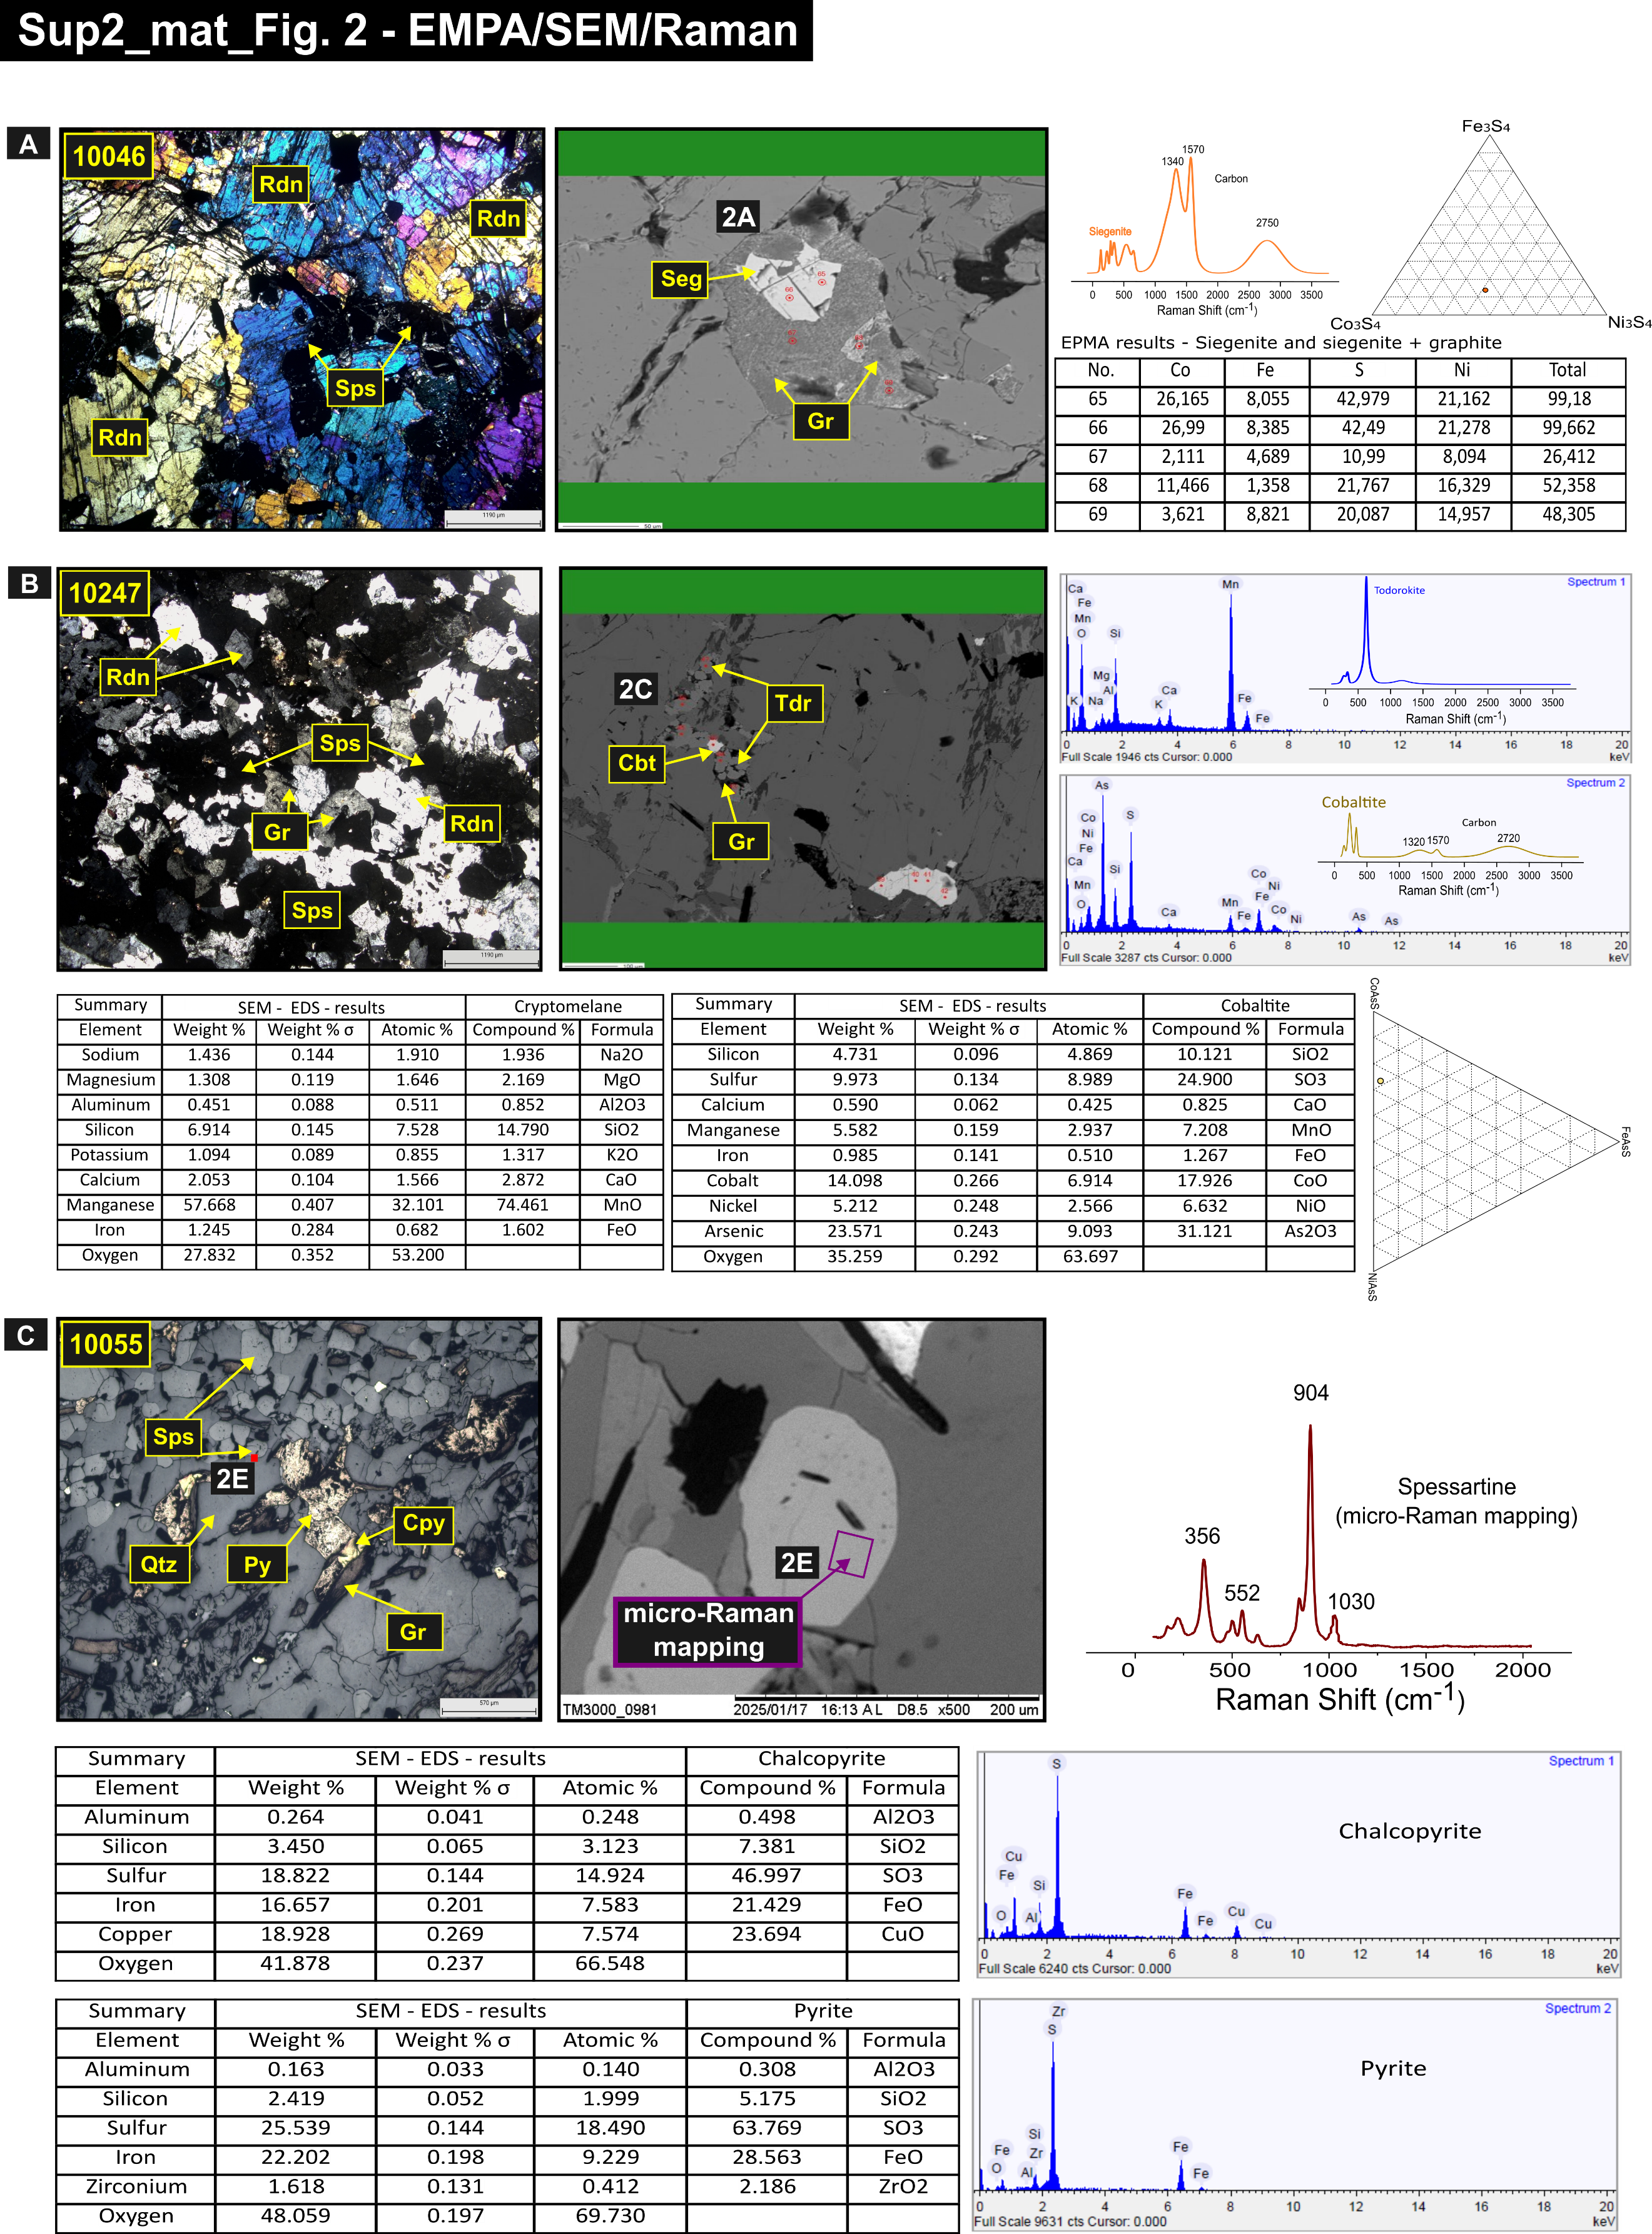


Supplementary Figure 2: Supplementary material related to Figure 2, including EMPA/SEM and EDS spectra, as well as Raman data, for selected minerals investigated in the petrography section. (A) Thin section of sample 10046 (SMO) showing the rock texture, occurrence of siegenite intergrown with graphite, and analytical data for the respective minerals; (B) Thin section of sample 10247 (SMO) showing the rock texture, occurrence of cobaltite and todorokite intergrown with graphite, and analytical data for the respective minerals; and (C) Thin section of sample 10055 (graphite-bearing gondite) showing the rock texture, occurrence of graphite inclusion in spessartine, and analytical data for the respective minerals.


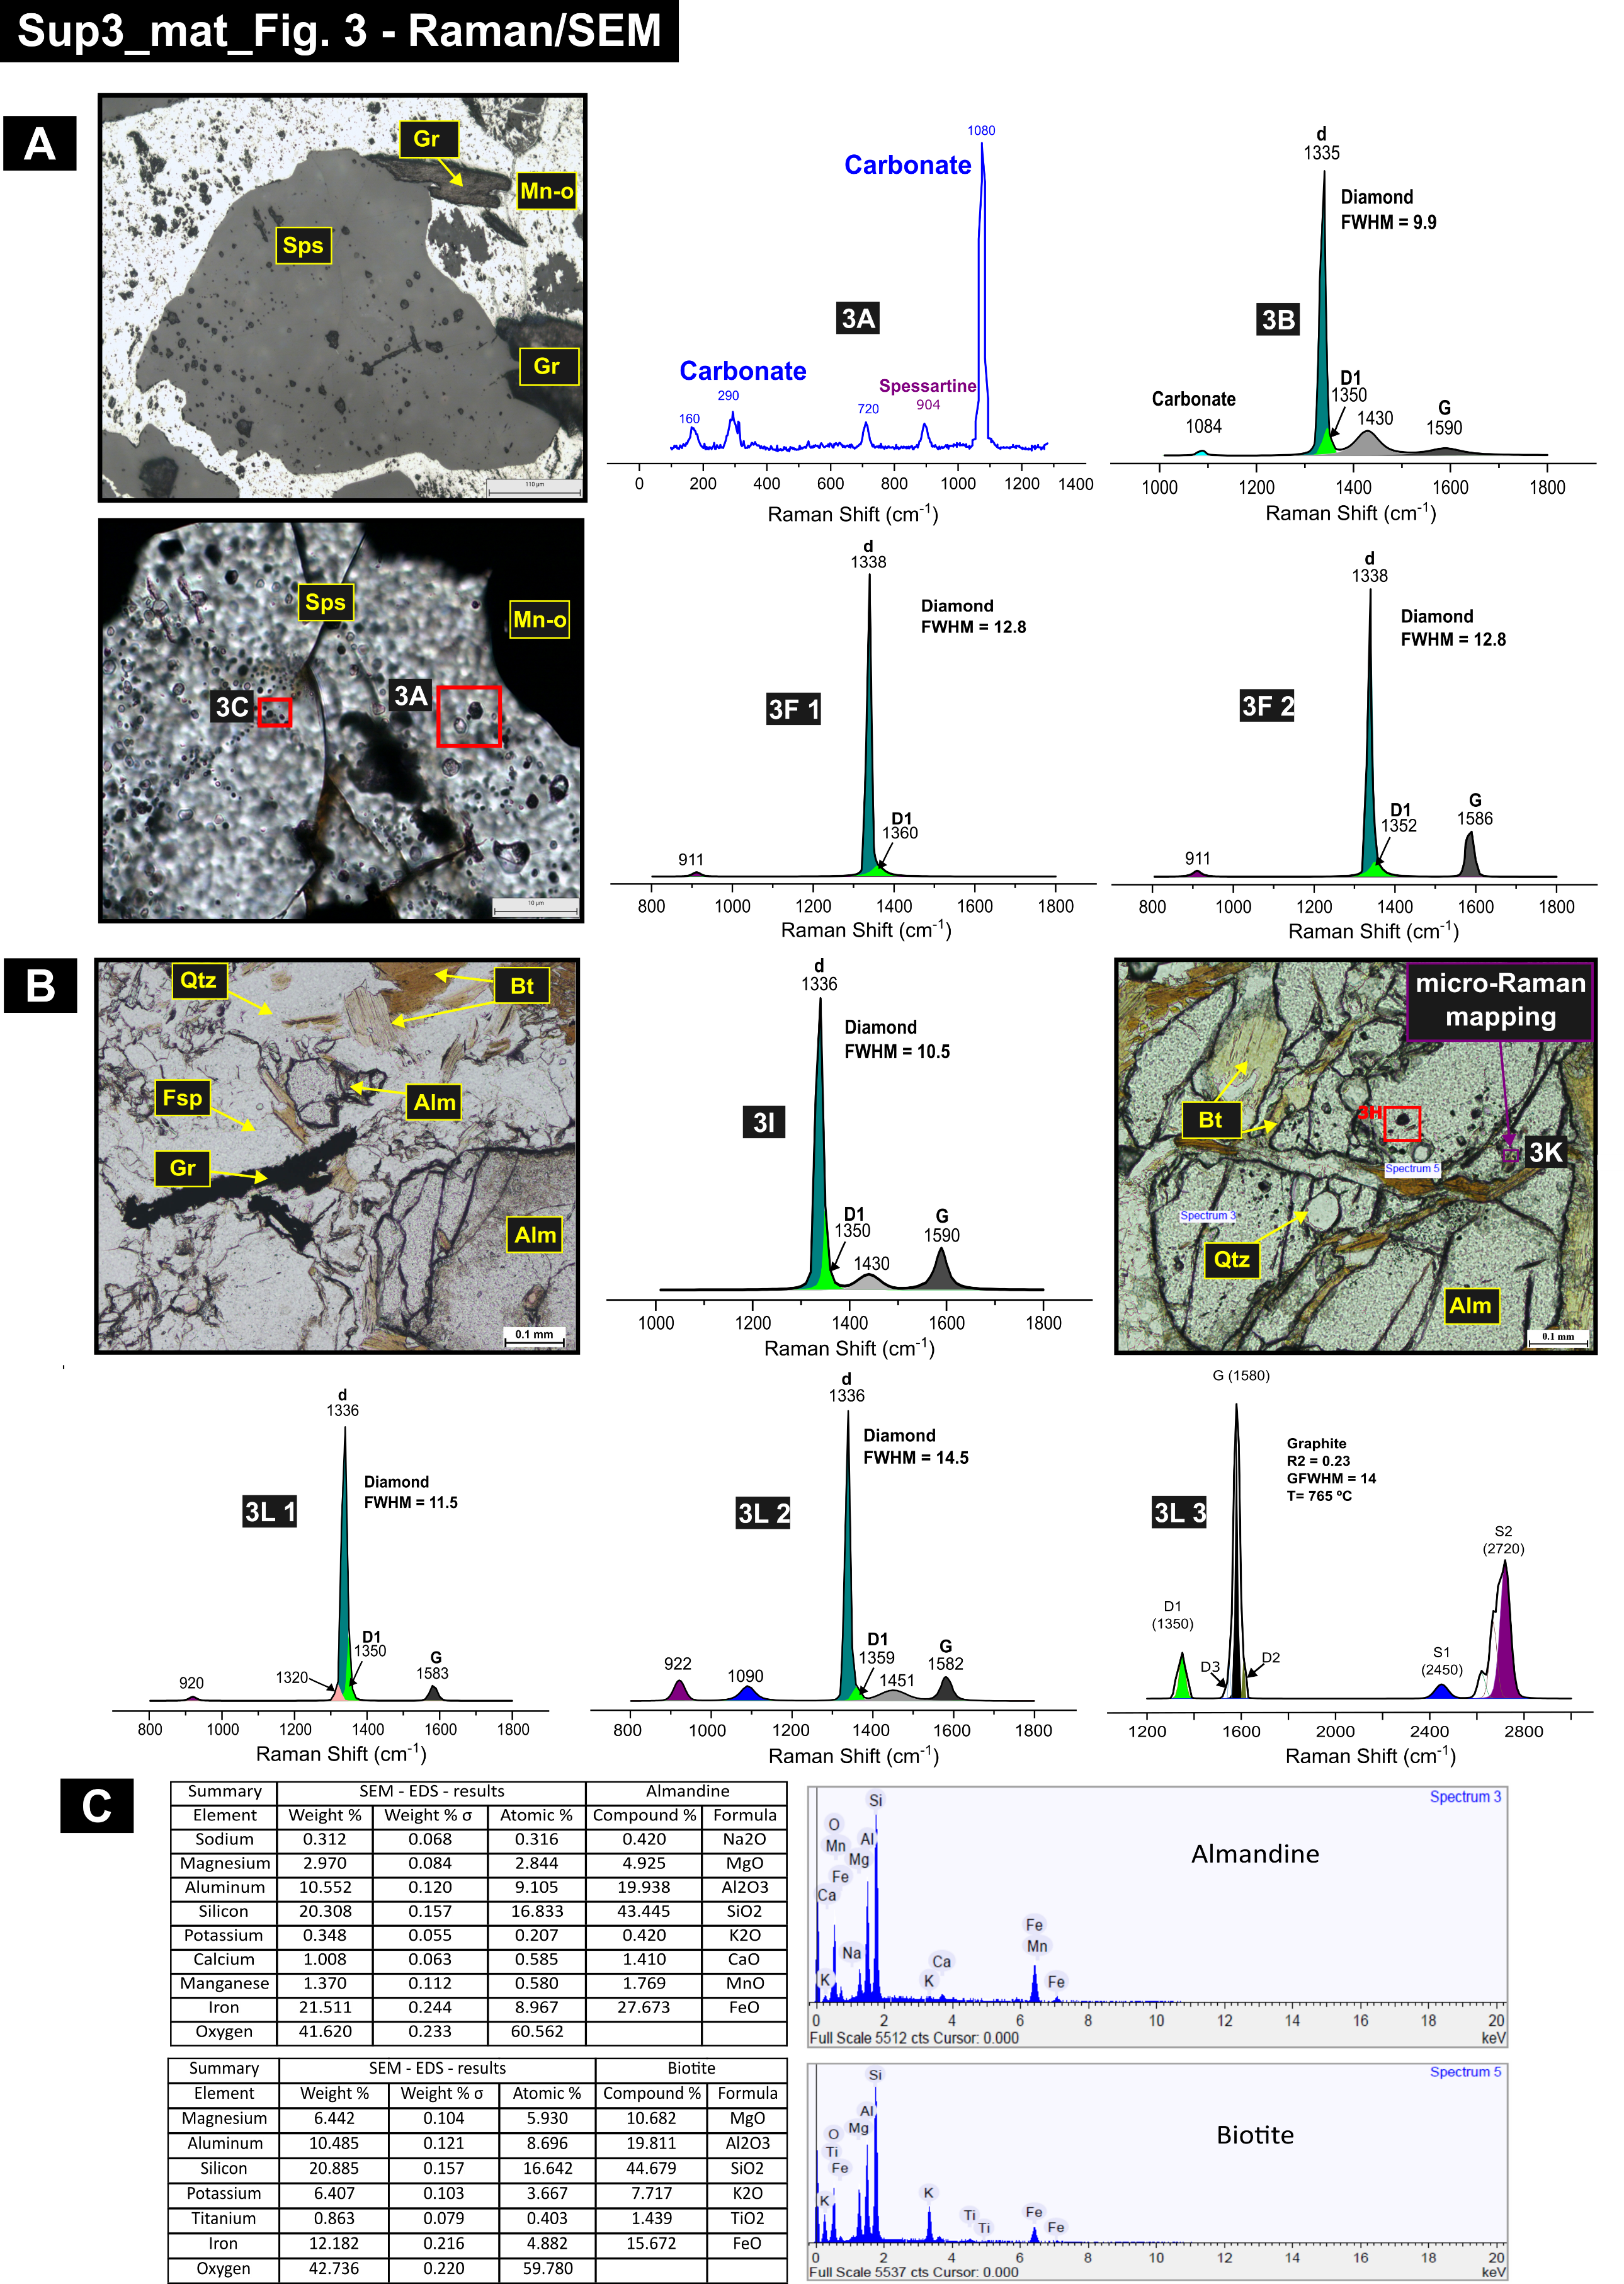


Supplementary Figure 3: Supplementary material related to Figure 3: SEM images and EDS spectra/Raman data for selected minerals investigated in the petrography section. (A) Thin section of sample 10243 (OMO) showing the rock texture and occurrence of graphite, carbonate, and diamond inclusions, along with analytical data for the respective minerals and Raman fitting; (B) Thin section of sample 10029 (graphite-bearing pelitic gneiss) showing the texture and structure of the rock, occurrence of biotite, quartz, graphite, and diamond inclusions in almandine, along with analytical data for the respective minerals and Raman fitting.


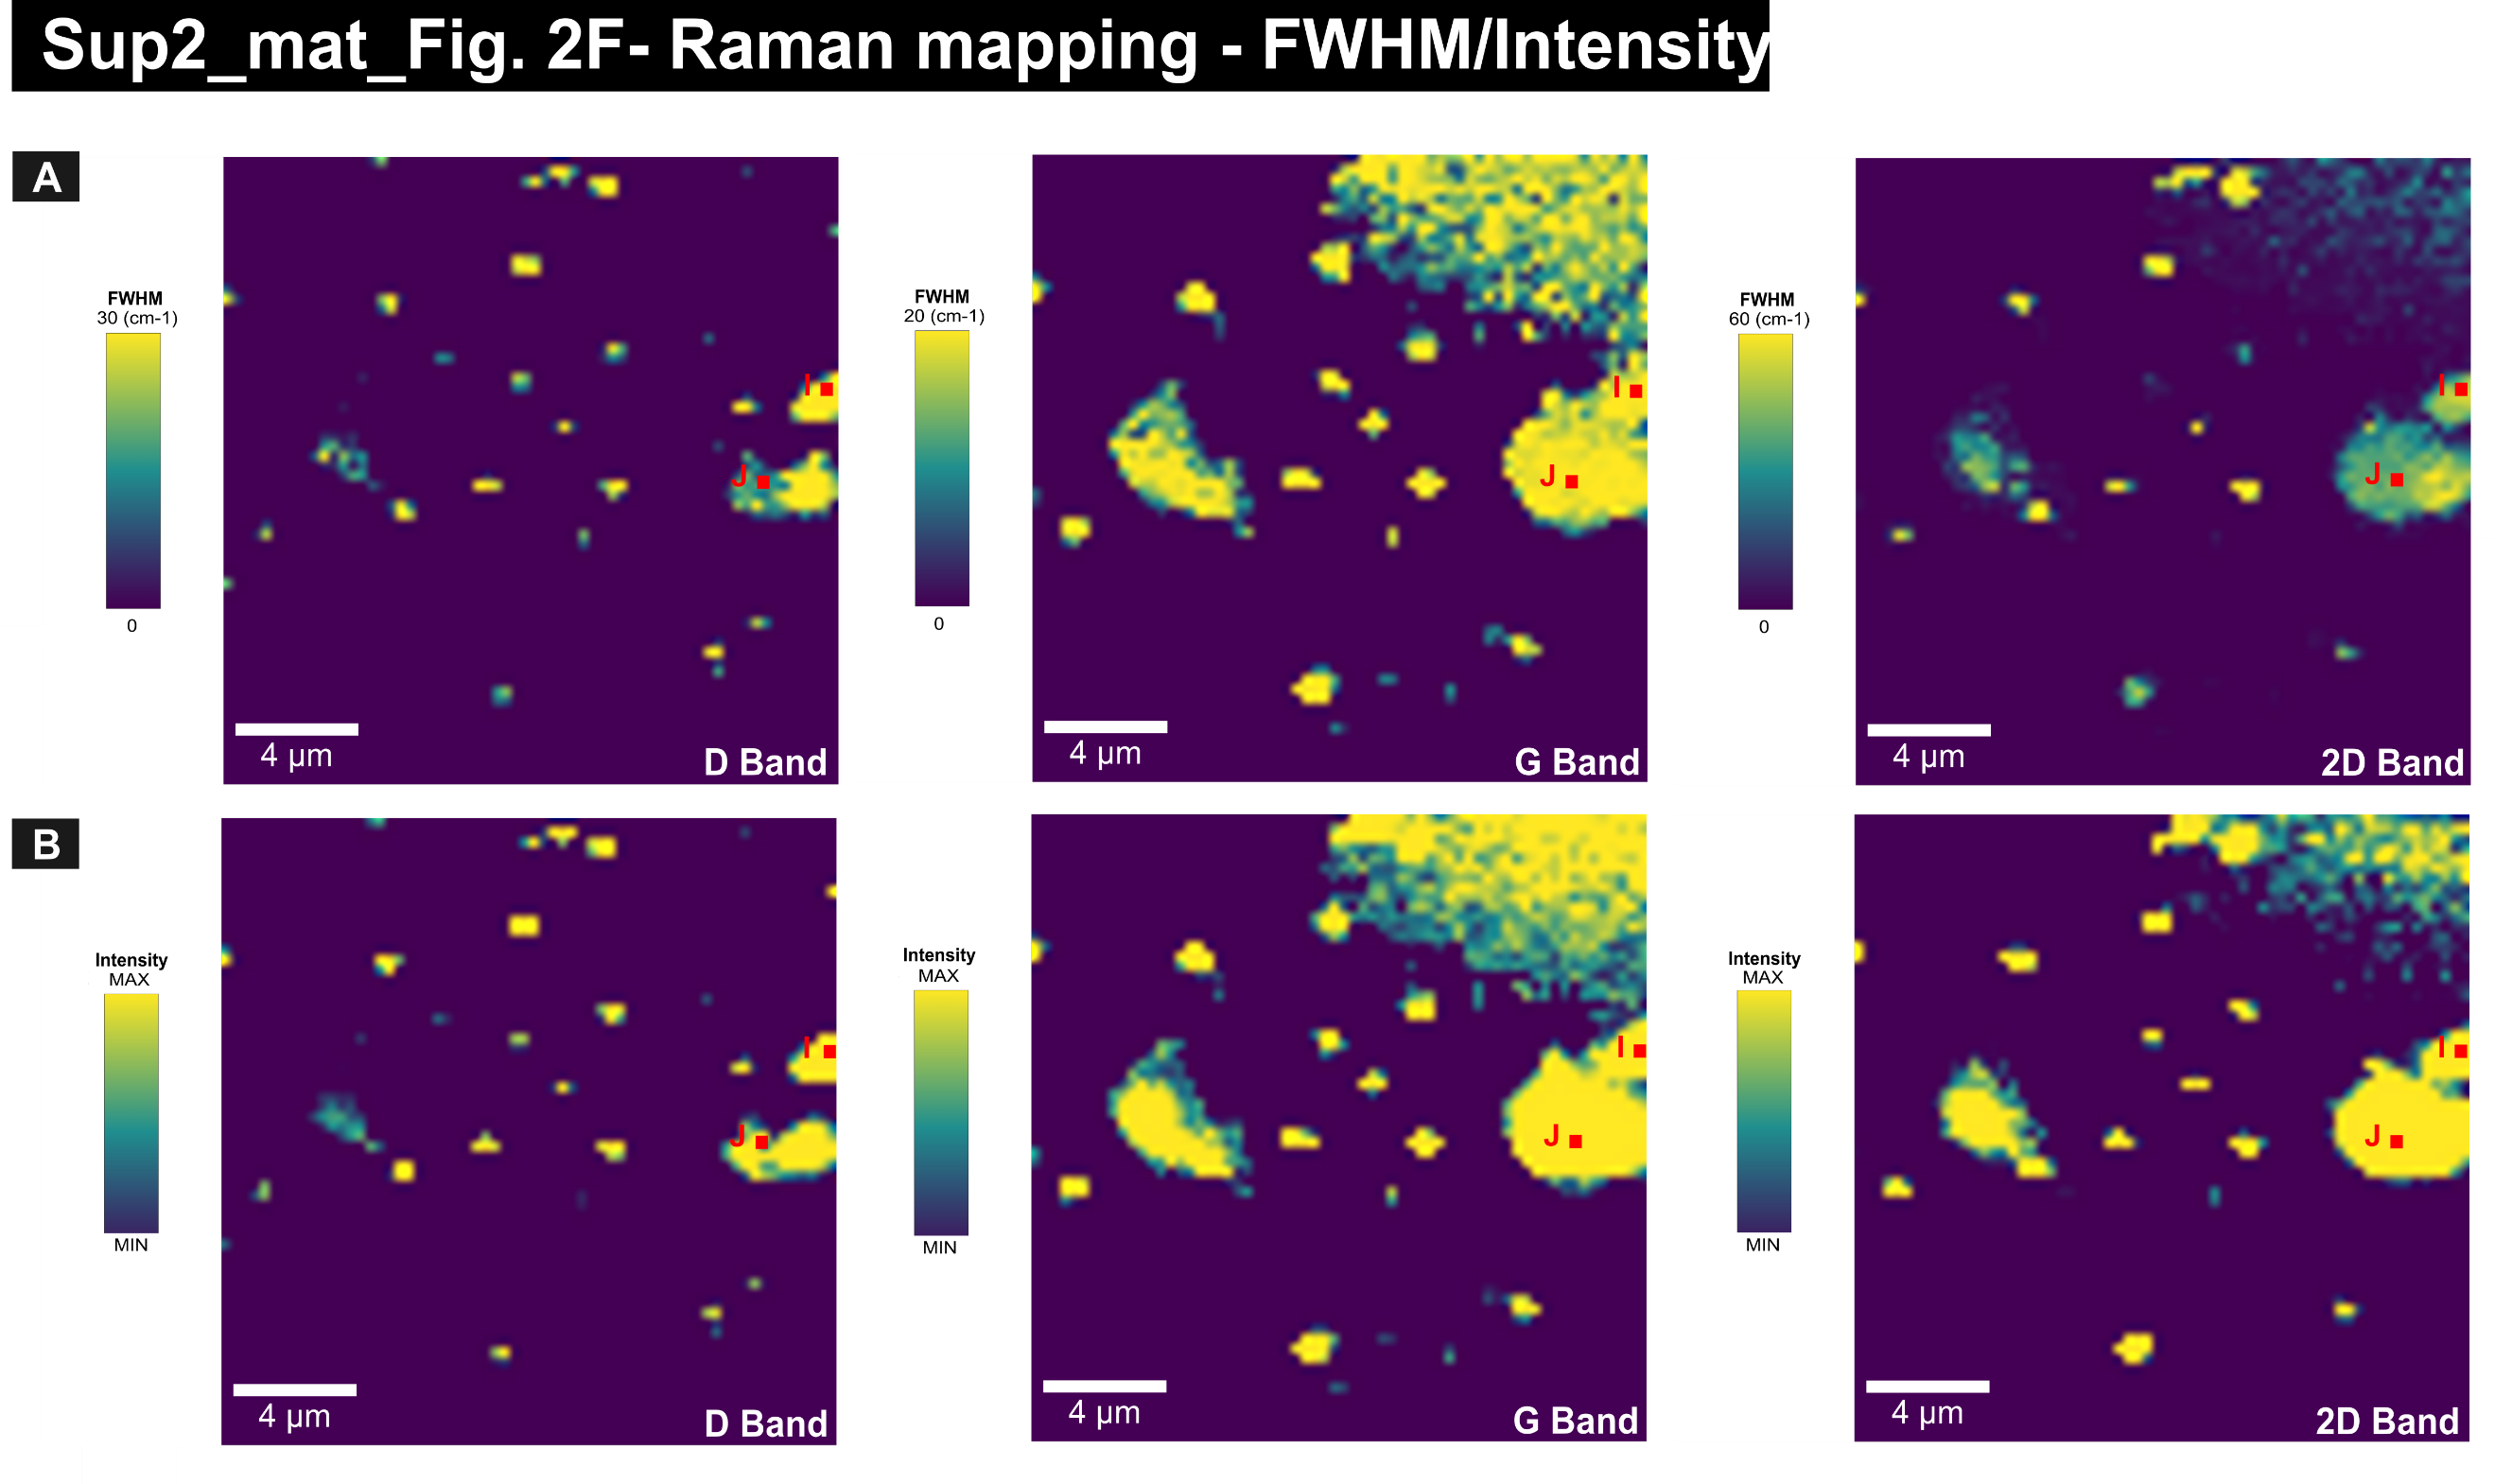


Supplementary Figure 4: Supplementary material related to Figure 2E: Raman mapping. (A) FWHM; and (B) Intensity.


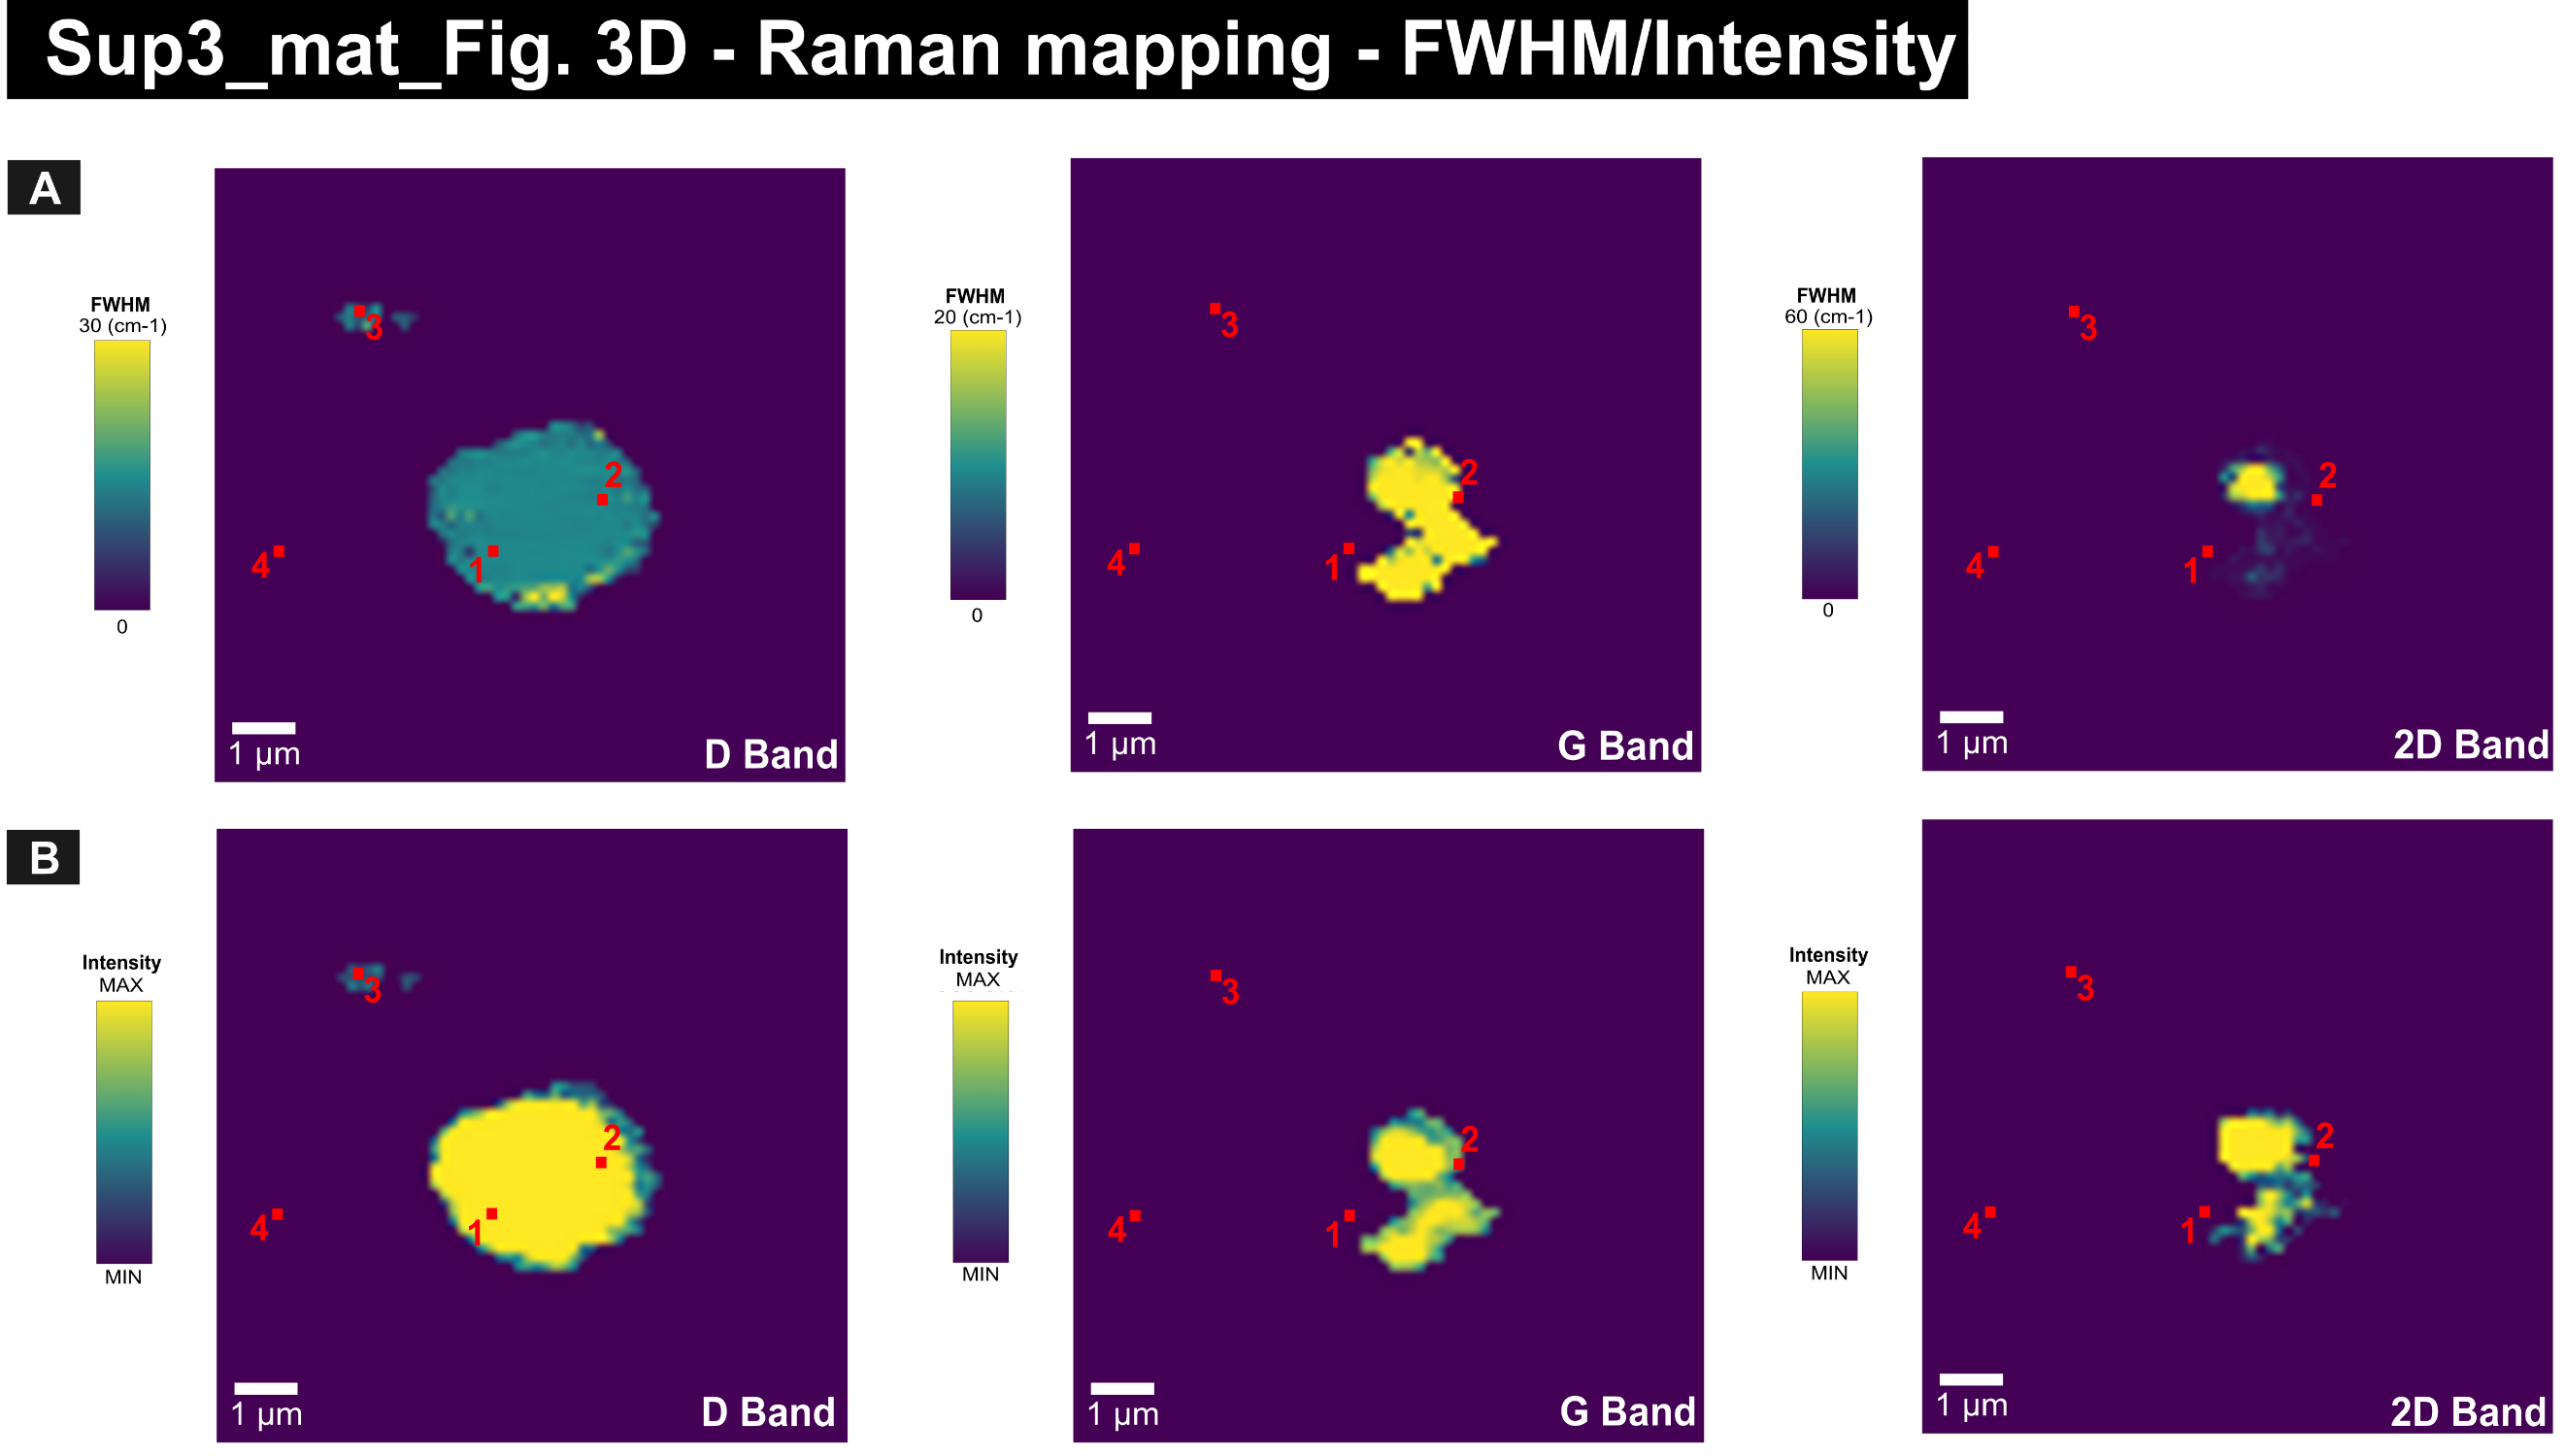


Supplementary Figure 5: Supplementary material related to Figure 3D: Raman mapping. (A) FWHM; and (B) Intensity.


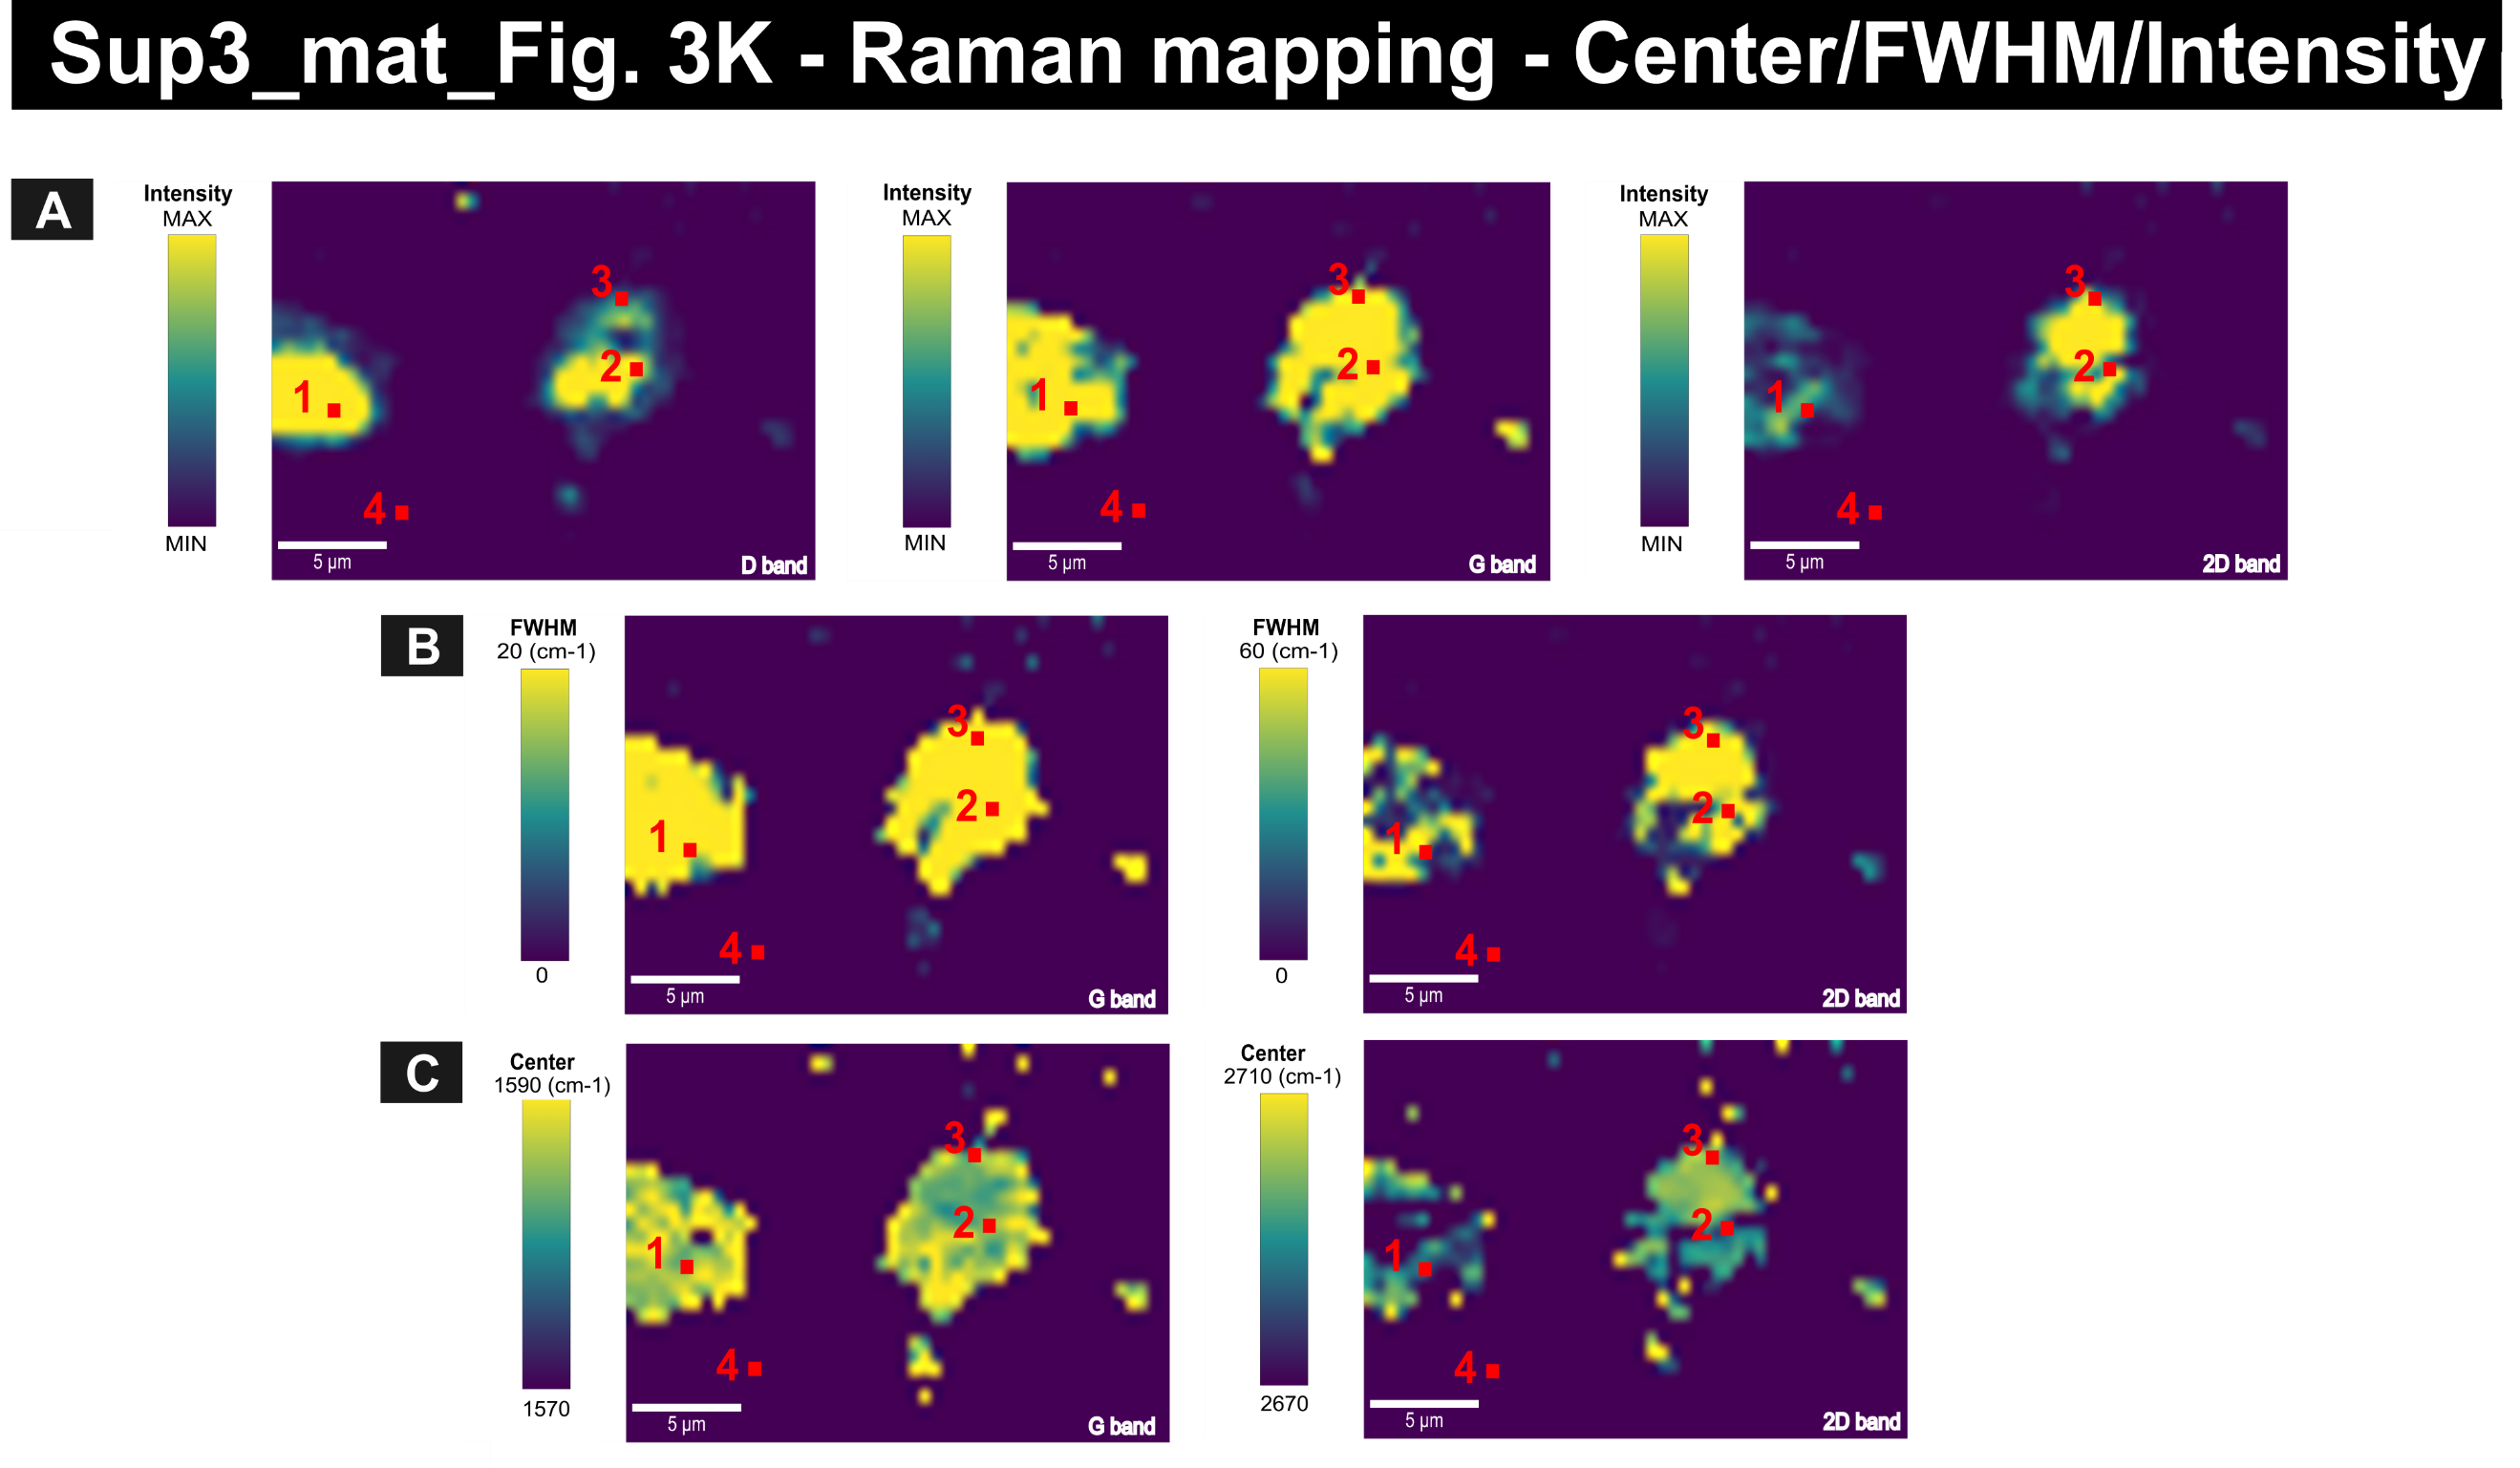


Supplementary Figure 6: Supplementary material related to Figure 3K: Raman mapping. (A) Intensity; (B) FWHM; and (C) Position.
