# Supplementary material for: Deep carbon cycle and early Earth´s oxygenation: evidence from ultra-high-pressure metamorphic rocks
Source: Research Square preprint supplement (doi:10.21203/rs.3.rs-6229822/v1), 2025-03-25
Supplement: Supplementary file 2 [file 46b09ec3b4351c644312c64e.xlsx]

## Sheet: Garnet 3M_3N
Sample	Petrology	Analysis	CR	Na2O	F	SiO2	Al2O3	MgO	BaO	CaO	FeO	Cl	Cr2O3	P2O5	TiO2	K2O	MnO	SrO	Total
100-29B_C1_01_Grt-1	Gr-pelitic gneiss	5	Core	0.061	0	38.324	21.057	4.802	0.045	1.29	31.492	0	0.065	0	0.007	0	2	0	99.143		C1
100-29B_C1_01_Grt-2	Gr-pelitic gneiss	4	Core	0.077	0	38.012	21.285	4.757	0.025	1.29	31.263	0	0.041	0	0.019	0	2.12	0	98.889
	Gr-pelitic gneiss	C1	C1 core	0.069	0	38.168	21.171	4.7795	0.035	1.29	31.3775	0	0.053	0	0.013	0	2.06	0	99.016
100-29B_C1_01_Grt-3	Gr-pelitic gneiss	3	Rim	0.035	0	38.003	21.198	4.198	0.051	1.299	31.958	0.003	0.051	0.087	0.015	0.004	2.497	0	99.398
100-29B_C1_01_Grt-4	Gr-pelitic gneiss	6	Rim	0.026	0	39.031	20.987	4.195	0	1.291	31.261	0.008	0.047	0	0.006	0.003	2.514	0	99.367
100-29B_C1_01_Grt-5	Gr-pelitic gneiss	2	Rim	0.043	0	38.135	21.286	4.105	0	1.399	32.232	0.015	0.056	0.016	0.004	0	2.6	0	99.888
100-29B_C1_01_Grt-6	Gr-pelitic gneiss	7	Rim	0.063	0	38.286	21.394	4.061	0.036	1.328	31.55	0.004	0.058	0	0	0	2.567	0	99.346
100-29B_C1_01_Grt-7	Gr-pelitic gneiss	8	Rim	0.06	0.069	39.094	21.21	4.014	0.055	1.205	31.202	0.01	0.06	0.069	0	0	2.659	0	99.676
100-29B_C1_01_Grt-8	Gr-pelitic gneiss	1	Rim	0.034	0	37.829	21.354	3.966	0.011	1.464	32.783	0.005	0.041	0.022	0.021	0.012	2.603	0	100.144
	Gr-pelitic gneiss	C1	C1 rim	0.0435	0.0115	38.3963	21.2382	4.08983	0.0255	1.331	31.831	0.0075	0.0521667	0.0323333	0.00766667	0.00316667	2.57333	0	99.6365
100-29B_C2_01_Grt-1	Gr-pelitic gneiss	31	Core	0	0.05	38.624	21.373	6.552	0	1.055	30.033	0	0.034	0.052	0	0	1.603	0	99.355
100-29B_C2_01_Grt-2	Gr-pelitic gneiss	30	Core	0.014	0	38.564	21.469	6.475	0.026	1.257	29.996	0.004	0.028	0.052	0.011	0	1.604	0	99.499
100-29B_C2_01_Grt-3	Gr-pelitic gneiss	29	Core	0	0.083	38.396	21.55	6.335	0	1.277	29.893	0	0.028	0.013	0	0	1.654	0	99.194
100-29B_C2_01_Grt-4	Gr-pelitic gneiss	32	Core	0.004	0	38.58	21.503	6.072	0.032	1.037	30.562	0	0.039	0.011	0	0.006	1.612	0	99.458
	Gr-pelitic gneiss		C2 core	0.0045	0.03325	38.541	21.4737	6.3585	0.0145	1.1565	30.121	0.001	0.03225	0.032	0.00275	0.0015	1.61825	0	99.3765
100-29B_C2_01_Grt-5	Gr-pelitic gneiss	28	Rim	0.01	0	39.51	21.428	5.158	0.037	1.259	29.944	0	0.043	0.009	0.017	0	1.791	0	99.206
100-29B_C2_01_Grt-6	Gr-pelitic gneiss	33	Rim	0.035	0	39.205	21.319	4.963	0.019	1.153	30.212	0.003	0.086	0.023	0.029	0.016	2.227	0	99.289
100-29B_C2_01_Grt-7	Gr-pelitic gneiss	27	Rim	0.048	0.086	38.554	21.621	4.254	0.02	1.234	30.782	0.006	0.03	0	0.001	0.001	2.537	0	99.137
100-29B_C2_01_Grt-8	Gr-pelitic gneiss	34	Rim	0.014	0.032	38.62	21.939	4.007	0	1.347	30.929	0	0.038	0.04	0.005	0.001	2.522	0	99.481
	Gr-pelitic gneiss		C2 rim	0.02675	0.0295	38.9723	21.5767	4.5955	0.019	1.24825	30.4668	0.00225	0.04925	0.018	0.013	0.0045	2.26925	0	99.2782
100-29B_C3_01_Grt-1	Gr-pelitic gneiss	44	Core	0.047	0.085	39.25	21.736	6.802	0.046	1.316	28.581	0.008	0.067	0	0	0	1.628	0	99.528
100-29B_C3_01_Grt-2	Gr-pelitic gneiss	43	Core	0.052	0	38.765	21.424	6.39	0.031	1.469	29.405	0.012	0.082	0.014	0.015	0.018	1.535	0	99.209
100-29B_C3_01_Grt-3	Gr-pelitic gneiss	45	Core	0.07	0	39.41	21.227	5.97	0.076	1.359	29.387	0.003	0.103	0.043	0.007	0	1.748	0	99.402		C2
100-29B_C3_01_Grt-4	Gr-pelitic gneiss	42	Core	0.054	0.036	39.508	21.025	5.308	0.026	1.262	29.802	0.01	0.026	0.027	0.01	0.004	1.939	0	99.02
	Gr-pelitic gneiss		C3 core	0.05575	0.03025	39.2332	21.353	6.1175	0.04475	1.3515	29.2938	0.00825	0.0695	0.021	0.008	0.0055	1.7125	0	99.2897
100-29B_C3_01_Grt-5	Gr-pelitic gneiss	46	Rim	0.053	0	39.664	21.25	5.645	0.003	1.412	29.231	0.004	0.08	0.024	0	0.007	1.797	0	99.169
100-29B_C3_01_Grt-6	Gr-pelitic gneiss	41	Rim	0.039	0.027	38.328	21.195	4.943	0.037	1.381	31.209	0.002	0.006	0.017	0.017	0	1.839	0	99.029
100-29B_C3_01_Grt-7	Gr-pelitic gneiss	39	Rim	0.061	0.058	38.564	21.096	4.415	0.032	1.349	30.952	0.004	0.055	0.011	0.016	0	2.464	0	99.052
100-29B_C3_01_Grt-8	Gr-pelitic gneiss	40	Rim	0.047	0.026	39.19	21.192	4.353	0.008	1.395	31.026	0.021	0.053	0	0.016	0.006	2.285	0	99.602
100-29B_C3_01_Grt-9	Gr-pelitic gneiss	47	Rim	0.002	0.033	39.331	21.074	4.321	0.023	1.268	30.498	0.003	0.065	0.029	0.023	0	2.453	0	99.108
	Gr-pelitic gneiss		C3 rim	0.0404	0.0288	39.0154	21.1614	4.7354	0.0206	1.361	30.5832	0.0068	0.0518	0.0162	0.0144	0.0026	2.1676	0	99.192
100-29B_C4_01_Grt-1	Gr-pelitic gneiss	59	Core	0.057	0.027	39.427	21.166	5.271	0.043	1.014	30.017	0.009	0.085	0.032	0.013	0.002	1.998	0	99.148
100-29B_C4_01_Grt-2	Gr-pelitic gneiss	57	Core	0.02	0	39.272	21.133	5.13	0.012	1.148	31.217	0	0.037	0.021	0.003	0	1.888	0	99.881
100-29B_C4_01_Grt-3	Gr-pelitic gneiss	58	Core	0.032	0.002	39.075	21.173	4.664	0.029	1.167	31.035	0.002	0.031	0.033	0.006	0.002	2.302	0	99.552
	Gr-pelitic gneiss		C4 core	0.0363333	0.00966667	39.258	21.1573	5.02167	0.028	1.10967	30.7563	0.00366667	0.051	0.0286667	0.00733333	0.00133333	2.06267	0	99.527
100-29B_C4_01_Grt-4	Gr-pelitic gneiss	56	Rim	0	0	39.796	21.131	5.107	0.033	1.386	30.299	0.004	0.021	0.01	0	0	1.949	0	99.735
100-29B_C4_01_Grt-5	Gr-pelitic gneiss	60	Rim	0.087	0.04	39.474	21.296	5.002	0	0.94	30.835	0.025	0.052	0.013	0.021	0.009	2.213	0	99.984
100-29B_C4_01_Grt-6	Gr-pelitic gneiss	55	Rim	0.06	0	38.952	21.189	4.795	0.025	1.293	31.428	0.008	0.074	0.053	0	0.014	2.195	0	100.084
100-29B_C4_01_Grt-7	Gr-pelitic gneiss	61	Rim	0.005	0.08	38.686	21.004	4.248	0.058	1.098	31.252	0.009	0.03	0.043	0.017	0	2.782	0	99.276
100-29B_C4_01_Grt-8	Gr-pelitic gneiss	54	Rim	0.046	0.054	39.181	21.151	4.011	0.043	1.197	31.478	0.005	0.033	0.052	0.001	0.007	2.716	0	99.951
	Gr-pelitic gneiss		C4 rim	0.0396	0.0348	39.2178	21.1542	4.6326	0.0318	1.1828	31.0584	0.0102	0.042	0.0342	0.0078	0.006	2.371	0	99.806
																					C3
																					C4

## Sheet: apfu
Sample	[SiO2	TiO2	ZrO2	HfO2	ThO2	SnO2	Al2O3	Cr2O3	V2O3	Fe2O3	Mn2O3	Sc2O3	Y2O3+REE2O3	FeO	MgO	MnO	ZnO	CaO	Na2O	Li2O	P2O5	V2O5	Sb2O5	As2O5	Nb2O5	UO3	TeO3	F	O=F	H2O	Total]wt%		[FeO(c)	Fe2O3(c)	MnO(c)	Mn2O3(c)]wt%		[Si	Ti	Zr	Hf	Th	Sn	Al	Cr	V+3	Fe3+	Mn3+	Sc
C1 core	38.168	0.013	0	0	0	0	21.171	0.053	0	0	0	0	0	31.377	4.77	2.06	0	1.29	0.069	0	0	0	0	0	0	0	0	0	0	0	98.971		0	0	0	0		3.045	0.001	0	0	0	0	1.991	0.003	0	0	0	0
C1 rim	38.396	0.007	0	0	0	0	21.238	0.052	0	0	0	0	0	31.381	4.089	2.573	0	1.331	0.043	0	0.032	0	0	0	0	0	0	0.0115	-0.005	0	99.149		0	0	0	0		3.062	0	0	0	0	0	1.996	0.003	0	0	0	0
C2 core	38.541	0.002	0	0	0	0	21.473	0.032	0	0	0	0	0	30.121	6.358	1.618	0	1.156	0.004	0	0.032	0	0	0	0	0	0	0.033	-0.014	0	99.356		0	0	0	0		3.033	0	0	0	0	0	1.992	0.002	0	0	0	0
C2 rim	38.972	0.013	0	0	0	0	21.576	0.049	0	0	0	0	0	30.466	4.595	2.269	0	1.248	0.026	0	0.018	0	0	0	0	0	0	0.029	-0.012	0	99.249		0	0	0	0		3.08	0.001	0	0	0	0	2.009	0.003	0	0	0	0
C3 core	39.233	0.008	0	0	0	0	21.253	0.069	0	0	0	0	0	30.121	6.117	1.712	0	1.351	0.055	0	0.021	0	0	0	0	0	0	0.03	-0.013	0	99.957		0	0	0	0		3.067	0	0	0	0	0	1.958	0.004	0	0	0	0
C3 rim	39.015	0.014	0	0	0	0	21.161	0.051	0	0	0	0	0	30.466	4.735	2.176	0	1.361	0.04	0	0.016	0	0	0	0	0	0	0.028	-0.012	0	99.051		0	0	0	0		3.091	0.001	0	0	0	0	1.976	0.003	0	0	0	0
C4core	39.258	0.007	0	0	0	0	21.157	0.051	0	0	0	0	0	29.293	5.021	2.062	0	1.109	0.036	0	0.028	0	0	0	0	0	0	0.009	-0.004	0	98.027		0	0	0	0		3.12	0	0	0	0	0	1.981	0.003	0	0	0	0
C4 rim	39.217	0.007	0	0	0	0	21.154	0.042	0	0	0	0	0	30.583	4.632	2.371	0	1.182	0.039	0	0.034	0	0	0	0	0	0	0.039	-0.016	0	99.284		0	0	0	0		3.1	0	0	0	0	0	1.971	0.003	0	0	0	0
[truncated: 85 more columns]

## Sheet: Ternary diagram Garnet 3M_3N
Sample	Petrology	Symbol	Colour	Na2O	F	SiO2	Al2O3	MgO	BaO	CaO	FeO	Cl	Cr2O3	P2O5	TiO2	K2O	MnO	SrO	Total	XFe	XMg	XMn	XCa
100-29B_C1 core	Gr-Pelitic Gneiss	1	1	0.069	0	38.168	21.171	4.7795	0.035	1.29	31.3775	0	0.053	0	0.013	0	2.06	0	99.016	2.094	0.567	0.139	0.11
100-29B_C2 core	Gr-Pelitic Gneiss	1	1	0.0045	0.03325	38.541	21.4737	6.3585	0.0145	1.1565	30.121	0.001	0.03225	0.032	0.00275	0.0015	1.61825	0	99.3765	1.982	0.746	0.108	0.097
100-29B_C3 core	Gr-Pelitic Gneiss	1	1	0.05575	0.03025	39.2332	21.353	6.1175	0.04475	1.3515	29.2938	0.00825	0.0695	0.021	0.008	0.0055	1.7125	0	99.2897	1.969	0.713	0.113	0.113
100-29B_C4 core	Gr-Pelitic Gneiss	1	1	0.0430833	0.0211667	38.6474	21.3326	5.75183	0.0314167	1.266	30.2641	0.00308333	0.0515833	0.0176667	0.00791667	0.00233333	1.79692	0	99.2274	1.947	0.595	0.139	0.094
100-29B_C1 rim	Gr-Pelitic Gneiss	1	1	0.0435	0.0115	38.3963	21.2382	4.08983	0.0255	1.331	31.831	0.0075	0.0521667	0.0323333	0.00766667	0.00316667	2.57333	0	99.6365	2.093	0.486	0.174	0.114
100-29B_C2 rim	Gr-Pelitic Gneiss	1	1	0.0367083	0.0240417	38.7045	21.3494	5.57942	0.0290417	1.27625	30.3775	0.00495833	0.051375	0.02575	0.00658333	0.003125	1.92525	0	99.3825	2.013	0.541	0.152	0.106
100-29B_C3 rim	Gr-Pelitic Gneiss	1	1	0.0367083	0.0240417	38.7045	21.3494	5.57942	0.0290417	1.27625	30.3775	0.00495833	0.051375	0.02575	0.00658333	0.003125	1.92525	0	99.3825	2,0,18	0.559	0.146	0.116
100-29B_C4 rim	Gr-Pelitic Gneiss	1	1	0.0396	0.0348	39.2178	21.1542	4.6326	0.0318	1.1828	31.0584	0.0102	0.042	0.0342	0.0078	0.006	2.371	0	99.806	2.022	0.546	0.159	0.1

## Sheet: Siegenite 2A
No.	Au	Se	As	Te	Sb	U	Co	Ag	Fe	S	V	P	Cu	Ni	Cd	Bi	Hg	Ti	Zn	Sn	Pd	Mn	Mo	Pt	Total
65	0.045	0.07	0	0.107	0.012	0	26.165	0	8.055	42.979	0	0	0.016	21.162	0	0.097	0.142	0	0	0.004	0.014	0.311	0	0.001	99.18	Siegenite
66	0	0.013	0.015	0.07	0	0	26.99	0.015	8.385	42.49	0.004	0.003	0.044	21.278	0.014	0.093	0	0	0	0	0	0.202	0	0.046	99.662	Siegenite
67	0.019	0.034	0.009	0.068	0	0	2.111	0	4.689	10.99	0	0.004	0.137	8.094	0.004	0.044	0.029	0	0.017	0	0.002	0.161	0	0	26.412	Siegenite+Graphite
68	0	0	0.048	0.04	0	0.003	11.466	0	1.358	21.767	0.017	0.017	0.757	16.329	0.016	0.064	0	0	0.028	0.029	0	0.419	0	0	52.358	Siegenite+Graphite
69	0.079	0.011	0	0.072	0	0.004	3.621	0	8.821	20.087	0	0.007	0.064	14.957	0.002	0	0.085	0.006	0.004	0	0.008	0.477	0	0	48.305	Siegenite+Graphite
										XNi	XFe	XCo	SUM	Formula
										1.13031	0.437847	1.41528	2.98343	Co(1,41)Ni(1,13)Fe(0,43)S4

## Sheet: Cobaltite 2C
No.	Au	Se	As	Te	Sb	U	Co	Ag	Fe	S	V	P	Cu	Ni	Cd	Bi	Hg	Ti	Zn	Sn	Pd	Mn	Mo	Pt	Total
38	0	0.156	45.707	0.046	0.036	0	23.204	0	1.021	19.758	0	0.001	0.014	8.203	0.005	0	0.087	0.003	0.007	0	0.009	1.725	0	0	99.982	Cobaltite
											Ni	Fe	Co	SUM		Formula
											0.253254	0.0315332	0.716523	1.00131		Co(0,71)Ni(0,25)Fe(0,03)AsS
