# Supplementary material for: Deep carbon cycle and early Earth´s oxygenation: evidence from ultra-high-pressure metamorphic rocks
Source: Research Square preprint supplement (doi:10.21203/rs.3.rs-6229822/v1), 2025-03-25
Supplement: Supplementary file 3 [file b075b79bf3d754640e10c688.xlsx]

## Sheet: Raman thermometry
Table 1
Sample		Gcenter	GFWHM	Garea	D1 area	D2 area	R2(D1/(G+D1+D2)area ratio)	Estimated temperature (TºC) - Beyssac et al (2002)	Correction factor (T corrected = R2 area ratio/ ζstrain) (Barzoi, 2005)
Mn-silicate ore	10046 2B	1581	50	0.0034	0.10119	0	0.967492	200.791	286.844
	10247 2D	1567	99	0.00911	0.05214	0	0.851265	253.674	362.392
Gondite	10055 2I	1580	14.197	0.0055	0.0038	0.00064	0.382294	467.056	667.223
	10055 2J	1579	19	0.0031	0.00033	0	0.0962099	597.224	853.178
Graphitic pelitic gneiss	10029 3L	1580	14	0.00405955	0.0012975	0.000274393	0.230403	536.167	765.952

## Sheet: 10046 Siegenite
rel. 1/cm	CCD cts
-72.4	736
-69.5	745
-66.5	766
-63.5	767
-60.6	809
-57.6	820
-54.6	848
-51.7	847
-48.7	883
-45.8	910
-42.8	986
-39.8	1110
-36.9	1480
-33.9	2590
-31	5740
-28	13100
-25.1	20200
-22.1	26900
-19.2	33900
-16.2	35100
-13.3	32000
-10.3	30200
-7.39	31600
-4.45	35600
-1.5	29500
1.44	27500
4.38	23400
7.32	25100
10.3	24300
13.2	16400
16.1	6390
19.1	1930
22	1080
25	959
27.9	886
30.8	849
33.8	841
36.7	862
39.6	813
42.5	808
45.5	821
48.4	839
51.3	898
54.3	1160
57.2	1700
60.1	2490
63	3760
65.9	5230
68.9	7280
71.8	9000
74.7	9720
77.6	10600
80.5	10800
83.5	10700
86.4	10100
89.3	9890
92.2	9840
95.1	9980
98	9980
101	9920
104	9770
107	9570
110	9670
113	10100
115	10100
118	9920
121	10200
124	10400
127	10500
130	10700
133	11000
136	11300
139	11400
142	11400
144	10600
147	9950
150	9910
153	9750
156	9870
159	10200
162	10200
165	10100
168	9680
170	9520
173	9390
176	9440
179	9610
182	9740
185	9870
188	10100
191	9790
194	9660
196	9480
199	9710
202	9560
205	10100
208	10400
211	10500
214	10800
217	10500
219	10200
222	10400
225	11000
228	11300
231	11200
234	11200
237	11600
240	10900
242	10700
245	10500
248	9970
251	10200
254	10200
257	9950
260	10200
262	10400
265	10400
268	10700
271	10600
274	10600
277	10500
280	10500
282	10700
285	11200
288	11600
291	11800
294	12000
297	11900
299	11300
302	11000
305	10500
308	10400
311	11000
314	10900
317	10500
319	10300
322	10400
325	10800
328	11500
331	12100
334	11700
336	11400
339	11500
342	12000
345	12000
348	11900
351	11000
353	10500
356	10500
359	10600
362	11300
365	11700
367	11300
370	11500
373	11700
376	11400
379	10900
382	10300
384	9680
387	9570
390	9630
393	9460
396	9410
398	9800
401	10100
404	10100
407	10100
410	10200
413	10100
415	9750
418	9720
421	9190
424	9720
427	10600
429	10500
432	9930
435	9720
438	9690
441	10200
443	10500
446	10200
449	9730
452	9650
455	10100
457	10600
460	10400
463	10100
466	10700
469	10600
471	9710
474	9770
477	10800
480	10700
482	10600
485	10400
488	10400
491	10200
494	10300
496	10900
499	11100
502	11000
505	10800
508	11000
510	10800
513	10800
516	10900
519	10700
521	10500
524	11200
527	11700
530	11300
532	11000
535	11000
538	11100
541	10900
544	11000
546	10800
549	11000
552	11300
555	11100
557	11300
560	11400
563	11000
566	10500
568	10300
571	10500
574	10600
577	10600
579	10800
582	10500
585	10200
588	10500
590	10600
593	10800
596	10100
599	9620
601	9900
604	10000
607	9950
610	9770
612	10000
615	10600
618	10600
621	10200
623	10200
626	9690
629	9720
632	10000
634	10200
637	10400
640	10000
643	10200
645	9900
648	9480
651	10100
654	10500
656	10900
659	10300
662	9630
664	9660
667	9740
670	9880
673	10100
675	9900
678	9430
681	9770
684	9640
686	9210
689	9210
692	8830
694	9000
697	8520
700	8530
703	8900
705	8950
708	8880
711	8130
713	8090
716	8320
719	8690
722	8410
724	8290
727	8640
730	8740
732	8470
735	8470
738	8450
740	8660
743	8690
746	8240
749	7980
751	8450
754	8530
757	8530
759	8340
762	8450
765	8450
767	8500
770	8280
773	7940
776	7740
778	8080
781	8310
784	8330
786	8180
789	8040
792	7770
794	7690
797	8300
800	8730
802	8200
805	8020
808	8020
810	7960
813	7810
816	8310
819	8240
821	7980
824	8020
827	8060
829	8180
832	8480
835	8050
837	7410
840	7470
843	7880
845	7780
848	7950
851	7790
853	7860
856	8280
859	8470
861	8150
864	8040
867	7960
869	7890
872	8210
875	8430
877	8520
880	8000
883	8210
885	8400
888	8350
891	7990
893	7980
896	8030
898	8340
901	8450
904	8570
906	8510
909	8290
912	7980
914	8260
917	8360
920	8270
922	8290
925	7890
928	7960
930	8390
933	8560
936	8240
938	8120
941	8220
943	8380
946	8610
949	8370
951	8550
954	8840
957	8670
959	8880
962	8750
965	8570
967	8390
970	8540
972	8640
975	8920
978	9040
980	8730
983	9000
986	9040
988	8820
991	8840
993	8950
996	9210
999	9510
1000	9170
1000	8920
1010	9170
1010	9210
1010	9100
1010	9140
1020	9180
1020	9150
1020	9000
1020	9290
1030	9260
1030	8830
1030	9000
1040	9010
1040	9020
1040	9120
1040	9140
1050	9380
1050	9560
1050	9470
1050	9470
1060	9770
1060	10000
1060	9570
1060	9530
1070	9380
1070	9570
1070	9720
1070	9910
1080	9810
1080	9620
1080	9640
1080	9610
1090	9620
1090	9980
1090	10100
1100	10100
1100	10600
1100	10600
1100	10100
1110	9950
1110	10200
1110	10500
1110	9940
1120	9420
1120	9780
1120	10200
1120	9810
1130	9900
1130	10700
1130	10700
1130	10300
1140	10200
1140	9830
1140	10300
1140	10400
1150	10500
1150	10200
1150	10300
1150	10400
1160	10400
1160	10500
1160	10600
1160	10600
1170	11000
1170	11000
1170	11400
1180	11100
1180	10600
1180	10800
1180	11000
1190	11100
1190	11400
1190	11400
1190	11300
1200	11500
1200	11900
1200	12000
1200	11700
1210	11200
1210	11500
1210	11600
1210	11700
1220	12300
1220	12500
1220	12400
1220	12300
1230	11800
1230	11500
1230	11800
1230	12100
1240	12300
1240	12300
1240	12200
1240	12000
1250	12200
1250	12400
1250	12300
1250	12500
1260	12700
1260	12900
1260	12600
1260	12600
1270	12600
1270	12700
1270	12700
1270	12900
1280	13200
1280	13100
1280	13500
1280	14100
1290	14200
1290	14300
1290	14700
1290	14600
1300	14000
1300	13900
1300	13900
1310	13900
1310	14400
1310	14800
1310	15000
1320	14900
1320	15000
1320	14400
1320	14000
1330	14200
1330	14500
1330	14600
1330	14800
1340	15100
1340	15500
1340	14800
1340	14500
1350	14200
1350	13700
1350	13800
1350	14600
1360	14600
1360	14500
1360	14700
1360	14500
1370	14000
1370	13800
1370	13800
1370	14000
1380	13900
1380	13700
1380	13400
1380	13500
1390	13400
1390	13100
1390	13200
1390	13500
1400	13500
1400	13600
1400	13400
1400	13100
1410	13000
1410	13000
1410	12800
1410	12600
1420	12800
1420	12800
1420	13200
1420	13000
1430	12400
1430	11900
1430	12100
1430	12200
1440	11700
1440	11800
1440	11900
1440	12100
1450	12000
1450	11800
1450	11900
1450	12000
1460	12100
1460	12100
1460	12000
1460	11900
1470	11700
1470	11700
1470	11900
1470	12600
1480	12700
1480	12300
1480	11800
1480	11100
1480	11000
1490	11400
1490	12200
1490	12900
1490	12700
1500	12300
1500	12000
1500	12200
1500	12000
1510	12100
1510	12200
1510	12300
1510	12800
1520	12500
1520	12700
1520	12700
1520	12600
1530	12500
1530	12700
1530	12800
1530	13000
1540	13200
1540	13100
1540	13600
1540	13900
1550	14800
1550	15000
1550	14900
1550	15200
1560	15200
1560	14900
1560	14800
1560	15000
1570	15500
1570	16100
1570	16100
1570	15700
1580	14900
1580	14800
1580	14700
1580	14700
1590	14800
1590	15000
1590	15200
1590	14500
1600	14400
1600	14200
1600	14100
1600	14000
1610	13500
1610	13200
1610	13100
1610	12500
1610	11900
1620	11900
1620	11700
1620	11200
1620	10700
1630	10400
1630	10400
1630	10200
1630	10100
1640	9930
1640	9820
1640	9680
1640	9410
1650	9360
1650	9240
1650	9210
1650	8830
1660	8580
1660	8520
1660	8400
1660	8570
1670	8380
1670	8440
1670	8520
1670	8570
1680	8550
1680	8500
1680	8020
1680	7750
1690	7810
1690	7990
1690	8260
1690	8300
1690	7990
1700	7870
1700	7500
1700	7690
1700	7700
1710	8190
1710	8220
1710	7890
1710	7720
1720	7810
1720	7680
1720	7720
1720	7490
1730	7360
1730	7280
1730	7140
1730	7170
1740	7340
1740	7540
1740	7390
1740	7480
1750	7270
1750	6870
1750	6900
1750	7090
1750	7400
1760	7620
1760	7630
1760	7470
1760	7350
1770	7420
1770	7490
1770	7380
1770	7220
1780	7090
1780	7340
1780	7310
1780	7090
1790	7260
1790	7050
1790	7150
1790	7170
1800	7080
1800	7110
1800	7200
1800	7280
1800	7270
1810	7090
1810	6810
1810	6620
1810	6760
1820	6830
1820	7220
1820	7570
1820	7400
1830	6980
1830	6750
1830	6760
1830	6710
1840	6870
1840	7060
1840	6990
1840	7060
1840	7220
1850	7060
1850	6720
1850	7000
1850	7400
1860	7170
1860	6910
1860	6850
1860	7020
1870	7010
1870	6650
1870	6680
1870	6920
1880	6770
1880	6820
1880	6840
1880	6950
1890	7130
1890	7160
1890	7000
1890	6980
1890	7000
1900	7140
1900	7200
1900	7120
1900	7150
1910	6990
1910	6940
1910	6880
1910	7000
1920	7090
1920	7020
1920	6910
1920	6780
1920	6800
1930	6680
1930	6620
1930	6850
1930	7110
1940	7300
1940	7010
1940	6800
1940	6850
1950	6810
1950	6850
1950	7140
1950	7130
1960	7040
1960	6880
1960	6810
1960	6690
1960	6790
1970	6950
1970	7170
1970	7020
1970	6940
1980	6800
1980	6820
1980	6900
1980	6850
1990	6970
1990	7250
1990	7000
1990	6900
1990	7020
2000	6910
2000	6880
2000	6920
2000	6790
2010	6730
2010	6900
2010	6870
2010	6730
2020	6750
2020	6600
2020	6620
2020	6880
2020	6820
2030	6820
2030	7050
2030	7130
2030	7000
2040	6930
2040	6980
2040	7000
2040	6920
2050	6840
2050	6840
2050	7060
2050	6870
2050	6650
2060	6670
2060	6940
2060	7080
2060	7200
2070	7040
2070	6880
2070	6830
2070	6960
2080	6970
2080	6740
2080	6580
2080	6660
2080	6740
2090	7140
2090	7280
2090	7150
2090	7030
2100	6890
2100	6830
2100	6900
2100	6800
2110	6750
2110	6750
2110	6820
2110	6940
2110	7140
2120	7200
2120	7050
2120	7210
2120	7020
2130	6890
2130	6920
2130	6780
2130	6800
2130	6640
2140	6590
2140	6730
2140	6810
2140	6880
2150	6680
2150	6520
2150	6830
2150	6860
2160	6590
2160	6600
2160	6650
2160	6770
2160	6900
2170	7120
2170	7270
2170	7020
2170	6700
2180	6680
2180	6680
2180	6860
2180	7010
2180	7140
2190	7020
2190	6550
2190	6350
2190	6410
2200	6460
2200	6620
2200	6820
2200	6840
2200	6820
2210	6930
2210	7190
2210	7640
2210	7460
2220	7040
2220	6730
2220	6550
2220	6740
2230	6990
2230	7110
2230	7040
2230	7010
2230	7080
2240	7140
2240	7000
2240	6850
2240	6760
2250	6460
2250	6450
2250	6680
2250	7060
2250	7260
2260	7330
2260	7160
2260	6960
2260	6790
2270	6850
2270	6720
2270	6900
2270	6980
2270	6830
2280	6940
2280	6980
2280	6850
2280	6930
2290	6930
2290	7000
2290	6830
2290	6870
2290	7020
2300	7030
2300	6880
2300	6630
2300	6520
2310	6620
2310	6700
2310	6820
2310	6970
2310	6830
2320	6920
2320	6980
2320	6990
2320	7120
2330	7050
2330	7050
2330	7120
2330	7440
2330	7010
2340	6980
2340	7000
2340	6940
2340	7060
2350	7030
2350	6790
2350	6950
2350	7250
2350	7460
2360	7520
2360	7500
2360	7420
2360	7290
2370	7000
2370	7060
2370	6770
2370	6700
2370	6960
2380	7260
2380	7370
2380	7560
2380	7510
2390	7580
2390	7740
2390	7470
2390	7180
2390	7210
2400	7150
2400	6970
2400	6940
2400	7230
2410	7350
2410	7360
2410	7320
2410	7180
2410	7350
2420	7300
2420	7260
2420	7190
2420	7350
2420	7620
2430	7460
2430	7380
2430	7260
2430	7230
2440	7210
2440	7260
2440	7150
2440	7220
2440	7380
2450	7480
2450	7320
2450	7480
2450	7510
2460	7460
2460	7480
2460	7610
2460	7690
2460	7630
2470	7660
2470	7740
2470	7610
2470	7320
2480	7230
2480	7490
2480	7560
2480	7430
2480	7430
2490	7550
2490	7550
2490	7730
2490	7860
2490	7630
2500	7660
2500	7770
2500	7750
2500	7700
2510	7530
2510	7420
2510	7750
2510	7880
2510	7710
2520	7670
2520	7670
2520	7600
2520	7640
2530	7740
2530	7810
2530	7670
2530	7710
2530	7810
2540	7860
2540	7840
2540	7800
2540	7860
2540	8030
2550	8220
2550	8160
2550	8210
2550	7950
2560	7620
2560	7480
2560	7870
2560	7780
2560	7500
2570	7780
2570	8080
2570	8140
2570	8180
2570	8340
2580	8160
2580	7990
2580	8160
2580	8070
2590	8130
2590	8140
2590	7960
2590	7960
2590	8020
2600	7910
2600	8080
2600	8530
2600	8480
2600	8490
2610	8680
2610	8690
2610	8300
2610	8010
2620	7920
2620	7980
2620	8240
2620	8450
2620	8630
2630	9360
2630	8050
2630	8260
2630	8950
2630	8940
2640	8530
2640	8200
2640	7820
2640	7790
2650	8190
2650	8360
2650	8590
2650	8350
2650	8080
2660	7880
2660	8110
2660	8530
2660	8530
2660	8820
2670	8750
2670	8290
2670	8070
2670	8190
2670	8210
2680	8510
2680	8770
2680	8710
2680	8630
2690	8600
2690	8470
2690	8130
2690	8450
2690	8800
2700	8740
2700	8540
2700	8500
2700	8670
2700	8640
2710	8720
2710	8790
2710	8780
2710	8350
2710	8190
2720	8470
2720	8610
2720	8600
2720	8740
2730	8900
2730	8800
2730	8380
2730	7960
2730	8150
2740	8520
2740	8790
2740	8880
2740	8970
2740	9140
2750	8960
2750	8760
2750	8700
2750	8550
2750	8440
2760	8560
2760	8630
2760	8620
2760	8880
2770	8320
2770	8540
2770	8540
2770	8860
2770	8870
2780	8940
2780	8790
2780	8870
2780	8650
2780	8320
2790	8430
2790	8600
2790	9090
2790	9100
2790	8870
2800	8470
2800	8150
2800	7960
2800	8130
2800	8380
2810	8340
2810	8350
2810	8410
2810	8420
2820	8070
2820	7990
2820	8120
2820	8550
2820	8660
2830	8700
2830	8760
2830	8780
2830	8550
2830	8210
2840	8020
2840	8260
2840	8180
2840	8160
2840	8540
2850	8750
2850	8860
2850	8550
2850	7910
2850	7770
2860	7880
2860	8060
2860	8270
2860	8000
2870	7950
2870	8100
2870	8030
2870	7820
2870	7830
2880	7900
2880	8030
2880	8300
2880	8550
2880	8310
2890	8140
2890	8040
2890	8140
2890	8410
2890	8530
2900	8050
2900	7830
2900	7850
2900	8030
2900	7960
2910	7390
2910	7240
2910	7470
2910	8090
2910	8530
2920	8460
2920	8480
2920	8430
2920	8390
2920	8090
2930	8030
2930	7630
2930	7470
2930	7640
2930	7860
2940	7980
2940	8040
2940	7970
2940	7910
2950	7590
2950	7700
2950	7870
2950	7990
2950	7830
2960	7930
2960	7950
2960	7910
2960	7560
2960	7280
2970	7190
2970	7380
2970	7440
2970	7560
2970	7700
2980	7940
2980	7880
2980	7710
2980	7650
2980	7970
2990	8280
2990	8060
2990	7650
2990	7260
2990	7280
3000	7160
3000	7250
3000	7220
3000	7240
3000	7590
3010	7890
3010	7710
3010	7420
3010	7350
3010	7270
3020	7140
3020	7160
3020	7200
3020	7230
3020	7200
3030	7070
3030	6950
3030	7030
3030	7150
3030	7290
3040	7390
3040	7340
3040	7140
3040	7210
3040	7080
3050	7270
3050	7260
3050	7310
3050	7100
3050	6860
3060	7070
3060	6970
3060	6960
3060	7140
3060	7060
3070	7040
3070	7030
3070	6970
3070	6940
3070	6870
3080	6620
3080	6560
3080	6680
3080	6690
3080	6860
3090	6970
3090	6980
3090	6900
3090	6650
3090	6430
3100	6360
3100	6620
3100	6640
3100	6760
3100	6730
3110	6720
3110	6860
3110	7060
3110	6980
3110	6810
3120	6740
3120	6650
3120	6610
3120	6740
3120	6990
3130	6850
3130	6700
3130	6470
3130	6450
3130	6640
3140	6660
3140	6570
3140	6700
3140	6590
3140	6760
3150	6410
3150	6230
3150	6290
3150	6540
3150	6520
3160	6560
3160	6430
3160	6480
3160	6740
3160	6910
3170	6760
3170	6560
3170	6420
3170	6120
3170	6070
3180	6030
3180	6230
3180	6390
3180	6360
3180	6350
3190	6280
3190	6310
3190	6270
3190	6260
3190	6260
3200	6370
3200	6250
3200	6070
3200	5890
3200	5890
3210	6090
3210	6160
3210	6160
3210	6170
3210	6400
3220	6280
3220	6210
3220	6260
3220	6230
3220	6270
3230	6150
3230	6030
3230	5930
3230	5900
3230	5800
3230	5850
3240	5980
3240	6290
3240	6280
3240	5980
3240	5900
3250	5850
3250	5910
3250	5750
3250	5640
3250	5640
3260	5760
3260	5710
3260	5740
3260	5760
3260	5710
3270	5590
3270	5640
3270	5630
3270	5690
3270	5680
3280	5640
3280	5570
3280	5520
3280	5720
3280	5520
3290	5520
3290	5580
3290	5550
3290	5580
3290	5710
3300	5830
3300	5660
3300	5440
3300	5500
3300	5660
3310	5530
3310	5620
3310	5670
3310	5800
3310	5930
3310	5870
3320	5700
3320	5540
3320	5320
3320	5430
3320	5610
3330	5580
3330	5460
3330	5490
3330	5530
3330	5520
3340	5530
3340	5660
3340	5720
3340	5490
3340	5430
3350	5700
3350	5540
3350	5660
3350	5590
3350	5700
3360	5680
3360	5510
3360	5530
3360	5500
3360	5470
3360	5300
3370	5060
3370	5280
3370	5450
3370	5290
3370	5420
3380	5390
3380	5340
3380	5610
3380	5650
3380	5620
3390	5360
3390	5590
3390	5360
3390	5410
3390	5300
3400	5350
3400	5400
3400	5490
3400	5250
3400	5250
3410	5310
3410	5330
3410	5380
3410	5290
3410	5550
3410	5550
3420	5510
3420	5430
3420	5260
3420	5340
3420	5190
3430	5300
3430	5340
3430	5240
3430	5330
3430	5380
3440	5570
3440	5330
3440	5270
3440	5330
3440	5350
3450	5490
3450	5410
3450	5410
3450	5450
3450	5270
3450	5090
3460	5120
3460	5120
3460	5030
3460	5070
3460	5370
3470	5320
3470	5060
3470	4970
3470	5130
3470	5160
3480	5280
3480	5310
3480	5490
3480	5350
3480	5000
3480	4910
3490	5030
3490	5180
3490	5260
3490	5140
3490	5350
3500	5320
3500	5140
3500	5200
3500	5160
3500	5260
3510	5240
3510	5240
3510	5150
3510	5050
3510	5050
3520	4950
3520	4880
3520	4770
3520	4840
3520	4980
3520	5060
3530	5060
3530	5000
3530	5010
3530	4960
3530	4910
3540	5140
3540	5080
3540	5000
3540	4910
3540	4980
3550	5200
3550	5120
3550	5170
3550	5420
3550	5440
3550	5360
3560	5280
3560	5280
3560	5090
3560	4920
3560	5000
3570	5130
3570	5120
3570	5130
3570	4960
3570	5040
3580	5320
3580	5200
3580	5240
3580	5230
3580	5080
3580	5050
3590	5300
3590	5090
3590	5010
3590	5090
3590	5300
3600	5220
3600	5150
3600	5070
3600	4990
3600	5050
3600	5060
3610	5060
3610	5010
3610	5010
3610	5050
3610	5110
3620	5040
3620	5110
3620	5170
3620	5270
3620	5210
3630	5400
3630	5320
3630	5020
3630	4960
3630	5130
3630	5080
3640	5090
3640	4970
3640	4920
3640	5070
3640	5300
3650	5090
3650	4990
3650	4950
3650	5040
3650	5040
3650	5270
3660	5180
3660	5060
3660	4960
3660	5110
3660	7320
3670	4820
3670	5110
3670	5150
3670	4870
3670	4890
3670	4880
3680	5070
3680	5060
3680	5160
3680	5160
3680	5070
3690	4940
3690	5070
3690	4900
3690	4840
3690	4710
3700	4960
3700	5070
3700	5120
3700	5060
3700	5270
3700	5040
3710	4810
3710	4850
3710	4850
3710	4930
3710	4780
3720	5020
3720	5190
3720	5140
3720	5100
3720	4970
3720	4940
3730	4730
3730	4700
3730	4990
3730	5050
3730	4890
3740	4800
3740	4570
3740	4670
3740	4900
3740	4950
3740	5050
3750	4890
3750	4830
3750	5070
3750	4880
3750	4850
3760	4760
3760	4780
3760	5040
3760	4900

## Sheet: 10046 2B
rel. 1/cm	CCD cts
-7.24E+01	6.41E+02
-6.95E+01	6.39E+02
-6.65E+01	6.43E+02
-6.35E+01	6.47E+02
-6.06E+01	6.58E+02
-5.76E+01	6.42E+02
-5.46E+01	6.63E+02
-5.17E+01	6.61E+02
-4.87E+01	6.67E+02
-4.58E+01	6.63E+02
-4.28E+01	6.71E+02
-3.98E+01	6.86E+02
-3.69E+01	7.28E+02
-3.39E+01	8.52E+02
-3.10E+01	1.21E+03
-2.80E+01	1.87E+03
-2.51E+01	2.72E+03
-2.21E+01	3.18E+03
-1.92E+01	3.91E+03
-1.62E+01	4.18E+03
-1.33E+01	4.71E+03
-1.03E+01	4.29E+03
-7.39E+00	4.08E+03
-4.45E+00	3.52E+03
-1.50E+00	3.01E+03
1.44E+00	3.46E+03
4.38E+00	3.30E+03
7.32E+00	2.85E+03
1.03E+01	2.26E+03
1.32E+01	1.85E+03
1.61E+01	1.19E+03
1.91E+01	8.20E+02
2.20E+01	6.85E+02
2.50E+01	6.80E+02
2.79E+01	6.79E+02
3.08E+01	6.81E+02
3.38E+01	6.83E+02
3.67E+01	7.11E+02
3.96E+01	6.88E+02
4.25E+01	6.83E+02
4.55E+01	7.01E+02
4.84E+01	7.14E+02
5.13E+01	7.47E+02
5.43E+01	8.79E+02
5.72E+01	1.17E+03
6.01E+01	1.63E+03
6.30E+01	2.33E+03
6.59E+01	3.15E+03
6.89E+01	4.10E+03
7.18E+01	4.86E+03
7.47E+01	5.52E+03
7.76E+01	5.88E+03
8.05E+01	6.13E+03
8.35E+01	6.07E+03
8.64E+01	5.91E+03
8.93E+01	5.83E+03
9.22E+01	5.73E+03
9.51E+01	5.72E+03
9.80E+01	5.90E+03
1.01E+02	6.08E+03
1.04E+02	5.89E+03
1.07E+02	5.71E+03
1.10E+02	5.71E+03
1.13E+02	5.85E+03
1.15E+02	5.93E+03
1.18E+02	5.94E+03
1.21E+02	6.12E+03
1.24E+02	6.23E+03
1.27E+02	6.37E+03
1.30E+02	6.60E+03
1.33E+02	6.65E+03
1.36E+02	6.74E+03
1.39E+02	6.74E+03
1.42E+02	6.52E+03
1.44E+02	6.04E+03
1.47E+02	5.73E+03
1.50E+02	5.96E+03
1.53E+02	6.08E+03
1.56E+02	6.19E+03
1.59E+02	6.42E+03
1.62E+02	6.41E+03
1.65E+02	6.38E+03
1.68E+02	6.24E+03
1.70E+02	6.19E+03
1.73E+02	6.16E+03
1.76E+02	6.04E+03
1.79E+02	6.27E+03
1.82E+02	6.31E+03
1.85E+02	6.20E+03
1.88E+02	6.41E+03
1.91E+02	6.50E+03
1.94E+02	6.54E+03
1.96E+02	6.47E+03
1.99E+02	6.54E+03
2.02E+02	6.34E+03
2.05E+02	6.63E+03
2.08E+02	7.04E+03
2.11E+02	6.99E+03
2.14E+02	6.87E+03
2.17E+02	6.60E+03
2.19E+02	6.44E+03
2.22E+02	6.61E+03
2.25E+02	6.89E+03
2.28E+02	7.08E+03
2.31E+02	6.88E+03
2.34E+02	6.96E+03
2.37E+02	7.26E+03
2.40E+02	6.94E+03
2.42E+02	6.96E+03
2.45E+02	6.84E+03
2.48E+02	6.54E+03
2.51E+02	6.87E+03
2.54E+02	6.79E+03
2.57E+02	6.48E+03
2.60E+02	6.80E+03
2.62E+02	6.92E+03
2.65E+02	6.83E+03
2.68E+02	7.07E+03
2.71E+02	7.24E+03
2.74E+02	7.25E+03
2.77E+02	7.13E+03
2.80E+02	7.20E+03
2.82E+02	7.27E+03
2.85E+02	7.35E+03
2.88E+02	7.38E+03
2.91E+02	7.28E+03
2.94E+02	7.24E+03
2.97E+02	7.15E+03
2.99E+02	6.97E+03
3.02E+02	7.00E+03
3.05E+02	6.94E+03
3.08E+02	6.98E+03
3.11E+02	7.21E+03
3.14E+02	6.98E+03
3.17E+02	6.74E+03
3.19E+02	6.88E+03
3.22E+02	6.99E+03
3.25E+02	7.23E+03
3.28E+02	7.69E+03
3.31E+02	7.94E+03
3.34E+02	7.48E+03
3.36E+02	7.28E+03
3.39E+02	7.40E+03
3.42E+02	7.51E+03
3.45E+02	7.56E+03
3.48E+02	7.65E+03
3.51E+02	7.21E+03
3.53E+02	6.98E+03
3.56E+02	6.89E+03
3.59E+02	6.84E+03
3.62E+02	7.35E+03
3.65E+02	7.48E+03
3.67E+02	7.18E+03
3.70E+02	7.40E+03
3.73E+02	7.49E+03
3.76E+02	7.45E+03
3.79E+02	7.29E+03
3.82E+02	7.09E+03
3.84E+02	6.86E+03
3.87E+02	7.20E+03
3.90E+02	7.23E+03
3.93E+02	6.88E+03
3.96E+02	6.64E+03
3.98E+02	7.11E+03
4.01E+02	7.49E+03
4.04E+02	7.35E+03
4.07E+02	7.36E+03
4.10E+02	7.40E+03
4.13E+02	7.27E+03
4.15E+02	7.06E+03
4.18E+02	6.95E+03
4.21E+02	6.70E+03
4.24E+02	7.11E+03
4.27E+02	7.73E+03
4.29E+02	7.63E+03
4.32E+02	7.00E+03
4.35E+02	6.75E+03
4.38E+02	6.79E+03
4.41E+02	7.26E+03
4.43E+02	7.43E+03
4.46E+02	7.35E+03
4.49E+02	6.92E+03
4.52E+02	6.61E+03
4.55E+02	6.74E+03
4.57E+02	7.13E+03
4.60E+02	7.23E+03
4.63E+02	6.99E+03
4.66E+02	7.39E+03
4.69E+02	7.44E+03
4.71E+02	6.82E+03
4.74E+02	6.89E+03
4.77E+02	7.53E+03
4.80E+02	7.37E+03
4.82E+02	7.26E+03
4.85E+02	7.17E+03
4.88E+02	7.15E+03
4.91E+02	6.87E+03
4.94E+02	6.84E+03
4.96E+02	7.20E+03
4.99E+02	7.48E+03
5.02E+02	7.46E+03
5.05E+02	7.16E+03
5.08E+02	6.91E+03
5.10E+02	7.02E+03
5.13E+02	7.13E+03
5.16E+02	7.22E+03
5.19E+02	6.97E+03
5.21E+02	6.71E+03
5.24E+02	7.34E+03
5.27E+02	7.58E+03
5.30E+02	7.38E+03
5.32E+02	7.27E+03
5.35E+02	7.01E+03
5.38E+02	7.23E+03
5.41E+02	7.16E+03
5.44E+02	7.22E+03
5.46E+02	7.06E+03
5.49E+02	7.25E+03
5.52E+02	7.40E+03
5.55E+02	7.26E+03
5.57E+02	7.47E+03
5.60E+02	7.65E+03
5.63E+02	7.48E+03
5.66E+02	7.32E+03
5.68E+02	7.08E+03
5.71E+02	7.25E+03
5.74E+02	7.37E+03
5.77E+02	7.33E+03
5.79E+02	7.41E+03
5.82E+02	7.34E+03
5.85E+02	7.10E+03
5.88E+02	7.23E+03
5.90E+02	7.45E+03
5.93E+02	7.65E+03
5.96E+02	7.27E+03
5.99E+02	6.99E+03
6.01E+02	7.00E+03
6.04E+02	7.05E+03
6.07E+02	7.08E+03
6.10E+02	7.03E+03
6.12E+02	7.30E+03
6.15E+02	7.87E+03
6.18E+02	7.93E+03
6.21E+02	7.54E+03
6.23E+02	7.56E+03
6.26E+02	7.15E+03
6.29E+02	6.94E+03
6.32E+02	7.17E+03
6.34E+02	7.44E+03
6.37E+02	7.75E+03
6.40E+02	7.34E+03
6.43E+02	7.61E+03
6.45E+02	7.55E+03
6.48E+02	7.31E+03
6.51E+02	7.65E+03
6.54E+02	7.74E+03
6.56E+02	8.11E+03
6.59E+02	7.78E+03
6.62E+02	7.28E+03
6.64E+02	7.30E+03
6.67E+02	7.53E+03
6.70E+02	7.63E+03
6.73E+02	7.85E+03
6.75E+02	7.79E+03
6.78E+02	7.49E+03
6.81E+02	7.80E+03
6.84E+02	7.59E+03
6.86E+02	7.60E+03
6.89E+02	7.76E+03
6.92E+02	7.50E+03
6.94E+02	7.75E+03
6.97E+02	7.63E+03
7.00E+02	7.56E+03
7.03E+02	7.91E+03
7.05E+02	7.74E+03
7.08E+02	7.73E+03
7.11E+02	7.25E+03
7.13E+02	7.37E+03
7.16E+02	7.56E+03
7.19E+02	8.07E+03
7.22E+02	7.73E+03
7.24E+02	7.42E+03
7.27E+02	7.86E+03
7.30E+02	8.01E+03
7.32E+02	7.59E+03
7.35E+02	7.50E+03
7.38E+02	7.67E+03
7.40E+02	7.80E+03
7.43E+02	7.84E+03
7.46E+02	7.43E+03
7.49E+02	7.42E+03
7.51E+02	7.87E+03
7.54E+02	7.67E+03
7.57E+02	7.64E+03
7.59E+02	7.61E+03
7.62E+02	7.77E+03
7.65E+02	7.91E+03
7.67E+02	7.85E+03
7.70E+02	7.89E+03
7.73E+02	7.58E+03
7.76E+02	7.48E+03
7.78E+02	8.07E+03
7.81E+02	8.07E+03
7.84E+02	7.89E+03
7.86E+02	7.81E+03
7.89E+02	7.95E+03
7.92E+02	7.78E+03
7.94E+02	7.51E+03
7.97E+02	8.00E+03
8.00E+02	8.54E+03
8.02E+02	8.02E+03
8.05E+02	7.87E+03
8.08E+02	7.88E+03
8.10E+02	7.71E+03
8.13E+02	7.79E+03
8.16E+02	8.45E+03
8.19E+02	8.46E+03
8.21E+02	8.20E+03
8.24E+02	8.21E+03
8.27E+02	8.02E+03
8.29E+02	8.29E+03
8.32E+02	8.68E+03
8.35E+02	8.15E+03
8.37E+02	7.37E+03
8.40E+02	7.68E+03
8.43E+02	8.00E+03
8.45E+02	7.80E+03
8.48E+02	7.92E+03
8.51E+02	7.59E+03
8.53E+02	7.80E+03
8.56E+02	8.41E+03
8.59E+02	8.73E+03
8.61E+02	8.24E+03
8.64E+02	8.12E+03
8.67E+02	7.98E+03
8.69E+02	7.90E+03
8.72E+02	8.31E+03
8.75E+02	8.44E+03
8.77E+02	8.49E+03
8.80E+02	8.12E+03
8.83E+02	8.34E+03
8.85E+02	8.68E+03
8.88E+02	8.50E+03
8.91E+02	8.26E+03
8.93E+02	8.15E+03
8.96E+02	8.05E+03
8.98E+02	8.40E+03
9.01E+02	8.74E+03
9.04E+02	8.72E+03
9.06E+02	8.70E+03
9.09E+02	8.58E+03
9.12E+02	8.20E+03
9.14E+02	8.56E+03
9.17E+02	8.66E+03
9.20E+02	8.57E+03
9.22E+02	8.56E+03
9.25E+02	8.30E+03
9.28E+02	8.27E+03
9.30E+02	8.85E+03
9.33E+02	8.77E+03
9.36E+02	8.42E+03
9.38E+02	8.43E+03
9.41E+02	8.33E+03
9.43E+02	8.38E+03
9.46E+02	8.59E+03
9.49E+02	8.59E+03
9.51E+02	8.95E+03
9.54E+02	9.26E+03
9.57E+02	9.01E+03
9.59E+02	8.83E+03
9.62E+02	8.78E+03
9.65E+02	8.89E+03
9.67E+02	8.70E+03
9.70E+02	8.47E+03
9.72E+02	8.91E+03
9.75E+02	9.31E+03
9.78E+02	9.26E+03
9.80E+02	9.02E+03
9.83E+02	9.31E+03
9.86E+02	9.30E+03
9.88E+02	8.90E+03
9.91E+02	8.94E+03
9.93E+02	8.99E+03
9.96E+02	9.35E+03
9.99E+02	9.54E+03
1.00E+03	8.98E+03
1.00E+03	8.75E+03
1.01E+03	9.10E+03
1.01E+03	9.44E+03
1.01E+03	9.38E+03
1.01E+03	9.20E+03
1.02E+03	9.26E+03
1.02E+03	9.25E+03
1.02E+03	9.31E+03
1.02E+03	9.62E+03
1.03E+03	9.24E+03
1.03E+03	8.84E+03
1.03E+03	8.97E+03
1.04E+03	9.05E+03
1.04E+03	8.95E+03
1.04E+03	9.11E+03
1.04E+03	9.16E+03
1.05E+03	9.20E+03
1.05E+03	9.33E+03
1.05E+03	9.20E+03
1.05E+03	9.26E+03
1.06E+03	9.56E+03
1.06E+03	1.01E+04
1.06E+03	9.58E+03
1.06E+03	9.75E+03
1.07E+03	9.60E+03
1.07E+03	9.59E+03
1.07E+03	9.83E+03
1.07E+03	9.81E+03
1.08E+03	9.90E+03
1.08E+03	9.75E+03
1.08E+03	9.48E+03
1.08E+03	9.41E+03
1.09E+03	9.70E+03
1.09E+03	9.84E+03
1.09E+03	9.59E+03
1.10E+03	9.57E+03
1.10E+03	1.01E+04
1.10E+03	9.97E+03
1.10E+03	9.64E+03
1.11E+03	9.54E+03
1.11E+03	9.73E+03
1.11E+03	1.03E+04
1.11E+03	9.81E+03
1.12E+03	9.15E+03
1.12E+03	9.41E+03
1.12E+03	9.69E+03
1.12E+03	9.41E+03
1.13E+03	9.66E+03
1.13E+03	1.04E+04
1.13E+03	1.01E+04
1.13E+03	9.79E+03
1.14E+03	9.72E+03
1.14E+03	9.35E+03
1.14E+03	9.86E+03
1.14E+03	9.76E+03
1.15E+03	9.55E+03
1.15E+03	9.40E+03
1.15E+03	9.52E+03
1.15E+03	9.68E+03
1.16E+03	9.57E+03
1.16E+03	9.56E+03
1.16E+03	9.68E+03
1.16E+03	9.57E+03
1.17E+03	9.90E+03
1.17E+03	9.99E+03
1.17E+03	1.03E+04
1.18E+03	1.02E+04
1.18E+03	9.70E+03
1.18E+03	1.01E+04
1.18E+03	1.02E+04
1.19E+03	1.01E+04
1.19E+03	1.02E+04
1.19E+03	1.01E+04
1.19E+03	9.89E+03
1.20E+03	9.65E+03
1.20E+03	1.02E+04
1.20E+03	1.07E+04
1.20E+03	1.04E+04
1.21E+03	9.87E+03
1.21E+03	1.02E+04
1.21E+03	1.03E+04
1.21E+03	1.03E+04
1.22E+03	1.06E+04
1.22E+03	1.06E+04
1.22E+03	1.04E+04
1.22E+03	1.05E+04
1.23E+03	1.01E+04
1.23E+03	9.71E+03
1.23E+03	9.79E+03
1.23E+03	1.01E+04
1.24E+03	1.05E+04
1.24E+03	1.04E+04
1.24E+03	1.03E+04
1.24E+03	1.02E+04
1.25E+03	1.02E+04
1.25E+03	1.01E+04
1.25E+03	1.02E+04
1.25E+03	1.01E+04
1.26E+03	1.04E+04
1.26E+03	1.07E+04
1.26E+03	1.05E+04
1.26E+03	1.03E+04
1.27E+03	1.02E+04
1.27E+03	1.02E+04
1.27E+03	1.03E+04
1.27E+03	1.03E+04
1.28E+03	1.04E+04
1.28E+03	1.05E+04
1.28E+03	1.09E+04
1.28E+03	1.13E+04
1.29E+03	1.12E+04
1.29E+03	1.13E+04
1.29E+03	1.16E+04
1.29E+03	1.14E+04
1.30E+03	1.08E+04
1.30E+03	1.06E+04
1.30E+03	1.05E+04
1.31E+03	1.04E+04
1.31E+03	1.08E+04
1.31E+03	1.10E+04
1.31E+03	1.14E+04
1.32E+03	1.15E+04
1.32E+03	1.15E+04
1.32E+03	1.08E+04
1.32E+03	1.05E+04
1.33E+03	1.06E+04
1.33E+03	1.11E+04
1.33E+03	1.09E+04
1.33E+03	1.11E+04
1.34E+03	1.13E+04
1.34E+03	1.14E+04
1.34E+03	1.09E+04
1.34E+03	1.08E+04
1.35E+03	1.08E+04
1.35E+03	1.04E+04
1.35E+03	1.05E+04
1.35E+03	1.11E+04
1.36E+03	1.11E+04
1.36E+03	1.11E+04
1.36E+03	1.13E+04
1.36E+03	1.09E+04
1.37E+03	1.07E+04
1.37E+03	1.09E+04
1.37E+03	1.11E+04
1.37E+03	1.11E+04
1.38E+03	1.11E+04
1.38E+03	1.07E+04
1.38E+03	1.08E+04
1.38E+03	1.11E+04
1.39E+03	1.10E+04
1.39E+03	1.05E+04
1.39E+03	1.05E+04
1.39E+03	1.07E+04
1.40E+03	1.08E+04
1.40E+03	1.09E+04
1.40E+03	1.06E+04
1.40E+03	1.07E+04
1.41E+03	1.07E+04
1.41E+03	1.08E+04
1.41E+03	1.06E+04
1.41E+03	1.05E+04
1.42E+03	1.05E+04
1.42E+03	1.08E+04
1.42E+03	1.13E+04
1.42E+03	1.12E+04
1.43E+03	1.04E+04
1.43E+03	1.03E+04
1.43E+03	1.04E+04
1.43E+03	1.04E+04
1.44E+03	1.02E+04
1.44E+03	1.01E+04
1.44E+03	1.02E+04
1.44E+03	1.03E+04
1.45E+03	1.05E+04
1.45E+03	1.05E+04
1.45E+03	1.02E+04
1.45E+03	1.04E+04
1.46E+03	1.06E+04
1.46E+03	1.06E+04
1.46E+03	1.02E+04
1.46E+03	9.93E+03
1.47E+03	9.97E+03
1.47E+03	1.01E+04
1.47E+03	1.03E+04
1.47E+03	1.06E+04
1.48E+03	1.10E+04
1.48E+03	1.07E+04
1.48E+03	1.03E+04
1.48E+03	9.69E+03
1.48E+03	9.64E+03
1.49E+03	9.98E+03
1.49E+03	1.03E+04
1.49E+03	1.05E+04
1.49E+03	1.05E+04
1.50E+03	1.06E+04
1.50E+03	1.04E+04
1.50E+03	1.06E+04
1.50E+03	1.03E+04
1.51E+03	1.01E+04
1.51E+03	9.95E+03
1.51E+03	1.02E+04
1.51E+03	1.05E+04
1.52E+03	1.03E+04
1.52E+03	1.05E+04
1.52E+03	1.07E+04
1.52E+03	1.03E+04
1.53E+03	1.02E+04
1.53E+03	1.02E+04
1.53E+03	1.03E+04
1.53E+03	1.06E+04
1.54E+03	1.06E+04
1.54E+03	1.04E+04
1.54E+03	1.08E+04
1.54E+03	1.11E+04
1.55E+03	1.16E+04
1.55E+03	1.15E+04
1.55E+03	1.16E+04
1.55E+03	1.16E+04
1.56E+03	1.13E+04
1.56E+03	1.11E+04
1.56E+03	1.11E+04
1.56E+03	1.12E+04
1.57E+03	1.16E+04
1.57E+03	1.19E+04
1.57E+03	1.18E+04
1.57E+03	1.16E+04
1.58E+03	1.11E+04
1.58E+03	1.09E+04
1.58E+03	1.11E+04
1.58E+03	1.13E+04
1.59E+03	1.17E+04
1.59E+03	1.17E+04
1.59E+03	1.18E+04
1.59E+03	1.13E+04
1.60E+03	1.14E+04
1.60E+03	1.16E+04
1.60E+03	1.18E+04
1.60E+03	1.19E+04
1.61E+03	1.12E+04
1.61E+03	1.11E+04
1.61E+03	1.12E+04
1.61E+03	1.10E+04
1.61E+03	1.04E+04
1.62E+03	1.07E+04
1.62E+03	1.10E+04
1.62E+03	1.08E+04
1.62E+03	1.03E+04
1.63E+03	1.02E+04
1.63E+03	1.04E+04
1.63E+03	1.04E+04
1.63E+03	1.05E+04
1.64E+03	1.02E+04
1.64E+03	1.02E+04
1.64E+03	1.03E+04
1.64E+03	1.00E+04
1.65E+03	1.03E+04
1.65E+03	1.03E+04
1.65E+03	1.02E+04
1.65E+03	9.80E+03
1.66E+03	9.69E+03
1.66E+03	9.77E+03
1.66E+03	9.74E+03
1.66E+03	9.87E+03
1.67E+03	9.69E+03
1.67E+03	9.89E+03
1.67E+03	1.02E+04
1.67E+03	1.02E+04
1.68E+03	1.02E+04
1.68E+03	1.01E+04
1.68E+03	9.54E+03
1.68E+03	9.26E+03
1.69E+03	9.55E+03
1.69E+03	9.77E+03
1.69E+03	9.95E+03
1.69E+03	1.03E+04
1.69E+03	1.00E+04
1.70E+03	9.51E+03
1.70E+03	9.13E+03
1.70E+03	9.37E+03
1.70E+03	9.38E+03
1.71E+03	9.95E+03
1.71E+03	1.02E+04
1.71E+03	9.82E+03
1.71E+03	9.82E+03
1.72E+03	9.81E+03
1.72E+03	9.97E+03
1.72E+03	9.97E+03
1.72E+03	9.62E+03
1.73E+03	9.71E+03
1.73E+03	9.37E+03
1.73E+03	9.24E+03
1.73E+03	9.43E+03
1.74E+03	9.90E+03
1.74E+03	1.01E+04
1.74E+03	9.86E+03
1.74E+03	9.92E+03
1.75E+03	9.55E+03
1.75E+03	9.04E+03
1.75E+03	8.79E+03
1.75E+03	9.07E+03
1.75E+03	9.74E+03
1.76E+03	1.05E+04
1.76E+03	1.04E+04
1.76E+03	1.00E+04
1.76E+03	9.66E+03
1.77E+03	9.74E+03
1.77E+03	1.00E+04
1.77E+03	9.99E+03
1.77E+03	9.74E+03
1.78E+03	9.52E+03
1.78E+03	1.00E+04
1.78E+03	1.03E+04
1.78E+03	9.92E+03
1.79E+03	1.02E+04
1.79E+03	9.81E+03
1.79E+03	9.83E+03
1.79E+03	9.74E+03
1.80E+03	9.90E+03
1.80E+03	9.92E+03
1.80E+03	9.89E+03
1.80E+03	9.95E+03
1.80E+03	9.85E+03
1.81E+03	9.67E+03
1.81E+03	9.13E+03
1.81E+03	8.82E+03
1.81E+03	9.14E+03
1.82E+03	9.40E+03
1.82E+03	1.01E+04
1.82E+03	1.04E+04
1.82E+03	1.00E+04
1.83E+03	9.43E+03
1.83E+03	9.24E+03
1.83E+03	9.38E+03
1.83E+03	9.24E+03
1.84E+03	9.60E+03
1.84E+03	9.88E+03
1.84E+03	9.65E+03
1.84E+03	9.91E+03
1.84E+03	1.02E+04
1.85E+03	9.91E+03
1.85E+03	9.47E+03
1.85E+03	9.73E+03
1.85E+03	1.03E+04
1.86E+03	1.02E+04
1.86E+03	9.79E+03
1.86E+03	9.64E+03
1.86E+03	9.99E+03
1.87E+03	1.01E+04
1.87E+03	9.71E+03
1.87E+03	9.63E+03
1.87E+03	9.70E+03
1.88E+03	9.49E+03
1.88E+03	9.61E+03
1.88E+03	9.61E+03
1.88E+03	9.93E+03
1.89E+03	1.03E+04
1.89E+03	1.04E+04
1.89E+03	1.00E+04
1.89E+03	9.94E+03
1.89E+03	9.92E+03
1.90E+03	1.01E+04
1.90E+03	1.03E+04
1.90E+03	1.02E+04
1.90E+03	1.03E+04
1.91E+03	1.02E+04
1.91E+03	9.98E+03
1.91E+03	9.95E+03
1.91E+03	1.02E+04
1.92E+03	1.05E+04
1.92E+03	1.03E+04
1.92E+03	9.96E+03
1.92E+03	9.79E+03
1.92E+03	9.73E+03
1.93E+03	9.69E+03
1.93E+03	9.52E+03
1.93E+03	9.90E+03
1.93E+03	1.04E+04
1.94E+03	1.06E+04
1.94E+03	1.02E+04
1.94E+03	9.88E+03
1.94E+03	9.91E+03
1.95E+03	9.84E+03
1.95E+03	9.97E+03
1.95E+03	1.03E+04
1.95E+03	1.04E+04
1.96E+03	1.05E+04
1.96E+03	1.01E+04
1.96E+03	9.89E+03
1.96E+03	9.79E+03
1.96E+03	9.95E+03
1.97E+03	1.00E+04
1.97E+03	1.04E+04
1.97E+03	1.02E+04
1.97E+03	1.02E+04
1.98E+03	1.00E+04
1.98E+03	1.02E+04
1.98E+03	1.03E+04
1.98E+03	1.00E+04
1.99E+03	1.02E+04
1.99E+03	1.06E+04
1.99E+03	1.04E+04
1.99E+03	1.02E+04
1.99E+03	1.03E+04
2.00E+03	1.02E+04
2.00E+03	1.02E+04
2.00E+03	1.03E+04
2.00E+03	1.01E+04
2.01E+03	1.02E+04
2.01E+03	1.03E+04
2.01E+03	1.05E+04
2.01E+03	1.04E+04
2.02E+03	1.03E+04
2.02E+03	1.00E+04
2.02E+03	9.68E+03
2.02E+03	9.87E+03
2.02E+03	1.00E+04
2.03E+03	1.02E+04
2.03E+03	1.05E+04
2.03E+03	1.05E+04
2.03E+03	1.01E+04
2.04E+03	1.01E+04
2.04E+03	1.00E+04
2.04E+03	1.04E+04
2.04E+03	1.02E+04
2.05E+03	1.02E+04
2.05E+03	1.04E+04
2.05E+03	1.07E+04
2.05E+03	1.04E+04
2.05E+03	1.00E+04
2.06E+03	9.95E+03
2.06E+03	1.02E+04
2.06E+03	1.04E+04
2.06E+03	1.07E+04
2.07E+03	1.06E+04
2.07E+03	1.04E+04
2.07E+03	1.03E+04
2.07E+03	1.04E+04
2.08E+03	1.05E+04
2.08E+03	1.01E+04
2.08E+03	9.91E+03
2.08E+03	9.96E+03
2.08E+03	1.01E+04
2.09E+03	1.08E+04
2.09E+03	1.10E+04
2.09E+03	1.07E+04
2.09E+03	1.05E+04
2.10E+03	1.03E+04
2.10E+03	1.05E+04
2.10E+03	1.07E+04
2.10E+03	1.05E+04
2.11E+03	1.04E+04
2.11E+03	1.03E+04
2.11E+03	1.04E+04
2.11E+03	1.07E+04
2.11E+03	1.10E+04
2.12E+03	1.09E+04
2.12E+03	1.05E+04
2.12E+03	1.09E+04
2.12E+03	1.06E+04
2.13E+03	1.03E+04
2.13E+03	1.04E+04
2.13E+03	1.02E+04
2.13E+03	1.03E+04
2.13E+03	1.02E+04
2.14E+03	9.91E+03
2.14E+03	1.02E+04
2.14E+03	1.06E+04
2.14E+03	1.05E+04
2.15E+03	1.02E+04
2.15E+03	9.73E+03
2.15E+03	1.03E+04
2.15E+03	1.04E+04
2.16E+03	9.92E+03
2.16E+03	9.81E+03
2.16E+03	1.00E+04
2.16E+03	1.04E+04
2.16E+03	1.08E+04
2.17E+03	1.12E+04
2.17E+03	1.13E+04
2.17E+03	1.09E+04
2.17E+03	1.04E+04
2.18E+03	1.05E+04
2.18E+03	1.05E+04
2.18E+03	1.07E+04
2.18E+03	1.08E+04
2.18E+03	1.09E+04
2.19E+03	1.05E+04
2.19E+03	9.70E+03
2.19E+03	9.60E+03
2.19E+03	9.63E+03
2.20E+03	9.94E+03
2.20E+03	1.01E+04
2.20E+03	1.04E+04
2.20E+03	1.05E+04
2.20E+03	1.04E+04
2.21E+03	1.05E+04
2.21E+03	1.09E+04
2.21E+03	1.15E+04
2.21E+03	1.13E+04
2.22E+03	1.06E+04
2.22E+03	1.03E+04
2.22E+03	1.02E+04
2.22E+03	1.06E+04
2.23E+03	1.12E+04
2.23E+03	1.12E+04
2.23E+03	1.10E+04
2.23E+03	1.11E+04
2.23E+03	1.12E+04
2.24E+03	1.10E+04
2.24E+03	1.08E+04
2.24E+03	1.06E+04
2.24E+03	1.06E+04
2.25E+03	1.02E+04
2.25E+03	1.01E+04
2.25E+03	1.06E+04
2.25E+03	1.12E+04
2.25E+03	1.14E+04
2.26E+03	1.14E+04
2.26E+03	1.11E+04
2.26E+03	1.07E+04
2.26E+03	1.02E+04
2.27E+03	1.06E+04
2.27E+03	1.06E+04
2.27E+03	1.10E+04
2.27E+03	1.10E+04
2.27E+03	1.08E+04
2.28E+03	1.09E+04
2.28E+03	1.08E+04
2.28E+03	1.06E+04
2.28E+03	1.07E+04
2.29E+03	1.08E+04
2.29E+03	1.07E+04
2.29E+03	1.06E+04
2.29E+03	1.07E+04
2.29E+03	1.08E+04
2.30E+03	1.11E+04
2.30E+03	1.11E+04
2.30E+03	1.08E+04
2.30E+03	1.04E+04
2.31E+03	1.07E+04
2.31E+03	1.07E+04
2.31E+03	1.08E+04
2.31E+03	1.10E+04
2.31E+03	1.08E+04
2.32E+03	1.08E+04
2.32E+03	1.09E+04
2.32E+03	1.10E+04
2.32E+03	1.12E+04
2.33E+03	1.12E+04
2.33E+03	1.11E+04
2.33E+03	1.10E+04
2.33E+03	1.11E+04
2.33E+03	1.07E+04
2.34E+03	1.08E+04
2.34E+03	1.10E+04
2.34E+03	1.10E+04
2.34E+03	1.12E+04
2.35E+03	1.12E+04
2.35E+03	1.09E+04
2.35E+03	1.12E+04
2.35E+03	1.17E+04
2.35E+03	1.18E+04
2.36E+03	1.16E+04
2.36E+03	1.13E+04
2.36E+03	1.12E+04
2.36E+03	1.12E+04
2.37E+03	1.12E+04
2.37E+03	1.12E+04
2.37E+03	1.09E+04
2.37E+03	1.08E+04
2.37E+03	1.12E+04
2.38E+03	1.14E+04
2.38E+03	1.17E+04
2.38E+03	1.17E+04
2.38E+03	1.18E+04
2.39E+03	1.20E+04
2.39E+03	1.19E+04
2.39E+03	1.13E+04
2.39E+03	1.09E+04
2.39E+03	1.12E+04
2.40E+03	1.12E+04
2.40E+03	1.08E+04
2.40E+03	1.10E+04
2.40E+03	1.12E+04
2.41E+03	1.14E+04
2.41E+03	1.14E+04
2.41E+03	1.12E+04
2.41E+03	1.09E+04
2.41E+03	1.12E+04
2.42E+03	1.15E+04
2.42E+03	1.16E+04
2.42E+03	1.18E+04
2.42E+03	1.20E+04
2.42E+03	1.20E+04
2.43E+03	1.16E+04
2.43E+03	1.14E+04
2.43E+03	1.11E+04
2.43E+03	1.12E+04
2.44E+03	1.13E+04
2.44E+03	1.13E+04
2.44E+03	1.10E+04
2.44E+03	1.11E+04
2.44E+03	1.15E+04
2.45E+03	1.15E+04
2.45E+03	1.14E+04
2.45E+03	1.17E+04
2.45E+03	1.17E+04
2.46E+03	1.18E+04
2.46E+03	1.18E+04
2.46E+03	1.19E+04
2.46E+03	1.20E+04
2.46E+03	1.20E+04
2.47E+03	1.18E+04
2.47E+03	1.18E+04
2.47E+03	1.16E+04
2.47E+03	1.10E+04
2.48E+03	1.12E+04
2.48E+03	1.17E+04
2.48E+03	1.20E+04
2.48E+03	1.19E+04
2.48E+03	1.20E+04
2.49E+03	1.19E+04
2.49E+03	1.17E+04
2.49E+03	1.20E+04
2.49E+03	1.23E+04
2.49E+03	1.18E+04
2.50E+03	1.19E+04
2.50E+03	1.20E+04
2.50E+03	1.20E+04
2.50E+03	1.19E+04
2.51E+03	1.15E+04
2.51E+03	1.14E+04
2.51E+03	1.21E+04
2.51E+03	1.23E+04
2.51E+03	1.21E+04
2.52E+03	1.22E+04
2.52E+03	1.22E+04
2.52E+03	1.20E+04
2.52E+03	1.20E+04
2.53E+03	1.20E+04
2.53E+03	1.21E+04
2.53E+03	1.18E+04
2.53E+03	1.19E+04
2.53E+03	1.21E+04
2.54E+03	1.22E+04
2.54E+03	1.20E+04
2.54E+03	1.18E+04
2.54E+03	1.22E+04
2.54E+03	1.25E+04
2.55E+03	1.26E+04
2.55E+03	1.25E+04
2.55E+03	1.26E+04
2.55E+03	1.21E+04
2.56E+03	1.16E+04
2.56E+03	1.15E+04
2.56E+03	1.21E+04
2.56E+03	1.20E+04
2.56E+03	1.14E+04
2.57E+03	1.18E+04
2.57E+03	1.26E+04
2.57E+03	1.25E+04
2.57E+03	1.26E+04
2.57E+03	1.25E+04
2.58E+03	1.22E+04
2.58E+03	1.22E+04
2.58E+03	1.28E+04
2.58E+03	1.26E+04
2.59E+03	1.24E+04
2.59E+03	1.23E+04
2.59E+03	1.21E+04
2.59E+03	1.20E+04
2.59E+03	1.20E+04
2.60E+03	1.21E+04
2.60E+03	1.26E+04
2.60E+03	1.32E+04
2.60E+03	1.31E+04
2.60E+03	1.28E+04
2.61E+03	1.31E+04
2.61E+03	1.31E+04
2.61E+03	1.26E+04
2.61E+03	1.22E+04
2.62E+03	1.18E+04
2.62E+03	1.18E+04
2.62E+03	1.25E+04
2.62E+03	1.30E+04
2.62E+03	1.32E+04
2.63E+03	1.26E+04
2.63E+03	1.21E+04
2.63E+03	1.25E+04
2.63E+03	1.36E+04
2.63E+03	1.38E+04
2.64E+03	1.29E+04
2.64E+03	1.20E+04
2.64E+03	1.18E+04
2.64E+03	1.18E+04
2.65E+03	1.20E+04
2.65E+03	1.23E+04
2.65E+03	1.28E+04
2.65E+03	1.25E+04
2.65E+03	1.22E+04
2.66E+03	1.19E+04
2.66E+03	1.24E+04
2.66E+03	1.31E+04
2.66E+03	1.31E+04
2.66E+03	1.36E+04
2.67E+03	1.35E+04
2.67E+03	1.27E+04
2.67E+03	1.22E+04
2.67E+03	1.24E+04
2.67E+03	1.29E+04
2.68E+03	1.32E+04
2.68E+03	1.35E+04
2.68E+03	1.31E+04
2.68E+03	1.28E+04
2.69E+03	1.28E+04
2.69E+03	1.27E+04
2.69E+03	1.25E+04
2.69E+03	1.31E+04
2.69E+03	1.35E+04
2.70E+03	1.30E+04
2.70E+03	1.27E+04
2.70E+03	1.26E+04
2.70E+03	1.29E+04
2.70E+03	1.28E+04
2.71E+03	1.31E+04
2.71E+03	1.31E+04
2.71E+03	1.28E+04
2.71E+03	1.24E+04
2.71E+03	1.23E+04
2.72E+03	1.25E+04
2.72E+03	1.31E+04
2.72E+03	1.31E+04
2.72E+03	1.34E+04
2.73E+03	1.36E+04
2.73E+03	1.34E+04
2.73E+03	1.27E+04
2.73E+03	1.18E+04
2.73E+03	1.25E+04
2.74E+03	1.32E+04
2.74E+03	1.39E+04
2.74E+03	1.40E+04
2.74E+03	1.39E+04
2.74E+03	1.41E+04
2.75E+03	1.40E+04
2.75E+03	1.35E+04
2.75E+03	1.34E+04
2.75E+03	1.30E+04
2.75E+03	1.30E+04
2.76E+03	1.29E+04
2.76E+03	1.27E+04
2.76E+03	1.26E+04
2.76E+03	1.27E+04
2.77E+03	1.29E+04
2.77E+03	1.32E+04
2.77E+03	1.31E+04
2.77E+03	1.35E+04
2.77E+03	1.36E+04
2.78E+03	1.34E+04
2.78E+03	1.35E+04
2.78E+03	1.37E+04
2.78E+03	1.31E+04
2.78E+03	1.25E+04
2.79E+03	1.28E+04
2.79E+03	1.31E+04
2.79E+03	1.39E+04
2.79E+03	1.42E+04
2.79E+03	1.39E+04
2.80E+03	1.31E+04
2.80E+03	1.25E+04
2.80E+03	1.20E+04
2.80E+03	1.24E+04
2.80E+03	1.28E+04
2.81E+03	1.28E+04
2.81E+03	1.29E+04
2.81E+03	1.31E+04
2.81E+03	1.30E+04
2.82E+03	1.24E+04
2.82E+03	1.22E+04
2.82E+03	1.24E+04
2.82E+03	1.30E+04
2.82E+03	1.32E+04
2.83E+03	1.33E+04
2.83E+03	1.34E+04
2.83E+03	1.33E+04
2.83E+03	1.27E+04
2.83E+03	1.23E+04
2.84E+03	1.22E+04
2.84E+03	1.25E+04
2.84E+03	1.23E+04
2.84E+03	1.25E+04
2.84E+03	1.32E+04
2.85E+03	1.34E+04
2.85E+03	1.33E+04
2.85E+03	1.27E+04
2.85E+03	1.18E+04
2.85E+03	1.17E+04
2.86E+03	1.19E+04
2.86E+03	1.23E+04
2.86E+03	1.25E+04
2.86E+03	1.19E+04
2.87E+03	1.19E+04
2.87E+03	1.24E+04
2.87E+03	1.21E+04
2.87E+03	1.17E+04
2.87E+03	1.16E+04
2.88E+03	1.16E+04
2.88E+03	1.21E+04
2.88E+03	1.28E+04
2.88E+03	1.29E+04
2.88E+03	1.25E+04
2.89E+03	1.23E+04
2.89E+03	1.21E+04
2.89E+03	1.22E+04
2.89E+03	1.27E+04
2.89E+03	1.26E+04
2.90E+03	1.22E+04
2.90E+03	1.20E+04
2.90E+03	1.21E+04
2.90E+03	1.21E+04
2.90E+03	1.20E+04
2.91E+03	1.13E+04
2.91E+03	1.10E+04
2.91E+03	1.15E+04
2.91E+03	1.25E+04
2.91E+03	1.29E+04
2.92E+03	1.27E+04
2.92E+03	1.29E+04
2.92E+03	1.30E+04
2.92E+03	1.29E+04
2.92E+03	1.24E+04
2.93E+03	1.23E+04
2.93E+03	1.19E+04
2.93E+03	1.17E+04
2.93E+03	1.18E+04
2.93E+03	1.20E+04
2.94E+03	1.23E+04
2.94E+03	1.25E+04
2.94E+03	1.25E+04
2.94E+03	1.23E+04
2.95E+03	1.19E+04
2.95E+03	1.21E+04
2.95E+03	1.23E+04
2.95E+03	1.24E+04
2.95E+03	1.23E+04
2.96E+03	1.24E+04
2.96E+03	1.24E+04
2.96E+03	1.24E+04
2.96E+03	1.19E+04
2.96E+03	1.16E+04
2.97E+03	1.15E+04
2.97E+03	1.15E+04
2.97E+03	1.17E+04
2.97E+03	1.18E+04
2.97E+03	1.19E+04
2.98E+03	1.20E+04
2.98E+03	1.23E+04
2.98E+03	1.18E+04
2.98E+03	1.18E+04
2.98E+03	1.26E+04
2.99E+03	1.29E+04
2.99E+03	1.27E+04
2.99E+03	1.22E+04
2.99E+03	1.20E+04
2.99E+03	1.18E+04
3.00E+03	1.14E+04
3.00E+03	1.15E+04
3.00E+03	1.15E+04
3.00E+03	1.16E+04
3.00E+03	1.22E+04
3.01E+03	1.28E+04
3.01E+03	1.26E+04
3.01E+03	1.20E+04
3.01E+03	1.19E+04
3.01E+03	1.15E+04
3.02E+03	1.14E+04
3.02E+03	1.17E+04
3.02E+03	1.18E+04
3.02E+03	1.21E+04
3.02E+03	1.18E+04
3.03E+03	1.16E+04
3.03E+03	1.13E+04
3.03E+03	1.12E+04
3.03E+03	1.14E+04
3.03E+03	1.15E+04
3.04E+03	1.18E+04
3.04E+03	1.18E+04
3.04E+03	1.14E+04
3.04E+03	1.17E+04
3.04E+03	1.12E+04
3.05E+03	1.14E+04
3.05E+03	1.18E+04
3.05E+03	1.23E+04
3.05E+03	1.20E+04
3.05E+03	1.16E+04
3.06E+03	1.16E+04
3.06E+03	1.14E+04
3.06E+03	1.11E+04
3.06E+03	1.13E+04
3.06E+03	1.12E+04
3.07E+03	1.14E+04
3.07E+03	1.17E+04
3.07E+03	1.18E+04
3.07E+03	1.15E+04
3.07E+03	1.11E+04
3.08E+03	1.05E+04
3.08E+03	1.04E+04
3.08E+03	1.09E+04
3.08E+03	1.11E+04
3.08E+03	1.13E+04
3.09E+03	1.14E+04
3.09E+03	1.14E+04
3.09E+03	1.13E+04
3.09E+03	1.08E+04
3.09E+03	1.03E+04
3.10E+03	1.03E+04
3.10E+03	1.06E+04
3.10E+03	1.08E+04
3.10E+03	1.09E+04
3.10E+03	1.10E+04
3.11E+03	1.09E+04
3.11E+03	1.15E+04
3.11E+03	1.15E+04
3.11E+03	1.14E+04
3.11E+03	1.13E+04
3.12E+03	1.12E+04
3.12E+03	1.11E+04
3.12E+03	1.10E+04
3.12E+03	1.14E+04
3.12E+03	1.16E+04
3.13E+03	1.12E+04
3.13E+03	1.10E+04
3.13E+03	1.08E+04
3.13E+03	1.11E+04
3.13E+03	1.14E+04
3.14E+03	1.12E+04
3.14E+03	1.11E+04
3.14E+03	1.10E+04
3.14E+03	1.10E+04
3.14E+03	1.12E+04
3.15E+03	1.06E+04
3.15E+03	1.04E+04
3.15E+03	1.06E+04
3.15E+03	1.12E+04
3.15E+03	1.11E+04
3.16E+03	1.09E+04
3.16E+03	1.04E+04
3.16E+03	1.06E+04
3.16E+03	1.15E+04
3.16E+03	1.19E+04
3.17E+03	1.18E+04
3.17E+03	1.15E+04
3.17E+03	1.10E+04
3.17E+03	1.02E+04
3.17E+03	1.00E+04
3.18E+03	9.99E+03
3.18E+03	1.05E+04
3.18E+03	1.07E+04
3.18E+03	1.08E+04
3.18E+03	1.07E+04
3.19E+03	1.06E+04
3.19E+03	1.06E+04
3.19E+03	1.06E+04
3.19E+03	1.07E+04
3.19E+03	1.09E+04
3.20E+03	1.13E+04
3.20E+03	1.10E+04
3.20E+03	1.07E+04
3.20E+03	1.01E+04
3.20E+03	1.01E+04
3.21E+03	1.02E+04
3.21E+03	1.04E+04
3.21E+03	1.04E+04
3.21E+03	1.05E+04
3.21E+03	1.09E+04
3.22E+03	1.09E+04
3.22E+03	1.09E+04
3.22E+03	1.10E+04
3.22E+03	1.09E+04
3.22E+03	1.09E+04
3.23E+03	1.08E+04
3.23E+03	1.07E+04
3.23E+03	1.05E+04
3.23E+03	1.05E+04
3.23E+03	1.02E+04
3.23E+03	1.03E+04
3.24E+03	1.06E+04
3.24E+03	1.12E+04
3.24E+03	1.12E+04
3.24E+03	1.05E+04
3.24E+03	1.05E+04
3.25E+03	1.03E+04
3.25E+03	1.04E+04
3.25E+03	1.00E+04
3.25E+03	9.90E+03
3.25E+03	1.00E+04
3.26E+03	1.06E+04
3.26E+03	1.07E+04
3.26E+03	1.05E+04
3.26E+03	1.05E+04
3.26E+03	1.04E+04
3.27E+03	1.02E+04
3.27E+03	1.03E+04
3.27E+03	1.01E+04
3.27E+03	9.94E+03
3.27E+03	1.01E+04
3.28E+03	1.01E+04
3.28E+03	9.83E+03
3.28E+03	9.95E+03
3.28E+03	1.01E+04
3.28E+03	1.00E+04
3.29E+03	1.00E+04
3.29E+03	1.04E+04
3.29E+03	1.02E+04
3.29E+03	1.03E+04
3.29E+03	1.08E+04
3.30E+03	1.09E+04
3.30E+03	1.04E+04
3.30E+03	9.80E+03
3.30E+03	9.94E+03
3.30E+03	1.05E+04
3.31E+03	1.02E+04
3.31E+03	1.01E+04
3.31E+03	1.02E+04
3.31E+03	1.04E+04
3.31E+03	1.07E+04
3.31E+03	1.07E+04
3.32E+03	1.04E+04
3.32E+03	9.97E+03
3.32E+03	9.76E+03
3.32E+03	1.02E+04
3.32E+03	1.03E+04
3.33E+03	1.03E+04
3.33E+03	9.99E+03
3.33E+03	1.00E+04
3.33E+03	1.03E+04
3.33E+03	1.02E+04
3.34E+03	1.03E+04
3.34E+03	1.04E+04
3.34E+03	1.03E+04
3.34E+03	9.92E+03
3.34E+03	9.85E+03
3.35E+03	9.92E+03
3.35E+03	1.02E+04
3.35E+03	1.04E+04
3.35E+03	1.04E+04
3.35E+03	1.05E+04
3.36E+03	1.03E+04
3.36E+03	9.77E+03
3.36E+03	9.94E+03
3.36E+03	9.82E+03
3.36E+03	9.80E+03
3.36E+03	9.47E+03
3.37E+03	9.02E+03
3.37E+03	9.62E+03
3.37E+03	9.75E+03
3.37E+03	9.63E+03
3.37E+03	1.00E+04
3.38E+03	9.76E+03
3.38E+03	9.79E+03
3.38E+03	1.05E+04
3.38E+03	1.05E+04
3.38E+03	1.06E+04
3.39E+03	9.86E+03
3.39E+03	1.02E+04
3.39E+03	9.84E+03
3.39E+03	1.00E+04
3.39E+03	9.72E+03
3.40E+03	9.69E+03
3.40E+03	9.98E+03
3.40E+03	1.01E+04
3.40E+03	9.77E+03
3.40E+03	9.62E+03
3.41E+03	9.81E+03
3.41E+03	9.90E+03
3.41E+03	9.69E+03
3.41E+03	9.62E+03
3.41E+03	1.02E+04
3.41E+03	1.01E+04
3.42E+03	1.00E+04
3.42E+03	9.85E+03
3.42E+03	9.72E+03
3.42E+03	9.83E+03
3.42E+03	9.36E+03
3.43E+03	9.65E+03
3.43E+03	9.64E+03
3.43E+03	9.67E+03
3.43E+03	9.76E+03
3.43E+03	9.92E+03
3.44E+03	1.03E+04
3.44E+03	9.90E+03
3.44E+03	9.78E+03
3.44E+03	9.70E+03
3.44E+03	9.74E+03
3.45E+03	9.91E+03
3.45E+03	9.83E+03
3.45E+03	9.77E+03
3.45E+03	9.87E+03
3.45E+03	9.51E+03
3.45E+03	9.36E+03
3.46E+03	9.48E+03
3.46E+03	9.55E+03
3.46E+03	9.42E+03
3.46E+03	9.56E+03
3.46E+03	1.03E+04
3.47E+03	1.01E+04
3.47E+03	9.52E+03
3.47E+03	9.17E+03
3.47E+03	9.31E+03
3.47E+03	9.42E+03
3.48E+03	9.68E+03
3.48E+03	9.99E+03
3.48E+03	1.01E+04
3.48E+03	9.97E+03
3.48E+03	9.11E+03
3.48E+03	9.00E+03
3.49E+03	9.16E+03
3.49E+03	9.60E+03
3.49E+03	9.69E+03
3.49E+03	9.51E+03
3.49E+03	1.00E+04
3.50E+03	9.98E+03
3.50E+03	9.69E+03
3.50E+03	9.86E+03
3.50E+03	9.70E+03
3.50E+03	9.78E+03
3.51E+03	9.82E+03
3.51E+03	9.88E+03
3.51E+03	9.72E+03
3.51E+03	9.75E+03
3.51E+03	9.77E+03
3.52E+03	9.42E+03
3.52E+03	9.24E+03
3.52E+03	8.80E+03
3.52E+03	8.99E+03
3.52E+03	9.43E+03
3.52E+03	9.70E+03
3.53E+03	9.55E+03
3.53E+03	9.24E+03
3.53E+03	9.40E+03
3.53E+03	9.27E+03
3.53E+03	9.34E+03
3.54E+03	9.76E+03
3.54E+03	9.63E+03
3.54E+03	9.46E+03
3.54E+03	9.25E+03
3.54E+03	9.49E+03
3.55E+03	9.91E+03
3.55E+03	9.66E+03
3.55E+03	9.79E+03
3.55E+03	1.03E+04
3.55E+03	1.05E+04
3.55E+03	1.00E+04
3.56E+03	9.99E+03
3.56E+03	1.01E+04
3.56E+03	9.86E+03
3.56E+03	9.36E+03
3.56E+03	9.46E+03
3.57E+03	9.59E+03
3.57E+03	9.78E+03
3.57E+03	9.62E+03
3.57E+03	9.25E+03
3.57E+03	9.67E+03
3.58E+03	9.97E+03
3.58E+03	9.70E+03
3.58E+03	9.98E+03
3.58E+03	1.01E+04
3.58E+03	9.73E+03
3.58E+03	9.48E+03
3.59E+03	9.99E+03
3.59E+03	9.64E+03
3.59E+03	9.40E+03
3.59E+03	9.52E+03
3.59E+03	9.87E+03
3.60E+03	9.96E+03
3.60E+03	9.89E+03
3.60E+03	9.81E+03
3.60E+03	9.69E+03
3.60E+03	9.81E+03
3.60E+03	9.64E+03
3.61E+03	9.72E+03
3.61E+03	9.66E+03
3.61E+03	9.51E+03
3.61E+03	9.74E+03
3.61E+03	9.83E+03
3.62E+03	9.76E+03
3.62E+03	9.93E+03
3.62E+03	9.93E+03
3.62E+03	1.00E+04
3.62E+03	9.99E+03
3.63E+03	1.03E+04
3.63E+03	1.00E+04
3.63E+03	9.43E+03
3.63E+03	9.71E+03
3.63E+03	9.80E+03
3.63E+03	9.75E+03
3.64E+03	9.73E+03
3.64E+03	9.58E+03
3.64E+03	9.55E+03
3.64E+03	9.71E+03
3.64E+03	9.97E+03
3.65E+03	9.54E+03
3.65E+03	9.41E+03
3.65E+03	9.50E+03
3.65E+03	9.55E+03
3.65E+03	9.52E+03
3.65E+03	1.00E+04
3.66E+03	9.88E+03
3.66E+03	9.63E+03
3.66E+03	9.43E+03
3.66E+03	9.29E+03
3.66E+03	9.52E+03
3.67E+03	9.37E+03
3.67E+03	9.91E+03
3.67E+03	9.69E+03
3.67E+03	9.11E+03
3.67E+03	9.21E+03
3.67E+03	9.26E+03
3.68E+03	9.59E+03
3.68E+03	9.65E+03
3.68E+03	9.88E+03
3.68E+03	1.01E+04
3.68E+03	9.82E+03
3.69E+03	9.37E+03
3.69E+03	9.61E+03
3.69E+03	9.30E+03
3.69E+03	8.94E+03
3.69E+03	8.95E+03
3.70E+03	9.38E+03
3.70E+03	9.45E+03
3.70E+03	9.50E+03
3.70E+03	9.67E+03
3.70E+03	9.99E+03
3.70E+03	9.29E+03
3.71E+03	8.85E+03
3.71E+03	8.94E+03
3.71E+03	9.08E+03
3.71E+03	9.21E+03
3.71E+03	8.97E+03
3.72E+03	9.42E+03
3.72E+03	9.84E+03
3.72E+03	9.61E+03
3.72E+03	9.53E+03
3.72E+03	9.19E+03
3.72E+03	9.13E+03
3.73E+03	8.79E+03
3.73E+03	8.80E+03
3.73E+03	9.47E+03
3.73E+03	9.37E+03
3.73E+03	9.17E+03
3.74E+03	8.90E+03
3.74E+03	8.53E+03
3.74E+03	8.66E+03
3.74E+03	9.10E+03
3.74E+03	9.31E+03
3.74E+03	9.39E+03
3.75E+03	9.21E+03
3.75E+03	9.26E+03
3.75E+03	9.51E+03
3.75E+03	9.13E+03
3.75E+03	8.96E+03
3.76E+03	8.80E+03
3.76E+03	8.90E+03
3.76E+03	9.36E+03
3.76E+03	9.27E+03

## Sheet: 10247 cobaltite
rel. 1/cm	CCD cts
-72.4	632
-69.5	641
-66.5	651
-63.5	655
-60.6	681
-57.6	686
-54.6	683
-51.7	696
-48.7	706
-45.8	731
-42.8	777
-39.8	863
-36.9	1120
-33.9	2000
-31	4360
-28	8590
-25.1	12400
-22.1	16500
-19.2	16900
-16.2	19500
-13.3	21500
-10.3	20200
-7.39	21000
-4.45	16100
-1.5	15100
1.44	15600
4.38	10300
7.32	12600
10.3	10000
13.2	5510
16.1	2320
19.1	1130
22	793
25	703
27.9	673
30.8	651
33.8	639
36.7	668
39.6	622
42.5	616
45.5	613
48.4	623
51.3	632
54.3	669
57.2	731
60.1	820
63	967
65.9	1140
68.9	1370
71.8	1530
74.7	1640
77.6	1720
80.5	1760
83.5	1710
86.4	1670
89.3	1650
92.2	1620
95.1	1670
98	1700
101	1760
104	1720
107	1670
110	1640
113	1650
115	1690
118	1690
121	1810
124	1850
127	1920
130	1980
133	1960
136	1980
139	1990
142	1970
144	1920
147	1840
150	1840
153	1830
156	1850
159	1880
162	1840
165	1850
168	1820
170	1880
173	1840
176	1810
179	1830
182	1920
185	1930
188	1920
191	1970
194	2010
196	2110
199	2110
202	2080
205	2140
208	2300
211	2500
214	2750
217	2840
219	2760
222	2670
225	2680
228	2820
231	2900
234	2920
237	3030
240	2970
242	2840
245	2740
248	2520
251	2450
254	2390
257	2230
260	2290
262	2360
265	2240
268	2190
271	2170
274	2070
277	1960
280	1900
282	1900
285	1850
288	1840
291	1840
294	1820
297	1830
299	1840
302	1860
305	1910
308	1950
311	2030
314	1990
317	1980
319	2020
322	2060
325	2200
328	2350
331	2520
334	2510
336	2500
339	2530
342	2420
345	2360
348	2280
351	2180
353	2030
356	1930
359	1840
362	1870
365	1900
367	1760
370	1760
373	1760
376	1780
379	1810
382	1680
384	1600
387	1710
390	1680
393	1630
396	1590
398	1660
401	1660
404	1630
407	1640
410	1660
413	1690
415	1650
418	1610
421	1600
424	1640
427	1730
429	1730
432	1600
435	1560
438	1570
441	1620
443	1630
446	1630
449	1540
452	1550
455	1620
457	1650
460	1630
463	1610
466	1620
469	1660
471	1590
474	1540
477	1590
480	1660
482	1640
485	1630
488	1600
491	1590
494	1550
496	1580
499	1660
502	1680
505	1650
508	1590
510	1600
513	1610
516	1610
519	1610
521	1570
524	1610
527	1640
530	1650
532	1640
535	1610
538	1600
541	1610
544	1610
546	1570
549	1580
552	1620
555	1610
557	1580
560	1610
563	1650
566	1610
568	1560
571	1580
574	1650
577	1640
579	1620
582	1620
585	1550
588	1630
590	1610
593	1640
596	1620
599	1540
601	1570
604	1590
607	1590
610	1570
612	1560
615	1620
618	1690
621	1620
623	1660
626	1600
629	1570
632	1610
634	1580
637	1640
640	1590
643	1620
645	1660
648	1600
651	1590
654	1610
656	1690
659	1660
662	1610
664	1570
667	1600
670	1610
673	1650
675	1660
678	1590
681	1670
684	1650
686	1630
689	1650
692	1590
694	1580
697	1570
700	1600
703	1660
705	1630
708	1610
711	1600
713	1590
716	1640
719	1620
722	1620
724	1600
727	1610
730	1640
732	1600
735	1580
738	1590
740	1600
743	1600
746	1570
749	1580
751	1640
754	1610
757	1620
759	1590
762	1620
765	1660
767	1630
770	1640
773	1630
776	1600
778	1610
781	1670
784	1620
786	1630
789	1660
792	1640
794	1600
797	1630
800	1700
802	1650
805	1610
808	1610
810	1600
813	1580
816	1660
819	1640
821	1620
824	1680
827	1670
829	1690
832	1720
835	1670
837	1560
840	1560
843	1630
845	1630
848	1600
851	1580
853	1560
856	1610
859	1740
861	1700
864	1650
867	1650
869	1630
872	1640
875	1650
877	1680
880	1600
883	1640
885	1710
888	1720
891	1660
893	1600
896	1630
898	1650
901	1710
904	1680
906	1760
909	1730
912	1630
914	1660
917	1680
920	1620
922	1650
925	1660
928	1640
930	1670
933	1730
936	1700
938	1660
941	1680
943	1630
946	1680
949	1670
951	1720
954	1790
957	1710
959	1740
962	1740
965	1710
967	1670
970	1650
972	1680
975	1790
978	1830
980	1770
983	1760
986	1800
988	1740
991	1710
993	1730
996	1770
999	1840
1000	1800
1000	1730
1010	1710
1010	1710
1010	1740
1010	1730
1020	1720
1020	1720
1020	1810
1020	1780
1030	1760
1030	1700
1030	1660
1040	1670
1040	1720
1040	1740
1040	1760
1050	1710
1050	1770
1050	1750
1050	1720
1060	1770
1060	1810
1060	1860
1060	1860
1070	1770
1070	1750
1070	1750
1070	1770
1080	1750
1080	1810
1080	1780
1080	1780
1090	1770
1090	1810
1090	1810
1100	1830
1100	1880
1100	1810
1100	1790
1110	1760
1110	1790
1110	1910
1110	1880
1120	1800
1120	1780
1120	1850
1120	1750
1130	1720
1130	1800
1130	1880
1130	1850
1140	1800
1140	1760
1140	1790
1140	1810
1150	1790
1150	1790
1150	1800
1150	1760
1160	1750
1160	1780
1160	1830
1160	1800
1170	1860
1170	1900
1170	1950
1180	1880
1180	1810
1180	1820
1180	1800
1190	1840
1190	1890
1190	1890
1190	1860
1200	1830
1200	1840
1200	1920
1200	1890
1210	1790
1210	1820
1210	1850
1210	1890
1220	1930
1220	1940
1220	1880
1220	1920
1230	1920
1230	1850
1230	1850
1230	1900
1240	1950
1240	1920
1240	1920
1240	1900
1250	1870
1250	1860
1250	1880
1250	1880
1260	1960
1260	1950
1260	1890
1260	1890
1270	1860
1270	1890
1270	1920
1270	1880
1280	1880
1280	1960
1280	1970
1280	2020
1290	2040
1290	2030
1290	2100
1290	2040
1300	1980
1300	1970
1300	1930
1310	1930
1310	1960
1310	1960
1310	1970
1320	2010
1320	2100
1320	2010
1320	1880
1330	1920
1330	2010
1330	2000
1330	2010
1340	2000
1340	2030
1340	1990
1340	1970
1350	1970
1350	1910
1350	1940
1350	1940
1360	1960
1360	1950
1360	1990
1360	2000
1370	1980
1370	1920
1370	1940
1370	1970
1380	1980
1380	1930
1380	1930
1380	1910
1390	1890
1390	1890
1390	1920
1390	1950
1400	1960
1400	1970
1400	1910
1400	1940
1410	1960
1410	1910
1410	1860
1410	1890
1420	1920
1420	1940
1420	1960
1420	1970
1430	1860
1430	1860
1430	1850
1430	1850
1440	1840
1440	1830
1440	1820
1440	1860
1450	1860
1450	1860
1450	1880
1450	1900
1460	1890
1460	1920
1460	1870
1460	1820
1470	1820
1470	1830
1470	1870
1470	1870
1480	1930
1480	1940
1480	1890
1480	1820
1480	1760
1490	1780
1490	1820
1490	1880
1490	1870
1500	1850
1500	1840
1500	1900
1500	1880
1510	1860
1510	1870
1510	1850
1510	1870
1520	1840
1520	1870
1520	1890
1520	1910
1530	1880
1530	1840
1530	1870
1530	1890
1540	1860
1540	1830
1540	1890
1540	1910
1550	2020
1550	2070
1550	2040
1550	2010
1560	1980
1560	2020
1560	1980
1560	1980
1570	2010
1570	2010
1570	2030
1570	2020
1580	1960
1580	1940
1580	1940
1580	1950
1590	1980
1590	2010
1590	2050
1590	1970
1600	1970
1600	1990
1600	1980
1600	1990
1610	1950
1610	1920
1610	1920
1610	1910
1610	1810
1620	1880
1620	1870
1620	1860
1620	1790
1630	1800
1630	1830
1630	1810
1630	1820
1640	1850
1640	1840
1640	1820
1640	1800
1650	1810
1650	1800
1650	1820
1650	1780
1660	1720
1660	1690
1660	1700
1660	1740
1670	1750
1670	1790
1670	1770
1670	1810
1680	1810
1680	1810
1680	1750
1680	1700
1690	1720
1690	1740
1690	1730
1690	1820
1690	1740
1700	1700
1700	1700
1700	1690
1700	1690
1710	1750
1710	1810
1710	1760
1710	1750
1720	1780
1720	1780
1720	1750
1720	1740
1730	1730
1730	1720
1730	1720
1730	1660
1740	1730
1740	1780
1740	1750
1740	1730
1750	1710
1750	1710
1750	1640
1750	1690
1750	1710
1760	1790
1760	1790
1760	1780
1760	1730
1770	1720
1770	1790
1770	1770
1770	1680
1780	1670
1780	1740
1780	1860
1780	1800
1790	1840
1790	1780
1790	1740
1790	1720
1800	1750
1800	1750
1800	1740
1800	1740
1800	1770
1810	1730
1810	1700
1810	1640
1810	1660
1820	1670
1820	1720
1820	1790
1820	1790
1830	1670
1830	1680
1830	1680
1830	1660
1840	1690
1840	1720
1840	1740
1840	1780
1840	1830
1850	1780
1850	1690
1850	1710
1850	1770
1860	1810
1860	1780
1860	1750
1860	1760
1870	1770
1870	1760
1870	1730
1870	1690
1880	1680
1880	1710
1880	1700
1880	1750
1890	1770
1890	1840
1890	1800
1890	1760
1890	1760
1900	1760
1900	1790
1900	1800
1900	1820
1910	1770
1910	1740
1910	1820
1910	1810
1920	1820
1920	1800
1920	1740
1920	1720
1920	1750
1930	1750
1930	1750
1930	1750
1930	1860
1940	2570
1940	1850
1940	1750
1940	1750
1950	1760
1950	1740
1950	1820
1950	1800
1960	1820
1960	1770
1960	1760
1960	1730
1960	1720
1970	1740
1970	1780
1970	1790
1970	1790
1980	1750
1980	1740
1980	1750
1980	1700
1990	1760
1990	1820
1990	1800
1990	1770
1990	1800
2000	1790
2000	1760
2000	1780
2000	1740
2010	1740
2010	1810
2010	1840
2010	1800
2020	1800
2020	1750
2020	1700
2020	1700
2020	1730
2030	1750
2030	1800
2030	1830
2030	1820
2040	1760
2040	1770
2040	1810
2040	1780
2050	1770
2050	1810
2050	1830
2050	1790
2050	1750
2060	1700
2060	1760
2060	1800
2060	1810
2070	1830
2070	1780
2070	1770
2070	1810
2080	1840
2080	1800
2080	1790
2080	2260
2080	1940
2090	1840
2090	1860
2090	1850
2090	1860
2100	1770
2100	1810
2100	1830
2100	1780
2110	1780
2110	1760
2110	1750
2110	1770
2110	1860
2120	1870
2120	1810
2120	1840
2120	1850
2130	1820
2130	1820
2130	1810
2130	1830
2130	1790
2140	1780
2140	1760
2140	1770
2140	1800
2150	1770
2150	1760
2150	1800
2150	1780
2160	1770
2160	1740
2160	1750
2160	1790
2160	1830
2170	1860
2170	1890
2170	1880
2170	1800
2180	1760
2180	1760
2180	1810
2180	1870
2180	1880
2190	1890
2190	1770
2190	1700
2190	1810
2200	1990
2200	2130
2200	1980
2200	1960
2200	2000
2210	2100
2210	2050
2210	2230
2210	2320
2220	2570
2220	1850
2220	1780
2220	1780
2230	1860
2230	1870
2230	1860
2230	1850
2230	1910
2240	1880
2240	1850
2240	1830
2240	1850
2250	1820
2250	1770
2250	1790
2250	1860
2250	1870
2260	1940
2260	1900
2260	1850
2260	1730
2270	1770
2270	1770
2270	1840
2270	2270
2270	2340
2280	1860
2280	1840
2280	1830
2280	1810
2290	1810
2290	1810
2290	1770
2290	1820
2290	1810
2300	1860
2300	1850
2300	1810
2300	1780
2310	1810
2310	1820
2310	1810
2310	1880
2310	1820
2320	1830
2320	1910
2320	1870
2320	1900
2330	1880
2330	1880
2330	1880
2330	1890
2330	1880
2340	1870
2340	1870
2340	1880
2340	1870
2350	1890
2350	1850
2350	1860
2350	1900
2350	1960
2360	1920
2360	1900
2360	1890
2360	1830
2370	1870
2370	1840
2370	1850
2370	1840
2370	1890
2380	1920
2380	1930
2380	1960
2380	1940
2390	1970
2390	1930
2390	1890
2390	1880
2390	1850
2400	1870
2400	1810
2400	1870
2400	1910
2410	1880
2410	1900
2410	1900
2410	1860
2410	1920
2420	1920
2420	1900
2420	1920
2420	1950
2420	1960
2430	1910
2430	1890
2430	1880
2430	1890
2440	1860
2440	1850
2440	1870
2440	1910
2440	1930
2450	1920
2450	1880
2450	1940
2450	1930
2460	1890
2460	1930
2460	1960
2460	1990
2460	2000
2470	1960
2470	1970
2470	1950
2470	1860
2480	1840
2480	1930
2480	1970
2480	1960
2480	1960
2490	1970
2490	1980
2490	1970
2490	2020
2490	2000
2500	2030
2500	2050
2500	2010
2500	1940
2510	1890
2510	1930
2510	1960
2510	2020
2510	1990
2520	1970
2520	1970
2520	1970
2520	1990
2530	1970
2530	2010
2530	1980
2530	1970
2530	2040
2540	2030
2540	2020
2540	1950
2540	1950
2540	1980
2550	2040
2550	2030
2550	2030
2550	2040
2560	1990
2560	1940
2560	2010
2560	2010
2560	1940
2570	1960
2570	2040
2570	2040
2570	2080
2570	2090
2580	2000
2580	1980
2580	2040
2580	2070
2590	2070
2590	2060
2590	2020
2590	1970
2590	1970
2600	2030
2600	2080
2600	2180
2600	2080
2600	2130
2610	2160
2610	2160
2610	2100
2610	2060
2620	2010
2620	1990
2620	2030
2620	2120
2620	2160
2630	2130
2630	2040
2630	2000
2630	2130
2630	2190
2640	2160
2640	2010
2640	1940
2640	1960
2650	1980
2650	2010
2650	2060
2650	2050
2650	2030
2660	1980
2660	2030
2660	2140
2660	2150
2660	2170
2670	2170
2670	2160
2670	2040
2670	2070
2670	2100
2680	2110
2680	2150
2680	2160
2680	2060
2690	2090
2690	2080
2690	2040
2690	2060
2690	2110
2700	2090
2700	2100
2700	2100
2700	2120
2700	2100
2710	2070
2710	2130
2710	2080
2710	2050
2710	2020
2720	2000
2720	2080
2720	2120
2720	2120
2730	2130
2730	2150
2730	2100
2730	1970
2730	2040
2740	2080
2740	2140
2740	2200
2740	2190
2740	2200
2750	2210
2750	2090
2750	2120
2750	2150
2750	2130
2760	2120
2760	2070
2760	2070
2760	2040
2770	2050
2770	2070
2770	2100
2770	2170
2770	2160
2780	2150
2780	2120
2780	2170
2780	2110
2780	2050
2790	2030
2790	2060
2790	2130
2790	2160
2790	2160
2800	2120
2800	2020
2800	2000
2800	2010
2800	2030
2810	2060
2810	2050
2810	2090
2810	2080
2820	2090
2820	2010
2820	2010
2820	2110
2820	2100
2830	2100
2830	2160
2830	2150
2830	2070
2830	2030
2840	2010
2840	2060
2840	2060
2840	2050
2840	2070
2850	2120
2850	2110
2850	2070
2850	2030
2850	1980
2860	1960
2860	2010
2860	2060
2860	2030
2870	1980
2870	2010
2870	2020
2870	1950
2870	1950
2880	1960
2880	2040
2880	2060
2880	2100
2880	2060
2890	2030
2890	1990
2890	1960
2890	2010
2890	2030
2900	2020
2900	1990
2900	1980
2900	1970
2900	1980
2910	1900
2910	1890
2910	1900
2910	2030
2910	2090
2920	2100
2920	2090
2920	2140
2920	2090
2920	2050
2930	2010
2930	1960
2930	1920
2930	1930
2930	1970
2940	1970
2940	2030
2940	2020
2940	2070
2950	2030
2950	2040
2950	2200
2950	2280
2950	2210
2960	2010
2960	2010
2960	1990
2960	1970
2960	1910
2970	1860
2970	1920
2970	1960
2970	1980
2970	1990
2980	2020
2980	2040
2980	1980
2980	1920
2980	2020
2990	2050
2990	2060
2990	2060
2990	1990
2990	1970
3000	1910
3000	1930
3000	1940
3000	1940
3000	2000
3010	2110
3010	2050
3010	1950
3010	1950
3010	1970
3020	1920
3020	1940
3020	1950
3020	2010
3020	1960
3030	1950
3030	1920
3030	1920
3030	1930
3030	1980
3040	1990
3040	2010
3040	1930
3040	1930
3040	1940
3050	1930
3050	1920
3050	2000
3050	1940
3050	1920
3060	1970
3060	1970
3060	1880
3060	1920
3060	2040
3070	2270
3070	1910
3070	1910
3070	1910
3070	1900
3080	1900
3080	1800
3080	1860
3080	1890
3080	1930
3090	1910
3090	1940
3090	1920
3090	1840
3090	1780
3100	1770
3100	1850
3100	1870
3100	1890
3100	1910
3110	1910
3110	1930
3110	1950
3110	1970
3110	1940
3120	1940
3120	1890
3120	1860
3120	1930
3120	1980
3130	1910
3130	1870
3130	1820
3130	1870
3130	1900
3140	1920
3140	1920
3140	1900
3140	1950
3140	2080
3150	1900
3150	1830
3150	1810
3150	1910
3150	1890
3160	1850
3160	1840
3160	1870
3160	1880
3160	1980
3170	1980
3170	1920
3170	1890
3170	1780
3170	1720
3180	1730
3180	1820
3180	1880
3180	1900
3180	1890
3190	1840
3190	1820
3190	1880
3190	1830
3190	1850
3200	1910
3200	1900
3200	1850
3200	1790
3200	1770
3210	1790
3210	1790
3210	1860
3210	1860
3210	1880
3220	1880
3220	1870
3220	1880
3220	1900
3220	1910
3230	1870
3230	1840
3230	1820
3230	1790
3230	1790
3230	1820
3240	1860
3240	1920
3240	1900
3240	1840
3240	1840
3250	1850
3250	1860
3250	1800
3250	1780
3250	1750
3260	1800
3260	1830
3260	1800
3260	1790
3260	1800
3270	1790
3270	1800
3270	1780
3270	1770
3270	1810
3280	1800
3280	1780
3280	1700
3280	1760
3280	1730
3290	1740
3290	1810
3290	1770
3290	1780
3290	1830
3300	1900
3300	1840
3300	1730
3300	1770
3300	1830
3310	1780
3310	1810
3310	1810
3310	1830
3310	1880
3310	1900
3320	1840
3320	1790
3320	1760
3320	1820
3320	1810
3330	1800
3330	1770
3330	1740
3330	1790
3330	1820
3340	1820
3340	1830
3340	1840
3340	1830
3340	1780
3350	1780
3350	1810
3350	1840
3350	1810
3350	1820
3360	1850
3360	1800
3360	1780
3360	1770
3360	1800
3360	1780
3370	1680
3370	1710
3370	1780
3370	1750
3370	1750
3380	1760
3380	1740
3380	1780
3380	1830
3380	1870
3390	1790
3390	1800
3390	1780
3390	1800
3390	1750
3400	1710
3400	1780
3400	1840
3400	1800
3400	1780
3410	1780
3410	1780
3410	1790
3410	1780
3410	1820
3410	1790
3420	1840
3420	1790
3420	1740
3420	1790
3420	1740
3430	1740
3430	1770
3430	1790
3430	1760
3430	1790
3440	1830
3440	1820
3440	1800
3440	1800
3440	1740
3450	1760
3450	1780
3450	1760
3450	1750
3450	1730
3450	1710
3460	1690
3460	1690
3460	1720
3460	1700
3460	1730
3470	1800
3470	1750
3470	1690
3470	1700
3470	1770
3480	1780
3480	1780
3480	1810
3480	1810
3480	1710
3480	1670
3490	1670
3490	1750
3490	1770
3490	1720
3490	1770
3500	1800
3500	1770
3500	1800
3500	1780
3500	1770
3510	1770
3510	1760
3510	1780
3510	1730
3510	1740
3520	1700
3520	1690
3520	1650
3520	1670
3520	1710
3520	1740
3530	1730
3530	1700
3530	1700
3530	1740
3530	1720
3540	1750
3540	1740
3540	1720
3540	1680
3540	1670
3550	1770
3550	1760
3550	1740
3550	1840
3550	1870
3550	1820
3560	1830
3560	1830
3560	1830
3560	1740
3560	1730
3570	1760
3570	1760
3570	1800
3570	1710
3570	1750
3580	1770
3580	1750
3580	1760
3580	1810
3580	1780
3580	1750
3590	1790
3590	1790
3590	1730
3590	1710
3590	1800
3600	1830
3600	1790
3600	1740
3600	1700
3600	1700
3600	1720
3610	1720
3610	1730
3610	1740
3610	1760
3610	1790
3620	1760
3620	1770
3620	1760
3620	1820
3620	1800
3630	1830
3630	1820
3630	1760
3630	1740
3630	1790
3630	1750
3640	1770
3640	1740
3640	1760
3640	1750
3640	1840
3650	1790
3650	1750
3650	1760
3650	1740
3650	1710
3650	1780
3660	1810
3660	1770
3660	1750
3660	1710
3660	1770
3670	1750
3670	1760
3670	1790
3670	1720
3670	1710
3670	1740
3680	1750
3680	1800
3680	1780
3680	1800
3680	1810
3690	1790
3690	1790
3690	1740
3690	1710
3690	1700
3700	1690
3700	1740
3700	1730
3700	1770
3700	1840
3700	1790
3710	1750
3710	1730
3710	1720
3710	1720
3710	1710
3720	1750
3720	1780
3720	1780
3720	1790
3720	1790
3720	1720
3730	1690
3730	1670
3730	1760
3730	1770
3730	1740
3740	1710
3740	1660
3740	1640
3740	1660
3740	1710
3740	1760
3750	1770
3750	1730
3750	1760
3750	1740
3750	1750
3760	1740
3760	1680
3760	1760
3760	1730

## Sheet: 10247 Todorokite
rel. 1/cm	CCD cts
-72.4	521
-69.5	516
-66.5	517
-63.5	517
-60.6	525
-57.6	521
-54.6	527
-51.7	529
-48.7	532
-45.8	537
-42.8	551
-39.8	556
-36.9	601
-33.9	768
-31	1360
-28	2490
-25.1	3220
-22.1	3820
-19.2	3850
-16.2	4820
-13.3	5080
-10.3	4750
-7.39	5040
-4.45	4140
-1.5	3960
1.44	3920
4.38	3640
7.32	2520
10.3	2500
13.2	1820
16.1	996
19.1	623
22	538
25	524
27.9	517
30.8	521
33.8	522
36.7	528
39.6	518
42.5	517
45.5	517
48.4	526
51.3	525
54.3	543
57.2	580
60.1	646
63	762
65.9	868
68.9	993
71.8	1090
74.7	1140
77.6	1180
80.5	1190
83.5	1200
86.4	1170
89.3	1150
92.2	1110
95.1	1100
98	1130
101	1140
104	1140
107	1120
110	1110
113	1120
115	1120
118	1100
121	1140
124	1120
127	1140
130	1120
133	1100
136	1130
139	1110
142	1100
144	1090
147	1090
150	1100
153	1110
156	1100
159	1090
162	1060
165	1070
168	1080
170	1090
173	1080
176	1060
179	1050
182	1080
185	1070
188	1080
191	1070
194	1060
196	1080
199	1070
202	1050
205	1040
208	1040
211	1050
214	1080
217	1080
219	1050
222	1040
225	1070
228	1080
231	1120
234	1090
237	1070
240	1050
242	1090
245	1110
248	1100
251	1110
254	1130
257	1100
260	1090
262	1140
265	1140
268	1140
271	1150
274	1150
277	1140
280	1160
282	1140
285	1140
288	1110
291	1120
294	1180
297	1170
299	1150
302	1120
305	1140
308	1140
311	1140
314	1100
317	1120
319	1110
322	1120
325	1150
328	1170
331	1170
334	1190
336	1200
339	1200
342	1160
345	1160
348	1160
351	1180
353	1120
356	1090
359	1070
362	1080
365	1080
367	1050
370	1060
373	1050
376	1030
379	1010
382	988
384	977
387	983
390	987
393	988
396	986
398	987
401	989
404	990
407	968
410	968
413	997
415	978
418	961
421	969
424	997
427	1030
429	1020
432	978
435	998
438	979
441	1000
443	1020
446	1010
449	977
452	967
455	990
457	995
460	1000
463	991
466	999
469	1010
471	989
474	982
477	996
480	990
482	998
485	1020
488	1040
491	1010
494	995
496	975
499	1020
502	1010
505	1010
508	1020
510	1040
513	1030
516	1040
519	1030
521	1010
524	1040
527	1060
530	1090
532	1050
535	1060
538	1090
541	1070
544	1090
546	1120
549	1130
552	1140
555	1120
557	1130
560	1180
563	1170
566	1180
568	1190
571	1180
574	1220
577	1220
579	1250
582	1260
585	1300
588	1350
590	1360
593	1410
596	1440
599	1480
601	1580
604	1670
607	1700
610	1790
612	1900
615	2010
618	2210
621	2290
623	2400
626	2450
629	2530
632	2510
634	2350
637	2310
640	2170
643	2100
645	2050
648	1830
651	1720
654	1630
656	1600
659	1520
662	1450
664	1370
667	1340
670	1320
673	1280
675	1200
678	1170
681	1160
684	1160
686	1150
689	1140
692	1090
694	1060
697	1020
700	1010
703	1040
705	1050
708	1010
711	1000
713	996
716	968
719	971
722	969
724	941
727	935
730	960
732	943
735	933
738	917
740	919
743	916
746	895
749	890
751	895
754	884
757	889
759	875
762	887
765	904
767	886
770	871
773	864
776	856
778	849
781	853
784	819
786	835
789	858
792	847
794	839
797	819
800	841
802	822
805	825
808	834
810	825
813	810
816	800
819	819
821	806
824	815
827	809
829	835
832	839
835	808
837	799
840	787
843	794
845	782
848	791
851	782
853	786
856	783
859	810
861	805
864	802
867	783
869	787
872	783
875	799
877	806
880	786
883	797
885	781
888	795
891	788
893	772
896	774
898	765
901	802
904	792
906	807
909	789
912	799
914	796
917	782
920	769
922	786
925	770
928	769
930	770
933	783
936	777
938	782
941	766
943	762
946	762
949	762
951	784
954	785
957	756
959	772
962	762
965	762
967	757
970	741
972	735
975	749
978	764
980	765
983	771
986	763
988	759
991	751
993	751
996	757
999	746
1000	752
1000	759
1010	751
1010	758
1010	748
1010	752
1020	746
1020	737
1020	740
1020	741
1030	754
1030	741
1030	737
1040	742
1040	731
1040	742
1040	749
1050	748
1050	739
1050	736
1050	734
1060	733
1060	755
1060	752
1060	754
1070	751
1070	750
1070	748
1070	752
1080	734
1080	741
1080	742
1080	751
1090	750
1090	738
1090	742
1100	754
1100	762
1100	770
1100	763
1110	748
1110	745
1110	752
1110	751
1120	754
1120	742
1120	765
1120	753
1130	730
1130	757
1130	749
1130	750
1140	743
1140	747
1140	738
1140	744
1150	733
1150	739
1150	735
1150	733
1160	724
1160	725
1160	740
1160	742
1170	730
1170	740
1170	741
1180	732
1180	746
1180	736
1180	743
1190	747
1190	748
1190	740
1190	741
1200	726
1200	726
1200	725
1200	727
1210	725
1210	722
1210	722
1210	729
1220	711
1220	731
1220	708
1220	731
1230	723
1230	732
1230	725
1230	720
1240	723
1240	715
1240	715
1240	713
1250	707
1250	719
1250	716
1250	708
1260	712
1260	701
1260	712
1260	693
1270	684
1270	688
1270	696
1270	689
1280	698
1280	697
1280	693
1280	697
1290	703
1290	680
1290	692
1290	699
1300	686
1300	694
1300	684
1310	681
1310	678
1310	668
1310	677
1320	693
1320	684
1320	660
1320	669
1330	655
1330	669
1330	663
1330	659
1340	662
1340	659
1340	671
1340	656
1350	659
1350	656
1350	649
1350	645
1360	650
1360	658
1360	651
1360	661
1370	658
1370	649
1370	636
1370	646
1380	652
1380	646
1380	636
1380	647
1390	635
1390	641
1390	640
1390	643
1400	643
1400	642
1400	643
1400	645
1410	633
1410	633
1410	639
1410	654
1420	646
1420	631
1420	637
1420	643
1430	639
1430	621
1430	632
1430	629
1440	623
1440	634
1440	628
1440	633
1450	628
1450	627
1450	624
1450	640
1460	631
1460	630
1460	626
1460	620
1470	624
1470	627
1470	633
1470	626
1480	629
1480	623
1480	629
1480	628
1480	624
1490	619
1490	607
1490	620
1490	615
1500	618
1500	622
1500	619
1500	616
1510	625
1510	619
1510	618
1510	619
1520	625
1520	615
1520	627
1520	619
1530	613
1530	620
1530	610
1530	616
1540	606
1540	609
1540	612
1540	614
1550	619
1550	629
1550	624
1550	610
1560	621
1560	609
1560	611
1560	617
1570	623
1570	605
1570	613
1570	616
1580	605
1580	600
1580	604
1580	610
1590	615
1590	612
1590	605
1590	603
1600	609
1600	607
1600	613
1600	621
1610	612
1610	610
1610	605
1610	610
1610	615
1620	606
1620	606
1620	608
1620	602
1630	604
1630	607
1630	613
1630	600
1640	609
1640	623
1640	612
1640	620
1650	613
1650	611
1650	624
1650	609
1660	606
1660	611
1660	610
1660	616
1670	610
1670	608
1670	621
1670	607
1680	616
1680	605
1680	612
1680	605
1690	605
1690	603
1690	608
1690	616
1690	608
1700	599
1700	602
1700	606
1700	599
1710	599
1710	610
1710	601
1710	612
1720	603
1720	604
1720	599
1720	600
1730	597
1730	605
1730	611
1730	592
1740	599
1740	610
1740	597
1740	594
1750	600
1750	599
1750	609
1750	600
1750	610
1760	604
1760	607
1760	597
1760	591
1770	597
1770	601
1770	594
1770	599
1780	597
1780	611
1780	607
1780	615
1790	608
1790	608
1790	605
1790	603
1800	595
1800	599
1800	603
1800	608
1800	602
1810	596
1810	603
1810	591
1810	606
1820	596
1820	600
1820	595
1820	610
1830	588
1830	595
1830	597
1830	597
1840	590
1840	590
1840	603
1840	597
1840	599
1850	605
1850	597
1850	599
1850	604
1860	598
1860	595
1860	594
1860	602
1870	597
1870	597
1870	596
1870	596
1880	590
1880	591
1880	600
1880	595
1890	590
1890	593
1890	594
1890	593
1890	594
1900	589
1900	592
1900	598
1900	609
1910	591
1910	582
1910	593
1910	600
1920	602
1920	596
1920	587
1920	592
1920	594
1930	584
1930	590
1930	592
1930	588
1940	591
1940	595
1940	586
1940	590
1950	588
1950	584
1950	590
1950	582
1960	586
1960	593
1960	594
1960	591
1960	589
1970	593
1970	595
1970	587
1970	581
1980	586
1980	595
1980	600
1980	583
1990	586
1990	587
1990	583
1990	581
1990	594
2000	586
2000	591
2000	594
2000	584
2010	577
2010	589
2010	589
2010	596
2020	592
2020	581
2020	586
2020	580
2020	587
2030	576
2030	584
2030	589
2030	590
2040	582
2040	581
2040	593
2040	590
2050	589
2050	584
2050	595
2050	579
2050	589
2060	587
2060	574
2060	592
2060	589
2070	582
2070	587
2070	581
2070	589
2080	592
2080	595
2080	586
2080	582
2080	579
2090	585
2090	586
2090	590
2090	589
2100	577
2100	589
2100	581
2100	588
2110	584
2110	576
2110	580
2110	587
2110	581
2120	579
2120	575
2120	587
2120	582
2130	578
2130	581
2130	587
2130	587
2130	585
2140	577
2140	579
2140	579
2140	583
2150	577
2150	574
2150	590
2150	586
2160	574
2160	582
2160	586
2160	578
2160	584
2170	590
2170	580
2170	588
2170	584
2180	575
2180	585
2180	580
2180	581
2180	586
2190	590
2190	584
2190	570
2190	576
2200	580
2200	575
2200	573
2200	570
2200	579
2210	583
2210	583
2210	588
2210	579
2220	582
2220	582
2220	577
2220	573
2230	586
2230	582
2230	580
2230	587
2230	586
2240	582
2240	578
2240	583
2240	584
2250	576
2250	578
2250	578
2250	592
2250	582
2260	579
2260	580
2260	586
2260	576
2270	579
2270	572
2270	571
2270	590
2270	582
2280	575
2280	581
2280	573
2280	575
2290	572
2290	572
2290	582
2290	583
2290	581
2300	575
2300	578
2300	580
2300	582
2310	581
2310	576
2310	579
2310	575
2310	580
2320	582
2320	581
2320	580
2320	587
2330	577
2330	582
2330	574
2330	583
2330	574
2340	581
2340	577
2340	581
2340	581
2350	584
2350	571
2350	578
2350	573
2350	582
2360	582
2360	585
2360	581
2360	572
2370	580
2370	593
2370	584
2370	582
2370	577
2380	580
2380	583
2380	586
2380	585
2390	583
2390	590
2390	576
2390	579
2390	573
2400	575
2400	579
2400	572
2400	576
2410	583
2410	582
2410	580
2410	584
2410	575
2420	587
2420	579
2420	578
2420	585
2420	580
2430	581
2430	580
2430	579
2430	581
2440	581
2440	574
2440	578
2440	573
2440	582
2450	577
2450	579
2450	570
2450	580
2460	578
2460	585
2460	583
2460	578
2460	579
2470	579
2470	588
2470	577
2470	570
2480	575
2480	577
2480	576
2480	578
2480	577
2490	582
2490	580
2490	569
2490	580
2490	579
2500	580
2500	572
2500	576
2500	574
2510	576
2510	574
2510	578
2510	579
2510	575
2520	579
2520	578
2520	577
2520	582
2530	575
2530	583
2530	580
2530	580
2530	578
2540	581
2540	578
2540	586
2540	579
2540	573
2550	581
2550	583
2550	587
2550	575
2560	572
2560	580
2560	581
2560	579
2560	576
2570	582
2570	581
2570	585
2570	583
2570	581
2580	578
2580	582
2580	577
2580	589
2590	578
2590	591
2590	579
2590	574
2590	587
2600	576
2600	584
2600	590
2600	577
2600	576
2610	578
2610	583
2610	581
2610	586
2620	576
2620	569
2620	579
2620	584
2620	588
2630	589
2630	581
2630	574
2630	577
2630	583
2640	587
2640	578
2640	579
2640	576
2650	575
2650	579
2650	580
2650	580
2650	579
2660	581
2660	571
2660	578
2660	584
2660	590
2670	584
2670	600
2670	585
2670	582
2670	582
2680	585
2680	577
2680	591
2680	580
2690	575
2690	581
2690	574
2690	580
2690	580
2700	580
2700	584
2700	586
2700	584
2700	576
2710	577
2710	583
2710	576
2710	577
2710	573
2720	581
2720	569
2720	588
2720	578
2730	580
2730	575
2730	579
2730	573
2730	578
2740	580
2740	583
2740	590
2740	583
2740	584
2750	576
2750	576
2750	581
2750	586
2750	586
2760	573
2760	578
2760	573
2760	578
2770	573
2770	579
2770	585
2770	574
2770	586
2780	585
2780	582
2780	575
2780	579
2780	578
2790	571
2790	580
2790	576
2790	583
2790	580
2800	580
2800	573
2800	570
2800	578
2800	572
2810	570
2810	580
2810	578
2810	584
2820	576
2820	579
2820	573
2820	576
2820	573
2830	579
2830	577
2830	578
2830	568
2830	576
2840	576
2840	577
2840	574
2840	571
2840	577
2850	569
2850	573
2850	576
2850	573
2850	573
2860	577
2860	575
2860	567
2860	576
2870	570
2870	579
2870	568
2870	568
2870	565
2880	570
2880	576
2880	575
2880	577
2880	573
2890	576
2890	567
2890	569
2890	573
2890	574
2900	572
2900	571
2900	570
2900	570
2900	574
2910	565
2910	570
2910	568
2910	577
2910	577
2920	573
2920	573
2920	569
2920	572
2920	581
2930	575
2930	567
2930	568
2930	566
2930	570
2940	571
2940	564
2940	568
2940	571
2950	562
2950	568
2950	577
2950	575
2950	570
2960	573
2960	572
2960	574
2960	560
2960	566
2970	567
2970	572
2970	564
2970	563
2970	578
2980	571
2980	571
2980	569
2980	568
2980	572
2990	576
2990	566
2990	577
2990	568
2990	573
3000	566
3000	567
3000	569
3000	568
3000	569
3010	573
3010	580
3010	576
3010	568
3010	573
3020	573
3020	572
3020	575
3020	566
3020	567
3030	572
3030	574
3030	569
3030	573
3030	566
3040	565
3040	560
3040	562
3040	571
3040	568
3050	568
3050	561
3050	567
3050	570
3050	560
3060	570
3060	570
3060	575
3060	559
3060	569
3070	562
3070	566
3070	561
3070	566
3070	560
3080	575
3080	570
3080	565
3080	567
3080	570
3090	564
3090	565
3090	569
3090	570
3090	552
3100	559
3100	568
3100	564
3100	570
3100	567
3110	572
3110	564
3110	567
3110	570
3110	569
3120	561
3120	575
3120	561
3120	566
3120	576
3130	564
3130	568
3130	564
3130	567
3130	562
3140	569
3140	570
3140	562
3140	567
3140	568
3150	559
3150	564
3150	564
3150	570
3150	568
3160	562
3160	557
3160	558
3160	564
3160	565
3170	561
3170	568
3170	566
3170	561
3170	556
3180	561
3180	564
3180	558
3180	563
3180	571
3190	564
3190	564
3190	574
3190	558
3190	568
3200	569
3200	570
3200	561
3200	560
3200	557
3210	554
3210	562
3210	558
3210	559
3210	561
3220	564
3220	561
3220	562
3220	566
3220	564
3230	568
3230	561
3230	559
3230	557
3230	560
3230	563
3240	560
3240	567
3240	567
3240	561
3240	565
3250	562
3250	566
3250	561
3250	559
3250	556
3260	558
3260	559
3260	568
3260	568
3260	562
3270	565
3270	562
3270	555
3270	565
3270	566
3280	559
3280	561
3280	560
3280	575
3280	556
3290	554
3290	565
3290	562
3290	572
3290	569
3300	564
3300	557
3300	565
3300	561
3300	567
3310	558
3310	563
3310	564
3310	558
3310	578
3310	578
3320	572
3320	574
3320	561
3320	561
3320	560
3330	558
3330	555
3330	560
3330	567
3330	562
3340	565
3340	559
3340	561
3340	569
3340	563
3350	567
3350	561
3350	566
3350	566
3350	561
3360	557
3360	563
3360	563
3360	563
3360	567
3360	559
3370	560
3370	562
3370	559
3370	561
3370	561
3380	556
3380	556
3380	557
3380	563
3380	562
3390	568
3390	567
3390	561
3390	571
3390	560
3400	560
3400	562
3400	568
3400	564
3400	565
3410	557
3410	565
3410	565
3410	560
3410	568
3410	562
3420	561
3420	567
3420	559
3420	560
3420	561
3430	566
3430	560
3430	556
3430	558
3430	563
3440	563
3440	561
3440	559
3440	560
3440	550
3450	566
3450	566
3450	559
3450	562
3450	573
3450	561
3460	562
3460	563
3460	555
3460	553
3460	568
3470	559
3470	562
3470	555
3470	563
3470	572
3480	558
3480	558
3480	567
3480	563
3480	562
3480	556
3490	552
3490	564
3490	560
3490	561
3490	561
3500	563
3500	565
3500	561
3500	570
3500	563
3510	571
3510	558
3510	553
3510	560
3510	564
3520	562
3520	558
3520	564
3520	561
3520	555
3520	566
3530	557
3530	555
3530	554
3530	559
3530	560
3540	558
3540	560
3540	554
3540	553
3540	562
3550	565
3550	551
3550	566
3550	566
3550	570
3550	566
3560	571
3560	571
3560	577
3560	561
3560	563
3570	559
3570	564
3570	569
3570	559
3570	557
3580	567
3580	561
3580	560
3580	557
3580	569
3580	564
3590	565
3590	564
3590	566
3590	555
3590	556
3600	561
3600	561
3600	563
3600	563
3600	561
3600	559
3610	560
3610	564
3610	565
3610	567
3610	572
3620	562
3620	560
3620	564
3620	562
3620	568
3630	567
3630	562
3630	566
3630	565
3630	560
3630	557
3640	570
3640	561
3640	566
3640	554
3640	586
3650	560
3650	563
3650	565
3650	566
3650	566
3650	563
3660	558
3660	574
3660	555
3660	563
3660	563
3670	563
3670	566
3670	561
3670	564
3670	565
3670	561
3680	568
3680	563
3680	570
3680	561
3680	568
3690	578
3690	565
3690	567
3690	560
3690	558
3700	562
3700	574
3700	563
3700	563
3700	576
3700	567
3710	558
3710	565
3710	562
3710	564
3710	555
3720	573
3720	569
3720	570
3720	568
3720	575
3720	567
3730	563
3730	559
3730	560
3730	564
3730	564
3740	564
3740	566
3740	558
3740	555
3740	566
3740	564
3750	559
3750	564
3750	563
3750	566
3750	565
3760	561
3760	563
3760	564
3760	562

## Sheet: 10247 2D
rel. 1/cm	CCD cts
-7.24E+01	6.27E+02
-6.95E+01	6.39E+02
-6.65E+01	6.45E+02
-6.35E+01	6.36E+02
-6.06E+01	6.49E+02
-5.76E+01	6.45E+02
-5.46E+01	6.52E+02
-5.17E+01	6.53E+02
-4.87E+01	6.49E+02
-4.58E+01	6.72E+02
-4.28E+01	6.72E+02
-3.98E+01	6.91E+02
-3.69E+01	7.19E+02
-3.39E+01	8.90E+02
-3.10E+01	1.42E+03
-2.80E+01	2.40E+03
-2.51E+01	2.87E+03
-2.21E+01	3.78E+03
-1.92E+01	3.71E+03
-1.62E+01	4.37E+03
-1.33E+01	4.29E+03
-1.03E+01	4.21E+03
-7.39E+00	4.44E+03
-4.45E+00	4.45E+03
-1.50E+00	3.86E+03
1.44E+00	2.90E+03
4.38E+00	3.06E+03
7.32E+00	3.09E+03
1.03E+01	2.58E+03
1.32E+01	1.58E+03
1.61E+01	1.10E+03
1.91E+01	7.70E+02
2.20E+01	6.89E+02
2.50E+01	6.86E+02
2.79E+01	6.71E+02
3.08E+01	6.84E+02
3.38E+01	6.90E+02
3.67E+01	6.88E+02
3.96E+01	6.86E+02
4.25E+01	6.90E+02
4.55E+01	7.01E+02
4.84E+01	7.34E+02
5.13E+01	7.90E+02
5.43E+01	9.67E+02
5.72E+01	1.35E+03
6.01E+01	1.94E+03
6.30E+01	2.82E+03
6.59E+01	4.06E+03
6.89E+01	5.33E+03
7.18E+01	6.33E+03
7.47E+01	6.81E+03
7.76E+01	7.29E+03
8.05E+01	7.34E+03
8.35E+01	7.27E+03
8.64E+01	7.13E+03
8.93E+01	6.99E+03
9.22E+01	6.99E+03
9.51E+01	6.95E+03
9.80E+01	6.97E+03
1.01E+02	7.25E+03
1.04E+02	7.30E+03
1.07E+02	7.10E+03
1.10E+02	6.96E+03
1.13E+02	6.81E+03
1.15E+02	6.77E+03
1.18E+02	6.77E+03
1.21E+02	6.98E+03
1.24E+02	7.24E+03
1.27E+02	7.20E+03
1.30E+02	7.31E+03
1.33E+02	7.20E+03
1.36E+02	7.27E+03
1.39E+02	7.21E+03
1.42E+02	7.12E+03
1.44E+02	6.95E+03
1.47E+02	6.99E+03
1.50E+02	7.06E+03
1.53E+02	7.08E+03
1.56E+02	7.11E+03
1.59E+02	7.29E+03
1.62E+02	7.23E+03
1.65E+02	7.08E+03
1.68E+02	7.13E+03
1.70E+02	7.18E+03
1.73E+02	7.08E+03
1.76E+02	6.95E+03
1.79E+02	7.00E+03
1.82E+02	7.13E+03
1.85E+02	7.35E+03
1.88E+02	7.46E+03
1.91E+02	7.49E+03
1.94E+02	7.37E+03
1.96E+02	7.21E+03
1.99E+02	7.04E+03
2.02E+02	6.78E+03
2.05E+02	6.80E+03
2.08E+02	6.83E+03
2.11E+02	6.99E+03
2.14E+02	7.24E+03
2.17E+02	7.37E+03
2.19E+02	7.15E+03
2.22E+02	7.06E+03
2.25E+02	7.08E+03
2.28E+02	7.17E+03
2.31E+02	7.49E+03
2.34E+02	7.37E+03
2.37E+02	7.53E+03
2.40E+02	7.38E+03
2.42E+02	7.35E+03
2.45E+02	7.34E+03
2.48E+02	7.33E+03
2.51E+02	7.26E+03
2.54E+02	7.01E+03
2.57E+02	6.81E+03
2.60E+02	6.99E+03
2.62E+02	7.25E+03
2.65E+02	7.39E+03
2.68E+02	7.40E+03
2.71E+02	7.55E+03
2.74E+02	7.65E+03
2.77E+02	7.37E+03
2.80E+02	7.36E+03
2.82E+02	7.31E+03
2.85E+02	7.18E+03
2.88E+02	6.98E+03
2.91E+02	6.97E+03
2.94E+02	7.10E+03
2.97E+02	7.16E+03
2.99E+02	7.36E+03
3.02E+02	7.30E+03
3.05E+02	7.32E+03
3.08E+02	7.14E+03
3.11E+02	7.27E+03
3.14E+02	7.15E+03
3.17E+02	6.97E+03
3.19E+02	7.07E+03
3.22E+02	7.21E+03
3.25E+02	7.28E+03
3.28E+02	7.27E+03
3.31E+02	7.49E+03
3.34E+02	7.56E+03
3.36E+02	7.57E+03
3.39E+02	7.56E+03
3.42E+02	7.57E+03
3.45E+02	7.37E+03
3.48E+02	7.50E+03
3.51E+02	7.51E+03
3.53E+02	7.27E+03
3.56E+02	7.10E+03
3.59E+02	6.75E+03
3.62E+02	6.87E+03
3.65E+02	7.39E+03
3.67E+02	7.36E+03
3.70E+02	7.62E+03
3.73E+02	7.68E+03
3.76E+02	7.34E+03
3.79E+02	7.37E+03
3.82E+02	7.18E+03
3.84E+02	7.00E+03
3.87E+02	7.20E+03
3.90E+02	7.41E+03
3.93E+02	7.41E+03
3.96E+02	7.38E+03
3.98E+02	7.61E+03
4.01E+02	7.61E+03
4.04E+02	7.32E+03
4.07E+02	7.20E+03
4.10E+02	7.31E+03
4.13E+02	7.75E+03
4.15E+02	7.51E+03
4.18E+02	7.21E+03
4.21E+02	6.99E+03
4.24E+02	7.33E+03
4.27E+02	7.94E+03
4.29E+02	8.10E+03
4.32E+02	7.79E+03
4.35E+02	7.60E+03
4.38E+02	7.33E+03
4.41E+02	7.55E+03
4.43E+02	7.58E+03
4.46E+02	7.34E+03
4.49E+02	6.96E+03
4.52E+02	7.02E+03
4.55E+02	7.34E+03
4.57E+02	7.76E+03
4.60E+02	7.81E+03
4.63E+02	7.53E+03
4.66E+02	7.57E+03
4.69E+02	7.79E+03
4.71E+02	7.34E+03
4.74E+02	7.25E+03
4.77E+02	7.38E+03
4.80E+02	7.50E+03
4.82E+02	7.65E+03
4.85E+02	7.88E+03
4.88E+02	8.01E+03
4.91E+02	7.90E+03
4.94E+02	7.62E+03
4.96E+02	7.55E+03
4.99E+02	7.63E+03
5.02E+02	7.76E+03
5.05E+02	7.68E+03
5.08E+02	7.64E+03
5.10E+02	7.82E+03
5.13E+02	8.09E+03
5.16E+02	8.40E+03
5.19E+02	8.18E+03
5.21E+02	7.62E+03
5.24E+02	7.55E+03
5.27E+02	7.89E+03
5.30E+02	8.06E+03
5.32E+02	7.91E+03
5.35E+02	7.82E+03
5.38E+02	8.15E+03
5.41E+02	8.18E+03
5.44E+02	7.83E+03
5.46E+02	7.80E+03
5.49E+02	7.78E+03
5.52E+02	7.76E+03
5.55E+02	7.66E+03
5.57E+02	7.75E+03
5.60E+02	7.97E+03
5.63E+02	8.17E+03
5.66E+02	7.95E+03
5.68E+02	7.81E+03
5.71E+02	7.91E+03
5.74E+02	8.09E+03
5.77E+02	7.74E+03
5.79E+02	7.81E+03
5.82E+02	7.96E+03
5.85E+02	7.76E+03
5.88E+02	7.76E+03
5.90E+02	7.88E+03
5.93E+02	8.10E+03
5.96E+02	7.97E+03
5.99E+02	7.58E+03
6.01E+02	7.79E+03
6.04E+02	8.16E+03
6.07E+02	8.08E+03
6.10E+02	8.00E+03
6.12E+02	7.73E+03
6.15E+02	7.90E+03
6.18E+02	8.35E+03
6.21E+02	8.23E+03
6.23E+02	8.11E+03
6.26E+02	8.18E+03
6.29E+02	7.99E+03
6.32E+02	7.96E+03
6.34E+02	7.93E+03
6.37E+02	8.14E+03
6.40E+02	8.10E+03
6.43E+02	8.50E+03
6.45E+02	8.43E+03
6.48E+02	8.14E+03
6.51E+02	8.12E+03
6.54E+02	8.14E+03
6.56E+02	8.53E+03
6.59E+02	8.36E+03
6.62E+02	8.09E+03
6.64E+02	8.25E+03
6.67E+02	8.22E+03
6.70E+02	8.18E+03
6.73E+02	8.28E+03
6.75E+02	8.05E+03
6.78E+02	7.79E+03
6.81E+02	8.01E+03
6.84E+02	7.97E+03
6.86E+02	8.04E+03
6.89E+02	8.35E+03
6.92E+02	7.81E+03
6.94E+02	7.77E+03
6.97E+02	7.89E+03
7.00E+02	7.84E+03
7.03E+02	8.02E+03
7.05E+02	7.97E+03
7.08E+02	8.13E+03
7.11E+02	8.04E+03
7.13E+02	7.92E+03
7.16E+02	7.94E+03
7.19E+02	7.99E+03
7.22E+02	8.04E+03
7.24E+02	7.79E+03
7.27E+02	7.89E+03
7.30E+02	7.80E+03
7.32E+02	7.68E+03
7.35E+02	7.89E+03
7.38E+02	7.75E+03
7.40E+02	7.56E+03
7.43E+02	7.68E+03
7.46E+02	7.97E+03
7.49E+02	8.10E+03
7.51E+02	8.30E+03
7.54E+02	7.99E+03
7.57E+02	7.94E+03
7.59E+02	7.88E+03
7.62E+02	7.81E+03
7.65E+02	8.24E+03
7.67E+02	8.08E+03
7.70E+02	8.12E+03
7.73E+02	8.26E+03
7.76E+02	8.19E+03
7.78E+02	8.25E+03
7.81E+02	8.19E+03
7.84E+02	7.89E+03
7.86E+02	7.81E+03
7.89E+02	7.98E+03
7.92E+02	8.32E+03
7.94E+02	8.10E+03
7.97E+02	8.04E+03
8.00E+02	8.33E+03
8.02E+02	8.09E+03
8.05E+02	8.02E+03
8.08E+02	8.17E+03
8.10E+02	8.17E+03
8.13E+02	8.08E+03
8.16E+02	8.21E+03
8.19E+02	8.41E+03
8.21E+02	8.35E+03
8.24E+02	8.23E+03
8.27E+02	8.23E+03
8.29E+02	8.36E+03
8.32E+02	8.69E+03
8.35E+02	8.72E+03
8.37E+02	8.12E+03
8.40E+02	7.83E+03
8.43E+02	8.07E+03
8.45E+02	8.25E+03
8.48E+02	8.26E+03
8.51E+02	7.90E+03
8.53E+02	7.88E+03
8.56E+02	8.07E+03
8.59E+02	8.49E+03
8.61E+02	8.41E+03
8.64E+02	8.65E+03
8.67E+02	8.72E+03
8.69E+02	8.43E+03
8.72E+02	8.36E+03
8.75E+02	8.39E+03
8.77E+02	8.67E+03
8.80E+02	8.56E+03
8.83E+02	8.47E+03
8.85E+02	8.60E+03
8.88E+02	8.82E+03
8.91E+02	8.79E+03
8.93E+02	8.76E+03
8.96E+02	8.57E+03
8.98E+02	8.52E+03
9.01E+02	8.46E+03
9.04E+02	8.59E+03
9.06E+02	8.98E+03
9.09E+02	9.41E+03
9.12E+02	9.25E+03
9.14E+02	9.10E+03
9.17E+02	9.05E+03
9.20E+02	8.72E+03
9.22E+02	8.70E+03
9.25E+02	8.51E+03
9.28E+02	8.54E+03
9.30E+02	8.94E+03
9.33E+02	9.23E+03
9.36E+02	9.22E+03
9.38E+02	9.33E+03
9.41E+02	9.10E+03
9.43E+02	8.73E+03
9.46E+02	8.86E+03
9.49E+02	8.95E+03
9.51E+02	9.00E+03
9.54E+02	9.30E+03
9.57E+02	9.26E+03
9.59E+02	9.44E+03
9.62E+02	9.46E+03
9.65E+02	9.46E+03
9.67E+02	9.38E+03
9.70E+02	9.11E+03
9.72E+02	9.22E+03
9.75E+02	9.31E+03
9.78E+02	9.48E+03
9.80E+02	9.46E+03
9.83E+02	9.57E+03
9.86E+02	9.91E+03
9.88E+02	9.70E+03
9.91E+02	9.66E+03
9.93E+02	9.69E+03
9.96E+02	9.73E+03
9.99E+02	9.88E+03
1.00E+03	1.01E+04
1.00E+03	9.95E+03
1.01E+03	9.81E+03
1.01E+03	1.01E+04
1.01E+03	9.88E+03
1.01E+03	9.83E+03
1.02E+03	1.01E+04
1.02E+03	1.03E+04
1.02E+03	9.97E+03
1.02E+03	9.89E+03
1.03E+03	1.01E+04
1.03E+03	1.01E+04
1.03E+03	1.03E+04
1.04E+03	1.02E+04
1.04E+03	1.03E+04
1.04E+03	1.03E+04
1.04E+03	1.05E+04
1.05E+03	1.05E+04
1.05E+03	1.06E+04
1.05E+03	1.06E+04
1.05E+03	1.04E+04
1.06E+03	1.04E+04
1.06E+03	1.07E+04
1.06E+03	1.08E+04
1.06E+03	1.10E+04
1.07E+03	1.08E+04
1.07E+03	1.08E+04
1.07E+03	1.10E+04
1.07E+03	1.11E+04
1.08E+03	1.11E+04
1.08E+03	1.11E+04
1.08E+03	1.11E+04
1.08E+03	1.10E+04
1.09E+03	1.10E+04
1.09E+03	1.13E+04
1.09E+03	1.15E+04
1.10E+03	1.10E+04
1.10E+03	1.13E+04
1.10E+03	1.14E+04
1.10E+03	1.14E+04
1.11E+03	1.12E+04
1.11E+03	1.13E+04
1.11E+03	1.15E+04
1.11E+03	1.14E+04
1.12E+03	1.09E+04
1.12E+03	1.10E+04
1.12E+03	1.14E+04
1.12E+03	1.11E+04
1.13E+03	1.12E+04
1.13E+03	1.16E+04
1.13E+03	1.14E+04
1.13E+03	1.15E+04
1.14E+03	1.15E+04
1.14E+03	1.13E+04
1.14E+03	1.16E+04
1.14E+03	1.16E+04
1.15E+03	1.14E+04
1.15E+03	1.16E+04
1.15E+03	1.16E+04
1.15E+03	1.17E+04
1.16E+03	1.18E+04
1.16E+03	1.16E+04
1.16E+03	1.17E+04
1.16E+03	1.15E+04
1.17E+03	1.16E+04
1.17E+03	1.22E+04
1.17E+03	1.22E+04
1.18E+03	1.20E+04
1.18E+03	1.18E+04
1.18E+03	1.23E+04
1.18E+03	1.26E+04
1.19E+03	1.24E+04
1.19E+03	1.25E+04
1.19E+03	1.26E+04
1.19E+03	1.23E+04
1.20E+03	1.20E+04
1.20E+03	1.21E+04
1.20E+03	1.28E+04
1.20E+03	1.32E+04
1.21E+03	1.27E+04
1.21E+03	1.25E+04
1.21E+03	1.24E+04
1.21E+03	1.25E+04
1.22E+03	1.32E+04
1.22E+03	1.34E+04
1.22E+03	1.27E+04
1.22E+03	1.27E+04
1.23E+03	1.28E+04
1.23E+03	1.25E+04
1.23E+03	1.24E+04
1.23E+03	1.24E+04
1.24E+03	1.27E+04
1.24E+03	1.25E+04
1.24E+03	1.27E+04
1.24E+03	1.27E+04
1.25E+03	1.28E+04
1.25E+03	1.23E+04
1.25E+03	1.25E+04
1.25E+03	1.28E+04
1.26E+03	1.33E+04
1.26E+03	1.36E+04
1.26E+03	1.33E+04
1.26E+03	1.30E+04
1.27E+03	1.28E+04
1.27E+03	1.28E+04
1.27E+03	1.30E+04
1.27E+03	1.29E+04
1.28E+03	1.32E+04
1.28E+03	1.34E+04
1.28E+03	1.36E+04
1.28E+03	1.36E+04
1.29E+03	1.39E+04
1.29E+03	1.40E+04
1.29E+03	1.45E+04
1.29E+03	1.47E+04
1.30E+03	1.45E+04
1.30E+03	1.42E+04
1.30E+03	1.38E+04
1.31E+03	1.36E+04
1.31E+03	1.38E+04
1.31E+03	1.37E+04
1.31E+03	1.39E+04
1.32E+03	1.45E+04
1.32E+03	1.51E+04
1.32E+03	1.48E+04
1.32E+03	1.42E+04
1.33E+03	1.39E+04
1.33E+03	1.39E+04
1.33E+03	1.41E+04
1.33E+03	1.44E+04
1.34E+03	1.45E+04
1.34E+03	1.47E+04
1.34E+03	1.42E+04
1.34E+03	1.41E+04
1.35E+03	1.43E+04
1.35E+03	1.39E+04
1.35E+03	1.37E+04
1.35E+03	1.38E+04
1.36E+03	1.39E+04
1.36E+03	1.42E+04
1.36E+03	1.42E+04
1.36E+03	1.42E+04
1.37E+03	1.39E+04
1.37E+03	1.40E+04
1.37E+03	1.39E+04
1.37E+03	1.38E+04
1.38E+03	1.40E+04
1.38E+03	1.38E+04
1.38E+03	1.37E+04
1.38E+03	1.36E+04
1.39E+03	1.35E+04
1.39E+03	1.34E+04
1.39E+03	1.36E+04
1.39E+03	1.39E+04
1.40E+03	1.40E+04
1.40E+03	1.45E+04
1.40E+03	1.43E+04
1.40E+03	1.42E+04
1.41E+03	1.38E+04
1.41E+03	1.37E+04
1.41E+03	1.39E+04
1.41E+03	1.38E+04
1.42E+03	1.39E+04
1.42E+03	1.41E+04
1.42E+03	1.45E+04
1.42E+03	1.43E+04
1.43E+03	1.37E+04
1.43E+03	1.32E+04
1.43E+03	1.32E+04
1.43E+03	1.34E+04
1.44E+03	1.34E+04
1.44E+03	1.36E+04
1.44E+03	1.35E+04
1.44E+03	1.39E+04
1.45E+03	1.37E+04
1.45E+03	1.37E+04
1.45E+03	1.34E+04
1.45E+03	1.33E+04
1.46E+03	1.37E+04
1.46E+03	1.39E+04
1.46E+03	1.39E+04
1.46E+03	1.38E+04
1.47E+03	1.39E+04
1.47E+03	1.39E+04
1.47E+03	1.36E+04
1.47E+03	1.33E+04
1.48E+03	1.35E+04
1.48E+03	1.39E+04
1.48E+03	1.38E+04
1.48E+03	1.37E+04
1.48E+03	1.37E+04
1.49E+03	1.36E+04
1.49E+03	1.32E+04
1.49E+03	1.36E+04
1.49E+03	1.41E+04
1.50E+03	1.38E+04
1.50E+03	1.37E+04
1.50E+03	1.38E+04
1.50E+03	1.39E+04
1.51E+03	1.41E+04
1.51E+03	1.40E+04
1.51E+03	1.42E+04
1.51E+03	1.44E+04
1.52E+03	1.43E+04
1.52E+03	1.46E+04
1.52E+03	1.49E+04
1.52E+03	1.44E+04
1.53E+03	1.40E+04
1.53E+03	1.44E+04
1.53E+03	1.46E+04
1.53E+03	1.45E+04
1.54E+03	1.46E+04
1.54E+03	1.46E+04
1.54E+03	1.45E+04
1.54E+03	1.48E+04
1.55E+03	1.51E+04
1.55E+03	1.54E+04
1.55E+03	1.55E+04
1.55E+03	1.56E+04
1.56E+03	1.58E+04
1.56E+03	1.57E+04
1.56E+03	1.53E+04
1.56E+03	1.56E+04
1.57E+03	1.57E+04
1.57E+03	1.60E+04
1.57E+03	1.64E+04
1.57E+03	1.61E+04
1.58E+03	1.54E+04
1.58E+03	1.52E+04
1.58E+03	1.51E+04
1.58E+03	1.47E+04
1.59E+03	1.48E+04
1.59E+03	1.50E+04
1.59E+03	1.52E+04
1.59E+03	1.45E+04
1.60E+03	1.45E+04
1.60E+03	1.46E+04
1.60E+03	1.45E+04
1.60E+03	1.43E+04
1.61E+03	1.38E+04
1.61E+03	1.35E+04
1.61E+03	1.36E+04
1.61E+03	1.35E+04
1.61E+03	1.30E+04
1.62E+03	1.30E+04
1.62E+03	1.30E+04
1.62E+03	1.25E+04
1.62E+03	1.22E+04
1.63E+03	1.21E+04
1.63E+03	1.22E+04
1.63E+03	1.22E+04
1.63E+03	1.19E+04
1.64E+03	1.18E+04
1.64E+03	1.16E+04
1.64E+03	1.15E+04
1.64E+03	1.15E+04
1.65E+03	1.13E+04
1.65E+03	1.12E+04
1.65E+03	1.13E+04
1.65E+03	1.09E+04
1.66E+03	1.07E+04
1.66E+03	1.05E+04
1.66E+03	1.05E+04
1.66E+03	1.04E+04
1.67E+03	1.07E+04
1.67E+03	1.07E+04
1.67E+03	1.05E+04
1.67E+03	1.05E+04
1.68E+03	1.07E+04
1.68E+03	1.08E+04
1.68E+03	1.06E+04
1.68E+03	1.03E+04
1.69E+03	1.02E+04
1.69E+03	1.03E+04
1.69E+03	1.01E+04
1.69E+03	1.04E+04
1.69E+03	1.03E+04
1.70E+03	1.03E+04
1.70E+03	1.02E+04
1.70E+03	9.80E+03
1.70E+03	9.82E+03
1.71E+03	9.93E+03
1.71E+03	1.03E+04
1.71E+03	1.03E+04
1.71E+03	1.04E+04
1.72E+03	1.02E+04
1.72E+03	9.97E+03
1.72E+03	1.00E+04
1.72E+03	1.00E+04
1.73E+03	9.87E+03
1.73E+03	1.00E+04
1.73E+03	9.72E+03
1.73E+03	9.51E+03
1.74E+03	9.48E+03
1.74E+03	9.79E+03
1.74E+03	1.01E+04
1.74E+03	1.03E+04
1.75E+03	1.02E+04
1.75E+03	9.89E+03
1.75E+03	9.36E+03
1.75E+03	9.37E+03
1.75E+03	9.54E+03
1.76E+03	1.01E+04
1.76E+03	1.06E+04
1.76E+03	1.07E+04
1.76E+03	1.03E+04
1.77E+03	9.84E+03
1.77E+03	9.86E+03
1.77E+03	9.90E+03
1.77E+03	1.02E+04
1.78E+03	1.00E+04
1.78E+03	9.96E+03
1.78E+03	1.04E+04
1.78E+03	1.01E+04
1.79E+03	1.03E+04
1.79E+03	1.01E+04
1.79E+03	1.01E+04
1.79E+03	1.01E+04
1.80E+03	1.01E+04
1.80E+03	1.03E+04
1.80E+03	1.02E+04
1.80E+03	1.01E+04
1.80E+03	1.03E+04
1.81E+03	1.00E+04
1.81E+03	9.88E+03
1.81E+03	9.80E+03
1.81E+03	9.86E+03
1.82E+03	9.80E+03
1.82E+03	9.89E+03
1.82E+03	1.01E+04
1.82E+03	1.04E+04
1.83E+03	1.02E+04
1.83E+03	1.02E+04
1.83E+03	1.01E+04
1.83E+03	9.67E+03
1.84E+03	9.52E+03
1.84E+03	9.67E+03
1.84E+03	9.95E+03
1.84E+03	1.02E+04
1.84E+03	1.03E+04
1.85E+03	1.03E+04
1.85E+03	9.85E+03
1.85E+03	9.75E+03
1.85E+03	1.04E+04
1.86E+03	1.09E+04
1.86E+03	1.05E+04
1.86E+03	1.03E+04
1.86E+03	1.03E+04
1.87E+03	1.04E+04
1.87E+03	1.02E+04
1.87E+03	9.88E+03
1.87E+03	1.00E+04
1.88E+03	1.01E+04
1.88E+03	1.00E+04
1.88E+03	9.77E+03
1.88E+03	9.82E+03
1.89E+03	1.02E+04
1.89E+03	1.05E+04
1.89E+03	1.06E+04
1.89E+03	1.06E+04
1.89E+03	1.03E+04
1.90E+03	1.03E+04
1.90E+03	1.04E+04
1.90E+03	1.05E+04
1.90E+03	1.06E+04
1.91E+03	1.05E+04
1.91E+03	1.05E+04
1.91E+03	1.05E+04
1.91E+03	1.08E+04
1.92E+03	1.08E+04
1.92E+03	1.06E+04
1.92E+03	1.05E+04
1.92E+03	1.04E+04
1.92E+03	1.05E+04
1.93E+03	1.03E+04
1.93E+03	1.01E+04
1.93E+03	1.03E+04
1.93E+03	1.05E+04
1.94E+03	1.06E+04
1.94E+03	1.06E+04
1.94E+03	1.03E+04
1.94E+03	1.05E+04
1.95E+03	1.03E+04
1.95E+03	1.06E+04
1.95E+03	1.06E+04
1.95E+03	1.07E+04
1.96E+03	1.08E+04
1.96E+03	1.05E+04
1.96E+03	1.06E+04
1.96E+03	1.06E+04
1.96E+03	1.06E+04
1.97E+03	1.04E+04
1.97E+03	1.07E+04
1.97E+03	1.08E+04
1.97E+03	1.09E+04
1.98E+03	1.07E+04
1.98E+03	1.06E+04
1.98E+03	1.09E+04
1.98E+03	1.05E+04
1.99E+03	1.07E+04
1.99E+03	1.10E+04
1.99E+03	1.08E+04
1.99E+03	1.08E+04
1.99E+03	1.09E+04
2.00E+03	1.10E+04
2.00E+03	1.09E+04
2.00E+03	1.11E+04
2.00E+03	1.09E+04
2.01E+03	1.08E+04
2.01E+03	1.12E+04
2.01E+03	1.13E+04
2.01E+03	1.08E+04
2.02E+03	1.08E+04
2.02E+03	1.06E+04
2.02E+03	1.05E+04
2.02E+03	1.04E+04
2.02E+03	1.06E+04
2.03E+03	1.07E+04
2.03E+03	1.06E+04
2.03E+03	1.08E+04
2.03E+03	1.07E+04
2.04E+03	1.07E+04
2.04E+03	1.07E+04
2.04E+03	1.09E+04
2.04E+03	1.11E+04
2.05E+03	1.10E+04
2.05E+03	1.10E+04
2.05E+03	1.12E+04
2.05E+03	1.10E+04
2.05E+03	1.09E+04
2.06E+03	1.08E+04
2.06E+03	1.11E+04
2.06E+03	1.13E+04
2.06E+03	1.13E+04
2.07E+03	1.12E+04
2.07E+03	1.10E+04
2.07E+03	1.08E+04
2.07E+03	1.11E+04
2.08E+03	1.11E+04
2.08E+03	1.11E+04
2.08E+03	1.10E+04
2.08E+03	1.10E+04
2.08E+03	1.11E+04
2.09E+03	1.16E+04
2.09E+03	1.18E+04
2.09E+03	1.14E+04
2.09E+03	1.14E+04
2.10E+03	1.13E+04
2.10E+03	1.13E+04
2.10E+03	1.13E+04
2.10E+03	1.13E+04
2.11E+03	1.14E+04
2.11E+03	1.14E+04
2.11E+03	1.12E+04
2.11E+03	1.14E+04
2.11E+03	1.16E+04
2.12E+03	1.16E+04
2.12E+03	1.14E+04
2.12E+03	1.16E+04
2.12E+03	1.17E+04
2.13E+03	1.17E+04
2.13E+03	1.16E+04
2.13E+03	1.14E+04
2.13E+03	1.15E+04
2.13E+03	1.15E+04
2.14E+03	1.14E+04
2.14E+03	1.12E+04
2.14E+03	1.14E+04
2.14E+03	1.17E+04
2.15E+03	1.15E+04
2.15E+03	1.11E+04
2.15E+03	1.13E+04
2.15E+03	1.12E+04
2.16E+03	1.10E+04
2.16E+03	1.09E+04
2.16E+03	1.10E+04
2.16E+03	1.11E+04
2.16E+03	1.13E+04
2.17E+03	1.16E+04
2.17E+03	1.20E+04
2.17E+03	1.24E+04
2.17E+03	1.21E+04
2.18E+03	1.18E+04
2.18E+03	1.17E+04
2.18E+03	1.16E+04
2.18E+03	1.17E+04
2.18E+03	1.18E+04
2.19E+03	1.17E+04
2.19E+03	1.11E+04
2.19E+03	1.10E+04
2.19E+03	1.08E+04
2.20E+03	1.11E+04
2.20E+03	1.14E+04
2.20E+03	1.21E+04
2.20E+03	1.21E+04
2.20E+03	1.18E+04
2.21E+03	1.19E+04
2.21E+03	1.18E+04
2.21E+03	1.21E+04
2.21E+03	1.21E+04
2.22E+03	1.19E+04
2.22E+03	1.21E+04
2.22E+03	1.16E+04
2.22E+03	1.15E+04
2.23E+03	1.19E+04
2.23E+03	1.19E+04
2.23E+03	1.21E+04
2.23E+03	1.24E+04
2.23E+03	1.27E+04
2.24E+03	1.22E+04
2.24E+03	1.21E+04
2.24E+03	1.20E+04
2.24E+03	1.23E+04
2.25E+03	1.21E+04
2.25E+03	1.19E+04
2.25E+03	1.17E+04
2.25E+03	1.19E+04
2.25E+03	1.20E+04
2.26E+03	1.23E+04
2.26E+03	1.23E+04
2.26E+03	1.25E+04
2.26E+03	1.21E+04
2.27E+03	1.21E+04
2.27E+03	1.21E+04
2.27E+03	1.21E+04
2.27E+03	1.21E+04
2.27E+03	1.19E+04
2.28E+03	1.20E+04
2.28E+03	1.21E+04
2.28E+03	1.20E+04
2.28E+03	1.20E+04
2.29E+03	1.20E+04
2.29E+03	1.22E+04
2.29E+03	1.21E+04
2.29E+03	1.22E+04
2.29E+03	1.21E+04
2.30E+03	1.21E+04
2.30E+03	1.25E+04
2.30E+03	1.26E+04
2.30E+03	1.23E+04
2.31E+03	1.23E+04
2.31E+03	1.24E+04
2.31E+03	1.24E+04
2.31E+03	1.25E+04
2.31E+03	1.24E+04
2.32E+03	1.23E+04
2.32E+03	1.26E+04
2.32E+03	1.26E+04
2.32E+03	1.23E+04
2.33E+03	1.24E+04
2.33E+03	1.24E+04
2.33E+03	1.24E+04
2.33E+03	1.27E+04
2.33E+03	1.25E+04
2.34E+03	1.24E+04
2.34E+03	1.26E+04
2.34E+03	1.27E+04
2.34E+03	1.28E+04
2.35E+03	1.30E+04
2.35E+03	1.28E+04
2.35E+03	1.26E+04
2.35E+03	1.28E+04
2.35E+03	1.29E+04
2.36E+03	1.32E+04
2.36E+03	1.27E+04
2.36E+03	1.29E+04
2.36E+03	1.27E+04
2.37E+03	1.29E+04
2.37E+03	1.32E+04
2.37E+03	1.36E+04
2.37E+03	1.34E+04
2.37E+03	1.34E+04
2.38E+03	1.31E+04
2.38E+03	1.31E+04
2.38E+03	1.33E+04
2.38E+03	1.32E+04
2.39E+03	1.37E+04
2.39E+03	1.38E+04
2.39E+03	1.36E+04
2.39E+03	1.33E+04
2.39E+03	1.34E+04
2.40E+03	1.32E+04
2.40E+03	1.28E+04
2.40E+03	1.31E+04
2.40E+03	1.31E+04
2.41E+03	1.30E+04
2.41E+03	1.32E+04
2.41E+03	1.33E+04
2.41E+03	1.32E+04
2.41E+03	1.34E+04
2.42E+03	1.33E+04
2.42E+03	1.33E+04
2.42E+03	1.34E+04
2.42E+03	1.35E+04
2.42E+03	1.37E+04
2.43E+03	1.36E+04
2.43E+03	1.35E+04
2.43E+03	1.36E+04
2.43E+03	1.37E+04
2.44E+03	1.38E+04
2.44E+03	1.35E+04
2.44E+03	1.31E+04
2.44E+03	1.32E+04
2.44E+03	1.35E+04
2.45E+03	1.36E+04
2.45E+03	1.36E+04
2.45E+03	1.35E+04
2.45E+03	1.37E+04
2.46E+03	1.41E+04
2.46E+03	1.43E+04
2.46E+03	1.43E+04
2.46E+03	1.40E+04
2.46E+03	1.39E+04
2.47E+03	1.40E+04
2.47E+03	1.42E+04
2.47E+03	1.42E+04
2.47E+03	1.36E+04
2.48E+03	1.36E+04
2.48E+03	1.38E+04
2.48E+03	1.40E+04
2.48E+03	1.42E+04
2.48E+03	1.41E+04
2.49E+03	1.42E+04
2.49E+03	1.44E+04
2.49E+03	1.40E+04
2.49E+03	1.42E+04
2.49E+03	1.43E+04
2.50E+03	1.40E+04
2.50E+03	1.43E+04
2.50E+03	1.42E+04
2.50E+03	1.38E+04
2.51E+03	1.36E+04
2.51E+03	1.36E+04
2.51E+03	1.38E+04
2.51E+03	1.42E+04
2.51E+03	1.43E+04
2.52E+03	1.46E+04
2.52E+03	1.50E+04
2.52E+03	1.52E+04
2.52E+03	1.52E+04
2.53E+03	1.50E+04
2.53E+03	1.48E+04
2.53E+03	1.46E+04
2.53E+03	1.46E+04
2.53E+03	1.47E+04
2.54E+03	1.48E+04
2.54E+03	1.48E+04
2.54E+03	1.46E+04
2.54E+03	1.46E+04
2.54E+03	1.50E+04
2.55E+03	1.50E+04
2.55E+03	1.51E+04
2.55E+03	1.51E+04
2.55E+03	1.48E+04
2.56E+03	1.45E+04
2.56E+03	1.47E+04
2.56E+03	1.51E+04
2.56E+03	1.54E+04
2.56E+03	1.51E+04
2.57E+03	1.50E+04
2.57E+03	1.51E+04
2.57E+03	1.52E+04
2.57E+03	1.56E+04
2.57E+03	1.56E+04
2.58E+03	1.56E+04
2.58E+03	1.52E+04
2.58E+03	1.52E+04
2.58E+03	1.53E+04
2.59E+03	1.53E+04
2.59E+03	1.54E+04
2.59E+03	1.53E+04
2.59E+03	1.53E+04
2.59E+03	1.57E+04
2.60E+03	1.58E+04
2.60E+03	1.58E+04
2.60E+03	1.64E+04
2.60E+03	1.63E+04
2.60E+03	1.59E+04
2.61E+03	1.59E+04
2.61E+03	1.60E+04
2.61E+03	1.62E+04
2.61E+03	1.59E+04
2.62E+03	1.51E+04
2.62E+03	1.47E+04
2.62E+03	1.49E+04
2.62E+03	1.52E+04
2.62E+03	1.57E+04
2.63E+03	1.58E+04
2.63E+03	1.56E+04
2.63E+03	1.54E+04
2.63E+03	1.60E+04
2.63E+03	1.65E+04
2.64E+03	1.66E+04
2.64E+03	1.61E+04
2.64E+03	1.60E+04
2.64E+03	1.59E+04
2.65E+03	1.57E+04
2.65E+03	1.54E+04
2.65E+03	1.58E+04
2.65E+03	1.58E+04
2.65E+03	1.60E+04
2.66E+03	1.59E+04
2.66E+03	1.63E+04
2.66E+03	1.65E+04
2.66E+03	1.63E+04
2.66E+03	1.65E+04
2.67E+03	1.72E+04
2.67E+03	1.70E+04
2.67E+03	1.65E+04
2.67E+03	1.60E+04
2.67E+03	1.61E+04
2.68E+03	1.63E+04
2.68E+03	1.65E+04
2.68E+03	1.64E+04
2.68E+03	1.63E+04
2.69E+03	1.66E+04
2.69E+03	1.68E+04
2.69E+03	1.68E+04
2.69E+03	1.71E+04
2.69E+03	1.74E+04
2.70E+03	1.73E+04
2.70E+03	1.65E+04
2.70E+03	1.62E+04
2.70E+03	1.61E+04
2.70E+03	1.58E+04
2.71E+03	1.59E+04
2.71E+03	1.64E+04
2.71E+03	1.60E+04
2.71E+03	1.61E+04
2.71E+03	1.63E+04
2.72E+03	1.60E+04
2.72E+03	1.64E+04
2.72E+03	1.69E+04
2.72E+03	1.65E+04
2.73E+03	1.67E+04
2.73E+03	1.71E+04
2.73E+03	1.66E+04
2.73E+03	1.64E+04
2.73E+03	1.64E+04
2.74E+03	1.66E+04
2.74E+03	1.72E+04
2.74E+03	1.73E+04
2.74E+03	1.74E+04
2.74E+03	1.73E+04
2.75E+03	1.75E+04
2.75E+03	1.72E+04
2.75E+03	1.77E+04
2.75E+03	1.77E+04
2.75E+03	1.76E+04
2.76E+03	1.75E+04
2.76E+03	1.68E+04
2.76E+03	1.62E+04
2.76E+03	1.61E+04
2.77E+03	1.63E+04
2.77E+03	1.65E+04
2.77E+03	1.70E+04
2.77E+03	1.72E+04
2.77E+03	1.68E+04
2.78E+03	1.69E+04
2.78E+03	1.68E+04
2.78E+03	1.74E+04
2.78E+03	1.74E+04
2.78E+03	1.70E+04
2.79E+03	1.67E+04
2.79E+03	1.65E+04
2.79E+03	1.69E+04
2.79E+03	1.74E+04
2.79E+03	1.77E+04
2.80E+03	1.77E+04
2.80E+03	1.72E+04
2.80E+03	1.66E+04
2.80E+03	1.68E+04
2.80E+03	1.70E+04
2.81E+03	1.74E+04
2.81E+03	1.72E+04
2.81E+03	1.72E+04
2.81E+03	1.71E+04
2.82E+03	1.69E+04
2.82E+03	1.69E+04
2.82E+03	1.67E+04
2.82E+03	1.72E+04
2.82E+03	1.70E+04
2.83E+03	1.70E+04
2.83E+03	1.70E+04
2.83E+03	1.71E+04
2.83E+03	1.70E+04
2.83E+03	1.70E+04
2.84E+03	1.71E+04
2.84E+03	1.72E+04
2.84E+03	1.69E+04
2.84E+03	1.66E+04
2.84E+03	1.65E+04
2.85E+03	1.64E+04
2.85E+03	1.65E+04
2.85E+03	1.67E+04
2.85E+03	1.66E+04
2.85E+03	1.67E+04
2.86E+03	1.67E+04
2.86E+03	1.66E+04
2.86E+03	1.71E+04
2.86E+03	1.69E+04
2.87E+03	1.62E+04
2.87E+03	1.64E+04
2.87E+03	1.65E+04
2.87E+03	1.63E+04
2.87E+03	1.64E+04
2.88E+03	1.65E+04
2.88E+03	1.65E+04
2.88E+03	1.65E+04
2.88E+03	1.69E+04
2.88E+03	1.67E+04
2.89E+03	1.68E+04
2.89E+03	1.67E+04
2.89E+03	1.64E+04
2.89E+03	1.68E+04
2.89E+03	1.66E+04
2.90E+03	1.65E+04
2.90E+03	1.63E+04
2.90E+03	1.66E+04
2.90E+03	1.68E+04
2.90E+03	1.67E+04
2.91E+03	1.62E+04
2.91E+03	1.52E+04
2.91E+03	1.50E+04
2.91E+03	1.54E+04
2.91E+03	1.62E+04
2.92E+03	1.70E+04
2.92E+03	1.70E+04
2.92E+03	1.73E+04
2.92E+03	1.72E+04
2.92E+03	1.69E+04
2.93E+03	1.67E+04
2.93E+03	1.71E+04
2.93E+03	1.70E+04
2.93E+03	1.71E+04
2.93E+03	1.73E+04
2.94E+03	1.73E+04
2.94E+03	1.70E+04
2.94E+03	1.68E+04
2.94E+03	1.69E+04
2.95E+03	1.65E+04
2.95E+03	1.61E+04
2.95E+03	1.60E+04
2.95E+03	1.65E+04
2.95E+03	1.65E+04
2.96E+03	1.66E+04
2.96E+03	1.67E+04
2.96E+03	1.71E+04
2.96E+03	1.74E+04
2.96E+03	1.72E+04
2.97E+03	1.70E+04
2.97E+03	1.67E+04
2.97E+03	1.66E+04
2.97E+03	1.63E+04
2.97E+03	1.59E+04
2.98E+03	1.56E+04
2.98E+03	1.60E+04
2.98E+03	1.60E+04
2.98E+03	1.60E+04
2.98E+03	1.67E+04
2.99E+03	1.73E+04
2.99E+03	1.78E+04
2.99E+03	1.75E+04
2.99E+03	1.68E+04
2.99E+03	1.64E+04
3.00E+03	1.59E+04
3.00E+03	1.65E+04
3.00E+03	1.70E+04
3.00E+03	1.66E+04
3.00E+03	1.68E+04
3.01E+03	1.74E+04
3.01E+03	1.73E+04
3.01E+03	1.66E+04
3.01E+03	1.66E+04
3.01E+03	1.69E+04
3.02E+03	1.65E+04
3.02E+03	1.63E+04
3.02E+03	1.66E+04
3.02E+03	1.71E+04
3.02E+03	1.76E+04
3.03E+03	1.77E+04
3.03E+03	1.70E+04
3.03E+03	1.64E+04
3.03E+03	1.61E+04
3.03E+03	1.63E+04
3.04E+03	1.63E+04
3.04E+03	1.65E+04
3.04E+03	1.62E+04
3.04E+03	1.64E+04
3.04E+03	1.59E+04
3.05E+03	1.56E+04
3.05E+03	1.59E+04
3.05E+03	1.65E+04
3.05E+03	1.71E+04
3.05E+03	1.72E+04
3.06E+03	1.71E+04
3.06E+03	1.68E+04
3.06E+03	1.59E+04
3.06E+03	1.57E+04
3.06E+03	1.60E+04
3.07E+03	1.62E+04
3.07E+03	1.70E+04
3.07E+03	1.69E+04
3.07E+03	1.68E+04
3.07E+03	1.62E+04
3.08E+03	1.60E+04
3.08E+03	1.56E+04
3.08E+03	1.54E+04
3.08E+03	1.60E+04
3.08E+03	1.63E+04
3.09E+03	1.64E+04
3.09E+03	1.64E+04
3.09E+03	1.62E+04
3.09E+03	1.60E+04
3.09E+03	1.59E+04
3.10E+03	1.56E+04
3.10E+03	1.51E+04
3.10E+03	1.52E+04
3.10E+03	1.57E+04
3.10E+03	1.63E+04
3.11E+03	1.61E+04
3.11E+03	1.59E+04
3.11E+03	1.56E+04
3.11E+03	1.58E+04
3.11E+03	1.61E+04
3.12E+03	1.61E+04
3.12E+03	1.60E+04
3.12E+03	1.60E+04
3.12E+03	1.59E+04
3.12E+03	1.58E+04
3.13E+03	1.60E+04
3.13E+03	1.60E+04
3.13E+03	1.62E+04
3.13E+03	1.62E+04
3.13E+03	1.61E+04
3.14E+03	1.62E+04
3.14E+03	1.62E+04
3.14E+03	1.63E+04
3.14E+03	1.62E+04
3.14E+03	1.64E+04
3.15E+03	1.61E+04
3.15E+03	1.51E+04
3.15E+03	1.48E+04
3.15E+03	1.52E+04
3.15E+03	1.59E+04
3.16E+03	1.64E+04
3.16E+03	1.60E+04
3.16E+03	1.54E+04
3.16E+03	1.52E+04
3.16E+03	1.62E+04
3.17E+03	1.65E+04
3.17E+03	1.67E+04
3.17E+03	1.65E+04
3.17E+03	1.61E+04
3.17E+03	1.53E+04
3.18E+03	1.51E+04
3.18E+03	1.53E+04
3.18E+03	1.57E+04
3.18E+03	1.58E+04
3.18E+03	1.58E+04
3.19E+03	1.54E+04
3.19E+03	1.50E+04
3.19E+03	1.51E+04
3.19E+03	1.50E+04
3.19E+03	1.57E+04
3.20E+03	1.62E+04
3.20E+03	1.65E+04
3.20E+03	1.63E+04
3.20E+03	1.57E+04
3.20E+03	1.52E+04
3.21E+03	1.49E+04
3.21E+03	1.50E+04
3.21E+03	1.51E+04
3.21E+03	1.50E+04
3.21E+03	1.51E+04
3.22E+03	1.55E+04
3.22E+03	1.55E+04
3.22E+03	1.57E+04
3.22E+03	1.57E+04
3.22E+03	1.60E+04
3.23E+03	1.58E+04
3.23E+03	1.58E+04
3.23E+03	1.57E+04
3.23E+03	1.56E+04
3.23E+03	1.56E+04
3.23E+03	1.56E+04
3.24E+03	1.54E+04
3.24E+03	1.58E+04
3.24E+03	1.61E+04
3.24E+03	1.60E+04
3.24E+03	1.62E+04
3.25E+03	1.58E+04
3.25E+03	1.62E+04
3.25E+03	1.61E+04
3.25E+03	1.61E+04
3.25E+03	1.55E+04
3.26E+03	1.54E+04
3.26E+03	1.53E+04
3.26E+03	1.51E+04
3.26E+03	1.51E+04
3.26E+03	1.53E+04
3.27E+03	1.52E+04
3.27E+03	1.53E+04
3.27E+03	1.52E+04
3.27E+03	1.54E+04
3.27E+03	1.56E+04
3.28E+03	1.56E+04
3.28E+03	1.53E+04
3.28E+03	1.52E+04
3.28E+03	1.54E+04
3.28E+03	1.51E+04
3.29E+03	1.51E+04
3.29E+03	1.58E+04
3.29E+03	1.56E+04
3.29E+03	1.56E+04
3.29E+03	1.55E+04
3.30E+03	1.62E+04
3.30E+03	1.60E+04
3.30E+03	1.56E+04
3.30E+03	1.56E+04
3.30E+03	1.57E+04
3.31E+03	1.55E+04
3.31E+03	1.52E+04
3.31E+03	1.48E+04
3.31E+03	1.47E+04
3.31E+03	1.54E+04
3.31E+03	1.58E+04
3.32E+03	1.61E+04
3.32E+03	1.57E+04
3.32E+03	1.52E+04
3.32E+03	1.52E+04
3.32E+03	1.52E+04
3.33E+03	1.54E+04
3.33E+03	1.56E+04
3.33E+03	1.54E+04
3.33E+03	1.56E+04
3.33E+03	1.53E+04
3.34E+03	1.51E+04
3.34E+03	1.56E+04
3.34E+03	1.56E+04
3.34E+03	1.54E+04
3.34E+03	1.54E+04
3.35E+03	1.57E+04
3.35E+03	1.54E+04
3.35E+03	1.54E+04
3.35E+03	1.59E+04
3.35E+03	1.61E+04
3.36E+03	1.64E+04
3.36E+03	1.57E+04
3.36E+03	1.57E+04
3.36E+03	1.53E+04
3.36E+03	1.57E+04
3.36E+03	1.55E+04
3.37E+03	1.53E+04
3.37E+03	1.58E+04
3.37E+03	1.59E+04
3.37E+03	1.55E+04
3.37E+03	1.59E+04
3.38E+03	1.57E+04
3.38E+03	1.56E+04
3.38E+03	1.55E+04
3.38E+03	1.55E+04
3.38E+03	1.62E+04
3.39E+03	1.55E+04
3.39E+03	1.59E+04
3.39E+03	1.60E+04
3.39E+03	1.63E+04
3.39E+03	1.60E+04
3.40E+03	1.60E+04
3.40E+03	1.59E+04
3.40E+03	1.61E+04
3.40E+03	1.57E+04
3.40E+03	1.55E+04
3.41E+03	1.53E+04
3.41E+03	1.58E+04
3.41E+03	1.59E+04
3.41E+03	1.53E+04
3.41E+03	1.60E+04
3.41E+03	1.59E+04
3.42E+03	1.59E+04
3.42E+03	1.53E+04
3.42E+03	1.51E+04
3.42E+03	1.54E+04
3.42E+03	1.51E+04
3.43E+03	1.52E+04
3.43E+03	1.55E+04
3.43E+03	1.55E+04
3.43E+03	1.53E+04
3.43E+03	1.53E+04
3.44E+03	1.61E+04
3.44E+03	1.60E+04
3.44E+03	1.60E+04
3.44E+03	1.62E+04
3.44E+03	1.60E+04
3.45E+03	1.64E+04
3.45E+03	1.62E+04
3.45E+03	1.60E+04
3.45E+03	1.60E+04
3.45E+03	1.56E+04
3.45E+03	1.53E+04
3.46E+03	1.49E+04
3.46E+03	1.53E+04
3.46E+03	1.52E+04
3.46E+03	1.49E+04
3.46E+03	1.60E+04
3.47E+03	1.62E+04
3.47E+03	1.59E+04
3.47E+03	1.53E+04
3.47E+03	1.55E+04
3.47E+03	1.58E+04
3.48E+03	1.58E+04
3.48E+03	1.61E+04
3.48E+03	1.63E+04
3.48E+03	1.63E+04
3.48E+03	1.54E+04
3.48E+03	1.53E+04
3.49E+03	1.52E+04
3.49E+03	1.52E+04
3.49E+03	1.55E+04
3.49E+03	1.60E+04
3.49E+03	1.62E+04
3.50E+03	1.64E+04
3.50E+03	1.60E+04
3.50E+03	1.61E+04
3.50E+03	1.57E+04
3.50E+03	1.61E+04
3.51E+03	1.61E+04
3.51E+03	1.64E+04
3.51E+03	1.62E+04
3.51E+03	1.58E+04
3.51E+03	1.62E+04
3.52E+03	1.59E+04
3.52E+03	1.58E+04
3.52E+03	1.53E+04
3.52E+03	1.52E+04
3.52E+03	1.53E+04
3.52E+03	1.58E+04
3.53E+03	1.60E+04
3.53E+03	1.56E+04
3.53E+03	1.59E+04
3.53E+03	1.59E+04
3.53E+03	1.57E+04
3.54E+03	1.59E+04
3.54E+03	1.56E+04
3.54E+03	1.55E+04
3.54E+03	1.53E+04
3.54E+03	1.53E+04
3.55E+03	1.56E+04
3.55E+03	1.59E+04
3.55E+03	1.62E+04
3.55E+03	1.66E+04
3.55E+03	1.68E+04
3.55E+03	1.67E+04
3.56E+03	1.70E+04
3.56E+03	1.69E+04
3.56E+03	1.67E+04
3.56E+03	1.61E+04
3.56E+03	1.58E+04
3.57E+03	1.61E+04
3.57E+03	1.65E+04
3.57E+03	1.62E+04
3.57E+03	1.57E+04
3.57E+03	1.61E+04
3.58E+03	1.66E+04
3.58E+03	1.62E+04
3.58E+03	1.63E+04
3.58E+03	1.66E+04
3.58E+03	1.66E+04
3.58E+03	1.64E+04
3.59E+03	1.67E+04
3.59E+03	1.68E+04
3.59E+03	1.61E+04
3.59E+03	1.57E+04
3.59E+03	1.63E+04
3.60E+03	1.69E+04
3.60E+03	1.68E+04
3.60E+03	1.64E+04
3.60E+03	1.63E+04
3.60E+03	1.65E+04
3.60E+03	1.62E+04
3.61E+03	1.61E+04
3.61E+03	1.60E+04
3.61E+03	1.60E+04
3.61E+03	1.60E+04
3.61E+03	1.64E+04
3.62E+03	1.66E+04
3.62E+03	1.63E+04
3.62E+03	1.61E+04
3.62E+03	1.64E+04
3.62E+03	1.65E+04
3.63E+03	1.68E+04
3.63E+03	1.71E+04
3.63E+03	1.68E+04
3.63E+03	1.66E+04
3.63E+03	1.70E+04
3.63E+03	1.69E+04
3.64E+03	1.68E+04
3.64E+03	1.67E+04
3.64E+03	1.70E+04
3.64E+03	1.67E+04
3.64E+03	1.70E+04
3.65E+03	1.75E+04
3.65E+03	1.71E+04
3.65E+03	1.68E+04
3.65E+03	1.69E+04
3.65E+03	1.71E+04
3.65E+03	1.68E+04
3.66E+03	1.68E+04
3.66E+03	1.68E+04
3.66E+03	1.71E+04
3.66E+03	1.64E+04
3.66E+03	1.64E+04
3.67E+03	1.64E+04
3.67E+03	1.64E+04
3.67E+03	1.67E+04
3.67E+03	1.61E+04
3.67E+03	1.60E+04
3.67E+03	1.59E+04
3.68E+03	1.64E+04
3.68E+03	1.71E+04
3.68E+03	1.69E+04
3.68E+03	1.75E+04
3.68E+03	1.79E+04
3.69E+03	1.72E+04
3.69E+03	1.70E+04
3.69E+03	1.70E+04
3.69E+03	1.70E+04
3.69E+03	1.59E+04
3.70E+03	1.57E+04
3.70E+03	1.60E+04
3.70E+03	1.63E+04
3.70E+03	1.66E+04
3.70E+03	1.72E+04
3.70E+03	1.75E+04
3.71E+03	1.72E+04
3.71E+03	1.74E+04
3.71E+03	1.71E+04
3.71E+03	1.65E+04
3.71E+03	1.59E+04
3.72E+03	1.62E+04
3.72E+03	1.69E+04
3.72E+03	1.70E+04
3.72E+03	1.75E+04
3.72E+03	1.80E+04
3.72E+03	1.78E+04
3.73E+03	1.74E+04
3.73E+03	1.72E+04
3.73E+03	1.76E+04
3.73E+03	1.80E+04
3.73E+03	1.74E+04
3.74E+03	1.70E+04
3.74E+03	1.67E+04
3.74E+03	1.67E+04
3.74E+03	1.62E+04
3.74E+03	1.70E+04
3.74E+03	1.72E+04
3.75E+03	1.70E+04
3.75E+03	1.64E+04
3.75E+03	1.66E+04
3.75E+03	1.65E+04
3.75E+03	1.66E+04
3.76E+03	1.70E+04
3.76E+03	1.68E+04
3.76E+03	1.71E+04
3.76E+03	1.67E+04

## Sheet: 10055 2I
rel. 1/cm	CCD cts
9.47E+01	5.38E+02
9.76E+01	5.37E+02
1.00E+02	5.37E+02
1.03E+02	5.37E+02
1.06E+02	5.40E+02
1.09E+02	5.37E+02
1.12E+02	5.36E+02
1.15E+02	5.35E+02
1.18E+02	5.37E+02
1.21E+02	5.38E+02
1.24E+02	5.39E+02
1.27E+02	5.36E+02
1.30E+02	5.40E+02
1.32E+02	5.37E+02
1.35E+02	5.39E+02
1.38E+02	5.39E+02
1.41E+02	5.44E+02
1.44E+02	5.43E+02
1.47E+02	5.44E+02
1.50E+02	5.49E+02
1.53E+02	5.48E+02
1.56E+02	5.52E+02
1.59E+02	5.61E+02
1.61E+02	5.62E+02
1.64E+02	5.67E+02
1.67E+02	5.70E+02
1.70E+02	5.68E+02
1.73E+02	5.66E+02
1.76E+02	5.69E+02
1.79E+02	5.65E+02
1.82E+02	5.63E+02
1.85E+02	5.60E+02
1.87E+02	5.63E+02
1.90E+02	5.64E+02
1.93E+02	5.64E+02
1.96E+02	5.66E+02
1.99E+02	5.70E+02
2.02E+02	5.75E+02
2.05E+02	5.79E+02
2.08E+02	5.80E+02
2.10E+02	5.89E+02
2.13E+02	5.91E+02
2.16E+02	5.94E+02
2.19E+02	5.99E+02
2.22E+02	5.95E+02
2.25E+02	5.93E+02
2.28E+02	5.91E+02
2.31E+02	5.89E+02
2.33E+02	5.89E+02
2.36E+02	5.80E+02
2.39E+02	5.76E+02
2.42E+02	5.73E+02
2.45E+02	5.67E+02
2.48E+02	5.58E+02
2.51E+02	5.57E+02
2.53E+02	5.51E+02
2.56E+02	5.52E+02
2.59E+02	5.44E+02
2.62E+02	5.48E+02
2.65E+02	5.47E+02
2.68E+02	5.46E+02
2.71E+02	5.43E+02
2.73E+02	5.44E+02
2.76E+02	5.44E+02
2.79E+02	5.44E+02
2.82E+02	5.46E+02
2.85E+02	5.49E+02
2.88E+02	5.46E+02
2.91E+02	5.42E+02
2.93E+02	5.51E+02
2.96E+02	5.51E+02
2.99E+02	5.49E+02
3.02E+02	5.50E+02
3.05E+02	5.54E+02
3.08E+02	5.57E+02
3.10E+02	5.58E+02
3.13E+02	5.65E+02
3.16E+02	5.65E+02
3.19E+02	5.73E+02
3.22E+02	5.82E+02
3.25E+02	5.89E+02
3.28E+02	5.99E+02
3.30E+02	6.03E+02
3.33E+02	6.19E+02
3.36E+02	6.36E+02
3.39E+02	6.66E+02
3.42E+02	6.97E+02
3.45E+02	7.37E+02
3.47E+02	7.62E+02
3.50E+02	7.92E+02
3.53E+02	8.02E+02
3.56E+02	7.99E+02
3.59E+02	7.85E+02
3.62E+02	7.58E+02
3.64E+02	7.39E+02
3.67E+02	7.12E+02
3.70E+02	6.87E+02
3.73E+02	6.64E+02
3.76E+02	6.46E+02
3.78E+02	6.25E+02
3.81E+02	6.14E+02
3.84E+02	6.00E+02
3.87E+02	5.85E+02
3.90E+02	5.75E+02
3.93E+02	5.68E+02
3.95E+02	5.55E+02
3.98E+02	5.45E+02
4.01E+02	5.41E+02
4.04E+02	5.33E+02
4.07E+02	5.30E+02
4.09E+02	5.32E+02
4.12E+02	5.30E+02
4.15E+02	5.26E+02
4.18E+02	5.23E+02
4.21E+02	5.22E+02
4.23E+02	5.21E+02
4.26E+02	5.23E+02
4.29E+02	5.20E+02
4.32E+02	5.19E+02
4.35E+02	5.22E+02
4.37E+02	5.21E+02
4.40E+02	5.20E+02
4.43E+02	5.21E+02
4.46E+02	5.23E+02
4.49E+02	5.21E+02
4.51E+02	5.25E+02
4.54E+02	5.26E+02
4.57E+02	5.30E+02
4.60E+02	5.27E+02
4.63E+02	5.34E+02
4.65E+02	5.35E+02
4.68E+02	5.40E+02
4.71E+02	5.42E+02
4.74E+02	5.44E+02
4.77E+02	5.47E+02
4.79E+02	5.49E+02
4.82E+02	5.45E+02
4.85E+02	5.49E+02
4.88E+02	5.51E+02
4.91E+02	5.57E+02
4.93E+02	5.63E+02
4.96E+02	5.72E+02
4.99E+02	5.80E+02
5.02E+02	5.77E+02
5.04E+02	5.74E+02
5.07E+02	5.72E+02
5.10E+02	5.62E+02
5.13E+02	5.53E+02
5.16E+02	5.48E+02
5.18E+02	5.40E+02
5.21E+02	5.38E+02
5.24E+02	5.37E+02
5.27E+02	5.33E+02
5.29E+02	5.38E+02
5.32E+02	5.38E+02
5.35E+02	5.48E+02
5.38E+02	5.57E+02
5.41E+02	5.65E+02
5.43E+02	5.79E+02
5.46E+02	5.95E+02
5.49E+02	6.01E+02
5.52E+02	6.05E+02
5.54E+02	6.08E+02
5.57E+02	5.97E+02
5.60E+02	5.85E+02
5.63E+02	5.67E+02
5.65E+02	5.57E+02
5.68E+02	5.46E+02
5.71E+02	5.36E+02
5.74E+02	5.30E+02
5.76E+02	5.24E+02
5.79E+02	5.25E+02
5.82E+02	5.22E+02
5.85E+02	5.19E+02
5.87E+02	5.18E+02
5.90E+02	5.19E+02
5.93E+02	5.20E+02
5.96E+02	5.19E+02
5.98E+02	5.18E+02
6.01E+02	5.16E+02
6.04E+02	5.16E+02
6.07E+02	5.17E+02
6.09E+02	5.14E+02
6.12E+02	5.16E+02
6.15E+02	5.18E+02
6.18E+02	5.21E+02
6.20E+02	5.29E+02
6.23E+02	5.31E+02
6.26E+02	5.33E+02
6.29E+02	5.33E+02
6.31E+02	5.35E+02
6.34E+02	5.36E+02
6.37E+02	5.33E+02
6.40E+02	5.28E+02
6.42E+02	5.24E+02
6.45E+02	5.18E+02
6.48E+02	5.14E+02
6.51E+02	5.13E+02
6.53E+02	5.11E+02
6.56E+02	5.07E+02
6.59E+02	5.09E+02
6.61E+02	5.08E+02
6.64E+02	5.07E+02
6.67E+02	5.09E+02
6.70E+02	5.07E+02
6.72E+02	5.06E+02
6.75E+02	5.07E+02
6.78E+02	5.07E+02
6.81E+02	5.06E+02
6.83E+02	5.07E+02
6.86E+02	5.08E+02
6.89E+02	5.07E+02
6.91E+02	5.07E+02
6.94E+02	5.04E+02
6.97E+02	5.06E+02
7.00E+02	5.04E+02
7.02E+02	5.08E+02
7.05E+02	5.04E+02
7.08E+02	5.05E+02
7.10E+02	5.04E+02
7.13E+02	5.05E+02
7.16E+02	5.05E+02
7.19E+02	5.05E+02
7.21E+02	5.04E+02
7.24E+02	5.07E+02
7.27E+02	5.08E+02
7.29E+02	5.04E+02
7.32E+02	5.06E+02
7.35E+02	5.05E+02
7.38E+02	5.07E+02
7.40E+02	5.05E+02
7.43E+02	5.06E+02
7.46E+02	5.04E+02
7.48E+02	5.06E+02
7.51E+02	5.05E+02
7.54E+02	5.04E+02
7.57E+02	5.08E+02
7.59E+02	5.08E+02
7.62E+02	5.08E+02
7.65E+02	5.09E+02
7.67E+02	5.10E+02
7.70E+02	5.08E+02
7.73E+02	5.10E+02
7.75E+02	5.07E+02
7.78E+02	5.09E+02
7.81E+02	5.10E+02
7.83E+02	5.10E+02
7.86E+02	5.11E+02
7.89E+02	5.14E+02
7.92E+02	5.13E+02
7.94E+02	5.16E+02
7.97E+02	5.16E+02
8.00E+02	5.18E+02
8.02E+02	5.21E+02
8.05E+02	5.24E+02
8.08E+02	5.26E+02
8.10E+02	5.28E+02
8.13E+02	5.31E+02
8.16E+02	5.33E+02
8.18E+02	5.37E+02
8.21E+02	5.43E+02
8.24E+02	5.46E+02
8.26E+02	5.51E+02
8.29E+02	5.62E+02
8.32E+02	5.76E+02
8.34E+02	5.90E+02
8.37E+02	6.09E+02
8.40E+02	6.22E+02
8.42E+02	6.38E+02
8.45E+02	6.43E+02
8.48E+02	6.41E+02
8.50E+02	6.37E+02
8.53E+02	6.28E+02
8.56E+02	6.17E+02
8.58E+02	6.11E+02
8.61E+02	6.09E+02
8.64E+02	6.11E+02
8.66E+02	6.12E+02
8.69E+02	6.22E+02
8.72E+02	6.33E+02
8.74E+02	6.44E+02
8.77E+02	6.60E+02
8.80E+02	6.82E+02
8.82E+02	7.08E+02
8.85E+02	7.59E+02
8.88E+02	8.06E+02
8.90E+02	8.96E+02
8.93E+02	1.03E+03
8.96E+02	1.16E+03
8.98E+02	1.28E+03
9.01E+02	1.33E+03
9.04E+02	1.36E+03
9.06E+02	1.34E+03
9.09E+02	1.26E+03
9.12E+02	1.14E+03
9.14E+02	9.95E+02
9.17E+02	8.87E+02
9.20E+02	7.81E+02
9.22E+02	7.07E+02
9.25E+02	6.64E+02
9.28E+02	6.32E+02
9.30E+02	6.03E+02
9.33E+02	5.84E+02
9.35E+02	5.74E+02
9.38E+02	5.61E+02
9.41E+02	5.56E+02
9.43E+02	5.47E+02
9.46E+02	5.44E+02
9.49E+02	5.40E+02
9.51E+02	5.40E+02
9.54E+02	5.36E+02
9.57E+02	5.35E+02
9.59E+02	5.32E+02
9.62E+02	5.32E+02
9.65E+02	5.32E+02
9.67E+02	5.30E+02
9.70E+02	5.31E+02
9.72E+02	5.30E+02
9.75E+02	5.25E+02
9.78E+02	5.24E+02
9.80E+02	5.28E+02
9.83E+02	5.24E+02
9.86E+02	5.22E+02
9.88E+02	5.28E+02
9.91E+02	5.25E+02
9.93E+02	5.30E+02
9.96E+02	5.29E+02
9.99E+02	5.33E+02
1.00E+03	5.37E+02
1.00E+03	5.38E+02
1.01E+03	5.41E+02
1.01E+03	5.43E+02
1.01E+03	5.49E+02
1.01E+03	5.57E+02
1.02E+03	5.61E+02
1.02E+03	5.75E+02
1.02E+03	5.80E+02
1.02E+03	5.87E+02
1.03E+03	5.89E+02
1.03E+03	5.86E+02
1.03E+03	5.84E+02
1.04E+03	5.69E+02
1.04E+03	5.56E+02
1.04E+03	5.51E+02
1.04E+03	5.40E+02
1.05E+03	5.33E+02
1.05E+03	5.26E+02
1.05E+03	5.24E+02
1.05E+03	5.19E+02
1.06E+03	5.19E+02
1.06E+03	5.19E+02
1.06E+03	5.18E+02
1.06E+03	5.13E+02
1.07E+03	5.15E+02
1.07E+03	5.14E+02
1.07E+03	5.15E+02
1.07E+03	5.14E+02
1.08E+03	5.14E+02
1.08E+03	5.15E+02
1.08E+03	5.15E+02
1.08E+03	5.17E+02
1.09E+03	5.14E+02
1.09E+03	5.15E+02
1.09E+03	5.14E+02
1.10E+03	5.14E+02
1.10E+03	5.14E+02
1.10E+03	5.13E+02
1.10E+03	5.12E+02
1.11E+03	5.11E+02
1.11E+03	5.14E+02
1.11E+03	5.10E+02
1.11E+03	5.12E+02
1.12E+03	5.10E+02
1.12E+03	5.10E+02
1.12E+03	5.10E+02
1.12E+03	5.12E+02
1.13E+03	5.09E+02
1.13E+03	5.11E+02
1.13E+03	5.11E+02
1.13E+03	5.09E+02
1.14E+03	5.06E+02
1.14E+03	5.10E+02
1.14E+03	5.10E+02
1.14E+03	5.11E+02
1.15E+03	5.12E+02
1.15E+03	5.11E+02
1.15E+03	5.12E+02
1.15E+03	5.13E+02
1.16E+03	5.13E+02
1.16E+03	5.11E+02
1.16E+03	5.11E+02
1.16E+03	5.12E+02
1.17E+03	5.14E+02
1.17E+03	5.10E+02
1.17E+03	5.11E+02
1.18E+03	5.13E+02
1.18E+03	5.10E+02
1.18E+03	5.13E+02
1.18E+03	5.11E+02
1.19E+03	5.12E+02
1.19E+03	5.12E+02
1.19E+03	5.11E+02
1.19E+03	5.10E+02
1.20E+03	5.10E+02
1.20E+03	5.11E+02
1.20E+03	5.11E+02
1.20E+03	5.14E+02
1.21E+03	5.10E+02
1.21E+03	5.11E+02
1.21E+03	5.10E+02
1.21E+03	5.08E+02
1.22E+03	5.11E+02
1.22E+03	5.09E+02
1.22E+03	5.09E+02
1.22E+03	5.08E+02
1.23E+03	5.10E+02
1.23E+03	5.11E+02
1.23E+03	5.14E+02
1.23E+03	5.11E+02
1.24E+03	5.10E+02
1.24E+03	5.10E+02
1.24E+03	5.10E+02
1.24E+03	5.15E+02
1.25E+03	5.14E+02
1.25E+03	5.13E+02
1.25E+03	5.10E+02
1.25E+03	5.15E+02
1.26E+03	5.09E+02
1.26E+03	5.14E+02
1.26E+03	5.12E+02
1.26E+03	5.14E+02
1.27E+03	5.15E+02
1.27E+03	5.16E+02
1.27E+03	5.13E+02
1.27E+03	5.17E+02
1.28E+03	5.18E+02
1.28E+03	5.18E+02
1.28E+03	5.17E+02
1.28E+03	5.18E+02
1.29E+03	5.21E+02
1.29E+03	5.18E+02
1.29E+03	5.25E+02
1.30E+03	5.27E+02
1.30E+03	5.27E+02
1.30E+03	5.30E+02
1.30E+03	5.33E+02
1.31E+03	5.41E+02
1.31E+03	5.43E+02
1.31E+03	5.45E+02
1.31E+03	5.50E+02
1.32E+03	5.55E+02
1.32E+03	5.66E+02
1.32E+03	5.75E+02
1.32E+03	5.84E+02
1.33E+03	5.94E+02
1.33E+03	6.05E+02
1.33E+03	6.18E+02
1.33E+03	6.33E+02
1.34E+03	6.45E+02
1.34E+03	6.60E+02
1.34E+03	6.75E+02
1.34E+03	6.85E+02
1.35E+03	7.00E+02
1.35E+03	7.16E+02
1.35E+03	7.26E+02
1.35E+03	7.40E+02
1.36E+03	7.49E+02
1.36E+03	7.54E+02
1.36E+03	7.59E+02
1.36E+03	7.66E+02
1.37E+03	7.63E+02
1.37E+03	7.55E+02
1.37E+03	7.45E+02
1.37E+03	7.21E+02
1.38E+03	7.02E+02
1.38E+03	6.73E+02
1.38E+03	6.48E+02
1.38E+03	6.22E+02
1.39E+03	5.96E+02
1.39E+03	5.83E+02
1.39E+03	5.65E+02
1.39E+03	5.51E+02
1.40E+03	5.44E+02
1.40E+03	5.40E+02
1.40E+03	5.31E+02
1.40E+03	5.30E+02
1.41E+03	5.26E+02
1.41E+03	5.24E+02
1.41E+03	5.23E+02
1.41E+03	5.21E+02
1.42E+03	5.19E+02
1.42E+03	5.21E+02
1.42E+03	5.20E+02
1.42E+03	5.18E+02
1.43E+03	5.17E+02
1.43E+03	5.15E+02
1.43E+03	5.18E+02
1.43E+03	5.16E+02
1.44E+03	5.17E+02
1.44E+03	5.17E+02
1.44E+03	5.18E+02
1.44E+03	5.17E+02
1.45E+03	5.18E+02
1.45E+03	5.16E+02
1.45E+03	5.13E+02
1.45E+03	5.13E+02
1.46E+03	5.13E+02
1.46E+03	5.13E+02
1.46E+03	5.16E+02
1.46E+03	5.15E+02
1.47E+03	5.14E+02
1.47E+03	5.14E+02
1.47E+03	5.15E+02
1.47E+03	5.16E+02
1.48E+03	5.17E+02
1.48E+03	5.17E+02
1.48E+03	5.23E+02
1.48E+03	5.21E+02
1.49E+03	5.21E+02
1.49E+03	5.21E+02
1.49E+03	5.19E+02
1.49E+03	5.20E+02
1.50E+03	5.17E+02
1.50E+03	5.20E+02
1.50E+03	5.21E+02
1.50E+03	5.19E+02
1.50E+03	5.20E+02
1.51E+03	5.22E+02
1.51E+03	5.19E+02
1.51E+03	5.20E+02
1.51E+03	5.20E+02
1.52E+03	5.22E+02
1.52E+03	5.22E+02
1.52E+03	5.23E+02
1.52E+03	5.25E+02
1.53E+03	5.25E+02
1.53E+03	5.28E+02
1.53E+03	5.30E+02
1.53E+03	5.29E+02
1.54E+03	5.38E+02
1.54E+03	5.40E+02
1.54E+03	5.39E+02
1.54E+03	5.50E+02
1.55E+03	5.49E+02
1.55E+03	5.56E+02
1.55E+03	5.66E+02
1.55E+03	5.78E+02
1.56E+03	5.92E+02
1.56E+03	6.12E+02
1.56E+03	6.39E+02
1.56E+03	6.77E+02
1.57E+03	7.30E+02
1.57E+03	8.18E+02
1.57E+03	9.24E+02
1.57E+03	1.05E+03
1.58E+03	1.16E+03
1.58E+03	1.24E+03
1.58E+03	1.25E+03
1.58E+03	1.22E+03
1.59E+03	1.12E+03
1.59E+03	1.01E+03
1.59E+03	8.93E+02
1.59E+03	8.00E+02
1.60E+03	7.17E+02
1.60E+03	6.69E+02
1.60E+03	6.40E+02
1.60E+03	6.11E+02
1.61E+03	5.98E+02
1.61E+03	5.86E+02
1.61E+03	5.81E+02
1.61E+03	5.80E+02
1.62E+03	5.89E+02
1.62E+03	5.88E+02
1.62E+03	5.91E+02
1.62E+03	5.83E+02
1.62E+03	5.73E+02
1.63E+03	5.65E+02
1.63E+03	5.51E+02
1.63E+03	5.39E+02
1.63E+03	5.29E+02
1.64E+03	5.26E+02
1.64E+03	5.21E+02
1.64E+03	5.17E+02
1.64E+03	5.16E+02
1.65E+03	5.18E+02
1.65E+03	5.15E+02
1.65E+03	5.16E+02
1.65E+03	5.17E+02
1.66E+03	5.13E+02
1.66E+03	5.14E+02
1.66E+03	5.12E+02
1.66E+03	5.13E+02
1.67E+03	5.13E+02
1.67E+03	5.12E+02
1.67E+03	5.12E+02
1.67E+03	5.10E+02
1.68E+03	5.12E+02
1.68E+03	5.10E+02
1.68E+03	5.12E+02
1.68E+03	5.10E+02
1.69E+03	5.09E+02
1.69E+03	5.11E+02
1.69E+03	5.11E+02
1.69E+03	5.13E+02
1.70E+03	5.10E+02
1.70E+03	5.11E+02
1.70E+03	5.09E+02
1.70E+03	5.07E+02
1.70E+03	5.10E+02
1.71E+03	5.09E+02
1.71E+03	5.08E+02
1.71E+03	5.07E+02
1.71E+03	5.08E+02
1.72E+03	5.08E+02
1.72E+03	5.08E+02
1.72E+03	5.08E+02
1.72E+03	5.08E+02
1.73E+03	5.09E+02
1.73E+03	5.09E+02
1.73E+03	5.08E+02
1.73E+03	5.11E+02
1.74E+03	5.08E+02
1.74E+03	5.09E+02
1.74E+03	5.11E+02
1.74E+03	5.10E+02
1.75E+03	5.10E+02
1.75E+03	5.11E+02
1.75E+03	5.12E+02
1.75E+03	5.12E+02
1.76E+03	5.11E+02
1.76E+03	5.13E+02
1.76E+03	5.13E+02
1.76E+03	5.13E+02
1.76E+03	5.13E+02
1.77E+03	5.12E+02
1.77E+03	5.13E+02
1.77E+03	5.12E+02
1.77E+03	5.10E+02
1.78E+03	5.11E+02
1.78E+03	5.13E+02
1.78E+03	5.11E+02
1.78E+03	5.09E+02
1.79E+03	5.08E+02
1.79E+03	5.12E+02
1.79E+03	5.07E+02
1.79E+03	5.06E+02
1.80E+03	5.06E+02
1.80E+03	5.07E+02
1.80E+03	5.08E+02
1.80E+03	5.08E+02
1.81E+03	5.06E+02
1.81E+03	5.05E+02
1.81E+03	5.06E+02
1.81E+03	5.07E+02
1.81E+03	5.07E+02
1.82E+03	5.05E+02
1.82E+03	5.06E+02
1.82E+03	5.06E+02
1.82E+03	5.07E+02
1.83E+03	5.05E+02
1.83E+03	5.07E+02
1.83E+03	5.06E+02
1.83E+03	5.05E+02
1.84E+03	5.07E+02
1.84E+03	5.05E+02
1.84E+03	5.07E+02
1.84E+03	5.06E+02
1.85E+03	5.06E+02
1.85E+03	5.06E+02
1.85E+03	5.04E+02
1.85E+03	5.05E+02
1.85E+03	5.06E+02
1.86E+03	5.07E+02
1.86E+03	5.04E+02
1.86E+03	5.06E+02
1.86E+03	5.05E+02
1.87E+03	5.05E+02
1.87E+03	5.05E+02
1.87E+03	5.05E+02
1.87E+03	5.06E+02
1.88E+03	5.04E+02
1.88E+03	5.04E+02
1.88E+03	5.05E+02
1.88E+03	5.07E+02
1.89E+03	5.05E+02
1.89E+03	5.06E+02
1.89E+03	5.07E+02
1.89E+03	5.05E+02
1.89E+03	5.06E+02
1.90E+03	5.05E+02
1.90E+03	5.07E+02
1.90E+03	5.06E+02
1.90E+03	5.05E+02
1.91E+03	5.08E+02
1.91E+03	5.05E+02
1.91E+03	5.06E+02
1.91E+03	5.06E+02
1.92E+03	5.07E+02
1.92E+03	5.07E+02
1.92E+03	5.06E+02
1.92E+03	5.06E+02
1.93E+03	5.06E+02
1.93E+03	5.07E+02
1.93E+03	5.06E+02
1.93E+03	5.05E+02
1.93E+03	5.05E+02
1.94E+03	5.06E+02
1.94E+03	5.06E+02
1.94E+03	5.07E+02
1.94E+03	5.07E+02
1.95E+03	5.08E+02
1.95E+03	5.05E+02
1.95E+03	5.05E+02
1.95E+03	5.06E+02
1.96E+03	5.07E+02
1.96E+03	5.07E+02
1.96E+03	5.06E+02
1.96E+03	5.08E+02
1.96E+03	5.05E+02
1.97E+03	5.06E+02
1.97E+03	5.08E+02
1.97E+03	5.06E+02
1.97E+03	5.06E+02
1.98E+03	5.08E+02
1.98E+03	5.06E+02
1.98E+03	5.07E+02
1.98E+03	5.07E+02
1.99E+03	5.08E+02
1.99E+03	5.08E+02
1.99E+03	5.05E+02
1.99E+03	5.06E+02
2.00E+03	5.08E+02
2.00E+03	5.08E+02
2.00E+03	5.08E+02
2.00E+03	5.07E+02
2.00E+03	5.08E+02
2.01E+03	5.08E+02
2.01E+03	5.07E+02
2.01E+03	5.06E+02
2.01E+03	5.08E+02
2.02E+03	5.06E+02
2.02E+03	5.06E+02
2.02E+03	5.07E+02
2.02E+03	5.07E+02
2.03E+03	5.06E+02
2.03E+03	5.09E+02
2.03E+03	5.06E+02
2.03E+03	5.06E+02
2.03E+03	5.08E+02
2.04E+03	5.12E+02
2.04E+03	5.10E+02
2.04E+03	5.09E+02
2.04E+03	5.08E+02
2.05E+03	5.08E+02
2.05E+03	5.08E+02
2.05E+03	5.09E+02
2.05E+03	5.09E+02
2.06E+03	5.07E+02
2.06E+03	5.07E+02
2.06E+03	5.06E+02
2.06E+03	5.06E+02
2.06E+03	5.05E+02
2.07E+03	5.06E+02
2.07E+03	5.06E+02
2.07E+03	5.05E+02
2.07E+03	5.04E+02
2.08E+03	5.07E+02
2.08E+03	5.05E+02
2.08E+03	5.04E+02
2.08E+03	5.06E+02
2.09E+03	5.07E+02
2.09E+03	5.04E+02
2.09E+03	5.04E+02
2.09E+03	5.04E+02
2.09E+03	5.04E+02
2.10E+03	5.04E+02
2.10E+03	5.04E+02
2.10E+03	5.04E+02
2.10E+03	5.04E+02
2.11E+03	5.03E+02
2.11E+03	5.07E+02
2.11E+03	5.05E+02
2.11E+03	5.05E+02
2.11E+03	5.05E+02
2.12E+03	5.04E+02
2.12E+03	5.04E+02
2.12E+03	5.06E+02
2.12E+03	5.03E+02
2.13E+03	5.06E+02
2.13E+03	5.03E+02
2.13E+03	5.04E+02
2.13E+03	5.06E+02
2.14E+03	5.02E+02
2.14E+03	5.04E+02
2.14E+03	5.06E+02
2.14E+03	5.05E+02
2.14E+03	5.03E+02
2.15E+03	5.04E+02
2.15E+03	5.04E+02
2.15E+03	5.06E+02
2.15E+03	5.04E+02
2.16E+03	5.05E+02
2.16E+03	5.03E+02
2.16E+03	5.04E+02
2.16E+03	5.03E+02
2.16E+03	5.04E+02
2.17E+03	5.05E+02
2.17E+03	5.02E+02
2.17E+03	5.06E+02
2.17E+03	5.04E+02
2.18E+03	5.03E+02
2.18E+03	5.03E+02
2.18E+03	5.06E+02
2.18E+03	5.05E+02
2.19E+03	5.04E+02
2.19E+03	5.07E+02
2.19E+03	5.07E+02
2.19E+03	5.04E+02
2.19E+03	5.05E+02
2.20E+03	5.03E+02
2.20E+03	5.06E+02
2.20E+03	5.05E+02
2.20E+03	5.03E+02
2.21E+03	5.06E+02
2.21E+03	5.06E+02
2.21E+03	5.05E+02
2.21E+03	5.04E+02
2.21E+03	5.05E+02
2.22E+03	5.04E+02
2.22E+03	5.06E+02
2.22E+03	5.05E+02
2.22E+03	5.05E+02
2.23E+03	5.06E+02
2.23E+03	5.06E+02
2.23E+03	5.04E+02
2.23E+03	5.05E+02
2.23E+03	5.06E+02
2.24E+03	5.06E+02
2.24E+03	5.06E+02
2.24E+03	5.06E+02
2.24E+03	5.05E+02
2.25E+03	5.02E+02
2.25E+03	5.03E+02
2.25E+03	5.02E+02
2.25E+03	5.05E+02
2.26E+03	5.04E+02
2.26E+03	5.05E+02
2.26E+03	5.04E+02
2.26E+03	5.04E+02
2.26E+03	5.06E+02
2.27E+03	5.03E+02
2.27E+03	5.06E+02
2.27E+03	5.06E+02
2.27E+03	5.03E+02
2.28E+03	5.04E+02
2.28E+03	5.05E+02
2.28E+03	5.05E+02
2.28E+03	5.05E+02
2.28E+03	5.03E+02
2.29E+03	5.04E+02
2.29E+03	5.08E+02
2.29E+03	5.05E+02
2.29E+03	5.03E+02
2.30E+03	5.07E+02
2.30E+03	5.04E+02
2.30E+03	5.05E+02
2.30E+03	5.04E+02
2.30E+03	5.05E+02
2.31E+03	5.06E+02
2.31E+03	5.07E+02
2.31E+03	5.04E+02
2.31E+03	5.06E+02
2.32E+03	5.05E+02
2.32E+03	5.09E+02
2.32E+03	5.06E+02
2.32E+03	5.07E+02
2.32E+03	5.07E+02
2.33E+03	5.06E+02
2.33E+03	5.06E+02
2.33E+03	5.05E+02
2.33E+03	5.07E+02
2.34E+03	5.05E+02
2.34E+03	5.07E+02
2.34E+03	5.06E+02
2.34E+03	5.06E+02
2.34E+03	5.07E+02
2.35E+03	5.06E+02
2.35E+03	5.08E+02
2.35E+03	5.08E+02
2.35E+03	5.05E+02
2.36E+03	5.07E+02
2.36E+03	5.07E+02
2.36E+03	5.08E+02
2.36E+03	5.09E+02
2.36E+03	5.08E+02
2.37E+03	5.08E+02
2.37E+03	5.07E+02
2.37E+03	5.08E+02
2.37E+03	5.07E+02
2.38E+03	5.07E+02
2.38E+03	5.08E+02
2.38E+03	5.09E+02
2.38E+03	5.10E+02
2.38E+03	5.08E+02
2.39E+03	5.07E+02
2.39E+03	5.09E+02
2.39E+03	5.09E+02
2.39E+03	5.08E+02
2.40E+03	5.08E+02
2.40E+03	5.08E+02
2.40E+03	5.09E+02
2.40E+03	5.08E+02
2.40E+03	5.11E+02
2.41E+03	5.09E+02
2.41E+03	5.09E+02
2.41E+03	5.12E+02
2.41E+03	5.08E+02
2.41E+03	5.11E+02
2.42E+03	5.11E+02
2.42E+03	5.15E+02
2.42E+03	5.13E+02
2.42E+03	5.14E+02
2.43E+03	5.13E+02
2.43E+03	5.18E+02
2.43E+03	5.19E+02
2.43E+03	5.22E+02
2.43E+03	5.25E+02
2.44E+03	5.27E+02
2.44E+03	5.30E+02
2.44E+03	5.31E+02
2.44E+03	5.35E+02
2.45E+03	5.37E+02
2.45E+03	5.35E+02
2.45E+03	5.37E+02
2.45E+03	5.36E+02
2.45E+03	5.35E+02
2.46E+03	5.34E+02
2.46E+03	5.33E+02
2.46E+03	5.37E+02
2.46E+03	5.34E+02
2.47E+03	5.33E+02
2.47E+03	5.35E+02
2.47E+03	5.33E+02
2.47E+03	5.30E+02
2.47E+03	5.29E+02
2.48E+03	5.28E+02
2.48E+03	5.25E+02
2.48E+03	5.26E+02
2.48E+03	5.26E+02
2.48E+03	5.26E+02
2.49E+03	5.27E+02
2.49E+03	5.25E+02
2.49E+03	5.23E+02
2.49E+03	5.22E+02
2.50E+03	5.24E+02
2.50E+03	5.23E+02
2.50E+03	5.20E+02
2.50E+03	5.22E+02
2.50E+03	5.22E+02
2.51E+03	5.22E+02
2.51E+03	5.22E+02
2.51E+03	5.19E+02
2.51E+03	5.18E+02
2.52E+03	5.17E+02
2.52E+03	5.20E+02
2.52E+03	5.20E+02
2.52E+03	5.21E+02
2.52E+03	5.20E+02
2.53E+03	5.20E+02
2.53E+03	5.24E+02
2.53E+03	5.21E+02
2.53E+03	5.22E+02
2.53E+03	5.22E+02
2.54E+03	5.19E+02
2.54E+03	5.21E+02
2.54E+03	5.24E+02
2.54E+03	5.21E+02
2.55E+03	5.22E+02
2.55E+03	5.19E+02
2.55E+03	5.21E+02
2.55E+03	5.21E+02
2.55E+03	5.23E+02
2.56E+03	5.23E+02
2.56E+03	5.21E+02
2.56E+03	5.23E+02
2.56E+03	5.24E+02
2.56E+03	5.22E+02
2.57E+03	5.24E+02
2.57E+03	5.25E+02
2.57E+03	5.27E+02
2.57E+03	5.26E+02
2.58E+03	5.24E+02
2.58E+03	5.23E+02
2.58E+03	5.28E+02
2.58E+03	5.32E+02
2.58E+03	5.30E+02
2.59E+03	5.31E+02
2.59E+03	5.32E+02
2.59E+03	5.34E+02
2.59E+03	5.36E+02
2.59E+03	5.35E+02
2.60E+03	5.30E+02
2.60E+03	5.35E+02
2.60E+03	5.36E+02
2.60E+03	5.36E+02
2.61E+03	5.35E+02
2.61E+03	5.37E+02
2.61E+03	5.40E+02
2.61E+03	5.38E+02
2.61E+03	5.42E+02
2.62E+03	5.44E+02
2.62E+03	5.42E+02
2.62E+03	5.46E+02
2.62E+03	5.48E+02
2.62E+03	5.49E+02
2.63E+03	5.51E+02
2.63E+03	5.54E+02
2.63E+03	5.57E+02
2.63E+03	5.57E+02
2.64E+03	5.59E+02
2.64E+03	5.60E+02
2.64E+03	5.63E+02
2.64E+03	5.67E+02
2.64E+03	5.75E+02
2.65E+03	5.81E+02
2.65E+03	5.84E+02
2.65E+03	5.92E+02
2.65E+03	5.94E+02
2.65E+03	6.03E+02
2.66E+03	6.09E+02
2.66E+03	6.18E+02
2.66E+03	6.25E+02
2.66E+03	6.30E+02
2.67E+03	6.45E+02
2.67E+03	6.52E+02
2.67E+03	6.62E+02
2.67E+03	6.66E+02
2.67E+03	6.76E+02
2.68E+03	6.75E+02
2.68E+03	6.88E+02
2.68E+03	6.99E+02
2.68E+03	6.98E+02
2.68E+03	7.07E+02
2.69E+03	7.08E+02
2.69E+03	7.15E+02
2.69E+03	7.16E+02
2.69E+03	7.24E+02
2.69E+03	7.33E+02
2.70E+03	7.42E+02
2.70E+03	7.44E+02
2.70E+03	7.54E+02
2.70E+03	7.64E+02
2.71E+03	7.78E+02
2.71E+03	7.91E+02
2.71E+03	8.04E+02
2.71E+03	8.26E+02
2.71E+03	8.44E+02
2.72E+03	8.73E+02
2.72E+03	9.04E+02
2.72E+03	9.16E+02
2.72E+03	9.44E+02
2.72E+03	9.45E+02
2.73E+03	9.54E+02
2.73E+03	9.48E+02
2.73E+03	9.34E+02
2.73E+03	9.24E+02
2.73E+03	9.01E+02
2.74E+03	8.75E+02
2.74E+03	8.40E+02
2.74E+03	8.24E+02
2.74E+03	7.96E+02
2.75E+03	7.86E+02
2.75E+03	7.64E+02
2.75E+03	7.40E+02
2.75E+03	7.10E+02
2.75E+03	7.00E+02
2.76E+03	6.82E+02
2.76E+03	6.65E+02
2.76E+03	6.54E+02
2.76E+03	6.39E+02
2.76E+03	6.23E+02
2.77E+03	6.13E+02
2.77E+03	6.01E+02
2.77E+03	5.92E+02
2.77E+03	5.89E+02
2.77E+03	5.84E+02
2.78E+03	5.78E+02
2.78E+03	5.73E+02
2.78E+03	5.67E+02
2.78E+03	5.61E+02
2.79E+03	5.65E+02
2.79E+03	5.61E+02
2.79E+03	5.61E+02
2.79E+03	5.57E+02
2.79E+03	5.53E+02
2.80E+03	5.51E+02
2.80E+03	5.53E+02
2.80E+03	5.53E+02
2.80E+03	5.53E+02
2.80E+03	5.48E+02
2.81E+03	5.45E+02
2.81E+03	5.46E+02
2.81E+03	5.44E+02
2.81E+03	5.43E+02
2.81E+03	5.44E+02
2.82E+03	5.43E+02
2.82E+03	5.42E+02
2.82E+03	5.44E+02
2.82E+03	5.43E+02
2.82E+03	5.43E+02
2.83E+03	5.40E+02
2.83E+03	5.42E+02
2.83E+03	5.41E+02
2.83E+03	5.42E+02
2.84E+03	5.40E+02
2.84E+03	5.42E+02
2.84E+03	5.42E+02
2.84E+03	5.42E+02
2.84E+03	5.39E+02
2.85E+03	5.38E+02
2.85E+03	5.42E+02
2.85E+03	5.38E+02
2.85E+03	5.38E+02
2.85E+03	5.40E+02
2.86E+03	5.39E+02
2.86E+03	5.40E+02
2.86E+03	5.38E+02
2.86E+03	5.41E+02
2.86E+03	5.44E+02
2.87E+03	5.44E+02
2.87E+03	5.42E+02
2.87E+03	5.42E+02
2.87E+03	5.41E+02
2.87E+03	5.41E+02
2.88E+03	5.42E+02
2.88E+03	5.41E+02
2.88E+03	5.44E+02
2.88E+03	5.38E+02
2.88E+03	5.41E+02
2.89E+03	5.41E+02
2.89E+03	5.41E+02
2.89E+03	5.45E+02
2.89E+03	5.40E+02
2.89E+03	5.43E+02
2.90E+03	5.44E+02
2.90E+03	5.43E+02
2.90E+03	5.43E+02
2.90E+03	5.47E+02
2.91E+03	5.43E+02
2.91E+03	5.43E+02
2.91E+03	5.45E+02
2.91E+03	5.44E+02
2.91E+03	5.43E+02
2.92E+03	5.47E+02
2.92E+03	5.47E+02
2.92E+03	5.42E+02
2.92E+03	5.51E+02
2.92E+03	5.47E+02
2.93E+03	5.50E+02
2.93E+03	5.51E+02
2.93E+03	5.49E+02
2.93E+03	5.54E+02
2.93E+03	5.51E+02
2.94E+03	5.51E+02
2.94E+03	5.51E+02
2.94E+03	5.54E+02
2.94E+03	5.53E+02
2.94E+03	5.55E+02
2.95E+03	5.55E+02
2.95E+03	5.55E+02
2.95E+03	5.56E+02
2.95E+03	5.58E+02
2.95E+03	5.58E+02
2.96E+03	5.56E+02
2.96E+03	5.57E+02
2.96E+03	5.55E+02
2.96E+03	5.55E+02
2.96E+03	5.60E+02
2.97E+03	5.57E+02
2.97E+03	5.56E+02
2.97E+03	5.54E+02
2.97E+03	5.55E+02
2.97E+03	5.53E+02
2.98E+03	5.53E+02
2.98E+03	5.51E+02
2.98E+03	5.53E+02
2.98E+03	5.50E+02
2.98E+03	5.51E+02
2.99E+03	5.47E+02
2.99E+03	5.47E+02
2.99E+03	5.46E+02
2.99E+03	5.48E+02
2.99E+03	5.45E+02
3.00E+03	5.44E+02
3.00E+03	5.46E+02
3.00E+03	5.42E+02
3.00E+03	5.43E+02
3.01E+03	5.39E+02
3.01E+03	5.41E+02
3.01E+03	5.43E+02
3.01E+03	5.40E+02
3.01E+03	5.40E+02
3.02E+03	5.40E+02
3.02E+03	5.40E+02
3.02E+03	5.35E+02
3.02E+03	5.40E+02
3.02E+03	5.40E+02
3.03E+03	5.41E+02
3.03E+03	5.41E+02
3.03E+03	5.38E+02
3.03E+03	5.39E+02
3.03E+03	5.40E+02
3.04E+03	5.38E+02
3.04E+03	5.40E+02
3.04E+03	5.40E+02
3.04E+03	5.40E+02
3.04E+03	5.40E+02
3.05E+03	5.39E+02
3.05E+03	5.39E+02
3.05E+03	5.36E+02
3.05E+03	5.41E+02
3.05E+03	5.43E+02
3.06E+03	5.39E+02
3.06E+03	5.43E+02
3.06E+03	5.40E+02
3.06E+03	5.40E+02
3.06E+03	5.40E+02
3.07E+03	5.44E+02
3.07E+03	5.42E+02
3.07E+03	5.42E+02
3.07E+03	5.41E+02
3.07E+03	5.41E+02
3.08E+03	5.40E+02
3.08E+03	5.43E+02
3.08E+03	5.42E+02
3.08E+03	5.41E+02
3.08E+03	5.42E+02
3.09E+03	5.43E+02
3.09E+03	5.44E+02
3.09E+03	5.43E+02
3.09E+03	5.44E+02
3.09E+03	5.62E+02
3.10E+03	5.74E+02
3.10E+03	6.06E+02
3.10E+03	5.80E+02
3.10E+03	5.71E+02
3.10E+03	5.68E+02
3.11E+03	5.65E+02
3.11E+03	5.75E+02
3.11E+03	5.58E+02
3.11E+03	5.40E+02
3.11E+03	5.44E+02
3.12E+03	5.44E+02
3.12E+03	5.46E+02
3.12E+03	5.44E+02
3.12E+03	5.47E+02
3.12E+03	5.46E+02
3.13E+03	5.43E+02
3.13E+03	5.43E+02
3.13E+03	5.47E+02
3.13E+03	5.45E+02
3.13E+03	5.45E+02
3.14E+03	5.46E+02
3.14E+03	5.44E+02
3.14E+03	5.46E+02
3.14E+03	5.48E+02
3.14E+03	5.46E+02
3.15E+03	5.45E+02
3.15E+03	5.48E+02
3.15E+03	5.47E+02
3.15E+03	5.48E+02
3.15E+03	5.46E+02
3.16E+03	5.46E+02
3.16E+03	5.49E+02
3.16E+03	5.50E+02
3.16E+03	5.49E+02
3.16E+03	5.48E+02
3.17E+03	5.46E+02
3.17E+03	5.48E+02
3.17E+03	5.46E+02
3.17E+03	5.47E+02
3.17E+03	5.50E+02
3.18E+03	5.51E+02
3.18E+03	5.51E+02
3.18E+03	5.51E+02
3.18E+03	5.51E+02
3.18E+03	5.50E+02
3.19E+03	5.52E+02
3.19E+03	5.49E+02
3.19E+03	5.51E+02
3.19E+03	5.54E+02
3.19E+03	5.47E+02
3.19E+03	5.49E+02
3.20E+03	5.51E+02
3.20E+03	5.48E+02
3.20E+03	5.53E+02
3.20E+03	5.52E+02
3.20E+03	5.53E+02
3.21E+03	5.55E+02
3.21E+03	5.51E+02
3.21E+03	5.54E+02
3.21E+03	5.54E+02
3.21E+03	5.54E+02
3.22E+03	5.56E+02
3.22E+03	5.54E+02
3.22E+03	5.56E+02
3.22E+03	5.56E+02
3.22E+03	5.56E+02
3.23E+03	5.59E+02
3.23E+03	5.63E+02
3.23E+03	5.59E+02
3.23E+03	5.64E+02
3.23E+03	5.65E+02
3.24E+03	5.70E+02
3.24E+03	5.72E+02
3.24E+03	5.85E+02
3.24E+03	5.88E+02
3.24E+03	5.98E+02
3.25E+03	6.04E+02
3.25E+03	6.01E+02
3.25E+03	6.02E+02
3.25E+03	5.96E+02
3.25E+03	5.94E+02
3.26E+03	5.85E+02
3.26E+03	5.76E+02
3.26E+03	5.73E+02
3.26E+03	5.64E+02
3.26E+03	5.61E+02
3.27E+03	5.63E+02
3.27E+03	5.59E+02
3.27E+03	5.60E+02
3.27E+03	5.58E+02
3.27E+03	5.62E+02
3.28E+03	5.59E+02
3.28E+03	5.57E+02
3.28E+03	5.57E+02
3.28E+03	5.56E+02
3.28E+03	5.60E+02
3.29E+03	5.57E+02
3.29E+03	5.57E+02
3.29E+03	5.60E+02
3.29E+03	5.58E+02
3.29E+03	5.56E+02
3.29E+03	5.59E+02
3.30E+03	5.62E+02
3.30E+03	5.63E+02
3.30E+03	5.62E+02
3.30E+03	5.63E+02
3.30E+03	5.58E+02
3.31E+03	5.61E+02
3.31E+03	5.61E+02
3.31E+03	5.62E+02
3.31E+03	5.59E+02
3.31E+03	5.59E+02
3.32E+03	5.62E+02
3.32E+03	5.59E+02
3.32E+03	5.60E+02
3.32E+03	5.63E+02
3.32E+03	5.62E+02
3.33E+03	5.64E+02
3.33E+03	5.66E+02
3.33E+03	5.66E+02
3.33E+03	5.63E+02
3.33E+03	5.64E+02
3.34E+03	5.65E+02
3.34E+03	5.65E+02
3.34E+03	5.62E+02
3.34E+03	5.63E+02
3.34E+03	5.65E+02
3.35E+03	5.64E+02
3.35E+03	5.65E+02
3.35E+03	5.66E+02
3.35E+03	5.67E+02
3.35E+03	5.68E+02
3.35E+03	5.67E+02
3.36E+03	5.67E+02
3.36E+03	5.71E+02
3.36E+03	5.68E+02
3.36E+03	5.66E+02
3.36E+03	5.71E+02
3.37E+03	5.72E+02
3.37E+03	5.70E+02
3.37E+03	5.71E+02
3.37E+03	5.69E+02
3.37E+03	5.70E+02
3.38E+03	5.69E+02
3.38E+03	5.70E+02
3.38E+03	5.74E+02
3.38E+03	5.73E+02
3.38E+03	5.72E+02
3.39E+03	5.73E+02
3.39E+03	5.74E+02
3.39E+03	5.71E+02
3.39E+03	5.74E+02
3.39E+03	5.76E+02
3.40E+03	5.75E+02
3.40E+03	5.75E+02
3.40E+03	5.75E+02
3.40E+03	5.78E+02
3.40E+03	5.77E+02
3.40E+03	5.75E+02
3.41E+03	5.78E+02
3.41E+03	5.76E+02
3.41E+03	5.75E+02
3.41E+03	5.75E+02
3.41E+03	5.79E+02
3.42E+03	5.78E+02
3.42E+03	5.77E+02
3.42E+03	5.79E+02
3.42E+03	5.75E+02
3.42E+03	5.81E+02
3.43E+03	5.79E+02
3.43E+03	5.77E+02
3.43E+03	5.83E+02
3.43E+03	5.81E+02
3.43E+03	5.82E+02
3.44E+03	5.76E+02
3.44E+03	5.79E+02
3.44E+03	5.75E+02
3.44E+03	5.83E+02
3.44E+03	5.82E+02
3.44E+03	5.80E+02
3.45E+03	5.84E+02
3.45E+03	5.81E+02
3.45E+03	5.82E+02
3.45E+03	5.79E+02
3.45E+03	5.83E+02
3.46E+03	5.81E+02
3.46E+03	5.82E+02
3.46E+03	5.82E+02
3.46E+03	5.83E+02
3.46E+03	5.82E+02
3.47E+03	5.85E+02
3.47E+03	5.82E+02
3.47E+03	5.84E+02
3.47E+03	5.86E+02
3.47E+03	5.88E+02
3.48E+03	5.88E+02
3.48E+03	5.85E+02
3.48E+03	5.86E+02
3.48E+03	5.89E+02
3.48E+03	5.87E+02
3.48E+03	5.85E+02
3.49E+03	5.86E+02
3.49E+03	5.88E+02
3.49E+03	5.92E+02
3.49E+03	5.90E+02
3.49E+03	5.92E+02
3.50E+03	5.92E+02
3.50E+03	5.89E+02
3.50E+03	5.88E+02
3.50E+03	5.87E+02
3.50E+03	5.87E+02
3.51E+03	5.89E+02
3.51E+03	5.94E+02
3.51E+03	5.95E+02
3.51E+03	5.90E+02
3.51E+03	5.93E+02
3.51E+03	5.94E+02
3.52E+03	5.93E+02
3.52E+03	5.95E+02
3.52E+03	5.94E+02
3.52E+03	5.98E+02
3.52E+03	5.96E+02
3.53E+03	5.95E+02
3.53E+03	5.95E+02
3.53E+03	5.99E+02
3.53E+03	5.94E+02
3.53E+03	5.96E+02
3.54E+03	5.95E+02
3.54E+03	5.98E+02
3.54E+03	5.95E+02
3.54E+03	5.99E+02
3.54E+03	5.96E+02
3.54E+03	5.96E+02
3.55E+03	5.97E+02
3.55E+03	6.00E+02
3.55E+03	5.98E+02
3.55E+03	5.99E+02
3.55E+03	5.98E+02
3.56E+03	5.98E+02
3.56E+03	5.96E+02
3.56E+03	5.98E+02
3.56E+03	5.96E+02
3.56E+03	5.96E+02
3.57E+03	6.01E+02
3.57E+03	6.01E+02
3.57E+03	6.00E+02
3.57E+03	5.99E+02
3.57E+03	6.00E+02
3.57E+03	5.97E+02
3.58E+03	6.02E+02
3.58E+03	6.00E+02
3.58E+03	5.98E+02
3.58E+03	5.98E+02
3.58E+03	6.01E+02
3.59E+03	6.02E+02
3.59E+03	6.00E+02
3.59E+03	6.01E+02
3.59E+03	6.02E+02
3.59E+03	6.05E+02
3.60E+03	5.99E+02
3.60E+03	6.01E+02
3.60E+03	6.00E+02
3.60E+03	6.04E+02
3.60E+03	6.04E+02
3.60E+03	6.04E+02
3.61E+03	6.02E+02
3.61E+03	6.06E+02
3.61E+03	6.05E+02
3.61E+03	6.04E+02
3.61E+03	6.01E+02
3.62E+03	6.07E+02
3.62E+03	6.08E+02
3.62E+03	6.09E+02
3.62E+03	6.10E+02
3.62E+03	6.06E+02
3.62E+03	6.08E+02
3.63E+03	6.07E+02
3.63E+03	6.05E+02
3.63E+03	6.08E+02
3.63E+03	6.08E+02
3.63E+03	6.11E+02
3.64E+03	6.09E+02
3.64E+03	6.08E+02
3.64E+03	6.11E+02
3.64E+03	6.13E+02
3.64E+03	6.14E+02
3.65E+03	6.11E+02
3.65E+03	6.11E+02
3.65E+03	6.10E+02
3.65E+03	6.12E+02
3.65E+03	6.17E+02
3.65E+03	6.16E+02
3.66E+03	6.14E+02
3.66E+03	6.17E+02
3.66E+03	6.15E+02
3.66E+03	6.16E+02
3.66E+03	6.18E+02
3.67E+03	6.21E+02
3.67E+03	6.17E+02
3.67E+03	6.15E+02
3.67E+03	6.19E+02
3.67E+03	6.20E+02
3.67E+03	6.19E+02
3.68E+03	6.22E+02
3.68E+03	6.21E+02
3.68E+03	6.20E+02
3.68E+03	6.22E+02
3.68E+03	6.20E+02
3.69E+03	6.21E+02
3.69E+03	6.21E+02
3.69E+03	6.21E+02
3.69E+03	6.23E+02
3.69E+03	6.25E+02
3.69E+03	6.25E+02
3.70E+03	6.25E+02
3.70E+03	6.26E+02
3.70E+03	6.26E+02
3.70E+03	6.26E+02
3.70E+03	6.24E+02
3.71E+03	6.29E+02
3.71E+03	6.25E+02
3.71E+03	6.28E+02
3.71E+03	6.29E+02
3.71E+03	6.31E+02
3.72E+03	6.31E+02
3.72E+03	6.30E+02
3.72E+03	6.32E+02
3.72E+03	6.31E+02
3.72E+03	6.37E+02
3.72E+03	6.40E+02
3.73E+03	6.35E+02
3.73E+03	6.30E+02
3.73E+03	6.36E+02
3.73E+03	6.35E+02
3.73E+03	6.34E+02
3.74E+03	6.30E+02
3.74E+03	6.29E+02
3.74E+03	6.35E+02
3.74E+03	6.38E+02
3.74E+03	6.41E+02
3.74E+03	6.40E+02
3.75E+03	6.38E+02
3.75E+03	6.42E+02
3.75E+03	6.44E+02
3.75E+03	6.43E+02
3.75E+03	6.43E+02
3.76E+03	6.39E+02
3.76E+03	6.42E+02
3.76E+03	6.45E+02
3.76E+03	6.42E+02
3.76E+03	6.47E+02
3.76E+03	6.48E+02
3.77E+03	6.41E+02
3.77E+03	6.46E+02
3.77E+03	6.45E+02
3.77E+03	6.53E+02
3.77E+03	6.52E+02
3.78E+03	6.49E+02
3.78E+03	6.50E+02
3.78E+03	6.54E+02
3.78E+03	6.52E+02
3.78E+03	6.53E+02
3.78E+03	6.52E+02
3.79E+03	6.51E+02
3.79E+03	6.54E+02
3.79E+03	6.56E+02
3.79E+03	6.59E+02
3.79E+03	6.57E+02
3.80E+03	6.61E+02
3.80E+03	6.60E+02
3.80E+03	6.59E+02
3.80E+03	6.57E+02
3.80E+03	6.60E+02
3.80E+03	6.62E+02
3.81E+03	6.62E+02
3.81E+03	6.65E+02
3.81E+03	6.68E+02
3.81E+03	6.62E+02
3.81E+03	6.65E+02
3.81E+03	6.68E+02
3.82E+03	6.65E+02
3.82E+03	6.67E+02
3.82E+03	6.68E+02
3.82E+03	6.68E+02
3.82E+03	6.68E+02
3.83E+03	6.70E+02
3.83E+03	6.73E+02
3.83E+03	6.71E+02
3.83E+03	6.68E+02
3.83E+03	6.75E+02
3.83E+03	6.74E+02
3.84E+03	6.71E+02
3.84E+03	6.71E+02
3.84E+03	6.71E+02
3.84E+03	6.81E+02
3.84E+03	6.71E+02
3.85E+03	6.76E+02
3.85E+03	6.81E+02
3.85E+03	6.77E+02
3.85E+03	6.77E+02
3.85E+03	6.76E+02
3.85E+03	6.84E+02
3.86E+03	6.88E+02
3.86E+03	6.87E+02
3.86E+03	6.88E+02
3.86E+03	6.79E+02
3.86E+03	6.84E+02
3.87E+03	6.85E+02

## Sheet: 10055 2J
rel. 1/cm	CCD cts
9.47E+01	5.46E+02
9.76E+01	5.44E+02
1.00E+02	5.44E+02
1.03E+02	5.41E+02
1.06E+02	5.43E+02
1.09E+02	5.43E+02
1.12E+02	5.44E+02
1.15E+02	5.41E+02
1.18E+02	5.43E+02
1.21E+02	5.40E+02
1.24E+02	5.42E+02
1.27E+02	5.40E+02
1.30E+02	5.44E+02
1.32E+02	5.45E+02
1.35E+02	5.46E+02
1.38E+02	5.46E+02
1.41E+02	5.49E+02
1.44E+02	5.48E+02
1.47E+02	5.51E+02
1.50E+02	5.55E+02
1.53E+02	5.62E+02
1.56E+02	5.71E+02
1.59E+02	5.77E+02
1.61E+02	5.85E+02
1.64E+02	5.90E+02
1.67E+02	5.90E+02
1.70E+02	5.90E+02
1.73E+02	5.89E+02
1.76E+02	5.85E+02
1.79E+02	5.86E+02
1.82E+02	5.82E+02
1.85E+02	5.80E+02
1.87E+02	5.81E+02
1.90E+02	5.81E+02
1.93E+02	5.85E+02
1.96E+02	5.90E+02
1.99E+02	5.97E+02
2.02E+02	6.05E+02
2.05E+02	6.07E+02
2.08E+02	6.11E+02
2.10E+02	6.16E+02
2.13E+02	6.24E+02
2.16E+02	6.28E+02
2.19E+02	6.33E+02
2.22E+02	6.35E+02
2.25E+02	6.27E+02
2.28E+02	6.23E+02
2.31E+02	6.23E+02
2.33E+02	6.17E+02
2.36E+02	6.08E+02
2.39E+02	6.01E+02
2.42E+02	5.94E+02
2.45E+02	5.85E+02
2.48E+02	5.80E+02
2.51E+02	5.74E+02
2.53E+02	5.71E+02
2.56E+02	5.67E+02
2.59E+02	5.60E+02
2.62E+02	5.58E+02
2.65E+02	5.59E+02
2.68E+02	5.56E+02
2.71E+02	5.58E+02
2.73E+02	5.55E+02
2.76E+02	5.57E+02
2.79E+02	5.55E+02
2.82E+02	5.56E+02
2.85E+02	5.61E+02
2.88E+02	5.61E+02
2.91E+02	5.61E+02
2.93E+02	5.62E+02
2.96E+02	5.63E+02
2.99E+02	5.65E+02
3.02E+02	5.65E+02
3.05E+02	5.71E+02
3.08E+02	5.73E+02
3.10E+02	5.78E+02
3.13E+02	5.85E+02
3.16E+02	5.92E+02
3.19E+02	6.02E+02
3.22E+02	6.08E+02
3.25E+02	6.22E+02
3.28E+02	6.33E+02
3.30E+02	6.46E+02
3.33E+02	6.61E+02
3.36E+02	6.91E+02
3.39E+02	7.30E+02
3.42E+02	7.75E+02
3.45E+02	8.22E+02
3.47E+02	8.71E+02
3.50E+02	9.06E+02
3.53E+02	9.20E+02
3.56E+02	9.26E+02
3.59E+02	9.13E+02
3.62E+02	8.81E+02
3.64E+02	8.42E+02
3.67E+02	8.06E+02
3.70E+02	7.71E+02
3.73E+02	7.37E+02
3.76E+02	7.08E+02
3.78E+02	6.87E+02
3.81E+02	6.63E+02
3.84E+02	6.42E+02
3.87E+02	6.23E+02
3.90E+02	6.04E+02
3.93E+02	5.87E+02
3.95E+02	5.79E+02
3.98E+02	5.66E+02
4.01E+02	5.56E+02
4.04E+02	5.51E+02
4.07E+02	5.43E+02
4.09E+02	5.41E+02
4.12E+02	5.37E+02
4.15E+02	5.35E+02
4.18E+02	5.31E+02
4.21E+02	5.31E+02
4.23E+02	5.28E+02
4.26E+02	5.29E+02
4.29E+02	5.30E+02
4.32E+02	5.29E+02
4.35E+02	5.30E+02
4.37E+02	5.29E+02
4.40E+02	5.27E+02
4.43E+02	5.28E+02
4.46E+02	5.28E+02
4.49E+02	5.30E+02
4.51E+02	5.31E+02
4.54E+02	5.34E+02
4.57E+02	5.37E+02
4.60E+02	5.39E+02
4.63E+02	5.47E+02
4.65E+02	5.50E+02
4.68E+02	5.58E+02
4.71E+02	5.64E+02
4.74E+02	5.65E+02
4.77E+02	5.67E+02
4.79E+02	5.69E+02
4.82E+02	5.66E+02
4.85E+02	5.68E+02
4.88E+02	5.72E+02
4.91E+02	5.81E+02
4.93E+02	5.88E+02
4.96E+02	6.02E+02
4.99E+02	6.16E+02
5.02E+02	6.16E+02
5.04E+02	6.15E+02
5.07E+02	6.10E+02
5.10E+02	5.95E+02
5.13E+02	5.82E+02
5.16E+02	5.73E+02
5.18E+02	5.64E+02
5.21E+02	5.61E+02
5.24E+02	5.54E+02
5.27E+02	5.54E+02
5.29E+02	5.57E+02
5.32E+02	5.57E+02
5.35E+02	5.68E+02
5.38E+02	5.83E+02
5.41E+02	6.00E+02
5.43E+02	6.23E+02
5.46E+02	6.43E+02
5.49E+02	6.57E+02
5.52E+02	6.66E+02
5.54E+02	6.63E+02
5.57E+02	6.47E+02
5.60E+02	6.30E+02
5.63E+02	6.05E+02
5.65E+02	5.85E+02
5.68E+02	5.69E+02
5.71E+02	5.53E+02
5.74E+02	5.45E+02
5.76E+02	5.37E+02
5.79E+02	5.37E+02
5.82E+02	5.33E+02
5.85E+02	5.33E+02
5.87E+02	5.33E+02
5.90E+02	5.30E+02
5.93E+02	5.29E+02
5.96E+02	5.28E+02
5.98E+02	5.27E+02
6.01E+02	5.26E+02
6.04E+02	5.23E+02
6.07E+02	5.24E+02
6.09E+02	5.24E+02
6.12E+02	5.26E+02
6.15E+02	5.28E+02
6.18E+02	5.33E+02
6.20E+02	5.41E+02
6.23E+02	5.44E+02
6.26E+02	5.53E+02
6.29E+02	5.55E+02
6.31E+02	5.59E+02
6.34E+02	5.57E+02
6.37E+02	5.53E+02
6.40E+02	5.44E+02
6.42E+02	5.36E+02
6.45E+02	5.32E+02
6.48E+02	5.28E+02
6.51E+02	5.23E+02
6.53E+02	5.19E+02
6.56E+02	5.17E+02
6.59E+02	5.16E+02
6.61E+02	5.12E+02
6.64E+02	5.13E+02
6.67E+02	5.13E+02
6.70E+02	5.11E+02
6.72E+02	5.10E+02
6.75E+02	5.11E+02
6.78E+02	5.12E+02
6.81E+02	5.10E+02
6.83E+02	5.09E+02
6.86E+02	5.10E+02
6.89E+02	5.08E+02
6.91E+02	5.10E+02
6.94E+02	5.09E+02
6.97E+02	5.09E+02
7.00E+02	5.09E+02
7.02E+02	5.11E+02
7.05E+02	5.10E+02
7.08E+02	5.10E+02
7.10E+02	5.09E+02
7.13E+02	5.08E+02
7.16E+02	5.10E+02
7.19E+02	5.10E+02
7.21E+02	5.08E+02
7.24E+02	5.09E+02
7.27E+02	5.10E+02
7.29E+02	5.10E+02
7.32E+02	5.12E+02
7.35E+02	5.09E+02
7.38E+02	5.12E+02
7.40E+02	5.11E+02
7.43E+02	5.11E+02
7.46E+02	5.09E+02
7.48E+02	5.11E+02
7.51E+02	5.11E+02
7.54E+02	5.13E+02
7.57E+02	5.13E+02
7.59E+02	5.13E+02
7.62E+02	5.14E+02
7.65E+02	5.15E+02
7.67E+02	5.15E+02
7.70E+02	5.14E+02
7.73E+02	5.17E+02
7.75E+02	5.15E+02
7.78E+02	5.18E+02
7.81E+02	5.18E+02
7.83E+02	5.18E+02
7.86E+02	5.21E+02
7.89E+02	5.22E+02
7.92E+02	5.25E+02
7.94E+02	5.28E+02
7.97E+02	5.31E+02
8.00E+02	5.35E+02
8.02E+02	5.39E+02
8.05E+02	5.43E+02
8.08E+02	5.50E+02
8.10E+02	5.53E+02
8.13E+02	5.56E+02
8.16E+02	5.61E+02
8.18E+02	5.63E+02
8.21E+02	5.69E+02
8.24E+02	5.74E+02
8.26E+02	5.84E+02
8.29E+02	5.95E+02
8.32E+02	6.14E+02
8.34E+02	6.38E+02
8.37E+02	6.58E+02
8.40E+02	6.84E+02
8.42E+02	7.03E+02
8.45E+02	7.16E+02
8.48E+02	7.20E+02
8.50E+02	7.13E+02
8.53E+02	6.99E+02
8.56E+02	6.84E+02
8.58E+02	6.72E+02
8.61E+02	6.63E+02
8.64E+02	6.59E+02
8.66E+02	6.65E+02
8.69E+02	6.73E+02
8.72E+02	6.89E+02
8.74E+02	7.06E+02
8.77E+02	7.30E+02
8.80E+02	7.60E+02
8.82E+02	7.97E+02
8.85E+02	8.54E+02
8.88E+02	9.46E+02
8.90E+02	1.07E+03
8.93E+02	1.24E+03
8.96E+02	1.43E+03
8.98E+02	1.63E+03
9.01E+02	1.76E+03
9.04E+02	1.81E+03
9.06E+02	1.76E+03
9.09E+02	1.61E+03
9.12E+02	1.42E+03
9.14E+02	1.25E+03
9.17E+02	1.07E+03
9.20E+02	9.26E+02
9.22E+02	8.18E+02
9.25E+02	7.41E+02
9.28E+02	6.94E+02
9.30E+02	6.54E+02
9.33E+02	6.30E+02
9.35E+02	6.09E+02
9.38E+02	5.93E+02
9.41E+02	5.87E+02
9.43E+02	5.79E+02
9.46E+02	5.71E+02
9.49E+02	5.63E+02
9.51E+02	5.62E+02
9.54E+02	5.60E+02
9.57E+02	5.55E+02
9.59E+02	5.56E+02
9.62E+02	5.53E+02
9.65E+02	5.50E+02
9.67E+02	5.49E+02
9.70E+02	5.48E+02
9.72E+02	5.47E+02
9.75E+02	5.45E+02
9.78E+02	5.41E+02
9.80E+02	5.41E+02
9.83E+02	5.40E+02
9.86E+02	5.40E+02
9.88E+02	5.40E+02
9.91E+02	5.44E+02
9.93E+02	5.45E+02
9.96E+02	5.47E+02
9.99E+02	5.52E+02
1.00E+03	5.55E+02
1.00E+03	5.59E+02
1.01E+03	5.67E+02
1.01E+03	5.68E+02
1.01E+03	5.79E+02
1.01E+03	5.89E+02
1.02E+03	6.02E+02
1.02E+03	6.15E+02
1.02E+03	6.22E+02
1.02E+03	6.32E+02
1.03E+03	6.41E+02
1.03E+03	6.39E+02
1.03E+03	6.30E+02
1.04E+03	6.15E+02
1.04E+03	5.99E+02
1.04E+03	5.79E+02
1.04E+03	5.64E+02
1.05E+03	5.52E+02
1.05E+03	5.41E+02
1.05E+03	5.36E+02
1.05E+03	5.30E+02
1.06E+03	5.26E+02
1.06E+03	5.27E+02
1.06E+03	5.26E+02
1.06E+03	5.21E+02
1.07E+03	5.20E+02
1.07E+03	5.18E+02
1.07E+03	5.19E+02
1.07E+03	5.19E+02
1.08E+03	5.19E+02
1.08E+03	5.18E+02
1.08E+03	5.17E+02
1.08E+03	5.21E+02
1.09E+03	5.18E+02
1.09E+03	5.16E+02
1.09E+03	5.17E+02
1.10E+03	5.15E+02
1.10E+03	5.18E+02
1.10E+03	5.16E+02
1.10E+03	5.15E+02
1.11E+03	5.15E+02
1.11E+03	5.16E+02
1.11E+03	5.15E+02
1.11E+03	5.14E+02
1.12E+03	5.14E+02
1.12E+03	5.12E+02
1.12E+03	5.13E+02
1.12E+03	5.13E+02
1.13E+03	5.14E+02
1.13E+03	5.14E+02
1.13E+03	5.14E+02
1.13E+03	5.12E+02
1.14E+03	5.13E+02
1.14E+03	5.15E+02
1.14E+03	5.15E+02
1.14E+03	5.14E+02
1.15E+03	5.16E+02
1.15E+03	5.13E+02
1.15E+03	5.16E+02
1.15E+03	5.16E+02
1.16E+03	5.15E+02
1.16E+03	5.19E+02
1.16E+03	5.16E+02
1.16E+03	5.16E+02
1.17E+03	5.18E+02
1.17E+03	5.18E+02
1.17E+03	5.15E+02
1.18E+03	5.16E+02
1.18E+03	5.17E+02
1.18E+03	5.16E+02
1.18E+03	5.17E+02
1.19E+03	5.17E+02
1.19E+03	5.16E+02
1.19E+03	5.15E+02
1.19E+03	5.13E+02
1.20E+03	5.13E+02
1.20E+03	5.15E+02
1.20E+03	5.14E+02
1.20E+03	5.13E+02
1.21E+03	5.16E+02
1.21E+03	5.12E+02
1.21E+03	5.13E+02
1.21E+03	5.13E+02
1.22E+03	5.13E+02
1.22E+03	5.09E+02
1.22E+03	5.13E+02
1.22E+03	5.12E+02
1.23E+03	5.12E+02
1.23E+03	5.11E+02
1.23E+03	5.12E+02
1.23E+03	5.15E+02
1.24E+03	5.13E+02
1.24E+03	5.12E+02
1.24E+03	5.14E+02
1.24E+03	5.15E+02
1.25E+03	5.12E+02
1.25E+03	5.13E+02
1.25E+03	5.13E+02
1.25E+03	5.16E+02
1.26E+03	5.14E+02
1.26E+03	5.14E+02
1.26E+03	5.15E+02
1.26E+03	5.14E+02
1.27E+03	5.15E+02
1.27E+03	5.15E+02
1.27E+03	5.11E+02
1.27E+03	5.15E+02
1.28E+03	5.14E+02
1.28E+03	5.14E+02
1.28E+03	5.13E+02
1.28E+03	5.16E+02
1.29E+03	5.14E+02
1.29E+03	5.13E+02
1.29E+03	5.11E+02
1.30E+03	5.13E+02
1.30E+03	5.12E+02
1.30E+03	5.12E+02
1.30E+03	5.15E+02
1.31E+03	5.13E+02
1.31E+03	5.14E+02
1.31E+03	5.11E+02
1.31E+03	5.12E+02
1.32E+03	5.13E+02
1.32E+03	5.12E+02
1.32E+03	5.14E+02
1.32E+03	5.14E+02
1.33E+03	5.15E+02
1.33E+03	5.16E+02
1.33E+03	5.18E+02
1.33E+03	5.20E+02
1.34E+03	5.21E+02
1.34E+03	5.22E+02
1.34E+03	5.22E+02
1.34E+03	5.22E+02
1.35E+03	5.22E+02
1.35E+03	5.24E+02
1.35E+03	5.26E+02
1.35E+03	5.28E+02
1.36E+03	5.26E+02
1.36E+03	5.25E+02
1.36E+03	5.25E+02
1.36E+03	5.26E+02
1.37E+03	5.22E+02
1.37E+03	5.22E+02
1.37E+03	5.19E+02
1.37E+03	5.18E+02
1.38E+03	5.17E+02
1.38E+03	5.16E+02
1.38E+03	5.14E+02
1.38E+03	5.12E+02
1.39E+03	5.11E+02
1.39E+03	5.11E+02
1.39E+03	5.10E+02
1.39E+03	5.11E+02
1.40E+03	5.11E+02
1.40E+03	5.08E+02
1.40E+03	5.08E+02
1.40E+03	5.10E+02
1.41E+03	5.09E+02
1.41E+03	5.09E+02
1.41E+03	5.10E+02
1.41E+03	5.09E+02
1.42E+03	5.10E+02
1.42E+03	5.07E+02
1.42E+03	5.10E+02
1.42E+03	5.10E+02
1.43E+03	5.11E+02
1.43E+03	5.10E+02
1.43E+03	5.10E+02
1.43E+03	5.11E+02
1.44E+03	5.11E+02
1.44E+03	5.13E+02
1.44E+03	5.13E+02
1.44E+03	5.12E+02
1.45E+03	5.12E+02
1.45E+03	5.12E+02
1.45E+03	5.12E+02
1.45E+03	5.11E+02
1.46E+03	5.12E+02
1.46E+03	5.12E+02
1.46E+03	5.13E+02
1.46E+03	5.13E+02
1.47E+03	5.13E+02
1.47E+03	5.13E+02
1.47E+03	5.11E+02
1.47E+03	5.15E+02
1.48E+03	5.09E+02
1.48E+03	5.12E+02
1.48E+03	5.15E+02
1.48E+03	5.13E+02
1.49E+03	5.13E+02
1.49E+03	5.15E+02
1.49E+03	5.13E+02
1.49E+03	5.14E+02
1.50E+03	5.15E+02
1.50E+03	5.16E+02
1.50E+03	5.16E+02
1.50E+03	5.15E+02
1.50E+03	5.14E+02
1.51E+03	5.16E+02
1.51E+03	5.15E+02
1.51E+03	5.15E+02
1.51E+03	5.16E+02
1.52E+03	5.16E+02
1.52E+03	5.15E+02
1.52E+03	5.16E+02
1.52E+03	5.15E+02
1.53E+03	5.18E+02
1.53E+03	5.18E+02
1.53E+03	5.17E+02
1.53E+03	5.21E+02
1.54E+03	5.24E+02
1.54E+03	5.26E+02
1.54E+03	5.26E+02
1.54E+03	5.28E+02
1.55E+03	5.28E+02
1.55E+03	5.32E+02
1.55E+03	5.35E+02
1.55E+03	5.46E+02
1.56E+03	5.50E+02
1.56E+03	5.61E+02
1.56E+03	5.80E+02
1.56E+03	6.00E+02
1.57E+03	6.33E+02
1.57E+03	6.78E+02
1.57E+03	7.29E+02
1.57E+03	7.75E+02
1.58E+03	8.08E+02
1.58E+03	8.15E+02
1.58E+03	7.98E+02
1.58E+03	7.63E+02
1.59E+03	7.17E+02
1.59E+03	6.65E+02
1.59E+03	6.23E+02
1.59E+03	5.95E+02
1.60E+03	5.70E+02
1.60E+03	5.57E+02
1.60E+03	5.47E+02
1.60E+03	5.43E+02
1.61E+03	5.38E+02
1.61E+03	5.35E+02
1.61E+03	5.31E+02
1.61E+03	5.29E+02
1.62E+03	5.26E+02
1.62E+03	5.27E+02
1.62E+03	5.26E+02
1.62E+03	5.22E+02
1.62E+03	5.20E+02
1.63E+03	5.19E+02
1.63E+03	5.16E+02
1.63E+03	5.18E+02
1.63E+03	5.17E+02
1.64E+03	5.17E+02
1.64E+03	5.16E+02
1.64E+03	5.17E+02
1.64E+03	5.14E+02
1.65E+03	5.16E+02
1.65E+03	5.14E+02
1.65E+03	5.16E+02
1.65E+03	5.16E+02
1.66E+03	5.15E+02
1.66E+03	5.14E+02
1.66E+03	5.16E+02
1.66E+03	5.15E+02
1.67E+03	5.13E+02
1.67E+03	5.15E+02
1.67E+03	5.13E+02
1.67E+03	5.13E+02
1.68E+03	5.14E+02
1.68E+03	5.14E+02
1.68E+03	5.14E+02
1.68E+03	5.13E+02
1.69E+03	5.12E+02
1.69E+03	5.12E+02
1.69E+03	5.11E+02
1.69E+03	5.14E+02
1.70E+03	5.12E+02
1.70E+03	5.11E+02
1.70E+03	5.13E+02
1.70E+03	5.12E+02
1.70E+03	5.12E+02
1.71E+03	5.10E+02
1.71E+03	5.12E+02
1.71E+03	5.11E+02
1.71E+03	5.11E+02
1.72E+03	5.13E+02
1.72E+03	5.11E+02
1.72E+03	5.12E+02
1.72E+03	5.11E+02
1.73E+03	5.15E+02
1.73E+03	5.13E+02
1.73E+03	5.13E+02
1.73E+03	5.13E+02
1.74E+03	5.13E+02
1.74E+03	5.12E+02
1.74E+03	5.15E+02
1.74E+03	5.13E+02
1.75E+03	5.15E+02
1.75E+03	5.14E+02
1.75E+03	5.13E+02
1.75E+03	5.14E+02
1.76E+03	5.12E+02
1.76E+03	5.14E+02
1.76E+03	5.13E+02
1.76E+03	5.11E+02
1.76E+03	5.13E+02
1.77E+03	5.11E+02
1.77E+03	5.12E+02
1.77E+03	5.11E+02
1.77E+03	5.13E+02
1.78E+03	5.16E+02
1.78E+03	5.12E+02
1.78E+03	5.12E+02
1.78E+03	5.12E+02
1.79E+03	5.13E+02
1.79E+03	5.13E+02
1.79E+03	5.15E+02
1.79E+03	5.13E+02
1.80E+03	5.13E+02
1.80E+03	5.14E+02
1.80E+03	5.11E+02
1.80E+03	5.14E+02
1.81E+03	5.13E+02
1.81E+03	5.11E+02
1.81E+03	5.14E+02
1.81E+03	5.12E+02
1.81E+03	5.12E+02
1.82E+03	5.12E+02
1.82E+03	5.11E+02
1.82E+03	5.12E+02
1.82E+03	5.13E+02
1.83E+03	5.12E+02
1.83E+03	5.13E+02
1.83E+03	5.13E+02
1.83E+03	5.12E+02
1.84E+03	5.13E+02
1.84E+03	5.12E+02
1.84E+03	5.12E+02
1.84E+03	5.12E+02
1.85E+03	5.12E+02
1.85E+03	5.13E+02
1.85E+03	5.11E+02
1.85E+03	5.11E+02
1.85E+03	5.11E+02
1.86E+03	5.12E+02
1.86E+03	5.11E+02
1.86E+03	5.13E+02
1.86E+03	5.12E+02
1.87E+03	5.11E+02
1.87E+03	5.14E+02
1.87E+03	5.11E+02
1.87E+03	5.12E+02
1.88E+03	5.11E+02
1.88E+03	5.13E+02
1.88E+03	5.12E+02
1.88E+03	5.12E+02
1.89E+03	5.12E+02
1.89E+03	5.15E+02
1.89E+03	5.12E+02
1.89E+03	5.13E+02
1.89E+03	5.13E+02
1.90E+03	5.12E+02
1.90E+03	5.13E+02
1.90E+03	5.13E+02
1.90E+03	5.13E+02
1.91E+03	5.14E+02
1.91E+03	5.14E+02
1.91E+03	5.15E+02
1.91E+03	5.13E+02
1.92E+03	5.13E+02
1.92E+03	5.14E+02
1.92E+03	5.13E+02
1.92E+03	5.12E+02
1.93E+03	5.13E+02
1.93E+03	5.14E+02
1.93E+03	5.11E+02
1.93E+03	5.14E+02
1.93E+03	5.14E+02
1.94E+03	5.13E+02
1.94E+03	5.15E+02
1.94E+03	5.13E+02
1.94E+03	5.13E+02
1.95E+03	5.13E+02
1.95E+03	5.14E+02
1.95E+03	5.13E+02
1.95E+03	5.14E+02
1.96E+03	5.13E+02
1.96E+03	5.13E+02
1.96E+03	5.13E+02
1.96E+03	5.12E+02
1.96E+03	5.12E+02
1.97E+03	5.13E+02
1.97E+03	5.13E+02
1.97E+03	5.15E+02
1.97E+03	5.13E+02
1.98E+03	5.11E+02
1.98E+03	5.14E+02
1.98E+03	5.16E+02
1.98E+03	5.13E+02
1.99E+03	5.16E+02
1.99E+03	5.14E+02
1.99E+03	5.12E+02
1.99E+03	5.12E+02
2.00E+03	5.12E+02
2.00E+03	5.13E+02
2.00E+03	5.14E+02
2.00E+03	5.14E+02
2.00E+03	5.12E+02
2.01E+03	5.13E+02
2.01E+03	5.15E+02
2.01E+03	5.15E+02
2.01E+03	5.15E+02
2.02E+03	5.12E+02
2.02E+03	5.14E+02
2.02E+03	5.12E+02
2.02E+03	5.13E+02
2.03E+03	5.13E+02
2.03E+03	5.15E+02
2.03E+03	5.14E+02
2.03E+03	5.13E+02
2.03E+03	5.13E+02
2.04E+03	5.14E+02
2.04E+03	5.12E+02
2.04E+03	5.14E+02
2.04E+03	5.13E+02
2.05E+03	5.14E+02
2.05E+03	5.13E+02
2.05E+03	5.13E+02
2.05E+03	5.14E+02
2.06E+03	5.13E+02
2.06E+03	5.12E+02
2.06E+03	5.13E+02
2.06E+03	5.13E+02
2.06E+03	5.13E+02
2.07E+03	5.13E+02
2.07E+03	5.10E+02
2.07E+03	5.12E+02
2.07E+03	5.11E+02
2.08E+03	5.11E+02
2.08E+03	5.12E+02
2.08E+03	5.12E+02
2.08E+03	5.13E+02
2.09E+03	5.13E+02
2.09E+03	5.14E+02
2.09E+03	5.12E+02
2.09E+03	5.13E+02
2.09E+03	5.14E+02
2.10E+03	5.12E+02
2.10E+03	5.12E+02
2.10E+03	5.12E+02
2.10E+03	5.13E+02
2.11E+03	5.12E+02
2.11E+03	5.13E+02
2.11E+03	5.13E+02
2.11E+03	5.13E+02
2.11E+03	5.13E+02
2.12E+03	5.13E+02
2.12E+03	5.12E+02
2.12E+03	5.13E+02
2.12E+03	5.13E+02
2.13E+03	5.15E+02
2.13E+03	5.14E+02
2.13E+03	5.12E+02
2.13E+03	5.12E+02
2.14E+03	5.13E+02
2.14E+03	5.12E+02
2.14E+03	5.12E+02
2.14E+03	5.13E+02
2.14E+03	5.12E+02
2.15E+03	5.13E+02
2.15E+03	5.13E+02
2.15E+03	5.11E+02
2.15E+03	5.14E+02
2.16E+03	5.13E+02
2.16E+03	5.13E+02
2.16E+03	5.13E+02
2.16E+03	5.11E+02
2.16E+03	5.12E+02
2.17E+03	5.11E+02
2.17E+03	5.12E+02
2.17E+03	5.13E+02
2.17E+03	5.11E+02
2.18E+03	5.11E+02
2.18E+03	5.12E+02
2.18E+03	5.13E+02
2.18E+03	5.13E+02
2.19E+03	5.12E+02
2.19E+03	5.12E+02
2.19E+03	5.11E+02
2.19E+03	5.10E+02
2.19E+03	5.14E+02
2.20E+03	5.14E+02
2.20E+03	5.15E+02
2.20E+03	5.13E+02
2.20E+03	5.11E+02
2.21E+03	5.13E+02
2.21E+03	5.13E+02
2.21E+03	5.13E+02
2.21E+03	5.16E+02
2.21E+03	5.12E+02
2.22E+03	5.12E+02
2.22E+03	5.14E+02
2.22E+03	5.14E+02
2.22E+03	5.13E+02
2.23E+03	5.14E+02
2.23E+03	5.12E+02
2.23E+03	5.13E+02
2.23E+03	5.13E+02
2.23E+03	5.14E+02
2.24E+03	5.15E+02
2.24E+03	5.13E+02
2.24E+03	5.12E+02
2.24E+03	5.13E+02
2.25E+03	5.13E+02
2.25E+03	5.10E+02
2.25E+03	5.11E+02
2.25E+03	5.12E+02
2.26E+03	5.14E+02
2.26E+03	5.14E+02
2.26E+03	5.13E+02
2.26E+03	5.11E+02
2.26E+03	5.13E+02
2.27E+03	5.10E+02
2.27E+03	5.13E+02
2.27E+03	5.12E+02
2.27E+03	5.13E+02
2.28E+03	5.13E+02
2.28E+03	5.12E+02
2.28E+03	5.13E+02
2.28E+03	5.13E+02
2.28E+03	5.12E+02
2.29E+03	5.12E+02
2.29E+03	5.15E+02
2.29E+03	5.13E+02
2.29E+03	5.14E+02
2.30E+03	5.12E+02
2.30E+03	5.13E+02
2.30E+03	5.13E+02
2.30E+03	5.14E+02
2.30E+03	5.13E+02
2.31E+03	5.13E+02
2.31E+03	5.14E+02
2.31E+03	5.13E+02
2.31E+03	5.13E+02
2.32E+03	5.16E+02
2.32E+03	5.15E+02
2.32E+03	5.15E+02
2.32E+03	5.13E+02
2.32E+03	5.16E+02
2.33E+03	5.14E+02
2.33E+03	5.14E+02
2.33E+03	5.16E+02
2.33E+03	5.14E+02
2.34E+03	5.14E+02
2.34E+03	5.15E+02
2.34E+03	5.15E+02
2.34E+03	5.14E+02
2.34E+03	5.14E+02
2.35E+03	5.16E+02
2.35E+03	5.15E+02
2.35E+03	5.15E+02
2.35E+03	5.14E+02
2.36E+03	5.14E+02
2.36E+03	5.15E+02
2.36E+03	5.15E+02
2.36E+03	5.16E+02
2.36E+03	5.15E+02
2.37E+03	5.16E+02
2.37E+03	5.16E+02
2.37E+03	5.14E+02
2.37E+03	5.16E+02
2.38E+03	5.14E+02
2.38E+03	5.16E+02
2.38E+03	5.15E+02
2.38E+03	5.15E+02
2.38E+03	5.16E+02
2.39E+03	5.17E+02
2.39E+03	5.15E+02
2.39E+03	5.15E+02
2.39E+03	5.15E+02
2.40E+03	5.16E+02
2.40E+03	5.15E+02
2.40E+03	5.18E+02
2.40E+03	5.17E+02
2.40E+03	5.16E+02
2.41E+03	5.19E+02
2.41E+03	5.16E+02
2.41E+03	5.18E+02
2.41E+03	5.16E+02
2.41E+03	5.18E+02
2.42E+03	5.17E+02
2.42E+03	5.16E+02
2.42E+03	5.19E+02
2.42E+03	5.19E+02
2.43E+03	5.22E+02
2.43E+03	5.19E+02
2.43E+03	5.22E+02
2.43E+03	5.26E+02
2.43E+03	5.26E+02
2.44E+03	5.30E+02
2.44E+03	5.30E+02
2.44E+03	5.29E+02
2.44E+03	5.29E+02
2.45E+03	5.30E+02
2.45E+03	5.30E+02
2.45E+03	5.29E+02
2.45E+03	5.28E+02
2.45E+03	5.30E+02
2.46E+03	5.29E+02
2.46E+03	5.29E+02
2.46E+03	5.28E+02
2.46E+03	5.28E+02
2.47E+03	5.27E+02
2.47E+03	5.26E+02
2.47E+03	5.28E+02
2.47E+03	5.26E+02
2.47E+03	5.27E+02
2.48E+03	5.26E+02
2.48E+03	5.27E+02
2.48E+03	5.25E+02
2.48E+03	5.25E+02
2.48E+03	5.24E+02
2.49E+03	5.24E+02
2.49E+03	5.23E+02
2.49E+03	5.23E+02
2.49E+03	5.23E+02
2.50E+03	5.23E+02
2.50E+03	5.23E+02
2.50E+03	5.23E+02
2.50E+03	5.24E+02
2.50E+03	5.23E+02
2.51E+03	5.21E+02
2.51E+03	5.23E+02
2.51E+03	5.23E+02
2.51E+03	5.24E+02
2.52E+03	5.24E+02
2.52E+03	5.22E+02
2.52E+03	5.24E+02
2.52E+03	5.23E+02
2.52E+03	5.22E+02
2.53E+03	5.24E+02
2.53E+03	5.25E+02
2.53E+03	5.23E+02
2.53E+03	5.25E+02
2.53E+03	5.23E+02
2.54E+03	5.23E+02
2.54E+03	5.22E+02
2.54E+03	5.25E+02
2.54E+03	5.24E+02
2.55E+03	5.25E+02
2.55E+03	5.23E+02
2.55E+03	5.27E+02
2.55E+03	5.24E+02
2.55E+03	5.26E+02
2.56E+03	5.26E+02
2.56E+03	5.26E+02
2.56E+03	5.25E+02
2.56E+03	5.26E+02
2.56E+03	5.28E+02
2.57E+03	5.27E+02
2.57E+03	5.27E+02
2.57E+03	5.27E+02
2.57E+03	5.26E+02
2.58E+03	5.27E+02
2.58E+03	5.28E+02
2.58E+03	5.30E+02
2.58E+03	5.28E+02
2.58E+03	5.28E+02
2.59E+03	5.28E+02
2.59E+03	5.32E+02
2.59E+03	5.33E+02
2.59E+03	5.33E+02
2.59E+03	5.33E+02
2.60E+03	5.34E+02
2.60E+03	5.32E+02
2.60E+03	5.33E+02
2.60E+03	5.32E+02
2.61E+03	5.34E+02
2.61E+03	5.35E+02
2.61E+03	5.37E+02
2.61E+03	5.36E+02
2.61E+03	5.37E+02
2.62E+03	5.39E+02
2.62E+03	5.39E+02
2.62E+03	5.41E+02
2.62E+03	5.40E+02
2.62E+03	5.43E+02
2.63E+03	5.43E+02
2.63E+03	5.44E+02
2.63E+03	5.45E+02
2.63E+03	5.48E+02
2.64E+03	5.49E+02
2.64E+03	5.49E+02
2.64E+03	5.50E+02
2.64E+03	5.54E+02
2.64E+03	5.59E+02
2.65E+03	5.61E+02
2.65E+03	5.67E+02
2.65E+03	5.69E+02
2.65E+03	5.73E+02
2.65E+03	5.80E+02
2.66E+03	5.83E+02
2.66E+03	5.89E+02
2.66E+03	5.92E+02
2.66E+03	5.96E+02
2.67E+03	6.04E+02
2.67E+03	6.09E+02
2.67E+03	6.16E+02
2.67E+03	6.15E+02
2.67E+03	6.20E+02
2.68E+03	6.19E+02
2.68E+03	6.24E+02
2.68E+03	6.30E+02
2.68E+03	6.30E+02
2.68E+03	6.30E+02
2.69E+03	6.32E+02
2.69E+03	6.32E+02
2.69E+03	6.36E+02
2.69E+03	6.38E+02
2.69E+03	6.46E+02
2.70E+03	6.51E+02
2.70E+03	6.58E+02
2.70E+03	6.72E+02
2.70E+03	6.81E+02
2.71E+03	6.94E+02
2.71E+03	7.09E+02
2.71E+03	7.24E+02
2.71E+03	7.40E+02
2.71E+03	7.52E+02
2.72E+03	7.64E+02
2.72E+03	7.66E+02
2.72E+03	7.66E+02
2.72E+03	7.60E+02
2.72E+03	7.45E+02
2.73E+03	7.28E+02
2.73E+03	7.11E+02
2.73E+03	6.95E+02
2.73E+03	6.84E+02
2.73E+03	6.70E+02
2.74E+03	6.58E+02
2.74E+03	6.50E+02
2.74E+03	6.41E+02
2.74E+03	6.33E+02
2.75E+03	6.19E+02
2.75E+03	6.09E+02
2.75E+03	6.00E+02
2.75E+03	5.91E+02
2.75E+03	5.86E+02
2.76E+03	5.78E+02
2.76E+03	5.77E+02
2.76E+03	5.69E+02
2.76E+03	5.65E+02
2.76E+03	5.62E+02
2.77E+03	5.63E+02
2.77E+03	5.59E+02
2.77E+03	5.55E+02
2.77E+03	5.55E+02
2.77E+03	5.52E+02
2.78E+03	5.54E+02
2.78E+03	5.52E+02
2.78E+03	5.49E+02
2.78E+03	5.52E+02
2.79E+03	5.54E+02
2.79E+03	5.50E+02
2.79E+03	5.51E+02
2.79E+03	5.47E+02
2.79E+03	5.47E+02
2.80E+03	5.47E+02
2.80E+03	5.46E+02
2.80E+03	5.46E+02
2.80E+03	5.45E+02
2.80E+03	5.45E+02
2.81E+03	5.44E+02
2.81E+03	5.46E+02
2.81E+03	5.45E+02
2.81E+03	5.45E+02
2.81E+03	5.44E+02
2.82E+03	5.43E+02
2.82E+03	5.43E+02
2.82E+03	5.42E+02
2.82E+03	5.45E+02
2.82E+03	5.43E+02
2.83E+03	5.43E+02
2.83E+03	5.45E+02
2.83E+03	5.45E+02
2.83E+03	5.44E+02
2.84E+03	5.43E+02
2.84E+03	5.46E+02
2.84E+03	5.44E+02
2.84E+03	5.44E+02
2.84E+03	5.47E+02
2.85E+03	5.48E+02
2.85E+03	5.47E+02
2.85E+03	5.46E+02
2.85E+03	5.46E+02
2.85E+03	5.47E+02
2.86E+03	5.46E+02
2.86E+03	5.49E+02
2.86E+03	5.46E+02
2.86E+03	5.47E+02
2.86E+03	5.49E+02
2.87E+03	5.49E+02
2.87E+03	5.50E+02
2.87E+03	5.50E+02
2.87E+03	5.51E+02
2.87E+03	5.50E+02
2.88E+03	5.49E+02
2.88E+03	5.49E+02
2.88E+03	5.50E+02
2.88E+03	5.47E+02
2.88E+03	5.49E+02
2.89E+03	5.50E+02
2.89E+03	5.50E+02
2.89E+03	5.52E+02
2.89E+03	5.50E+02
2.89E+03	5.50E+02
2.90E+03	5.48E+02
2.90E+03	5.54E+02
2.90E+03	5.51E+02
2.90E+03	5.55E+02
2.91E+03	5.53E+02
2.91E+03	5.53E+02
2.91E+03	5.52E+02
2.91E+03	5.49E+02
2.91E+03	5.53E+02
2.92E+03	5.53E+02
2.92E+03	5.52E+02
2.92E+03	5.54E+02
2.92E+03	5.52E+02
2.92E+03	5.53E+02
2.93E+03	5.53E+02
2.93E+03	5.50E+02
2.93E+03	5.53E+02
2.93E+03	5.52E+02
2.93E+03	5.54E+02
2.94E+03	5.52E+02
2.94E+03	5.51E+02
2.94E+03	5.55E+02
2.94E+03	5.56E+02
2.94E+03	5.53E+02
2.95E+03	5.50E+02
2.95E+03	5.52E+02
2.95E+03	5.53E+02
2.95E+03	5.55E+02
2.95E+03	5.54E+02
2.96E+03	5.53E+02
2.96E+03	5.52E+02
2.96E+03	5.52E+02
2.96E+03	5.54E+02
2.96E+03	5.54E+02
2.97E+03	5.55E+02
2.97E+03	5.56E+02
2.97E+03	5.56E+02
2.97E+03	5.56E+02
2.97E+03	5.54E+02
2.98E+03	5.53E+02
2.98E+03	5.50E+02
2.98E+03	5.53E+02
2.98E+03	5.52E+02
2.98E+03	5.53E+02
2.99E+03	5.52E+02
2.99E+03	5.53E+02
2.99E+03	5.53E+02
2.99E+03	5.52E+02
2.99E+03	5.53E+02
3.00E+03	5.53E+02
3.00E+03	5.51E+02
3.00E+03	5.54E+02
3.00E+03	5.54E+02
3.01E+03	5.54E+02
3.01E+03	5.52E+02
3.01E+03	5.52E+02
3.01E+03	5.51E+02
3.01E+03	5.55E+02
3.02E+03	5.52E+02
3.02E+03	5.51E+02
3.02E+03	5.53E+02
3.02E+03	5.53E+02
3.02E+03	5.53E+02
3.03E+03	5.53E+02
3.03E+03	5.53E+02
3.03E+03	5.56E+02
3.03E+03	5.56E+02
3.03E+03	5.56E+02
3.04E+03	5.56E+02
3.04E+03	5.54E+02
3.04E+03	5.53E+02
3.04E+03	5.56E+02
3.04E+03	5.55E+02
3.05E+03	5.56E+02
3.05E+03	5.58E+02
3.05E+03	5.57E+02
3.05E+03	5.57E+02
3.05E+03	5.55E+02
3.06E+03	5.57E+02
3.06E+03	5.59E+02
3.06E+03	5.60E+02
3.06E+03	5.57E+02
3.06E+03	5.60E+02
3.07E+03	5.58E+02
3.07E+03	5.60E+02
3.07E+03	5.61E+02
3.07E+03	5.61E+02
3.07E+03	5.59E+02
3.08E+03	5.58E+02
3.08E+03	5.61E+02
3.08E+03	5.58E+02
3.08E+03	5.60E+02
3.08E+03	5.61E+02
3.09E+03	5.62E+02
3.09E+03	5.61E+02
3.09E+03	5.60E+02
3.09E+03	5.61E+02
3.09E+03	5.62E+02
3.10E+03	5.61E+02
3.10E+03	5.62E+02
3.10E+03	5.63E+02
3.10E+03	5.66E+02
3.10E+03	5.64E+02
3.11E+03	5.61E+02
3.11E+03	5.61E+02
3.11E+03	5.62E+02
3.11E+03	5.62E+02
3.11E+03	5.61E+02
3.12E+03	5.64E+02
3.12E+03	5.64E+02
3.12E+03	5.63E+02
3.12E+03	5.65E+02
3.12E+03	5.64E+02
3.13E+03	5.65E+02
3.13E+03	5.65E+02
3.13E+03	5.65E+02
3.13E+03	5.65E+02
3.13E+03	5.64E+02
3.14E+03	5.66E+02
3.14E+03	5.64E+02
3.14E+03	5.67E+02
3.14E+03	5.64E+02
3.14E+03	5.66E+02
3.15E+03	5.68E+02
3.15E+03	5.67E+02
3.15E+03	5.68E+02
3.15E+03	5.67E+02
3.15E+03	5.69E+02
3.16E+03	5.70E+02
3.16E+03	5.65E+02
3.16E+03	5.67E+02
3.16E+03	5.68E+02
3.16E+03	5.69E+02
3.17E+03	5.70E+02
3.17E+03	5.69E+02
3.17E+03	5.68E+02
3.17E+03	5.72E+02
3.17E+03	5.73E+02
3.18E+03	5.74E+02
3.18E+03	5.71E+02
3.18E+03	5.73E+02
3.18E+03	5.74E+02
3.18E+03	5.73E+02
3.19E+03	5.71E+02
3.19E+03	5.72E+02
3.19E+03	5.73E+02
3.19E+03	5.75E+02
3.19E+03	5.72E+02
3.19E+03	5.72E+02
3.20E+03	5.73E+02
3.20E+03	5.72E+02
3.20E+03	5.74E+02
3.20E+03	5.73E+02
3.20E+03	5.75E+02
3.21E+03	5.74E+02
3.21E+03	5.78E+02
3.21E+03	5.72E+02
3.21E+03	5.76E+02
3.21E+03	5.76E+02
3.22E+03	5.79E+02
3.22E+03	5.76E+02
3.22E+03	5.78E+02
3.22E+03	5.80E+02
3.22E+03	5.79E+02
3.23E+03	5.82E+02
3.23E+03	5.82E+02
3.23E+03	5.86E+02
3.23E+03	5.88E+02
3.23E+03	5.91E+02
3.24E+03	5.98E+02
3.24E+03	6.03E+02
3.24E+03	6.05E+02
3.24E+03	6.08E+02
3.24E+03	6.12E+02
3.25E+03	6.11E+02
3.25E+03	6.12E+02
3.25E+03	6.04E+02
3.25E+03	5.99E+02
3.25E+03	5.90E+02
3.26E+03	5.91E+02
3.26E+03	5.88E+02
3.26E+03	5.86E+02
3.26E+03	5.83E+02
3.26E+03	5.85E+02
3.27E+03	5.84E+02
3.27E+03	5.84E+02
3.27E+03	5.85E+02
3.27E+03	5.86E+02
3.27E+03	5.85E+02
3.28E+03	5.87E+02
3.28E+03	5.86E+02
3.28E+03	5.86E+02
3.28E+03	5.84E+02
3.28E+03	5.87E+02
3.29E+03	5.88E+02
3.29E+03	5.84E+02
3.29E+03	5.86E+02
3.29E+03	5.85E+02
3.29E+03	5.86E+02
3.29E+03	5.88E+02
3.30E+03	5.89E+02
3.30E+03	5.89E+02
3.30E+03	5.89E+02
3.30E+03	5.89E+02
3.30E+03	5.92E+02
3.31E+03	5.90E+02
3.31E+03	5.88E+02
3.31E+03	5.89E+02
3.31E+03	5.90E+02
3.31E+03	5.89E+02
3.32E+03	5.89E+02
3.32E+03	5.90E+02
3.32E+03	5.91E+02
3.32E+03	5.91E+02
3.32E+03	5.90E+02
3.33E+03	5.92E+02
3.33E+03	5.91E+02
3.33E+03	5.94E+02
3.33E+03	5.96E+02
3.33E+03	5.96E+02
3.34E+03	5.92E+02
3.34E+03	5.99E+02
3.34E+03	5.97E+02
3.34E+03	5.95E+02
3.34E+03	6.00E+02
3.35E+03	5.91E+02
3.35E+03	5.98E+02
3.35E+03	6.00E+02
3.35E+03	5.99E+02
3.35E+03	5.97E+02
3.35E+03	6.00E+02
3.36E+03	5.97E+02
3.36E+03	6.01E+02
3.36E+03	6.00E+02
3.36E+03	6.05E+02
3.36E+03	6.05E+02
3.37E+03	6.08E+02
3.37E+03	6.05E+02
3.37E+03	6.06E+02
3.37E+03	6.06E+02
3.37E+03	6.04E+02
3.38E+03	6.04E+02
3.38E+03	6.02E+02
3.38E+03	6.02E+02
3.38E+03	6.05E+02
3.38E+03	6.05E+02
3.39E+03	6.08E+02
3.39E+03	6.11E+02
3.39E+03	6.08E+02
3.39E+03	6.10E+02
3.39E+03	6.12E+02
3.40E+03	6.10E+02
3.40E+03	6.12E+02
3.40E+03	6.13E+02
3.40E+03	6.10E+02
3.40E+03	6.11E+02
3.40E+03	6.14E+02
3.41E+03	6.18E+02
3.41E+03	6.13E+02
3.41E+03	6.14E+02
3.41E+03	6.16E+02
3.41E+03	6.18E+02
3.42E+03	6.17E+02
3.42E+03	6.14E+02
3.42E+03	6.14E+02
3.42E+03	6.15E+02
3.42E+03	6.17E+02
3.43E+03	6.17E+02
3.43E+03	6.20E+02
3.43E+03	6.19E+02
3.43E+03	6.15E+02
3.43E+03	6.19E+02
3.44E+03	6.20E+02
3.44E+03	6.16E+02
3.44E+03	6.17E+02
3.44E+03	6.22E+02
3.44E+03	6.24E+02
3.44E+03	6.25E+02
3.45E+03	6.21E+02
3.45E+03	6.20E+02
3.45E+03	6.23E+02
3.45E+03	6.26E+02
3.45E+03	6.27E+02
3.46E+03	6.23E+02
3.46E+03	6.21E+02
3.46E+03	6.25E+02
3.46E+03	6.25E+02
3.46E+03	6.27E+02
3.47E+03	6.25E+02
3.47E+03	6.24E+02
3.47E+03	6.27E+02
3.47E+03	6.28E+02
3.47E+03	6.32E+02
3.48E+03	6.31E+02
3.48E+03	6.30E+02
3.48E+03	6.31E+02
3.48E+03	6.33E+02
3.48E+03	6.33E+02
3.48E+03	6.33E+02
3.49E+03	6.30E+02
3.49E+03	6.33E+02
3.49E+03	6.30E+02
3.49E+03	6.38E+02
3.49E+03	6.33E+02
3.50E+03	6.37E+02
3.50E+03	6.37E+02
3.50E+03	6.38E+02
3.50E+03	6.33E+02
3.50E+03	6.38E+02
3.51E+03	6.36E+02
3.51E+03	6.38E+02
3.51E+03	6.41E+02
3.51E+03	6.42E+02
3.51E+03	6.40E+02
3.51E+03	6.38E+02
3.52E+03	6.42E+02
3.52E+03	6.40E+02
3.52E+03	6.42E+02
3.52E+03	6.42E+02
3.52E+03	6.40E+02
3.53E+03	6.42E+02
3.53E+03	6.42E+02
3.53E+03	6.39E+02
3.53E+03	6.40E+02
3.53E+03	6.40E+02
3.54E+03	6.44E+02
3.54E+03	6.45E+02
3.54E+03	6.46E+02
3.54E+03	6.43E+02
3.54E+03	6.44E+02
3.54E+03	6.45E+02
3.55E+03	6.43E+02
3.55E+03	6.44E+02
3.55E+03	6.49E+02
3.55E+03	6.46E+02
3.55E+03	6.48E+02
3.56E+03	6.48E+02
3.56E+03	6.49E+02
3.56E+03	6.46E+02
3.56E+03	6.46E+02
3.56E+03	6.46E+02
3.57E+03	6.48E+02
3.57E+03	6.47E+02
3.57E+03	6.51E+02
3.57E+03	6.47E+02
3.57E+03	6.49E+02
3.57E+03	6.49E+02
3.58E+03	6.49E+02
3.58E+03	6.55E+02
3.58E+03	6.49E+02
3.58E+03	6.52E+02
3.58E+03	6.51E+02
3.59E+03	6.53E+02
3.59E+03	6.50E+02
3.59E+03	6.52E+02
3.59E+03	6.53E+02
3.59E+03	6.54E+02
3.60E+03	6.50E+02
3.60E+03	6.52E+02
3.60E+03	6.51E+02
3.60E+03	6.54E+02
3.60E+03	6.55E+02
3.60E+03	6.50E+02
3.61E+03	6.58E+02
3.61E+03	6.59E+02
3.61E+03	6.58E+02
3.61E+03	6.52E+02
3.61E+03	6.59E+02
3.62E+03	6.55E+02
3.62E+03	6.60E+02
3.62E+03	6.60E+02
3.62E+03	6.60E+02
3.62E+03	6.63E+02
3.62E+03	6.62E+02
3.63E+03	6.60E+02
3.63E+03	6.59E+02
3.63E+03	6.62E+02
3.63E+03	6.64E+02
3.63E+03	6.63E+02
3.64E+03	6.66E+02
3.64E+03	6.66E+02
3.64E+03	6.69E+02
3.64E+03	6.69E+02
3.64E+03	6.65E+02
3.65E+03	6.72E+02
3.65E+03	6.71E+02
3.65E+03	6.72E+02
3.65E+03	6.75E+02
3.65E+03	6.71E+02
3.65E+03	6.73E+02
3.66E+03	6.74E+02
3.66E+03	6.79E+02
3.66E+03	6.75E+02
3.66E+03	6.73E+02
3.66E+03	6.77E+02
3.67E+03	6.78E+02
3.67E+03	6.83E+02
3.67E+03	6.78E+02
3.67E+03	6.80E+02
3.67E+03	6.80E+02
3.67E+03	6.79E+02
3.68E+03	6.78E+02
3.68E+03	6.82E+02
3.68E+03	6.81E+02
3.68E+03	6.82E+02
3.68E+03	6.83E+02
3.69E+03	6.86E+02
3.69E+03	6.82E+02
3.69E+03	6.82E+02
3.69E+03	6.90E+02
3.69E+03	6.85E+02
3.69E+03	6.87E+02
3.70E+03	6.88E+02
3.70E+03	6.94E+02
3.70E+03	6.94E+02
3.70E+03	6.92E+02
3.70E+03	6.91E+02
3.71E+03	6.93E+02
3.71E+03	6.92E+02
3.71E+03	6.97E+02
3.71E+03	6.94E+02
3.71E+03	6.99E+02
3.72E+03	6.96E+02
3.72E+03	6.96E+02
3.72E+03	6.99E+02
3.72E+03	7.02E+02
3.72E+03	7.04E+02
3.72E+03	7.04E+02
3.73E+03	7.07E+02
3.73E+03	7.05E+02
3.73E+03	7.01E+02
3.73E+03	7.06E+02
3.73E+03	7.09E+02
3.74E+03	7.12E+02
3.74E+03	7.05E+02
3.74E+03	7.07E+02
3.74E+03	7.06E+02
3.74E+03	7.08E+02
3.74E+03	7.10E+02
3.75E+03	7.16E+02
3.75E+03	7.18E+02
3.75E+03	7.20E+02
3.75E+03	7.18E+02
3.75E+03	7.22E+02
3.76E+03	7.21E+02
3.76E+03	7.25E+02
3.76E+03	7.21E+02
3.76E+03	7.23E+02
3.76E+03	7.18E+02
3.76E+03	7.23E+02
3.77E+03	7.26E+02
3.77E+03	7.24E+02
3.77E+03	7.33E+02
3.77E+03	7.28E+02
3.77E+03	7.35E+02
3.78E+03	7.36E+02
3.78E+03	7.38E+02
3.78E+03	7.32E+02
3.78E+03	7.39E+02
3.78E+03	7.39E+02
3.78E+03	7.43E+02
3.79E+03	7.40E+02
3.79E+03	7.40E+02
3.79E+03	7.41E+02
3.79E+03	7.44E+02
3.79E+03	7.42E+02
3.80E+03	7.40E+02
3.80E+03	7.42E+02
3.80E+03	7.45E+02
3.80E+03	7.50E+02
3.80E+03	7.58E+02
3.80E+03	7.55E+02
3.81E+03	7.55E+02
3.81E+03	7.56E+02
3.81E+03	7.58E+02
3.81E+03	7.56E+02
3.81E+03	7.57E+02
3.81E+03	7.51E+02
3.82E+03	7.56E+02
3.82E+03	7.63E+02
3.82E+03	7.61E+02
3.82E+03	7.65E+02
3.82E+03	7.62E+02
3.83E+03	7.58E+02
3.83E+03	7.67E+02
3.83E+03	7.70E+02
3.83E+03	7.72E+02
3.83E+03	7.73E+02
3.83E+03	7.72E+02
3.84E+03	7.74E+02
3.84E+03	7.78E+02
3.84E+03	7.79E+02
3.84E+03	7.75E+02
3.84E+03	7.77E+02
3.85E+03	7.77E+02
3.85E+03	7.81E+02
3.85E+03	7.86E+02
3.85E+03	7.84E+02
3.85E+03	7.78E+02
3.85E+03	7.78E+02
3.86E+03	7.84E+02
3.86E+03	7.89E+02
3.86E+03	7.92E+02
3.86E+03	8.00E+02
3.86E+03	7.95E+02
3.87E+03	7.98E+02

## Sheet: 10029 3L
rel. 1/cm	CCD cts
9.47E+01	7.26E+02
9.76E+01	7.34E+02
1.00E+02	7.37E+02
1.03E+02	7.36E+02
1.06E+02	7.42E+02
1.09E+02	7.31E+02
1.12E+02	7.31E+02
1.15E+02	7.35E+02
1.18E+02	7.36E+02
1.21E+02	7.28E+02
1.24E+02	7.34E+02
1.27E+02	7.33E+02
1.30E+02	7.35E+02
1.32E+02	7.40E+02
1.35E+02	7.36E+02
1.38E+02	7.39E+02
1.41E+02	7.32E+02
1.44E+02	7.37E+02
1.47E+02	7.39E+02
1.50E+02	7.40E+02
1.53E+02	7.37E+02
1.56E+02	7.33E+02
1.59E+02	7.31E+02
1.61E+02	7.43E+02
1.64E+02	7.38E+02
1.67E+02	7.32E+02
1.70E+02	7.29E+02
1.73E+02	7.34E+02
1.76E+02	7.33E+02
1.79E+02	7.38E+02
1.82E+02	7.33E+02
1.85E+02	7.36E+02
1.87E+02	7.46E+02
1.90E+02	7.28E+02
1.93E+02	7.30E+02
1.96E+02	7.33E+02
1.99E+02	7.41E+02
2.02E+02	7.41E+02
2.05E+02	7.36E+02
2.08E+02	7.36E+02
2.10E+02	7.37E+02
2.13E+02	7.36E+02
2.16E+02	7.27E+02
2.19E+02	7.38E+02
2.22E+02	7.45E+02
2.25E+02	7.37E+02
2.28E+02	7.47E+02
2.31E+02	7.54E+02
2.33E+02	7.50E+02
2.36E+02	7.46E+02
2.39E+02	7.46E+02
2.42E+02	7.47E+02
2.45E+02	7.48E+02
2.48E+02	7.44E+02
2.51E+02	7.48E+02
2.53E+02	7.44E+02
2.56E+02	7.44E+02
2.59E+02	7.42E+02
2.62E+02	7.39E+02
2.65E+02	7.43E+02
2.68E+02	7.41E+02
2.71E+02	7.46E+02
2.73E+02	7.50E+02
2.76E+02	7.49E+02
2.79E+02	7.48E+02
2.82E+02	7.53E+02
2.85E+02	7.53E+02
2.88E+02	7.50E+02
2.91E+02	7.56E+02
2.93E+02	7.54E+02
2.96E+02	7.47E+02
2.99E+02	7.42E+02
3.02E+02	7.47E+02
3.05E+02	7.53E+02
3.08E+02	7.52E+02
3.10E+02	7.47E+02
3.13E+02	7.51E+02
3.16E+02	7.52E+02
3.19E+02	7.52E+02
3.22E+02	7.64E+02
3.25E+02	7.55E+02
3.28E+02	7.61E+02
3.30E+02	7.53E+02
3.33E+02	7.50E+02
3.36E+02	7.55E+02
3.39E+02	7.60E+02
3.42E+02	7.61E+02
3.45E+02	7.61E+02
3.47E+02	7.60E+02
3.50E+02	7.52E+02
3.53E+02	7.59E+02
3.56E+02	7.58E+02
3.59E+02	7.66E+02
3.62E+02	7.72E+02
3.64E+02	7.59E+02
3.67E+02	7.55E+02
3.70E+02	7.66E+02
3.73E+02	7.72E+02
3.76E+02	7.58E+02
3.78E+02	7.53E+02
3.81E+02	7.62E+02
3.84E+02	7.61E+02
3.87E+02	7.60E+02
3.90E+02	7.57E+02
3.93E+02	7.62E+02
3.95E+02	7.57E+02
3.98E+02	7.62E+02
4.01E+02	7.58E+02
4.04E+02	7.60E+02
4.07E+02	7.60E+02
4.09E+02	7.58E+02
4.12E+02	7.62E+02
4.15E+02	7.60E+02
4.18E+02	7.64E+02
4.21E+02	7.64E+02
4.23E+02	7.64E+02
4.26E+02	7.58E+02
4.29E+02	7.60E+02
4.32E+02	7.55E+02
4.35E+02	7.58E+02
4.37E+02	7.63E+02
4.40E+02	7.58E+02
4.43E+02	7.50E+02
4.46E+02	7.62E+02
4.49E+02	7.68E+02
4.51E+02	7.67E+02
4.54E+02	7.62E+02
4.57E+02	7.60E+02
4.60E+02	7.60E+02
4.63E+02	7.62E+02
4.65E+02	7.60E+02
4.68E+02	7.69E+02
4.71E+02	7.62E+02
4.74E+02	7.69E+02
4.77E+02	7.67E+02
4.79E+02	7.73E+02
4.82E+02	7.65E+02
4.85E+02	7.66E+02
4.88E+02	7.72E+02
4.91E+02	7.68E+02
4.93E+02	7.70E+02
4.96E+02	7.76E+02
4.99E+02	7.81E+02
5.02E+02	7.68E+02
5.04E+02	7.55E+02
5.07E+02	7.65E+02
5.10E+02	7.60E+02
5.13E+02	7.63E+02
5.16E+02	7.59E+02
5.18E+02	7.56E+02
5.21E+02	7.69E+02
5.24E+02	7.66E+02
5.27E+02	7.62E+02
5.29E+02	7.65E+02
5.32E+02	7.64E+02
5.35E+02	7.65E+02
5.38E+02	7.68E+02
5.41E+02	7.76E+02
5.43E+02	7.54E+02
5.46E+02	7.56E+02
5.49E+02	7.64E+02
5.52E+02	7.67E+02
5.54E+02	7.66E+02
5.57E+02	7.76E+02
5.60E+02	7.73E+02
5.63E+02	7.75E+02
5.65E+02	7.77E+02
5.68E+02	7.76E+02
5.71E+02	7.69E+02
5.74E+02	7.70E+02
5.76E+02	7.67E+02
5.79E+02	7.79E+02
5.82E+02	7.76E+02
5.85E+02	7.67E+02
5.87E+02	7.65E+02
5.90E+02	7.69E+02
5.93E+02	7.69E+02
5.96E+02	7.77E+02
5.98E+02	7.73E+02
6.01E+02	7.67E+02
6.04E+02	7.72E+02
6.07E+02	7.81E+02
6.09E+02	7.80E+02
6.12E+02	7.72E+02
6.15E+02	7.62E+02
6.18E+02	7.72E+02
6.20E+02	7.79E+02
6.23E+02	7.68E+02
6.26E+02	7.70E+02
6.29E+02	7.75E+02
6.31E+02	7.79E+02
6.34E+02	7.74E+02
6.37E+02	7.73E+02
6.40E+02	7.74E+02
6.42E+02	7.64E+02
6.45E+02	7.76E+02
6.48E+02	7.71E+02
6.51E+02	7.80E+02
6.53E+02	7.84E+02
6.56E+02	7.86E+02
6.59E+02	7.78E+02
6.61E+02	7.74E+02
6.64E+02	7.73E+02
6.67E+02	7.86E+02
6.70E+02	7.84E+02
6.72E+02	7.83E+02
6.75E+02	7.86E+02
6.78E+02	7.83E+02
6.81E+02	7.86E+02
6.83E+02	7.85E+02
6.86E+02	7.83E+02
6.89E+02	7.87E+02
6.91E+02	7.81E+02
6.94E+02	7.78E+02
6.97E+02	7.85E+02
7.00E+02	7.79E+02
7.02E+02	7.89E+02
7.05E+02	7.81E+02
7.08E+02	7.76E+02
7.10E+02	7.78E+02
7.13E+02	7.84E+02
7.16E+02	7.94E+02
7.19E+02	7.88E+02
7.21E+02	7.86E+02
7.24E+02	7.94E+02
7.27E+02	7.94E+02
7.29E+02	7.84E+02
7.32E+02	7.80E+02
7.35E+02	7.84E+02
7.38E+02	7.97E+02
7.40E+02	7.91E+02
7.43E+02	7.92E+02
7.46E+02	7.78E+02
7.48E+02	7.89E+02
7.51E+02	7.86E+02
7.54E+02	7.87E+02
7.57E+02	7.90E+02
7.59E+02	7.99E+02
7.62E+02	7.87E+02
7.65E+02	7.84E+02
7.67E+02	7.89E+02
7.70E+02	7.85E+02
7.73E+02	7.86E+02
7.75E+02	7.86E+02
7.78E+02	7.93E+02
7.81E+02	7.81E+02
7.83E+02	7.88E+02
7.86E+02	8.00E+02
7.89E+02	7.99E+02
7.92E+02	7.94E+02
7.94E+02	7.86E+02
7.97E+02	7.94E+02
8.00E+02	7.96E+02
8.02E+02	7.96E+02
8.05E+02	8.01E+02
8.08E+02	8.00E+02
8.10E+02	8.04E+02
8.13E+02	8.05E+02
8.16E+02	8.04E+02
8.18E+02	7.99E+02
8.21E+02	7.94E+02
8.24E+02	8.02E+02
8.26E+02	8.08E+02
8.29E+02	8.07E+02
8.32E+02	8.00E+02
8.34E+02	8.04E+02
8.37E+02	7.92E+02
8.40E+02	7.93E+02
8.42E+02	7.90E+02
8.45E+02	7.96E+02
8.48E+02	7.94E+02
8.50E+02	8.07E+02
8.53E+02	8.05E+02
8.56E+02	8.04E+02
8.58E+02	8.14E+02
8.61E+02	7.98E+02
8.64E+02	8.06E+02
8.66E+02	8.01E+02
8.69E+02	7.99E+02
8.72E+02	8.09E+02
8.74E+02	8.05E+02
8.77E+02	8.13E+02
8.80E+02	8.10E+02
8.82E+02	8.01E+02
8.85E+02	8.08E+02
8.88E+02	8.08E+02
8.90E+02	8.04E+02
8.93E+02	8.13E+02
8.96E+02	8.22E+02
8.98E+02	8.30E+02
9.01E+02	8.23E+02
9.04E+02	8.26E+02
9.06E+02	8.15E+02
9.09E+02	8.29E+02
9.12E+02	8.43E+02
9.14E+02	8.34E+02
9.17E+02	8.49E+02
9.20E+02	8.54E+02
9.22E+02	8.54E+02
9.25E+02	8.51E+02
9.28E+02	8.45E+02
9.30E+02	8.28E+02
9.33E+02	8.27E+02
9.35E+02	8.12E+02
9.38E+02	8.14E+02
9.41E+02	8.21E+02
9.43E+02	8.10E+02
9.46E+02	8.22E+02
9.49E+02	8.24E+02
9.51E+02	8.24E+02
9.54E+02	8.24E+02
9.57E+02	8.15E+02
9.59E+02	8.21E+02
9.62E+02	8.12E+02
9.65E+02	8.13E+02
9.67E+02	8.21E+02
9.70E+02	8.31E+02
9.72E+02	8.26E+02
9.75E+02	8.26E+02
9.78E+02	8.22E+02
9.80E+02	8.24E+02
9.83E+02	8.10E+02
9.86E+02	8.16E+02
9.88E+02	8.22E+02
9.91E+02	8.29E+02
9.93E+02	8.24E+02
9.96E+02	8.19E+02
9.99E+02	8.19E+02
1.00E+03	8.23E+02
1.00E+03	8.27E+02
1.01E+03	8.30E+02
1.01E+03	8.26E+02
1.01E+03	8.26E+02
1.01E+03	8.30E+02
1.02E+03	8.36E+02
1.02E+03	8.40E+02
1.02E+03	8.34E+02
1.02E+03	8.33E+02
1.03E+03	8.36E+02
1.03E+03	8.30E+02
1.03E+03	8.38E+02
1.04E+03	8.26E+02
1.04E+03	8.27E+02
1.04E+03	8.29E+02
1.04E+03	8.27E+02
1.05E+03	8.34E+02
1.05E+03	8.36E+02
1.05E+03	8.35E+02
1.05E+03	8.29E+02
1.06E+03	8.31E+02
1.06E+03	8.28E+02
1.06E+03	8.34E+02
1.06E+03	8.34E+02
1.07E+03	8.44E+02
1.07E+03	8.40E+02
1.07E+03	8.35E+02
1.07E+03	8.37E+02
1.08E+03	8.42E+02
1.08E+03	8.43E+02
1.08E+03	8.42E+02
1.08E+03	8.44E+02
1.09E+03	8.38E+02
1.09E+03	8.41E+02
1.09E+03	8.36E+02
1.10E+03	8.54E+02
1.10E+03	8.51E+02
1.10E+03	8.45E+02
1.10E+03	8.45E+02
1.11E+03	8.48E+02
1.11E+03	8.41E+02
1.11E+03	8.43E+02
1.11E+03	8.46E+02
1.12E+03	8.31E+02
1.12E+03	8.46E+02
1.12E+03	8.57E+02
1.12E+03	8.55E+02
1.13E+03	8.57E+02
1.13E+03	8.58E+02
1.13E+03	8.40E+02
1.13E+03	8.40E+02
1.14E+03	8.35E+02
1.14E+03	8.39E+02
1.14E+03	8.39E+02
1.14E+03	8.40E+02
1.15E+03	8.43E+02
1.15E+03	8.32E+02
1.15E+03	8.47E+02
1.15E+03	8.42E+02
1.16E+03	8.46E+02
1.16E+03	8.42E+02
1.16E+03	8.40E+02
1.16E+03	8.45E+02
1.17E+03	8.52E+02
1.17E+03	8.43E+02
1.17E+03	8.38E+02
1.18E+03	8.44E+02
1.18E+03	8.36E+02
1.18E+03	8.28E+02
1.18E+03	8.44E+02
1.19E+03	8.55E+02
1.19E+03	8.50E+02
1.19E+03	8.50E+02
1.19E+03	8.50E+02
1.20E+03	8.49E+02
1.20E+03	8.48E+02
1.20E+03	8.43E+02
1.20E+03	8.51E+02
1.21E+03	8.43E+02
1.21E+03	8.39E+02
1.21E+03	8.63E+02
1.21E+03	8.55E+02
1.22E+03	8.50E+02
1.22E+03	8.40E+02
1.22E+03	8.44E+02
1.22E+03	8.53E+02
1.23E+03	8.59E+02
1.23E+03	8.47E+02
1.23E+03	8.52E+02
1.23E+03	8.61E+02
1.24E+03	8.54E+02
1.24E+03	8.54E+02
1.24E+03	8.56E+02
1.24E+03	8.55E+02
1.25E+03	8.59E+02
1.25E+03	8.60E+02
1.25E+03	8.54E+02
1.25E+03	8.48E+02
1.26E+03	8.50E+02
1.26E+03	8.58E+02
1.26E+03	8.61E+02
1.26E+03	8.55E+02
1.27E+03	8.51E+02
1.27E+03	8.46E+02
1.27E+03	8.51E+02
1.27E+03	8.58E+02
1.28E+03	8.69E+02
1.28E+03	8.59E+02
1.28E+03	8.56E+02
1.28E+03	8.52E+02
1.29E+03	8.57E+02
1.29E+03	8.57E+02
1.29E+03	8.49E+02
1.30E+03	8.54E+02
1.30E+03	8.55E+02
1.30E+03	8.65E+02
1.30E+03	8.67E+02
1.31E+03	8.79E+02
1.31E+03	8.81E+02
1.31E+03	8.77E+02
1.31E+03	8.81E+02
1.32E+03	8.80E+02
1.32E+03	8.87E+02
1.32E+03	9.00E+02
1.32E+03	8.96E+02
1.33E+03	9.06E+02
1.33E+03	9.29E+02
1.33E+03	9.47E+02
1.33E+03	9.57E+02
1.34E+03	9.62E+02
1.34E+03	9.67E+02
1.34E+03	9.77E+02
1.34E+03	9.77E+02
1.35E+03	9.82E+02
1.35E+03	9.72E+02
1.35E+03	9.83E+02
1.35E+03	9.83E+02
1.36E+03	9.78E+02
1.36E+03	9.73E+02
1.36E+03	9.65E+02
1.36E+03	9.71E+02
1.37E+03	9.59E+02
1.37E+03	9.26E+02
1.37E+03	9.15E+02
1.37E+03	9.04E+02
1.38E+03	8.97E+02
1.38E+03	8.93E+02
1.38E+03	8.81E+02
1.38E+03	8.70E+02
1.39E+03	8.64E+02
1.39E+03	8.79E+02
1.39E+03	8.70E+02
1.39E+03	8.63E+02
1.40E+03	8.61E+02
1.40E+03	8.59E+02
1.40E+03	8.55E+02
1.40E+03	8.55E+02
1.41E+03	8.58E+02
1.41E+03	8.55E+02
1.41E+03	8.58E+02
1.41E+03	8.56E+02
1.42E+03	8.53E+02
1.42E+03	8.47E+02
1.42E+03	8.57E+02
1.42E+03	8.59E+02
1.43E+03	8.59E+02
1.43E+03	8.49E+02
1.43E+03	8.48E+02
1.43E+03	8.45E+02
1.44E+03	8.59E+02
1.44E+03	8.67E+02
1.44E+03	8.64E+02
1.44E+03	8.54E+02
1.45E+03	8.55E+02
1.45E+03	8.52E+02
1.45E+03	8.39E+02
1.45E+03	8.46E+02
1.46E+03	8.53E+02
1.46E+03	8.61E+02
1.46E+03	8.55E+02
1.46E+03	8.56E+02
1.47E+03	8.56E+02
1.47E+03	8.59E+02
1.47E+03	8.56E+02
1.47E+03	8.56E+02
1.48E+03	8.64E+02
1.48E+03	8.59E+02
1.48E+03	8.49E+02
1.48E+03	8.57E+02
1.49E+03	8.59E+02
1.49E+03	8.53E+02
1.49E+03	8.51E+02
1.49E+03	8.47E+02
1.50E+03	8.57E+02
1.50E+03	8.53E+02
1.50E+03	8.63E+02
1.50E+03	8.47E+02
1.50E+03	8.65E+02
1.51E+03	8.71E+02
1.51E+03	8.68E+02
1.51E+03	8.52E+02
1.51E+03	8.59E+02
1.52E+03	8.60E+02
1.52E+03	8.59E+02
1.52E+03	8.70E+02
1.52E+03	8.72E+02
1.53E+03	8.75E+02
1.53E+03	8.76E+02
1.53E+03	8.82E+02
1.53E+03	8.87E+02
1.54E+03	8.89E+02
1.54E+03	8.80E+02
1.54E+03	8.80E+02
1.54E+03	8.95E+02
1.55E+03	9.13E+02
1.55E+03	9.18E+02
1.55E+03	9.44E+02
1.55E+03	9.60E+02
1.56E+03	9.79E+02
1.56E+03	1.01E+03
1.56E+03	1.04E+03
1.56E+03	1.10E+03
1.57E+03	1.15E+03
1.57E+03	1.25E+03
1.57E+03	1.38E+03
1.57E+03	1.54E+03
1.58E+03	1.66E+03
1.58E+03	1.73E+03
1.58E+03	1.73E+03
1.58E+03	1.69E+03
1.59E+03	1.62E+03
1.59E+03	1.49E+03
1.59E+03	1.36E+03
1.59E+03	1.25E+03
1.60E+03	1.15E+03
1.60E+03	1.09E+03
1.60E+03	1.04E+03
1.60E+03	9.94E+02
1.61E+03	9.73E+02
1.61E+03	9.53E+02
1.61E+03	9.36E+02
1.61E+03	9.26E+02
1.62E+03	9.22E+02
1.62E+03	9.25E+02
1.62E+03	9.17E+02
1.62E+03	9.05E+02
1.62E+03	8.99E+02
1.63E+03	8.87E+02
1.63E+03	8.81E+02
1.63E+03	8.77E+02
1.63E+03	8.74E+02
1.64E+03	8.70E+02
1.64E+03	8.79E+02
1.64E+03	8.68E+02
1.64E+03	8.60E+02
1.65E+03	8.61E+02
1.65E+03	8.48E+02
1.65E+03	8.52E+02
1.65E+03	8.52E+02
1.66E+03	8.62E+02
1.66E+03	8.53E+02
1.66E+03	8.51E+02
1.66E+03	8.46E+02
1.67E+03	8.44E+02
1.67E+03	8.47E+02
1.67E+03	8.54E+02
1.67E+03	8.52E+02
1.68E+03	8.44E+02
1.68E+03	8.58E+02
1.68E+03	8.56E+02
1.68E+03	8.54E+02
1.69E+03	8.49E+02
1.69E+03	8.46E+02
1.69E+03	8.48E+02
1.69E+03	8.53E+02
1.70E+03	8.42E+02
1.70E+03	8.44E+02
1.70E+03	8.41E+02
1.70E+03	8.39E+02
1.70E+03	8.37E+02
1.71E+03	8.31E+02
1.71E+03	8.47E+02
1.71E+03	8.41E+02
1.71E+03	8.39E+02
1.72E+03	8.34E+02
1.72E+03	8.35E+02
1.72E+03	8.35E+02
1.72E+03	8.40E+02
1.73E+03	8.41E+02
1.73E+03	8.37E+02
1.73E+03	8.42E+02
1.73E+03	8.33E+02
1.74E+03	8.37E+02
1.74E+03	8.30E+02
1.74E+03	8.48E+02
1.74E+03	8.41E+02
1.75E+03	8.46E+02
1.75E+03	8.31E+02
1.75E+03	8.40E+02
1.75E+03	8.44E+02
1.76E+03	8.42E+02
1.76E+03	8.52E+02
1.76E+03	8.47E+02
1.76E+03	8.41E+02
1.76E+03	8.42E+02
1.77E+03	8.36E+02
1.77E+03	8.35E+02
1.77E+03	8.29E+02
1.77E+03	8.37E+02
1.78E+03	8.44E+02
1.78E+03	8.42E+02
1.78E+03	8.38E+02
1.78E+03	8.41E+02
1.79E+03	8.41E+02
1.79E+03	8.46E+02
1.79E+03	8.46E+02
1.79E+03	8.38E+02
1.80E+03	8.49E+02
1.80E+03	8.42E+02
1.80E+03	8.40E+02
1.80E+03	8.46E+02
1.81E+03	8.38E+02
1.81E+03	8.44E+02
1.81E+03	8.35E+02
1.81E+03	8.40E+02
1.81E+03	8.36E+02
1.82E+03	8.45E+02
1.82E+03	8.45E+02
1.82E+03	8.41E+02
1.82E+03	8.30E+02
1.83E+03	8.29E+02
1.83E+03	8.34E+02
1.83E+03	8.35E+02
1.83E+03	8.42E+02
1.84E+03	8.50E+02
1.84E+03	8.42E+02
1.84E+03	8.39E+02
1.84E+03	8.47E+02
1.85E+03	8.37E+02
1.85E+03	8.38E+02
1.85E+03	8.39E+02
1.85E+03	8.47E+02
1.85E+03	8.47E+02
1.86E+03	8.46E+02
1.86E+03	8.42E+02
1.86E+03	8.42E+02
1.86E+03	8.34E+02
1.87E+03	8.41E+02
1.87E+03	8.30E+02
1.87E+03	8.32E+02
1.87E+03	8.44E+02
1.88E+03	8.44E+02
1.88E+03	8.50E+02
1.88E+03	8.51E+02
1.88E+03	8.46E+02
1.89E+03	8.45E+02
1.89E+03	8.46E+02
1.89E+03	8.57E+02
1.89E+03	8.49E+02
1.89E+03	8.38E+02
1.90E+03	8.51E+02
1.90E+03	8.52E+02
1.90E+03	8.71E+02
1.90E+03	8.52E+02
1.91E+03	8.54E+02
1.91E+03	8.52E+02
1.91E+03	8.57E+02
1.91E+03	8.44E+02
1.92E+03	8.50E+02
1.92E+03	8.40E+02
1.92E+03	8.41E+02
1.92E+03	8.46E+02
1.93E+03	8.51E+02
1.93E+03	8.57E+02
1.93E+03	8.53E+02
1.93E+03	8.64E+02
1.93E+03	8.57E+02
1.94E+03	8.52E+02
1.94E+03	8.55E+02
1.94E+03	8.51E+02
1.94E+03	8.52E+02
1.95E+03	8.57E+02
1.95E+03	8.44E+02
1.95E+03	8.44E+02
1.95E+03	8.54E+02
1.96E+03	8.52E+02
1.96E+03	8.52E+02
1.96E+03	8.44E+02
1.96E+03	8.49E+02
1.96E+03	8.46E+02
1.97E+03	8.53E+02
1.97E+03	8.57E+02
1.97E+03	8.57E+02
1.97E+03	8.55E+02
1.98E+03	8.52E+02
1.98E+03	8.58E+02
1.98E+03	8.51E+02
1.98E+03	8.45E+02
1.99E+03	8.53E+02
1.99E+03	8.51E+02
1.99E+03	8.48E+02
1.99E+03	8.48E+02
2.00E+03	8.61E+02
2.00E+03	8.61E+02
2.00E+03	8.54E+02
2.00E+03	8.57E+02
2.00E+03	8.52E+02
2.01E+03	8.47E+02
2.01E+03	8.58E+02
2.01E+03	8.49E+02
2.01E+03	8.55E+02
2.02E+03	8.47E+02
2.02E+03	8.49E+02
2.02E+03	8.63E+02
2.02E+03	8.63E+02
2.03E+03	8.57E+02
2.03E+03	8.66E+02
2.03E+03	8.55E+02
2.03E+03	8.57E+02
2.03E+03	8.63E+02
2.04E+03	8.65E+02
2.04E+03	8.55E+02
2.04E+03	8.58E+02
2.04E+03	8.61E+02
2.05E+03	8.58E+02
2.05E+03	8.57E+02
2.05E+03	8.51E+02
2.05E+03	8.44E+02
2.06E+03	8.59E+02
2.06E+03	8.61E+02
2.06E+03	8.70E+02
2.06E+03	8.74E+02
2.06E+03	8.58E+02
2.07E+03	8.56E+02
2.07E+03	8.64E+02
2.07E+03	8.58E+02
2.07E+03	8.46E+02
2.08E+03	8.57E+02
2.08E+03	8.48E+02
2.08E+03	8.60E+02
2.08E+03	8.61E+02
2.09E+03	8.65E+02
2.09E+03	8.57E+02
2.09E+03	8.46E+02
2.09E+03	8.55E+02
2.09E+03	8.59E+02
2.10E+03	8.66E+02
2.10E+03	8.64E+02
2.10E+03	8.46E+02
2.10E+03	8.59E+02
2.11E+03	8.60E+02
2.11E+03	8.75E+02
2.11E+03	8.78E+02
2.11E+03	8.63E+02
2.11E+03	8.46E+02
2.12E+03	8.55E+02
2.12E+03	8.68E+02
2.12E+03	8.67E+02
2.12E+03	8.65E+02
2.13E+03	8.61E+02
2.13E+03	8.55E+02
2.13E+03	8.59E+02
2.13E+03	8.61E+02
2.14E+03	8.73E+02
2.14E+03	8.62E+02
2.14E+03	8.67E+02
2.14E+03	8.63E+02
2.14E+03	8.59E+02
2.15E+03	8.55E+02
2.15E+03	8.56E+02
2.15E+03	8.64E+02
2.15E+03	8.56E+02
2.16E+03	8.56E+02
2.16E+03	8.57E+02
2.16E+03	8.64E+02
2.16E+03	8.70E+02
2.16E+03	8.66E+02
2.17E+03	8.48E+02
2.17E+03	8.58E+02
2.17E+03	8.58E+02
2.17E+03	8.55E+02
2.18E+03	8.54E+02
2.18E+03	8.68E+02
2.18E+03	8.71E+02
2.18E+03	8.63E+02
2.19E+03	8.70E+02
2.19E+03	8.67E+02
2.19E+03	8.68E+02
2.19E+03	8.65E+02
2.19E+03	8.67E+02
2.20E+03	8.61E+02
2.20E+03	8.63E+02
2.20E+03	8.67E+02
2.20E+03	8.63E+02
2.21E+03	8.60E+02
2.21E+03	8.58E+02
2.21E+03	8.64E+02
2.21E+03	8.67E+02
2.21E+03	8.62E+02
2.22E+03	8.68E+02
2.22E+03	8.73E+02
2.22E+03	8.72E+02
2.22E+03	8.60E+02
2.23E+03	8.59E+02
2.23E+03	8.74E+02
2.23E+03	8.83E+02
2.23E+03	8.74E+02
2.23E+03	8.69E+02
2.24E+03	8.70E+02
2.24E+03	8.81E+02
2.24E+03	8.82E+02
2.24E+03	8.74E+02
2.25E+03	8.64E+02
2.25E+03	8.65E+02
2.25E+03	8.77E+02
2.25E+03	8.86E+02
2.26E+03	8.87E+02
2.26E+03	8.82E+02
2.26E+03	8.77E+02
2.26E+03	8.74E+02
2.26E+03	8.75E+02
2.27E+03	8.71E+02
2.27E+03	8.69E+02
2.27E+03	8.69E+02
2.27E+03	8.69E+02
2.28E+03	8.76E+02
2.28E+03	8.80E+02
2.28E+03	8.70E+02
2.28E+03	8.70E+02
2.28E+03	8.64E+02
2.29E+03	8.72E+02
2.29E+03	8.75E+02
2.29E+03	8.74E+02
2.29E+03	8.73E+02
2.30E+03	8.82E+02
2.30E+03	8.74E+02
2.30E+03	8.71E+02
2.30E+03	8.86E+02
2.30E+03	8.78E+02
2.31E+03	8.69E+02
2.31E+03	8.88E+02
2.31E+03	8.93E+02
2.31E+03	8.81E+02
2.32E+03	8.80E+02
2.32E+03	8.73E+02
2.32E+03	8.79E+02
2.32E+03	8.80E+02
2.32E+03	8.75E+02
2.33E+03	8.76E+02
2.33E+03	8.94E+02
2.33E+03	8.66E+02
2.33E+03	8.72E+02
2.34E+03	8.75E+02
2.34E+03	8.86E+02
2.34E+03	8.91E+02
2.34E+03	8.86E+02
2.34E+03	8.89E+02
2.35E+03	8.91E+02
2.35E+03	8.95E+02
2.35E+03	8.97E+02
2.35E+03	8.88E+02
2.36E+03	8.78E+02
2.36E+03	8.97E+02
2.36E+03	9.06E+02
2.36E+03	8.96E+02
2.36E+03	8.87E+02
2.37E+03	8.94E+02
2.37E+03	8.89E+02
2.37E+03	8.86E+02
2.37E+03	8.95E+02
2.38E+03	9.02E+02
2.38E+03	8.98E+02
2.38E+03	9.06E+02
2.38E+03	8.97E+02
2.38E+03	9.01E+02
2.39E+03	9.04E+02
2.39E+03	9.03E+02
2.39E+03	9.04E+02
2.39E+03	9.01E+02
2.40E+03	9.00E+02
2.40E+03	9.03E+02
2.40E+03	9.10E+02
2.40E+03	9.01E+02
2.40E+03	8.98E+02
2.41E+03	9.05E+02
2.41E+03	9.02E+02
2.41E+03	8.94E+02
2.41E+03	8.90E+02
2.41E+03	9.03E+02
2.42E+03	9.26E+02
2.42E+03	9.18E+02
2.42E+03	9.16E+02
2.42E+03	9.05E+02
2.43E+03	9.03E+02
2.43E+03	8.97E+02
2.43E+03	9.22E+02
2.43E+03	9.26E+02
2.43E+03	9.18E+02
2.44E+03	9.25E+02
2.44E+03	9.21E+02
2.44E+03	9.31E+02
2.44E+03	9.28E+02
2.45E+03	9.42E+02
2.45E+03	9.42E+02
2.45E+03	9.31E+02
2.45E+03	9.37E+02
2.45E+03	9.37E+02
2.46E+03	9.41E+02
2.46E+03	9.27E+02
2.46E+03	9.43E+02
2.46E+03	9.43E+02
2.47E+03	9.45E+02
2.47E+03	9.33E+02
2.47E+03	9.34E+02
2.47E+03	9.38E+02
2.47E+03	9.44E+02
2.48E+03	9.35E+02
2.48E+03	9.37E+02
2.48E+03	9.33E+02
2.48E+03	9.34E+02
2.48E+03	9.34E+02
2.49E+03	9.43E+02
2.49E+03	9.29E+02
2.49E+03	9.33E+02
2.49E+03	9.28E+02
2.50E+03	9.40E+02
2.50E+03	9.37E+02
2.50E+03	9.31E+02
2.50E+03	9.26E+02
2.50E+03	9.36E+02
2.51E+03	9.45E+02
2.51E+03	9.41E+02
2.51E+03	9.34E+02
2.51E+03	9.31E+02
2.52E+03	9.37E+02
2.52E+03	9.34E+02
2.52E+03	9.41E+02
2.52E+03	9.32E+02
2.52E+03	9.40E+02
2.53E+03	9.47E+02
2.53E+03	9.42E+02
2.53E+03	9.41E+02
2.53E+03	9.26E+02
2.53E+03	9.36E+02
2.54E+03	9.45E+02
2.54E+03	9.36E+02
2.54E+03	9.36E+02
2.54E+03	9.52E+02
2.55E+03	9.39E+02
2.55E+03	9.42E+02
2.55E+03	9.28E+02
2.55E+03	9.42E+02
2.55E+03	9.49E+02
2.56E+03	9.54E+02
2.56E+03	9.43E+02
2.56E+03	9.54E+02
2.56E+03	9.56E+02
2.56E+03	9.59E+02
2.57E+03	9.54E+02
2.57E+03	9.71E+02
2.57E+03	9.55E+02
2.57E+03	9.52E+02
2.58E+03	9.53E+02
2.58E+03	9.70E+02
2.58E+03	9.64E+02
2.58E+03	9.65E+02
2.58E+03	9.62E+02
2.59E+03	9.73E+02
2.59E+03	9.84E+02
2.59E+03	9.66E+02
2.59E+03	9.63E+02
2.59E+03	9.77E+02
2.60E+03	9.75E+02
2.60E+03	9.79E+02
2.60E+03	9.76E+02
2.60E+03	9.88E+02
2.61E+03	9.94E+02
2.61E+03	9.91E+02
2.61E+03	9.98E+02
2.61E+03	9.95E+02
2.61E+03	9.98E+02
2.62E+03	9.95E+02
2.62E+03	1.00E+03
2.62E+03	9.96E+02
2.62E+03	1.01E+03
2.62E+03	1.03E+03
2.63E+03	1.02E+03
2.63E+03	1.01E+03
2.63E+03	1.02E+03
2.63E+03	1.03E+03
2.64E+03	1.05E+03
2.64E+03	1.06E+03
2.64E+03	1.06E+03
2.64E+03	1.05E+03
2.64E+03	1.04E+03
2.65E+03	1.06E+03
2.65E+03	1.09E+03
2.65E+03	1.08E+03
2.65E+03	1.09E+03
2.65E+03	1.11E+03
2.66E+03	1.11E+03
2.66E+03	1.12E+03
2.66E+03	1.13E+03
2.66E+03	1.15E+03
2.67E+03	1.12E+03
2.67E+03	1.14E+03
2.67E+03	1.17E+03
2.67E+03	1.19E+03
2.67E+03	1.22E+03
2.68E+03	1.24E+03
2.68E+03	1.24E+03
2.68E+03	1.24E+03
2.68E+03	1.23E+03
2.68E+03	1.26E+03
2.69E+03	1.24E+03
2.69E+03	1.24E+03
2.69E+03	1.25E+03
2.69E+03	1.27E+03
2.69E+03	1.30E+03
2.70E+03	1.30E+03
2.70E+03	1.34E+03
2.70E+03	1.37E+03
2.70E+03	1.34E+03
2.71E+03	1.31E+03
2.71E+03	1.30E+03
2.71E+03	1.31E+03
2.71E+03	1.32E+03
2.71E+03	1.34E+03
2.72E+03	1.33E+03
2.72E+03	1.38E+03
2.72E+03	1.38E+03
2.72E+03	1.37E+03
2.72E+03	1.34E+03
2.73E+03	1.30E+03
2.73E+03	1.31E+03
2.73E+03	1.29E+03
2.73E+03	1.27E+03
2.73E+03	1.24E+03
2.74E+03	1.22E+03
2.74E+03	1.21E+03
2.74E+03	1.18E+03
2.74E+03	1.17E+03
2.75E+03	1.14E+03
2.75E+03	1.13E+03
2.75E+03	1.12E+03
2.75E+03	1.10E+03
2.75E+03	1.09E+03
2.76E+03	1.07E+03
2.76E+03	1.06E+03
2.76E+03	1.05E+03
2.76E+03	1.04E+03
2.76E+03	1.04E+03
2.77E+03	1.02E+03
2.77E+03	1.03E+03
2.77E+03	1.03E+03
2.77E+03	1.02E+03
2.77E+03	1.00E+03
2.78E+03	1.00E+03
2.78E+03	1.01E+03
2.78E+03	1.01E+03
2.78E+03	1.02E+03
2.79E+03	1.01E+03
2.79E+03	1.00E+03
2.79E+03	1.00E+03
2.79E+03	1.01E+03
2.79E+03	1.00E+03
2.80E+03	9.82E+02
2.80E+03	9.90E+02
2.80E+03	9.96E+02
2.80E+03	9.94E+02
2.80E+03	1.00E+03
2.81E+03	1.01E+03
2.81E+03	1.00E+03
2.81E+03	9.83E+02
2.81E+03	9.90E+02
2.81E+03	9.91E+02
2.82E+03	9.87E+02
2.82E+03	9.86E+02
2.82E+03	9.81E+02
2.82E+03	9.99E+02
2.82E+03	1.01E+03
2.83E+03	9.95E+02
2.83E+03	9.88E+02
2.83E+03	9.78E+02
2.83E+03	9.90E+02
2.84E+03	9.96E+02
2.84E+03	1.00E+03
2.84E+03	9.78E+02
2.84E+03	9.95E+02
2.84E+03	1.01E+03
2.85E+03	1.00E+03
2.85E+03	9.97E+02
2.85E+03	9.97E+02
2.85E+03	9.87E+02
2.85E+03	9.89E+02
2.86E+03	1.01E+03
2.86E+03	1.00E+03
2.86E+03	1.02E+03
2.86E+03	1.01E+03
2.86E+03	1.00E+03
2.87E+03	9.90E+02
2.87E+03	9.91E+02
2.87E+03	9.85E+02
2.87E+03	9.95E+02
2.87E+03	9.98E+02
2.88E+03	9.95E+02
2.88E+03	9.82E+02
2.88E+03	9.84E+02
2.88E+03	1.00E+03
2.88E+03	1.01E+03
2.89E+03	1.00E+03
2.89E+03	9.87E+02
2.89E+03	9.97E+02
2.89E+03	9.99E+02
2.89E+03	1.00E+03
2.90E+03	1.00E+03
2.90E+03	1.00E+03
2.90E+03	1.01E+03
2.90E+03	1.02E+03
2.91E+03	1.01E+03
2.91E+03	9.87E+02
2.91E+03	9.84E+02
2.91E+03	9.90E+02
2.91E+03	9.99E+02
2.92E+03	1.00E+03
2.92E+03	1.02E+03
2.92E+03	1.01E+03
2.92E+03	9.98E+02
2.92E+03	9.88E+02
2.93E+03	9.88E+02
2.93E+03	9.92E+02
2.93E+03	1.00E+03
2.93E+03	9.98E+02
2.93E+03	9.85E+02
2.94E+03	9.90E+02
2.94E+03	9.74E+02
2.94E+03	9.92E+02
2.94E+03	1.01E+03
2.94E+03	1.01E+03
2.95E+03	1.00E+03
2.95E+03	9.79E+02
2.95E+03	9.90E+02
2.95E+03	9.78E+02
2.95E+03	9.83E+02
2.96E+03	9.92E+02
2.96E+03	9.97E+02
2.96E+03	9.78E+02
2.96E+03	9.83E+02
2.96E+03	9.80E+02
2.97E+03	9.88E+02
2.97E+03	9.89E+02
2.97E+03	9.90E+02
2.97E+03	9.90E+02
2.97E+03	9.91E+02
2.98E+03	9.77E+02
2.98E+03	9.60E+02
2.98E+03	9.77E+02
2.98E+03	9.75E+02
2.98E+03	9.82E+02
2.99E+03	9.81E+02
2.99E+03	9.78E+02
2.99E+03	9.74E+02
2.99E+03	9.73E+02
2.99E+03	9.69E+02
3.00E+03	9.64E+02
3.00E+03	9.75E+02
3.00E+03	9.66E+02
3.00E+03	9.63E+02
3.01E+03	9.72E+02
3.01E+03	9.80E+02
3.01E+03	9.83E+02
3.01E+03	9.80E+02
3.01E+03	9.82E+02
3.02E+03	9.67E+02
3.02E+03	9.58E+02
3.02E+03	9.53E+02
3.02E+03	9.59E+02
3.02E+03	9.58E+02
3.03E+03	9.67E+02
3.03E+03	9.74E+02
3.03E+03	9.64E+02
3.03E+03	9.64E+02
3.03E+03	9.68E+02
3.04E+03	9.65E+02
3.04E+03	9.68E+02
3.04E+03	9.92E+02
3.04E+03	9.80E+02
3.04E+03	9.58E+02
3.05E+03	9.54E+02
3.05E+03	9.60E+02
3.05E+03	9.59E+02
3.05E+03	9.71E+02
3.05E+03	9.70E+02
3.06E+03	9.55E+02
3.06E+03	9.62E+02
3.06E+03	9.76E+02
3.06E+03	9.81E+02
3.06E+03	9.71E+02
3.07E+03	9.60E+02
3.07E+03	9.80E+02
3.07E+03	9.72E+02
3.07E+03	9.55E+02
3.07E+03	9.68E+02
3.08E+03	9.67E+02
3.08E+03	9.76E+02
3.08E+03	9.61E+02
3.08E+03	9.69E+02
3.08E+03	9.63E+02
3.09E+03	9.70E+02
3.09E+03	9.65E+02
3.09E+03	9.60E+02
3.09E+03	9.58E+02
3.09E+03	9.50E+02
3.10E+03	9.64E+02
3.10E+03	9.66E+02
3.10E+03	9.55E+02
3.10E+03	9.69E+02
3.10E+03	9.78E+02
3.11E+03	9.76E+02
3.11E+03	9.81E+02
3.11E+03	9.77E+02
3.11E+03	9.70E+02
3.11E+03	9.69E+02
3.12E+03	9.68E+02
3.12E+03	9.72E+02
3.12E+03	9.65E+02
3.12E+03	9.73E+02
3.12E+03	9.60E+02
3.13E+03	9.59E+02
3.13E+03	9.70E+02
3.13E+03	9.79E+02
3.13E+03	9.79E+02
3.13E+03	9.84E+02
3.14E+03	9.65E+02
3.14E+03	9.76E+02
3.14E+03	9.73E+02
3.14E+03	9.79E+02
3.14E+03	9.75E+02
3.15E+03	9.64E+02
3.15E+03	9.62E+02
3.15E+03	9.70E+02
3.15E+03	9.67E+02
3.15E+03	9.55E+02
3.16E+03	9.63E+02
3.16E+03	9.71E+02
3.16E+03	9.68E+02
3.16E+03	9.75E+02
3.16E+03	9.72E+02
3.17E+03	9.66E+02
3.17E+03	9.59E+02
3.17E+03	9.74E+02
3.17E+03	9.71E+02
3.17E+03	9.62E+02
3.18E+03	9.72E+02
3.18E+03	9.78E+02
3.18E+03	9.82E+02
3.18E+03	9.77E+02
3.18E+03	9.67E+02
3.19E+03	9.55E+02
3.19E+03	9.58E+02
3.19E+03	9.70E+02
3.19E+03	9.71E+02
3.19E+03	9.62E+02
3.19E+03	9.64E+02
3.20E+03	9.74E+02
3.20E+03	9.76E+02
3.20E+03	9.74E+02
3.20E+03	9.72E+02
3.20E+03	9.58E+02
3.21E+03	9.61E+02
3.21E+03	9.64E+02
3.21E+03	9.64E+02
3.21E+03	9.62E+02
3.21E+03	9.64E+02
3.22E+03	9.72E+02
3.22E+03	9.80E+02
3.22E+03	9.74E+02
3.22E+03	9.74E+02
3.22E+03	9.79E+02
3.23E+03	9.85E+02
3.23E+03	9.83E+02
3.23E+03	1.00E+03
3.23E+03	9.95E+02
3.23E+03	9.95E+02
3.24E+03	9.94E+02
3.24E+03	1.01E+03
3.24E+03	1.01E+03
3.24E+03	1.01E+03
3.24E+03	1.02E+03
3.25E+03	1.02E+03
3.25E+03	1.00E+03
3.25E+03	1.00E+03
3.25E+03	9.89E+02
3.25E+03	9.94E+02
3.26E+03	9.74E+02
3.26E+03	9.74E+02
3.26E+03	9.76E+02
3.26E+03	9.69E+02
3.26E+03	9.70E+02
3.27E+03	9.64E+02
3.27E+03	9.66E+02
3.27E+03	9.74E+02
3.27E+03	9.51E+02
3.27E+03	9.58E+02
3.28E+03	9.56E+02
3.28E+03	9.61E+02
3.28E+03	9.72E+02
3.28E+03	9.67E+02
3.28E+03	9.48E+02
3.29E+03	9.72E+02
3.29E+03	9.72E+02
3.29E+03	9.77E+02
3.29E+03	9.68E+02
3.29E+03	9.65E+02
3.29E+03	9.70E+02
3.30E+03	9.69E+02
3.30E+03	9.71E+02
3.30E+03	9.76E+02
3.30E+03	9.77E+02
3.30E+03	9.68E+02
3.31E+03	9.81E+02
3.31E+03	9.81E+02
3.31E+03	9.71E+02
3.31E+03	9.58E+02
3.31E+03	9.56E+02
3.32E+03	9.60E+02
3.32E+03	9.65E+02
3.32E+03	9.70E+02
3.32E+03	9.74E+02
3.32E+03	9.60E+02
3.33E+03	9.74E+02
3.33E+03	9.44E+02
3.33E+03	9.63E+02
3.33E+03	9.58E+02
3.33E+03	9.64E+02
3.34E+03	9.84E+02
3.34E+03	9.78E+02
3.34E+03	9.67E+02
3.34E+03	9.67E+02
3.34E+03	9.65E+02
3.35E+03	9.67E+02
3.35E+03	9.61E+02
3.35E+03	9.67E+02
3.35E+03	9.64E+02
3.35E+03	9.79E+02
3.35E+03	9.74E+02
3.36E+03	9.82E+02
3.36E+03	9.85E+02
3.36E+03	9.71E+02
3.36E+03	9.73E+02
3.36E+03	9.66E+02
3.37E+03	9.72E+02
3.37E+03	9.73E+02
3.37E+03	9.65E+02
3.37E+03	9.75E+02
3.37E+03	9.80E+02
3.38E+03	9.75E+02
3.38E+03	9.74E+02
3.38E+03	9.77E+02
3.38E+03	9.85E+02
3.38E+03	9.82E+02
3.39E+03	9.74E+02
3.39E+03	9.73E+02
3.39E+03	9.84E+02
3.39E+03	9.60E+02
3.39E+03	9.70E+02
3.40E+03	9.55E+02
3.40E+03	9.67E+02
3.40E+03	9.89E+02
3.40E+03	9.72E+02
3.40E+03	9.77E+02
3.40E+03	9.72E+02
3.41E+03	9.65E+02
3.41E+03	9.73E+02
3.41E+03	9.79E+02
3.41E+03	9.87E+02
3.41E+03	9.72E+02
3.42E+03	9.77E+02
3.42E+03	9.76E+02
3.42E+03	9.61E+02
3.42E+03	9.66E+02
3.42E+03	9.78E+02
3.43E+03	9.79E+02
3.43E+03	9.60E+02
3.43E+03	9.84E+02
3.43E+03	9.85E+02
3.43E+03	9.81E+02
3.44E+03	9.77E+02
3.44E+03	9.84E+02
3.44E+03	9.78E+02
3.44E+03	9.70E+02
3.44E+03	9.67E+02
3.44E+03	9.68E+02
3.45E+03	9.88E+02
3.45E+03	9.89E+02
3.45E+03	9.79E+02
3.45E+03	9.84E+02
3.45E+03	1.00E+03
3.46E+03	9.78E+02
3.46E+03	9.57E+02
3.46E+03	9.51E+02
3.46E+03	9.66E+02
3.46E+03	9.77E+02
3.47E+03	9.91E+02
3.47E+03	1.00E+03
3.47E+03	9.98E+02
3.47E+03	9.93E+02
3.47E+03	1.00E+03
3.48E+03	9.97E+02
3.48E+03	9.92E+02
3.48E+03	9.80E+02
3.48E+03	9.82E+02
3.48E+03	9.91E+02
3.48E+03	9.92E+02
3.49E+03	9.77E+02
3.49E+03	9.85E+02
3.49E+03	9.94E+02
3.49E+03	9.77E+02
3.49E+03	9.93E+02
3.50E+03	9.99E+02
3.50E+03	9.99E+02
3.50E+03	9.88E+02
3.50E+03	9.96E+02
3.50E+03	9.83E+02
3.51E+03	9.98E+02
3.51E+03	9.95E+02
3.51E+03	9.94E+02
3.51E+03	9.90E+02
3.51E+03	1.01E+03
3.51E+03	1.01E+03
3.52E+03	9.99E+02
3.52E+03	9.99E+02
3.52E+03	1.00E+03
3.52E+03	9.98E+02
3.52E+03	1.00E+03
3.53E+03	9.89E+02
3.53E+03	9.86E+02
3.53E+03	9.94E+02
3.53E+03	1.00E+03
3.53E+03	9.97E+02
3.54E+03	1.01E+03
3.54E+03	1.01E+03
3.54E+03	1.00E+03
3.54E+03	9.90E+02
3.54E+03	9.94E+02
3.54E+03	9.96E+02
3.55E+03	1.00E+03
3.55E+03	1.00E+03
3.55E+03	9.88E+02
3.55E+03	9.92E+02
3.55E+03	9.88E+02
3.56E+03	9.82E+02
3.56E+03	1.01E+03
3.56E+03	1.01E+03
3.56E+03	1.00E+03
3.56E+03	9.98E+02
3.57E+03	1.02E+03
3.57E+03	1.00E+03
3.57E+03	1.00E+03
3.57E+03	1.01E+03
3.57E+03	1.00E+03
3.57E+03	9.96E+02
3.58E+03	1.00E+03
3.58E+03	1.00E+03
3.58E+03	1.01E+03
3.58E+03	1.02E+03
3.58E+03	1.00E+03
3.59E+03	9.97E+02
3.59E+03	1.01E+03
3.59E+03	1.02E+03
3.59E+03	1.01E+03
3.59E+03	9.93E+02
3.60E+03	9.99E+02
3.60E+03	1.00E+03
3.60E+03	9.96E+02
3.60E+03	1.02E+03
3.60E+03	1.02E+03
3.60E+03	1.01E+03
3.61E+03	1.02E+03
3.61E+03	1.00E+03
3.61E+03	1.00E+03
3.61E+03	1.02E+03
3.61E+03	1.01E+03
3.62E+03	9.99E+02
3.62E+03	1.00E+03
3.62E+03	1.02E+03
3.62E+03	1.02E+03
3.62E+03	1.03E+03
3.62E+03	1.01E+03
3.63E+03	1.01E+03
3.63E+03	1.01E+03
3.63E+03	1.02E+03
3.63E+03	1.03E+03
3.63E+03	1.02E+03
3.64E+03	1.02E+03
3.64E+03	1.01E+03
3.64E+03	1.01E+03
3.64E+03	1.01E+03
3.64E+03	1.02E+03
3.65E+03	1.01E+03
3.65E+03	1.01E+03
3.65E+03	1.02E+03
3.65E+03	1.03E+03
3.65E+03	1.02E+03
3.65E+03	1.03E+03
3.66E+03	1.02E+03
3.66E+03	1.01E+03
3.66E+03	1.01E+03
3.66E+03	1.02E+03
3.66E+03	1.01E+03
3.67E+03	1.02E+03
3.67E+03	1.03E+03
3.67E+03	1.03E+03
3.67E+03	1.02E+03
3.67E+03	1.03E+03
3.67E+03	1.02E+03
3.68E+03	1.02E+03
3.68E+03	1.03E+03
3.68E+03	1.02E+03
3.68E+03	1.02E+03
3.68E+03	1.01E+03
3.69E+03	1.02E+03
3.69E+03	1.03E+03
3.69E+03	1.03E+03
3.69E+03	1.03E+03
3.69E+03	1.04E+03
3.69E+03	1.02E+03
3.70E+03	1.03E+03
3.70E+03	1.01E+03
3.70E+03	1.02E+03
3.70E+03	1.02E+03
3.70E+03	1.02E+03
3.71E+03	1.03E+03
3.71E+03	1.04E+03
3.71E+03	1.03E+03
3.71E+03	1.04E+03
3.71E+03	1.04E+03
3.72E+03	1.02E+03
3.72E+03	1.02E+03
3.72E+03	1.02E+03
3.72E+03	1.01E+03
3.72E+03	1.02E+03
3.72E+03	1.03E+03
3.73E+03	1.03E+03
3.73E+03	1.05E+03
3.73E+03	1.04E+03
3.73E+03	1.03E+03
3.73E+03	1.01E+03
3.74E+03	1.02E+03
3.74E+03	1.01E+03
3.74E+03	1.02E+03
3.74E+03	1.03E+03
3.74E+03	1.01E+03
3.74E+03	1.03E+03
3.75E+03	1.04E+03
3.75E+03	1.01E+03
3.75E+03	1.01E+03
3.75E+03	1.01E+03
3.75E+03	1.01E+03
3.76E+03	1.03E+03
3.76E+03	1.04E+03
3.76E+03	1.03E+03
3.76E+03	1.04E+03
3.76E+03	1.03E+03
3.76E+03	1.03E+03
3.77E+03	1.02E+03
3.77E+03	1.02E+03
3.77E+03	1.02E+03
3.77E+03	1.04E+03
3.77E+03	1.03E+03
3.78E+03	1.05E+03
3.78E+03	1.04E+03
3.78E+03	1.03E+03
3.78E+03	1.04E+03
3.78E+03	1.04E+03
3.78E+03	1.04E+03
3.79E+03	1.04E+03
3.79E+03	1.04E+03
3.79E+03	1.06E+03
3.79E+03	1.03E+03
3.79E+03	1.01E+03
3.80E+03	1.02E+03
3.80E+03	1.03E+03
3.80E+03	1.04E+03
3.80E+03	1.04E+03
3.80E+03	1.03E+03
3.80E+03	1.03E+03
3.81E+03	1.04E+03
3.81E+03	1.05E+03
3.81E+03	1.04E+03
3.81E+03	1.03E+03
3.81E+03	1.04E+03
3.81E+03	1.04E+03
3.82E+03	1.03E+03
3.82E+03	1.03E+03
3.82E+03	1.04E+03
3.82E+03	1.03E+03
3.82E+03	1.03E+03
3.83E+03	1.03E+03
3.83E+03	1.03E+03
3.83E+03	1.03E+03
3.83E+03	1.04E+03
3.83E+03	1.04E+03
3.83E+03	1.04E+03
3.84E+03	1.04E+03
3.84E+03	1.03E+03
3.84E+03	1.03E+03
3.84E+03	1.02E+03
3.84E+03	1.01E+03
3.85E+03	1.02E+03
3.85E+03	1.02E+03
3.85E+03	1.03E+03
3.85E+03	1.03E+03
3.85E+03	1.03E+03
3.85E+03	1.03E+03
3.86E+03	1.02E+03
3.86E+03	1.02E+03
3.86E+03	1.03E+03
3.86E+03	1.03E+03
3.86E+03	1.03E+03

## Sheet: Spessartine 2E
rel. 1/cm	CCD cts
9.47E+01	5.47E+02
9.76E+01	5.46E+02
1.00E+02	5.48E+02
1.03E+02	5.46E+02
1.06E+02	5.46E+02
1.09E+02	5.48E+02
1.12E+02	5.44E+02
1.15E+02	5.43E+02
1.18E+02	5.41E+02
1.21E+02	5.46E+02
1.24E+02	5.44E+02
1.27E+02	5.44E+02
1.30E+02	5.42E+02
1.32E+02	5.44E+02
1.35E+02	5.48E+02
1.38E+02	5.45E+02
1.41E+02	5.48E+02
1.44E+02	5.50E+02
1.47E+02	5.51E+02
1.50E+02	5.56E+02
1.53E+02	5.60E+02
1.56E+02	5.66E+02
1.59E+02	5.75E+02
1.61E+02	5.81E+02
1.64E+02	5.90E+02
1.67E+02	5.94E+02
1.70E+02	5.90E+02
1.73E+02	5.90E+02
1.76E+02	5.86E+02
1.79E+02	5.86E+02
1.82E+02	5.84E+02
1.85E+02	5.83E+02
1.87E+02	5.82E+02
1.90E+02	5.85E+02
1.93E+02	5.86E+02
1.96E+02	5.88E+02
1.99E+02	5.94E+02
2.02E+02	6.02E+02
2.05E+02	6.02E+02
2.08E+02	6.12E+02
2.10E+02	6.19E+02
2.13E+02	6.25E+02
2.16E+02	6.27E+02
2.19E+02	6.32E+02
2.22E+02	6.30E+02
2.25E+02	6.28E+02
2.28E+02	6.28E+02
2.31E+02	6.22E+02
2.33E+02	6.18E+02
2.36E+02	6.08E+02
2.39E+02	6.01E+02
2.42E+02	6.00E+02
2.45E+02	5.88E+02
2.48E+02	5.81E+02
2.51E+02	5.72E+02
2.53E+02	5.69E+02
2.56E+02	5.62E+02
2.59E+02	5.59E+02
2.62E+02	5.60E+02
2.65E+02	5.59E+02
2.68E+02	5.54E+02
2.71E+02	5.55E+02
2.73E+02	5.55E+02
2.76E+02	5.54E+02
2.79E+02	5.55E+02
2.82E+02	5.56E+02
2.85E+02	5.58E+02
2.88E+02	5.59E+02
2.91E+02	5.59E+02
2.93E+02	5.61E+02
2.96E+02	5.64E+02
2.99E+02	5.62E+02
3.02E+02	5.66E+02
3.05E+02	5.68E+02
3.08E+02	5.72E+02
3.10E+02	5.78E+02
3.13E+02	5.86E+02
3.16E+02	5.90E+02
3.19E+02	5.97E+02
3.22E+02	6.07E+02
3.25E+02	6.18E+02
3.28E+02	6.32E+02
3.30E+02	6.45E+02
3.33E+02	6.64E+02
3.36E+02	6.87E+02
3.39E+02	7.28E+02
3.42E+02	7.73E+02
3.45E+02	8.24E+02
3.47E+02	8.72E+02
3.50E+02	9.13E+02
3.53E+02	9.31E+02
3.56E+02	9.30E+02
3.59E+02	9.18E+02
3.62E+02	8.88E+02
3.64E+02	8.47E+02
3.67E+02	8.09E+02
3.70E+02	7.71E+02
3.73E+02	7.38E+02
3.76E+02	7.08E+02
3.78E+02	6.83E+02
3.81E+02	6.60E+02
3.84E+02	6.39E+02
3.87E+02	6.26E+02
3.90E+02	6.03E+02
3.93E+02	5.91E+02
3.95E+02	5.76E+02
3.98E+02	5.67E+02
4.01E+02	5.56E+02
4.04E+02	5.50E+02
4.07E+02	5.43E+02
4.09E+02	5.42E+02
4.12E+02	5.38E+02
4.15E+02	5.32E+02
4.18E+02	5.31E+02
4.21E+02	5.27E+02
4.23E+02	5.26E+02
4.26E+02	5.28E+02
4.29E+02	5.28E+02
4.32E+02	5.26E+02
4.35E+02	5.27E+02
4.37E+02	5.24E+02
4.40E+02	5.24E+02
4.43E+02	5.28E+02
4.46E+02	5.26E+02
4.49E+02	5.30E+02
4.51E+02	5.31E+02
4.54E+02	5.30E+02
4.57E+02	5.36E+02
4.60E+02	5.40E+02
4.63E+02	5.44E+02
4.65E+02	5.50E+02
4.68E+02	5.58E+02
4.71E+02	5.63E+02
4.74E+02	5.67E+02
4.77E+02	5.70E+02
4.79E+02	5.68E+02
4.82E+02	5.67E+02
4.85E+02	5.72E+02
4.88E+02	5.73E+02
4.91E+02	5.81E+02
4.93E+02	5.92E+02
4.96E+02	6.07E+02
4.99E+02	6.19E+02
5.02E+02	6.17E+02
5.04E+02	6.16E+02
5.07E+02	6.12E+02
5.10E+02	6.00E+02
5.13E+02	5.85E+02
5.16E+02	5.76E+02
5.18E+02	5.64E+02
5.21E+02	5.60E+02
5.24E+02	5.56E+02
5.27E+02	5.51E+02
5.29E+02	5.52E+02
5.32E+02	5.58E+02
5.35E+02	5.68E+02
5.38E+02	5.83E+02
5.41E+02	6.03E+02
5.43E+02	6.22E+02
5.46E+02	6.43E+02
5.49E+02	6.61E+02
5.52E+02	6.67E+02
5.54E+02	6.65E+02
5.57E+02	6.56E+02
5.60E+02	6.35E+02
5.63E+02	6.10E+02
5.65E+02	5.89E+02
5.68E+02	5.68E+02
5.71E+02	5.54E+02
5.74E+02	5.44E+02
5.76E+02	5.41E+02
5.79E+02	5.35E+02
5.82E+02	5.33E+02
5.85E+02	5.32E+02
5.87E+02	5.29E+02
5.90E+02	5.30E+02
5.93E+02	5.29E+02
5.96E+02	5.27E+02
5.98E+02	5.25E+02
6.01E+02	5.22E+02
6.04E+02	5.25E+02
6.07E+02	5.24E+02
6.09E+02	5.23E+02
6.12E+02	5.24E+02
6.15E+02	5.26E+02
6.18E+02	5.31E+02
6.20E+02	5.39E+02
6.23E+02	5.46E+02
6.26E+02	5.52E+02
6.29E+02	5.56E+02
6.31E+02	5.56E+02
6.34E+02	5.56E+02
6.37E+02	5.52E+02
6.40E+02	5.46E+02
6.42E+02	5.38E+02
6.45E+02	5.32E+02
6.48E+02	5.26E+02
6.51E+02	5.23E+02
6.53E+02	5.17E+02
6.56E+02	5.18E+02
6.59E+02	5.13E+02
6.61E+02	5.12E+02
6.64E+02	5.10E+02
6.67E+02	5.10E+02
6.70E+02	5.08E+02
6.72E+02	5.08E+02
6.75E+02	5.09E+02
6.78E+02	5.07E+02
6.81E+02	5.07E+02
6.83E+02	5.09E+02
6.86E+02	5.08E+02
6.89E+02	5.07E+02
6.91E+02	5.06E+02
6.94E+02	5.06E+02
6.97E+02	5.06E+02
7.00E+02	5.07E+02
7.02E+02	5.08E+02
7.05E+02	5.08E+02
7.08E+02	5.07E+02
7.10E+02	5.07E+02
7.13E+02	5.08E+02
7.16E+02	5.06E+02
7.19E+02	5.09E+02
7.21E+02	5.07E+02
7.24E+02	5.08E+02
7.27E+02	5.08E+02
7.29E+02	5.09E+02
7.32E+02	5.08E+02
7.35E+02	5.09E+02
7.38E+02	5.08E+02
7.40E+02	5.10E+02
7.43E+02	5.08E+02
7.46E+02	5.08E+02
7.48E+02	5.08E+02
7.51E+02	5.08E+02
7.54E+02	5.09E+02
7.57E+02	5.10E+02
7.59E+02	5.10E+02
7.62E+02	5.11E+02
7.65E+02	5.12E+02
7.67E+02	5.15E+02
7.70E+02	5.12E+02
7.73E+02	5.14E+02
7.75E+02	5.14E+02
7.78E+02	5.14E+02
7.81E+02	5.16E+02
7.83E+02	5.17E+02
7.86E+02	5.20E+02
7.89E+02	5.22E+02
7.92E+02	5.23E+02
7.94E+02	5.27E+02
7.97E+02	5.28E+02
8.00E+02	5.31E+02
8.02E+02	5.39E+02
8.05E+02	5.43E+02
8.08E+02	5.48E+02
8.10E+02	5.52E+02
8.13E+02	5.57E+02
8.16E+02	5.64E+02
8.18E+02	5.65E+02
8.21E+02	5.72E+02
8.24E+02	5.76E+02
8.26E+02	5.82E+02
8.29E+02	5.96E+02
8.32E+02	6.15E+02
8.34E+02	6.34E+02
8.37E+02	6.63E+02
8.40E+02	6.86E+02
8.42E+02	7.07E+02
8.45E+02	7.26E+02
8.48E+02	7.24E+02
8.50E+02	7.20E+02
8.53E+02	7.05E+02
8.56E+02	6.87E+02
8.58E+02	6.73E+02
8.61E+02	6.67E+02
8.64E+02	6.66E+02
8.66E+02	6.66E+02
8.69E+02	6.75E+02
8.72E+02	6.90E+02
8.74E+02	7.10E+02
8.77E+02	7.36E+02
8.80E+02	7.64E+02
8.82E+02	8.00E+02
8.85E+02	8.50E+02
8.88E+02	9.36E+02
8.90E+02	1.06E+03
8.93E+02	1.25E+03
8.96E+02	1.46E+03
8.98E+02	1.65E+03
9.01E+02	1.78E+03
9.04E+02	1.84E+03
9.06E+02	1.80E+03
9.09E+02	1.68E+03
9.12E+02	1.48E+03
9.14E+02	1.29E+03
9.17E+02	1.09E+03
9.20E+02	9.39E+02
9.22E+02	8.28E+02
9.25E+02	7.53E+02
9.28E+02	7.01E+02
9.30E+02	6.60E+02
9.33E+02	6.29E+02
9.35E+02	6.08E+02
9.38E+02	5.96E+02
9.41E+02	5.88E+02
9.43E+02	5.72E+02
9.46E+02	5.71E+02
9.49E+02	5.64E+02
9.51E+02	5.61E+02
9.54E+02	5.58E+02
9.57E+02	5.54E+02
9.59E+02	5.53E+02
9.62E+02	5.51E+02
9.65E+02	5.50E+02
9.67E+02	5.48E+02
9.70E+02	5.46E+02
9.72E+02	5.44E+02
9.75E+02	5.41E+02
9.78E+02	5.38E+02
9.80E+02	5.39E+02
9.83E+02	5.34E+02
9.86E+02	5.38E+02
9.88E+02	5.38E+02
9.91E+02	5.39E+02
9.93E+02	5.43E+02
9.96E+02	5.44E+02
9.99E+02	5.50E+02
1.00E+03	5.54E+02
1.00E+03	5.57E+02
1.01E+03	5.65E+02
1.01E+03	5.70E+02
1.01E+03	5.78E+02
1.01E+03	5.87E+02
1.02E+03	5.99E+02
1.02E+03	6.13E+02
1.02E+03	6.26E+02
1.02E+03	6.39E+02
1.03E+03	6.44E+02
1.03E+03	6.43E+02
1.03E+03	6.32E+02
1.04E+03	6.20E+02
1.04E+03	6.01E+02
1.04E+03	5.82E+02
1.04E+03	5.67E+02
1.05E+03	5.53E+02
1.05E+03	5.41E+02
1.05E+03	5.36E+02
1.05E+03	5.28E+02
1.06E+03	5.26E+02
1.06E+03	5.25E+02
1.06E+03	5.23E+02
1.06E+03	5.20E+02
1.07E+03	5.17E+02
1.07E+03	5.17E+02
1.07E+03	5.17E+02
1.07E+03	5.15E+02
1.08E+03	5.16E+02
1.08E+03	5.16E+02
1.08E+03	5.16E+02
1.08E+03	5.16E+02
1.09E+03	5.16E+02
1.09E+03	5.13E+02
1.09E+03	5.12E+02
1.10E+03	5.12E+02
1.10E+03	5.13E+02
1.10E+03	5.13E+02
1.10E+03	5.13E+02
1.11E+03	5.12E+02
1.11E+03	5.12E+02
1.11E+03	5.13E+02
1.11E+03	5.12E+02
1.12E+03	5.12E+02
1.12E+03	5.13E+02
1.12E+03	5.09E+02
1.12E+03	5.10E+02
1.13E+03	5.10E+02
1.13E+03	5.10E+02
1.13E+03	5.11E+02
1.13E+03	5.10E+02
1.14E+03	5.08E+02
1.14E+03	5.11E+02
1.14E+03	5.10E+02
1.14E+03	5.10E+02
1.15E+03	5.11E+02
1.15E+03	5.10E+02
1.15E+03	5.13E+02
1.15E+03	5.15E+02
1.16E+03	5.12E+02
1.16E+03	5.15E+02
1.16E+03	5.14E+02
1.16E+03	5.13E+02
1.17E+03	5.15E+02
1.17E+03	5.14E+02
1.17E+03	5.16E+02
1.18E+03	5.13E+02
1.18E+03	5.15E+02
1.18E+03	5.14E+02
1.18E+03	5.13E+02
1.19E+03	5.14E+02
1.19E+03	5.13E+02
1.19E+03	5.10E+02
1.19E+03	5.11E+02
1.20E+03	5.12E+02
1.20E+03	5.12E+02
1.20E+03	5.10E+02
1.20E+03	5.12E+02
1.21E+03	5.10E+02
1.21E+03	5.09E+02
1.21E+03	5.10E+02
1.21E+03	5.08E+02
1.22E+03	5.08E+02
1.22E+03	5.07E+02
1.22E+03	5.09E+02
1.22E+03	5.10E+02
1.23E+03	5.11E+02
1.23E+03	5.10E+02
1.23E+03	5.08E+02
1.23E+03	5.12E+02
1.24E+03	5.10E+02
1.24E+03	5.08E+02
1.24E+03	5.12E+02
1.24E+03	5.11E+02
1.25E+03	5.09E+02
1.25E+03	5.11E+02
1.25E+03	5.09E+02
1.25E+03	5.12E+02
1.26E+03	5.09E+02
1.26E+03	5.10E+02
1.26E+03	5.11E+02
1.26E+03	5.11E+02
1.27E+03	5.10E+02
1.27E+03	5.10E+02
1.27E+03	5.08E+02
1.27E+03	5.10E+02
1.28E+03	5.09E+02
1.28E+03	5.09E+02
1.28E+03	5.08E+02
1.28E+03	5.09E+02
1.29E+03	5.08E+02
1.29E+03	5.06E+02
1.29E+03	5.07E+02
1.30E+03	5.08E+02
1.30E+03	5.07E+02
1.30E+03	5.07E+02
1.30E+03	5.07E+02
1.31E+03	5.07E+02
1.31E+03	5.07E+02
1.31E+03	5.05E+02
1.31E+03	5.05E+02
1.32E+03	5.04E+02
1.32E+03	5.04E+02
1.32E+03	5.03E+02
1.32E+03	5.04E+02
1.33E+03	5.03E+02
1.33E+03	5.03E+02
1.33E+03	5.03E+02
1.33E+03	5.02E+02
1.34E+03	5.02E+02
1.34E+03	5.03E+02
1.34E+03	5.02E+02
1.34E+03	5.04E+02
1.35E+03	5.04E+02
1.35E+03	5.02E+02
1.35E+03	5.03E+02
1.35E+03	5.04E+02
1.36E+03	5.04E+02
1.36E+03	5.03E+02
1.36E+03	5.03E+02
1.36E+03	5.03E+02
1.37E+03	5.04E+02
1.37E+03	5.05E+02
1.37E+03	5.01E+02
1.37E+03	5.04E+02
1.38E+03	5.02E+02
1.38E+03	5.03E+02
1.38E+03	5.04E+02
1.38E+03	5.02E+02
1.39E+03	5.02E+02
1.39E+03	5.04E+02
1.39E+03	5.04E+02
1.39E+03	5.03E+02
1.40E+03	5.05E+02
1.40E+03	5.02E+02
1.40E+03	5.04E+02
1.40E+03	5.03E+02
1.41E+03	5.04E+02
1.41E+03	5.03E+02
1.41E+03	5.04E+02
1.41E+03	5.03E+02
1.42E+03	5.04E+02
1.42E+03	5.02E+02
1.42E+03	5.05E+02
1.42E+03	5.06E+02
1.43E+03	5.05E+02
1.43E+03	5.04E+02
1.43E+03	5.07E+02
1.43E+03	5.06E+02
1.44E+03	5.08E+02
1.44E+03	5.07E+02
1.44E+03	5.07E+02
1.44E+03	5.07E+02
1.45E+03	5.08E+02
1.45E+03	5.08E+02
1.45E+03	5.07E+02
1.45E+03	5.06E+02
1.46E+03	5.08E+02
1.46E+03	5.08E+02
1.46E+03	5.07E+02
1.46E+03	5.09E+02
1.47E+03	5.06E+02
1.47E+03	5.08E+02
1.47E+03	5.07E+02
1.47E+03	5.08E+02
1.48E+03	5.04E+02
1.48E+03	5.04E+02
1.48E+03	5.07E+02
1.48E+03	5.05E+02
1.49E+03	5.05E+02
1.49E+03	5.06E+02
1.49E+03	5.05E+02
1.49E+03	5.06E+02
1.50E+03	5.05E+02
1.50E+03	5.06E+02
1.50E+03	5.07E+02
1.50E+03	5.07E+02
1.50E+03	5.05E+02
1.51E+03	5.05E+02
1.51E+03	5.05E+02
1.51E+03	5.02E+02
1.51E+03	5.05E+02
1.52E+03	5.04E+02
1.52E+03	5.05E+02
1.52E+03	5.06E+02
1.52E+03	5.05E+02
1.53E+03	5.04E+02
1.53E+03	5.05E+02
1.53E+03	5.04E+02
1.53E+03	5.06E+02
1.54E+03	5.07E+02
1.54E+03	5.06E+02
1.54E+03	5.05E+02
1.54E+03	5.03E+02
1.55E+03	5.05E+02
1.55E+03	5.06E+02
1.55E+03	5.05E+02
1.55E+03	5.08E+02
1.56E+03	5.06E+02
1.56E+03	5.06E+02
1.56E+03	5.04E+02
1.56E+03	5.07E+02
1.57E+03	5.06E+02
1.57E+03	5.08E+02
1.57E+03	5.07E+02
1.57E+03	5.07E+02
1.58E+03	5.07E+02
1.58E+03	5.07E+02
1.58E+03	5.07E+02
1.58E+03	5.08E+02
1.59E+03	5.07E+02
1.59E+03	5.08E+02
1.59E+03	5.08E+02
1.59E+03	5.11E+02
1.60E+03	5.09E+02
1.60E+03	5.09E+02
1.60E+03	5.09E+02
1.60E+03	5.09E+02
1.61E+03	5.10E+02
1.61E+03	5.08E+02
1.61E+03	5.11E+02
1.61E+03	5.09E+02
1.62E+03	5.09E+02
1.62E+03	5.09E+02
1.62E+03	5.08E+02
1.62E+03	5.06E+02
1.62E+03	5.07E+02
1.63E+03	5.07E+02
1.63E+03	5.05E+02
1.63E+03	5.06E+02
1.63E+03	5.08E+02
1.64E+03	5.07E+02
1.64E+03	5.06E+02
1.64E+03	5.07E+02
1.64E+03	5.07E+02
1.65E+03	5.06E+02
1.65E+03	5.07E+02
1.65E+03	5.07E+02
1.65E+03	5.06E+02
1.66E+03	5.08E+02
1.66E+03	5.08E+02
1.66E+03	5.07E+02
1.66E+03	5.08E+02
1.67E+03	5.06E+02
1.67E+03	5.08E+02
1.67E+03	5.07E+02
1.67E+03	5.05E+02
1.68E+03	5.07E+02
1.68E+03	5.07E+02
1.68E+03	5.07E+02
1.68E+03	5.06E+02
1.69E+03	5.05E+02
1.69E+03	5.05E+02
1.69E+03	5.06E+02
1.69E+03	5.06E+02
1.70E+03	5.06E+02
1.70E+03	5.05E+02
1.70E+03	5.06E+02
1.70E+03	5.05E+02
1.70E+03	5.03E+02
1.71E+03	5.06E+02
1.71E+03	5.05E+02
1.71E+03	5.05E+02
1.71E+03	5.05E+02
1.72E+03	5.03E+02
1.72E+03	5.05E+02
1.72E+03	5.05E+02
1.72E+03	5.05E+02
1.73E+03	5.08E+02
1.73E+03	5.05E+02
1.73E+03	5.05E+02
1.73E+03	5.07E+02
1.74E+03	5.06E+02
1.74E+03	5.04E+02
1.74E+03	5.08E+02
1.74E+03	5.07E+02
1.75E+03	5.06E+02
1.75E+03	5.06E+02
1.75E+03	5.08E+02
1.75E+03	5.06E+02
1.76E+03	5.05E+02
1.76E+03	5.07E+02
1.76E+03	5.07E+02
1.76E+03	5.07E+02
1.76E+03	5.08E+02
1.77E+03	5.06E+02
1.77E+03	5.07E+02
1.77E+03	5.07E+02
1.77E+03	5.07E+02
1.78E+03	5.09E+02
1.78E+03	5.06E+02
1.78E+03	5.08E+02
1.78E+03	5.07E+02
1.79E+03	5.08E+02
1.79E+03	5.06E+02
1.79E+03	5.08E+02
1.79E+03	5.07E+02
1.80E+03	5.07E+02
1.80E+03	5.07E+02
1.80E+03	5.07E+02
1.80E+03	5.06E+02
1.81E+03	5.07E+02
1.81E+03	5.04E+02
1.81E+03	5.06E+02
1.81E+03	5.06E+02
1.81E+03	5.07E+02
1.82E+03	5.07E+02
1.82E+03	5.06E+02
1.82E+03	5.07E+02
1.82E+03	5.07E+02
1.83E+03	5.07E+02
1.83E+03	5.08E+02
1.83E+03	5.06E+02
1.83E+03	5.07E+02
1.84E+03	5.06E+02
1.84E+03	5.07E+02
1.84E+03	5.07E+02
1.84E+03	5.07E+02
1.85E+03	5.05E+02
1.85E+03	5.05E+02
1.85E+03	5.07E+02
1.85E+03	5.06E+02
1.85E+03	5.06E+02
1.86E+03	5.08E+02
1.86E+03	5.08E+02
1.86E+03	5.07E+02
1.86E+03	5.06E+02
1.87E+03	5.06E+02
1.87E+03	5.07E+02
1.87E+03	5.06E+02
1.87E+03	5.05E+02
1.88E+03	5.07E+02
1.88E+03	5.07E+02
1.88E+03	5.08E+02
1.88E+03	5.06E+02
1.89E+03	5.07E+02
1.89E+03	5.08E+02
1.89E+03	5.06E+02
1.89E+03	5.08E+02
1.89E+03	5.07E+02
1.90E+03	5.08E+02
1.90E+03	5.07E+02
1.90E+03	5.08E+02
1.90E+03	5.06E+02
1.91E+03	5.08E+02
1.91E+03	5.09E+02
1.91E+03	5.06E+02
1.91E+03	5.08E+02
1.92E+03	5.07E+02
1.92E+03	5.08E+02
1.92E+03	5.08E+02
1.92E+03	5.07E+02
1.93E+03	5.09E+02
1.93E+03	5.10E+02
1.93E+03	5.06E+02
1.93E+03	5.09E+02
1.93E+03	5.06E+02
1.94E+03	5.07E+02
1.94E+03	5.05E+02
1.94E+03	5.05E+02
1.94E+03	5.07E+02
1.95E+03	5.06E+02
1.95E+03	5.07E+02
1.95E+03	5.06E+02
1.95E+03	5.06E+02
1.96E+03	5.07E+02
1.96E+03	5.08E+02
1.96E+03	5.08E+02
1.96E+03	5.07E+02
1.96E+03	5.06E+02
1.97E+03	5.06E+02
1.97E+03	5.08E+02
1.97E+03	5.09E+02
1.97E+03	5.06E+02
1.98E+03	5.07E+02
1.98E+03	5.05E+02
1.98E+03	5.06E+02
1.98E+03	5.05E+02
1.99E+03	5.08E+02
1.99E+03	5.05E+02
1.99E+03	5.06E+02
1.99E+03	5.06E+02
2.00E+03	5.08E+02
2.00E+03	5.06E+02
2.00E+03	5.07E+02
2.00E+03	5.06E+02
2.00E+03	5.06E+02
2.01E+03	5.07E+02
2.01E+03	5.07E+02
2.01E+03	5.07E+02
2.01E+03	5.06E+02
2.02E+03	5.06E+02
2.02E+03	5.05E+02
2.02E+03	5.06E+02
2.02E+03	5.07E+02
2.03E+03	5.07E+02
2.03E+03	5.08E+02
2.03E+03	5.08E+02
2.03E+03	5.07E+02
2.03E+03	5.07E+02
2.04E+03	5.10E+02
2.04E+03	5.07E+02
2.04E+03	5.05E+02
2.04E+03	5.07E+02
2.05E+03	5.07E+02
2.05E+03	5.07E+02
2.05E+03	5.07E+02
2.05E+03	5.07E+02
2.06E+03	5.06E+02
2.06E+03	5.06E+02
2.06E+03	5.04E+02
2.06E+03	5.07E+02
2.06E+03	5.06E+02
2.07E+03	5.05E+02
2.07E+03	5.06E+02
2.07E+03	5.07E+02
2.07E+03	5.07E+02
2.08E+03	5.06E+02
2.08E+03	5.05E+02
2.08E+03	5.06E+02
2.08E+03	5.07E+02
2.09E+03	5.06E+02
2.09E+03	5.05E+02
2.09E+03	5.05E+02
2.09E+03	5.06E+02
2.09E+03	5.06E+02
2.10E+03	5.05E+02
2.10E+03	5.06E+02
2.10E+03	5.04E+02
2.10E+03	5.06E+02
2.11E+03	5.08E+02
2.11E+03	5.05E+02
2.11E+03	5.07E+02
2.11E+03	5.04E+02
2.11E+03	5.06E+02
2.12E+03	5.06E+02
2.12E+03	5.07E+02
2.12E+03	5.05E+02
2.12E+03	5.05E+02
2.13E+03	5.08E+02
2.13E+03	5.06E+02
2.13E+03	5.06E+02
2.13E+03	5.07E+02
2.14E+03	5.05E+02
2.14E+03	5.05E+02
2.14E+03	5.05E+02
2.14E+03	5.06E+02
2.14E+03	5.07E+02
2.15E+03	5.04E+02
2.15E+03	5.06E+02
2.15E+03	5.06E+02
2.15E+03	5.07E+02
2.16E+03	5.07E+02
2.16E+03	5.05E+02
2.16E+03	5.04E+02
2.16E+03	5.05E+02
2.16E+03	5.05E+02
2.17E+03	5.05E+02
2.17E+03	5.05E+02
2.17E+03	5.05E+02
2.17E+03	5.06E+02
2.18E+03	5.05E+02
2.18E+03	5.04E+02
2.18E+03	5.05E+02
2.18E+03	5.06E+02
2.19E+03	5.04E+02
2.19E+03	5.05E+02
2.19E+03	5.04E+02
2.19E+03	5.04E+02
2.19E+03	5.07E+02
2.20E+03	5.04E+02
2.20E+03	5.06E+02
2.20E+03	5.03E+02
2.20E+03	5.04E+02
2.21E+03	5.05E+02
2.21E+03	5.05E+02
2.21E+03	5.05E+02
2.21E+03	5.08E+02
2.21E+03	5.05E+02
2.22E+03	5.04E+02
2.22E+03	5.06E+02
2.22E+03	5.06E+02
2.22E+03	5.05E+02
2.23E+03	5.05E+02
2.23E+03	5.07E+02
2.23E+03	5.05E+02
2.23E+03	5.05E+02
2.23E+03	5.05E+02
2.24E+03	5.04E+02
2.24E+03	5.06E+02
2.24E+03	5.05E+02
2.24E+03	5.06E+02
2.25E+03	5.04E+02
2.25E+03	5.04E+02
2.25E+03	5.06E+02
2.25E+03	5.04E+02
2.26E+03	5.06E+02
2.26E+03	5.04E+02
2.26E+03	5.04E+02
2.26E+03	5.04E+02
2.26E+03	5.05E+02
2.27E+03	5.05E+02
2.27E+03	5.05E+02
2.27E+03	5.06E+02
2.27E+03	5.05E+02
2.28E+03	5.03E+02
2.28E+03	5.06E+02
2.28E+03	5.05E+02
2.28E+03	5.04E+02
2.28E+03	5.06E+02
2.29E+03	5.04E+02
2.29E+03	5.05E+02
2.29E+03	5.05E+02
2.29E+03	5.04E+02
2.30E+03	5.06E+02
2.30E+03	5.06E+02
2.30E+03	5.05E+02
2.30E+03	5.04E+02
2.30E+03	5.05E+02
2.31E+03	5.04E+02
2.31E+03	5.06E+02
2.31E+03	5.07E+02
2.31E+03	5.06E+02
2.32E+03	5.07E+02
2.32E+03	5.06E+02
2.32E+03	5.05E+02
2.32E+03	5.05E+02
2.32E+03	5.05E+02
2.33E+03	5.05E+02
2.33E+03	5.07E+02
2.33E+03	5.05E+02
2.33E+03	5.07E+02
2.34E+03	5.05E+02
2.34E+03	5.04E+02
2.34E+03	5.04E+02
2.34E+03	5.03E+02
2.34E+03	5.04E+02
2.35E+03	5.07E+02
2.35E+03	5.06E+02
2.35E+03	5.06E+02
2.35E+03	5.06E+02
2.36E+03	5.05E+02
2.36E+03	5.06E+02
2.36E+03	5.06E+02
2.36E+03	5.07E+02
2.36E+03	5.07E+02
2.37E+03	5.05E+02
2.37E+03	5.08E+02
2.37E+03	5.08E+02
2.37E+03	5.08E+02
2.38E+03	5.06E+02
2.38E+03	5.07E+02
2.38E+03	5.09E+02
2.38E+03	5.07E+02
2.38E+03	5.09E+02
2.39E+03	5.05E+02
2.39E+03	5.07E+02
2.39E+03	5.06E+02
2.39E+03	5.07E+02
2.40E+03	5.06E+02
2.40E+03	5.05E+02
2.40E+03	5.07E+02
2.40E+03	5.06E+02
2.40E+03	5.06E+02
2.41E+03	5.06E+02
2.41E+03	5.06E+02
2.41E+03	5.08E+02
2.41E+03	5.06E+02
2.41E+03	5.04E+02
2.42E+03	5.06E+02
2.42E+03	5.07E+02
2.42E+03	5.06E+02
2.42E+03	5.07E+02
2.43E+03	5.07E+02
2.43E+03	5.04E+02
2.43E+03	5.06E+02
2.43E+03	5.06E+02
2.43E+03	5.08E+02
2.44E+03	5.07E+02
2.44E+03	5.06E+02
2.44E+03	5.05E+02
2.44E+03	5.06E+02
2.45E+03	5.07E+02
2.45E+03	5.08E+02
2.45E+03	5.07E+02
2.45E+03	5.06E+02
2.45E+03	5.05E+02
2.46E+03	5.06E+02
2.46E+03	5.06E+02
2.46E+03	5.07E+02
2.46E+03	5.06E+02
2.47E+03	5.08E+02
2.47E+03	5.06E+02
2.47E+03	5.10E+02
2.47E+03	5.08E+02
2.47E+03	5.06E+02
2.48E+03	5.07E+02
2.48E+03	5.09E+02
2.48E+03	5.08E+02
2.48E+03	5.06E+02
2.48E+03	5.07E+02
2.49E+03	5.09E+02
2.49E+03	5.09E+02
2.49E+03	5.08E+02
2.49E+03	5.09E+02
2.50E+03	5.07E+02
2.50E+03	5.09E+02
2.50E+03	5.09E+02
2.50E+03	5.08E+02
2.50E+03	5.07E+02
2.51E+03	5.07E+02
2.51E+03	5.07E+02
2.51E+03	5.08E+02
2.51E+03	5.07E+02
2.52E+03	5.08E+02
2.52E+03	5.08E+02
2.52E+03	5.08E+02
2.52E+03	5.08E+02
2.52E+03	5.06E+02
2.53E+03	5.08E+02
2.53E+03	5.10E+02
2.53E+03	5.08E+02
2.53E+03	5.08E+02
2.53E+03	5.09E+02
2.54E+03	5.09E+02
2.54E+03	5.09E+02
2.54E+03	5.09E+02
2.54E+03	5.09E+02
2.55E+03	5.08E+02
2.55E+03	5.09E+02
2.55E+03	5.08E+02
2.55E+03	5.08E+02
2.55E+03	5.10E+02
2.56E+03	5.09E+02
2.56E+03	5.08E+02
2.56E+03	5.09E+02
2.56E+03	5.10E+02
2.56E+03	5.10E+02
2.57E+03	5.09E+02
2.57E+03	5.09E+02
2.57E+03	5.08E+02
2.57E+03	5.10E+02
2.58E+03	5.11E+02
2.58E+03	5.11E+02
2.58E+03	5.09E+02
2.58E+03	5.12E+02
2.58E+03	5.10E+02
2.59E+03	5.10E+02
2.59E+03	5.11E+02
2.59E+03	5.12E+02
2.59E+03	5.10E+02
2.59E+03	5.10E+02
2.60E+03	5.10E+02
2.60E+03	5.11E+02
2.60E+03	5.12E+02
2.60E+03	5.11E+02
2.61E+03	5.11E+02
2.61E+03	5.10E+02
2.61E+03	5.12E+02
2.61E+03	5.11E+02
2.61E+03	5.10E+02
2.62E+03	5.12E+02
2.62E+03	5.12E+02
2.62E+03	5.12E+02
2.62E+03	5.11E+02
2.62E+03	5.13E+02
2.63E+03	5.13E+02
2.63E+03	5.13E+02
2.63E+03	5.12E+02
2.63E+03	5.11E+02
2.64E+03	5.13E+02
2.64E+03	5.12E+02
2.64E+03	5.11E+02
2.64E+03	5.12E+02
2.64E+03	5.13E+02
2.65E+03	5.12E+02
2.65E+03	5.12E+02
2.65E+03	5.13E+02
2.65E+03	5.15E+02
2.65E+03	5.14E+02
2.66E+03	5.12E+02
2.66E+03	5.13E+02
2.66E+03	5.14E+02
2.66E+03	5.13E+02
2.67E+03	5.13E+02
2.67E+03	5.12E+02
2.67E+03	5.13E+02
2.67E+03	5.13E+02
2.67E+03	5.15E+02
2.68E+03	5.14E+02
2.68E+03	5.16E+02
2.68E+03	5.15E+02
2.68E+03	5.14E+02
2.68E+03	5.15E+02
2.69E+03	5.16E+02
2.69E+03	5.18E+02
2.69E+03	5.16E+02
2.69E+03	5.14E+02
2.69E+03	5.16E+02
2.70E+03	5.17E+02
2.70E+03	5.14E+02
2.70E+03	5.15E+02
2.70E+03	5.17E+02
2.71E+03	5.18E+02
2.71E+03	5.16E+02
2.71E+03	5.17E+02
2.71E+03	5.17E+02
2.71E+03	5.15E+02
2.72E+03	5.18E+02
2.72E+03	5.17E+02
2.72E+03	5.18E+02
2.72E+03	5.18E+02
2.72E+03	5.18E+02
2.73E+03	5.17E+02
2.73E+03	5.19E+02
2.73E+03	5.19E+02
2.73E+03	5.18E+02
2.73E+03	5.17E+02
2.74E+03	5.18E+02
2.74E+03	5.17E+02
2.74E+03	5.19E+02
2.74E+03	5.18E+02
2.75E+03	5.19E+02
2.75E+03	5.17E+02
2.75E+03	5.17E+02
2.75E+03	5.17E+02
2.75E+03	5.18E+02
2.76E+03	5.17E+02
2.76E+03	5.21E+02
2.76E+03	5.20E+02
2.76E+03	5.19E+02
2.76E+03	5.17E+02
2.77E+03	5.19E+02
2.77E+03	5.18E+02
2.77E+03	5.19E+02
2.77E+03	5.20E+02
2.77E+03	5.21E+02
2.78E+03	5.19E+02
2.78E+03	5.21E+02
2.78E+03	5.19E+02
2.78E+03	5.20E+02
2.79E+03	5.24E+02
2.79E+03	5.19E+02
2.79E+03	5.22E+02
2.79E+03	5.20E+02
2.79E+03	5.18E+02
2.80E+03	5.19E+02
2.80E+03	5.20E+02
2.80E+03	5.19E+02
2.80E+03	5.21E+02
2.80E+03	5.20E+02
2.81E+03	5.21E+02
2.81E+03	5.21E+02
2.81E+03	5.20E+02
2.81E+03	5.20E+02
2.81E+03	5.21E+02
2.82E+03	5.21E+02
2.82E+03	5.22E+02
2.82E+03	5.23E+02
2.82E+03	5.21E+02
2.82E+03	5.22E+02
2.83E+03	5.22E+02
2.83E+03	5.25E+02
2.83E+03	5.23E+02
2.83E+03	5.25E+02
2.84E+03	5.25E+02
2.84E+03	5.23E+02
2.84E+03	5.28E+02
2.84E+03	5.27E+02
2.84E+03	5.30E+02
2.85E+03	5.30E+02
2.85E+03	5.30E+02
2.85E+03	5.32E+02
2.85E+03	5.31E+02
2.85E+03	5.31E+02
2.86E+03	5.31E+02
2.86E+03	5.31E+02
2.86E+03	5.33E+02
2.86E+03	5.34E+02
2.86E+03	5.33E+02
2.87E+03	5.34E+02
2.87E+03	5.37E+02
2.87E+03	5.35E+02
2.87E+03	5.36E+02
2.87E+03	5.36E+02
2.88E+03	5.35E+02
2.88E+03	5.38E+02
2.88E+03	5.37E+02
2.88E+03	5.37E+02
2.88E+03	5.38E+02
2.89E+03	5.37E+02
2.89E+03	5.38E+02
2.89E+03	5.39E+02
2.89E+03	5.36E+02
2.89E+03	5.36E+02
2.90E+03	5.38E+02
2.90E+03	5.39E+02
2.90E+03	5.37E+02
2.90E+03	5.38E+02
2.91E+03	5.37E+02
2.91E+03	5.35E+02
2.91E+03	5.37E+02
2.91E+03	5.37E+02
2.91E+03	5.37E+02
2.92E+03	5.39E+02
2.92E+03	5.36E+02
2.92E+03	5.37E+02
2.92E+03	5.39E+02
2.92E+03	5.36E+02
2.93E+03	5.40E+02
2.93E+03	5.37E+02
2.93E+03	5.38E+02
2.93E+03	5.39E+02
2.93E+03	5.37E+02
2.94E+03	5.37E+02
2.94E+03	5.37E+02
2.94E+03	5.35E+02
2.94E+03	5.36E+02
2.94E+03	5.35E+02
2.95E+03	5.36E+02
2.95E+03	5.34E+02
2.95E+03	5.36E+02
2.95E+03	5.38E+02
2.95E+03	5.36E+02
2.96E+03	5.37E+02
2.96E+03	5.36E+02
2.96E+03	5.35E+02
2.96E+03	5.37E+02
2.96E+03	5.36E+02
2.97E+03	5.35E+02
2.97E+03	5.36E+02
2.97E+03	5.37E+02
2.97E+03	5.35E+02
2.97E+03	5.35E+02
2.98E+03	5.33E+02
2.98E+03	5.32E+02
2.98E+03	5.33E+02
2.98E+03	5.34E+02
2.98E+03	5.35E+02
2.99E+03	5.36E+02
2.99E+03	5.35E+02
2.99E+03	5.35E+02
2.99E+03	5.35E+02
2.99E+03	5.34E+02
3.00E+03	5.34E+02
3.00E+03	5.35E+02
3.00E+03	5.35E+02
3.00E+03	5.33E+02
3.01E+03	5.34E+02
3.01E+03	5.36E+02
3.01E+03	5.35E+02
3.01E+03	5.35E+02
3.01E+03	5.36E+02
3.02E+03	5.37E+02
3.02E+03	5.35E+02
3.02E+03	5.37E+02
3.02E+03	5.36E+02
3.02E+03	5.37E+02
3.03E+03	5.36E+02
3.03E+03	5.35E+02
3.03E+03	5.35E+02
3.03E+03	5.36E+02
3.03E+03	5.37E+02
3.04E+03	5.35E+02
3.04E+03	5.37E+02
3.04E+03	5.37E+02
3.04E+03	5.38E+02
3.04E+03	5.40E+02
3.05E+03	5.38E+02
3.05E+03	5.39E+02
3.05E+03	5.39E+02
3.05E+03	5.39E+02
3.05E+03	5.38E+02
3.06E+03	5.40E+02
3.06E+03	5.41E+02
3.06E+03	5.43E+02
3.06E+03	5.40E+02
3.06E+03	5.41E+02
3.07E+03	5.45E+02
3.07E+03	5.47E+02
3.07E+03	5.46E+02
3.07E+03	5.44E+02
3.07E+03	5.42E+02
3.08E+03	5.42E+02
3.08E+03	5.43E+02
3.08E+03	5.39E+02
3.08E+03	5.42E+02
3.08E+03	5.42E+02
3.09E+03	5.40E+02
3.09E+03	5.42E+02
3.09E+03	5.43E+02
3.09E+03	5.42E+02
3.09E+03	5.42E+02
3.10E+03	5.41E+02
3.10E+03	5.40E+02
3.10E+03	5.43E+02
3.10E+03	5.46E+02
3.10E+03	5.43E+02
3.11E+03	5.44E+02
3.11E+03	5.43E+02
3.11E+03	5.44E+02
3.11E+03	5.47E+02
3.11E+03	5.44E+02
3.12E+03	5.43E+02
3.12E+03	5.43E+02
3.12E+03	5.45E+02
3.12E+03	5.44E+02
3.12E+03	5.43E+02
3.13E+03	5.47E+02
3.13E+03	5.45E+02
3.13E+03	5.44E+02
3.13E+03	5.44E+02
3.13E+03	5.45E+02
3.14E+03	5.45E+02
3.14E+03	5.46E+02
3.14E+03	5.44E+02
3.14E+03	5.48E+02
3.14E+03	5.47E+02
3.15E+03	5.48E+02
3.15E+03	5.47E+02
3.15E+03	5.46E+02
3.15E+03	5.48E+02
3.15E+03	5.46E+02
3.16E+03	5.48E+02
3.16E+03	5.51E+02
3.16E+03	5.48E+02
3.16E+03	5.48E+02
3.16E+03	5.48E+02
3.17E+03	5.48E+02
3.17E+03	5.49E+02
3.17E+03	5.49E+02
3.17E+03	5.50E+02
3.17E+03	5.50E+02
3.18E+03	5.49E+02
3.18E+03	5.50E+02
3.18E+03	5.52E+02
3.18E+03	5.50E+02
3.18E+03	5.49E+02
3.19E+03	5.52E+02
3.19E+03	5.50E+02
3.19E+03	5.49E+02
3.19E+03	5.52E+02
3.19E+03	5.54E+02
3.19E+03	5.51E+02
3.20E+03	5.54E+02
3.20E+03	5.54E+02
3.20E+03	5.53E+02
3.20E+03	5.54E+02
3.20E+03	5.55E+02
3.21E+03	5.56E+02
3.21E+03	5.53E+02
3.21E+03	5.53E+02
3.21E+03	5.55E+02
3.21E+03	5.55E+02
3.22E+03	5.57E+02
3.22E+03	5.55E+02
3.22E+03	5.61E+02
3.22E+03	5.59E+02
3.22E+03	5.57E+02
3.23E+03	5.58E+02
3.23E+03	5.57E+02
3.23E+03	5.57E+02
3.23E+03	5.57E+02
3.23E+03	5.56E+02
3.24E+03	5.57E+02
3.24E+03	5.57E+02
3.24E+03	5.61E+02
3.24E+03	5.60E+02
3.24E+03	5.60E+02
3.25E+03	5.59E+02
3.25E+03	5.59E+02
3.25E+03	5.59E+02
3.25E+03	5.60E+02
3.25E+03	5.60E+02
3.26E+03	5.59E+02
3.26E+03	5.60E+02
3.26E+03	5.61E+02
3.26E+03	5.63E+02
3.26E+03	5.60E+02
3.27E+03	5.64E+02
3.27E+03	5.63E+02
3.27E+03	5.65E+02
3.27E+03	5.63E+02
3.27E+03	5.64E+02
3.28E+03	5.63E+02
3.28E+03	5.62E+02
3.28E+03	5.64E+02
3.28E+03	5.62E+02
3.28E+03	5.62E+02
3.29E+03	5.64E+02
3.29E+03	5.61E+02
3.29E+03	5.64E+02
3.29E+03	5.63E+02
3.29E+03	5.63E+02
3.29E+03	5.67E+02
3.30E+03	5.68E+02
3.30E+03	5.67E+02
3.30E+03	5.68E+02
3.30E+03	5.68E+02
3.30E+03	5.66E+02
3.31E+03	5.68E+02
3.31E+03	5.68E+02
3.31E+03	5.68E+02
3.31E+03	5.67E+02
3.31E+03	5.68E+02
3.32E+03	5.67E+02
3.32E+03	5.70E+02
3.32E+03	5.69E+02
3.32E+03	5.69E+02
3.32E+03	5.66E+02
3.33E+03	5.66E+02
3.33E+03	5.67E+02
3.33E+03	5.71E+02
3.33E+03	5.73E+02
3.33E+03	5.71E+02
3.34E+03	5.72E+02
3.34E+03	5.71E+02
3.34E+03	5.75E+02
3.34E+03	5.73E+02
3.34E+03	5.73E+02
3.35E+03	5.74E+02
3.35E+03	5.73E+02
3.35E+03	5.77E+02
3.35E+03	5.76E+02
3.35E+03	5.76E+02
3.35E+03	5.77E+02
3.36E+03	5.78E+02
3.36E+03	5.78E+02
3.36E+03	5.77E+02
3.36E+03	5.80E+02
3.36E+03	5.82E+02
3.37E+03	5.86E+02
3.37E+03	5.81E+02
3.37E+03	5.80E+02
3.37E+03	5.83E+02
3.37E+03	5.81E+02
3.38E+03	5.81E+02
3.38E+03	5.81E+02
3.38E+03	5.84E+02
3.38E+03	5.88E+02
3.38E+03	5.85E+02
3.39E+03	5.85E+02
3.39E+03	5.86E+02
3.39E+03	5.87E+02
3.39E+03	5.85E+02
3.39E+03	5.89E+02
3.40E+03	5.89E+02
3.40E+03	5.89E+02
3.40E+03	5.92E+02
3.40E+03	5.90E+02
3.40E+03	5.90E+02
3.40E+03	5.89E+02
3.41E+03	5.90E+02
3.41E+03	5.87E+02
3.41E+03	5.90E+02
3.41E+03	5.91E+02
3.41E+03	5.93E+02
3.42E+03	5.94E+02
3.42E+03	5.92E+02
3.42E+03	5.92E+02
3.42E+03	5.92E+02
3.42E+03	5.96E+02
3.43E+03	5.97E+02
3.43E+03	5.94E+02
3.43E+03	5.93E+02
3.43E+03	5.96E+02
3.43E+03	5.96E+02
3.44E+03	5.96E+02
3.44E+03	5.98E+02
3.44E+03	5.96E+02
3.44E+03	5.93E+02
3.44E+03	6.00E+02
3.44E+03	6.01E+02
3.45E+03	5.99E+02
3.45E+03	5.94E+02
3.45E+03	5.97E+02
3.45E+03	5.97E+02
3.45E+03	6.00E+02
3.46E+03	5.99E+02
3.46E+03	5.99E+02
3.46E+03	5.96E+02
3.46E+03	6.02E+02
3.46E+03	6.03E+02
3.47E+03	6.01E+02
3.47E+03	6.01E+02
3.47E+03	6.04E+02
3.47E+03	6.03E+02
3.47E+03	6.07E+02
3.48E+03	6.09E+02
3.48E+03	6.08E+02
3.48E+03	6.02E+02
3.48E+03	6.06E+02
3.48E+03	6.04E+02
3.48E+03	6.07E+02
3.49E+03	6.06E+02
3.49E+03	6.09E+02
3.49E+03	6.12E+02
3.49E+03	6.11E+02
3.49E+03	6.18E+02
3.50E+03	6.14E+02
3.50E+03	6.12E+02
3.50E+03	6.12E+02
3.50E+03	6.12E+02
3.50E+03	6.13E+02
3.51E+03	6.13E+02
3.51E+03	6.14E+02
3.51E+03	6.21E+02
3.51E+03	6.17E+02
3.51E+03	6.14E+02
3.51E+03	6.14E+02
3.52E+03	6.17E+02
3.52E+03	6.14E+02
3.52E+03	6.17E+02
3.52E+03	6.18E+02
3.52E+03	6.12E+02
3.53E+03	6.15E+02
3.53E+03	6.17E+02
3.53E+03	6.14E+02
3.53E+03	6.16E+02
3.53E+03	6.18E+02
3.54E+03	6.18E+02
3.54E+03	6.22E+02
3.54E+03	6.17E+02
3.54E+03	6.16E+02
3.54E+03	6.19E+02
3.54E+03	6.17E+02
3.55E+03	6.16E+02
3.55E+03	6.22E+02
3.55E+03	6.21E+02
3.55E+03	6.21E+02
3.55E+03	6.20E+02
3.56E+03	6.20E+02
3.56E+03	6.22E+02
3.56E+03	6.22E+02
3.56E+03	6.19E+02
3.56E+03	6.24E+02
3.57E+03	6.26E+02
3.57E+03	6.21E+02
3.57E+03	6.25E+02
3.57E+03	6.23E+02
3.57E+03	6.21E+02
3.57E+03	6.22E+02
3.58E+03	6.22E+02
3.58E+03	6.27E+02
3.58E+03	6.24E+02
3.58E+03	6.21E+02
3.58E+03	6.25E+02
3.59E+03	6.25E+02
3.59E+03	6.26E+02
3.59E+03	6.27E+02
3.59E+03	6.27E+02
3.59E+03	6.29E+02
3.60E+03	6.27E+02
3.60E+03	6.26E+02
3.60E+03	6.28E+02
3.60E+03	6.30E+02
3.60E+03	6.29E+02
3.60E+03	6.30E+02
3.61E+03	6.29E+02
3.61E+03	6.31E+02
3.61E+03	6.32E+02
3.61E+03	6.33E+02
3.61E+03	6.35E+02
3.62E+03	6.33E+02
3.62E+03	6.36E+02
3.62E+03	6.35E+02
3.62E+03	6.34E+02
3.62E+03	6.38E+02
3.62E+03	6.37E+02
3.63E+03	6.32E+02
3.63E+03	6.36E+02
3.63E+03	6.39E+02
3.63E+03	6.39E+02
3.63E+03	6.37E+02
3.64E+03	6.41E+02
3.64E+03	6.41E+02
3.64E+03	6.42E+02
3.64E+03	6.44E+02
3.64E+03	6.44E+02
3.65E+03	6.44E+02
3.65E+03	6.40E+02
3.65E+03	6.47E+02
3.65E+03	6.48E+02
3.65E+03	6.47E+02
3.65E+03	6.46E+02
3.66E+03	6.47E+02
3.66E+03	6.52E+02
3.66E+03	6.48E+02
3.66E+03	6.53E+02
3.66E+03	6.48E+02
3.67E+03	6.50E+02
3.67E+03	6.50E+02
3.67E+03	6.54E+02
3.67E+03	6.55E+02
3.67E+03	6.54E+02
3.67E+03	6.52E+02
3.68E+03	6.55E+02
3.68E+03	6.58E+02
3.68E+03	6.56E+02
3.68E+03	6.59E+02
3.68E+03	6.59E+02
3.69E+03	6.57E+02
3.69E+03	6.59E+02
3.69E+03	6.59E+02
3.69E+03	6.61E+02
3.69E+03	6.61E+02
3.69E+03	6.61E+02
3.70E+03	6.64E+02
3.70E+03	6.63E+02
3.70E+03	6.61E+02
3.70E+03	6.64E+02
3.70E+03	6.61E+02
3.71E+03	6.66E+02
3.71E+03	6.68E+02
3.71E+03	6.68E+02
3.71E+03	6.67E+02
3.71E+03	6.69E+02
3.72E+03	6.72E+02
3.72E+03	6.71E+02
3.72E+03	6.75E+02
3.72E+03	6.76E+02
3.72E+03	6.79E+02
3.72E+03	6.76E+02
3.73E+03	6.72E+02
3.73E+03	6.72E+02
3.73E+03	6.77E+02
3.73E+03	6.78E+02
3.73E+03	6.84E+02
3.74E+03	6.85E+02
3.74E+03	6.83E+02
3.74E+03	6.84E+02
3.74E+03	6.84E+02
3.74E+03	6.81E+02
3.74E+03	6.82E+02
3.75E+03	6.86E+02
3.75E+03	6.88E+02
3.75E+03	6.97E+02
3.75E+03	6.92E+02
3.75E+03	6.92E+02
3.76E+03	6.94E+02
3.76E+03	6.94E+02
3.76E+03	6.93E+02
3.76E+03	6.92E+02
3.76E+03	6.96E+02
3.76E+03	6.99E+02
3.77E+03	6.94E+02
3.77E+03	7.00E+02
3.77E+03	6.98E+02
3.77E+03	7.05E+02
3.77E+03	7.06E+02
3.78E+03	7.02E+02
3.78E+03	7.05E+02
3.78E+03	7.02E+02
3.78E+03	7.05E+02
3.78E+03	7.10E+02
3.78E+03	7.06E+02
3.79E+03	7.11E+02
3.79E+03	7.15E+02
3.79E+03	7.11E+02
3.79E+03	7.18E+02
3.79E+03	7.09E+02
3.80E+03	7.16E+02
3.80E+03	7.19E+02
3.80E+03	7.24E+02
3.80E+03	7.23E+02
3.80E+03	7.25E+02
3.80E+03	7.26E+02
3.81E+03	7.27E+02
3.81E+03	7.30E+02
3.81E+03	7.27E+02
3.81E+03	7.32E+02
3.81E+03	7.32E+02
3.81E+03	7.32E+02
3.82E+03	7.35E+02
3.82E+03	7.38E+02
3.82E+03	7.35E+02
3.82E+03	7.35E+02
3.82E+03	7.32E+02
3.83E+03	7.32E+02
3.83E+03	7.37E+02
3.83E+03	7.36E+02
3.83E+03	7.40E+02
3.83E+03	7.43E+02
3.83E+03	7.50E+02
3.84E+03	7.47E+02
3.84E+03	7.46E+02
3.84E+03	7.49E+02
3.84E+03	7.52E+02
3.84E+03	7.49E+02
3.85E+03	7.52E+02
3.85E+03	7.51E+02
3.85E+03	7.53E+02
3.85E+03	7.58E+02
3.85E+03	7.57E+02
3.85E+03	7.61E+02
3.86E+03	7.62E+02
3.86E+03	7.70E+02
3.86E+03	7.74E+02
3.86E+03	7.73E+02
3.86E+03	7.67E+02
3.87E+03	7.70E+02

[truncated: 11 more sheets: Carbonate 3A, Diamond 3B, Diamond 3F 1, Diamond 3F 2, Spessartine 3F 3, Spessartine 3F 4, Diamond 3I, Diamond 3L 1, Diamond 3L 2, Graphite 3L 3, Almandine 3L 4]
